# Supplementary material for: Comprehensive analysis reveals key genes and environmental toxin exposures underlying treatment response in ulcerative colitis based on in-silico analysis and Mendelian randomization
Source: Aging (Albany NY). 2023 Dec 4;15(23):14141–71. doi: 10.18632/aging.205294 (PMC10756092; doi:10.18632/aging.205294)
Supplement: Supplementary Table 1 [file aging-15-205294-s002.xls]

## Sheet: Supplementary Table 1
Supplementary Table 1. The DEGs between non-responding and responding UC patients treated with 5-ASA, corticosteroid, golimumab, and infliximab.
5ASA
Tag	logFC	AveExpr	t	P.Value	adj.P.Val	B
MT-ND3	2118.67	11067.1	2.0346	0.0470703	0.995556	-5.80441
FABP1	633.036	1633.02	2.0533	0.0451535	0.995556	-5.76843
MTATP6P1	574.129	2597.83	2.38786	0.0206628	0.995556	-5.07889
RNASE1	38.1107	113.11	2.26502	0.0277599	0.995556	-5.34198
HMGCS2	30.7398	38.8214	2.45175	0.0176565	0.995556	-4.93766
PCK1	23.3262	26.9957	2.68803	0.00966574	0.995556	-4.39025
LINC01559	14.8742	30.6737	2.05663	0.0448203	0.995556	-5.76201
HSD17B2	8.23267	24.4913	2.1513	0.036179	0.995556	-5.57537
PKDCC	7.58982	20.8871	3.09185	0.00321205	0.995556	-3.36936
MSLN	4.37012	3.46982	2.08212	0.0423329	0.995556	-5.71245
CRYAB	3.97118	12.1681	2.67021	0.0101265	0.995556	-4.43287
SDR39U1	3.08424	22.6119	2.42569	0.0188317	0.995556	-4.99563
AC073333.1	2.79267	10.9497	2.38744	0.0206839	0.995556	-5.0798
MAPRE3	2.74441	9.38986	2.05551	0.0449321	0.995556	-5.76417
LINC01082	2.63402	11.8728	2.08714	0.041857	0.995556	-5.70262
RP11-326A19.5	2.51504	10.4024	2.50034	0.0156408	0.995556	-4.82828
C7orf43	2.44013	18.5148	2.06357	0.0441309	0.995556	-5.74857
SLC27A4	2.33743	12.5441	2.22802	0.0302863	0.995556	-5.41902
RNU5B-2P	2.24168	4.29565	2.919	0.00520213	0.995556	-3.81887
SERF1B	2.1181	14.3706	2.301	0.0254848	0.995556	-5.26609
SNHG7	1.97483	14.9981	2.04705	0.0457874	0.995556	-5.7805
CRYBB2P1	1.9634	8.66762	2.11631	0.0391857	0.995556	-5.64517
SLC45A3	1.80014	8.45663	2.10658	0.04006	0.995556	-5.66442
MICA	1.69269	9.18278	2.30969	0.024961	0.995556	-5.24762
FAM156B	1.67587	5.38437	2.31066	0.0249032	0.995556	-5.24555
OSR1	1.63659	2.41106	2.78392	0.00750025	0.995556	-4.15724
HPGDS	1.60039	3.46637	2.72982	0.00865945	0.995556	-4.28943
MIR23A	1.59	2.61723	2.13807	0.0372912	0.995556	-5.60188
AL662800.1	1.58274	4.52203	2.01195	0.0494857	0.995556	-5.8476
DPP10-AS1	1.55039	1.71884	2.7306	0.00864172	0.995556	-4.28754
AL355480.3	1.53314	2.49785	2.52901	0.0145515	0.995556	-4.76295
BAMBI	1.45904	3.85511	2.26898	0.0275015	0.995556	-5.33369
CTD-3018O17.5	1.40632	2.60339	2.13345	0.037687	0.995556	-5.61111
SLC35G1	1.34649	4.31979	2.17804	0.0340201	0.995556	-5.5214
HPDL	1.31231	3.35562	2.80555	0.0070781	0.995556	-4.10383
MT1A	1.31142	2.84597	2.53968	0.0141639	0.995556	-4.73849
RP11-311C24.1	1.1953	9.36271	2.09925	0.04073	0.995556	-5.67887
EGFL8	1.18681	6.01367	2.35203	0.022543	0.995556	-5.15679
EVA1C	1.12099	6.32496	2.42114	0.0190441	0.995556	-5.0057
ID4	1.11524	4.35979	2.38322	0.020898	0.995556	-5.08903
XXbac-B461K10.4	1.10258	4.16422	2.85379	0.00621471	0.995556	-3.98367
FCER1A	1.08468	2.54654	2.40195	0.0199628	0.995556	-5.04799
SGK223	1.06808	4.03657	2.25308	0.0285542	0.995556	-5.36696
MIR548I2	1.06185	0.900746	3.44009	0.00116315	0.995556	-2.41145
TRIM7	1.01913	1.83684	2.83629	0.00651593	0.995556	-4.02743
HPX	1.00369	1.72372	2.81372	0.00692445	0.995556	-4.08358
SNORA76	0.986461	0.59856	2.19345	0.0328277	0.995556	-5.49004
MED31	0.973947	9.80271	2.38805	0.0206531	0.995556	-5.07846
MIR6757	0.969082	1.17316	2.55252	0.0137102	0.995556	-4.70896
AL138807.1	0.951723	1.3685	2.02431	0.0481549	0.995556	-5.82409
WSCD1	0.927372	2.71991	2.39705	0.020204	0.995556	-5.05876
RP4-635E18.8	0.923521	6.09249	2.09665	0.04097	0.995556	-5.68398
CEACAM19	0.893702	2.84778	2.56074	0.0134264	0.995556	-4.68997
AC024571.1	0.893037	0.744505	2.54803	0.0138672	0.995556	-4.71929
AL592205.2	0.890906	0.696695	2.62365	0.0114268	0.995556	-4.54322
AC069294.1	0.886125	1.55696	2.0078	0.0499402	0.995556	-5.85548
RP11-552M11.4	0.877065	4.65324	2.44646	0.0178897	0.995556	-4.94947
TSEN2	0.873825	6.34052	2.14576	0.0366419	0.995556	-5.58651
GHR	0.861221	2.42172	2.12966	0.0380143	0.995556	-5.61867
GS1-114I9.1	0.841041	3.52669	2.31587	0.0245945	0.995556	-5.23445
AC035144.1	0.817704	0.463688	2.55101	0.0137627	0.995556	-4.71243
EEPD1	0.816613	5.73815	2.1141	0.0393835	0.995556	-5.64956
MIR29C	0.815128	0.819128	2.36098	0.0220594	0.995556	-5.13741
FSTL3	0.808914	3.61674	2.33221	0.0236476	0.995556	-5.19947
HIST1H1PS1	0.808052	1.58347	2.11479	0.0393218	0.995556	-5.64819
RNU1-61P	0.773523	0.390213	2.39759	0.0201772	0.995556	-5.05757
DEPDC7	0.758583	2.13088	3.11106	0.00304158	0.995556	-3.31828
PTGDR2	0.753401	1.92032	2.1082	0.0399137	0.995556	-5.66123
MIR194-1	0.741691	0.65077	2.01594	0.0490533	0.995556	-5.84004
TMEM100	0.728606	1.82856	2.81764	0.00685181	0.995556	-4.07385
TM6SF2	0.721675	1.55551	2.2765	0.0270151	0.995556	-5.31787
SNHG22	0.692788	2.15673	2.52399	0.0147369	0.995556	-4.77442
RNU6-1043P	0.682035	0.448591	3.61847	0.000676861	0.995556	-1.89598
LINC01176	0.662606	3.07897	2.10551	0.0401572	0.995556	-5.66653
MIR661	0.66166	0.579307	2.49951	0.0156732	0.995556	-4.83015
LCN6	0.658684	1.00794	2.90341	0.00542917	0.995556	-3.8585
DPP10	0.650034	1.02935	2.38452	0.0208322	0.995556	-5.0862
AC010235.1	0.63618	0.515001	2.10386	0.0403073	0.995556	-5.66978
RP5-965G21.4	0.630185	1.59393	2.99061	0.00426811	0.995556	-3.63483
BMX	0.630061	2.22607	2.01513	0.0491403	0.995556	-5.84157
VCAN-AS1	0.62084	1.08132	2.21019	0.0315745	0.995556	-5.45576
SPINK2	0.618504	1.59035	2.46496	0.0170864	0.995556	-4.90809
SNORD116-6	0.599393	0.506837	2.21753	0.0310382	0.995556	-5.44066
ATOH8	0.592721	3.04125	2.47919	0.016491	0.995556	-4.87609
CTA-29F11.1	0.577172	2.48782	3.35894	0.00148121	0.995556	-2.64058
RP11-345P4.10	0.572881	0.507453	2.70915	0.00914447	0.995556	-4.33944
RNU6-1176P	0.567213	0.256149	3.40919	0.00127574	0.995556	-2.49912
MIR505	0.562917	0.254285	2.52696	0.0146271	0.995556	-4.76765
L1CAM	0.549943	1.76039	2.22459	0.0305302	0.995556	-5.4261
RP11-841O20.2	0.54858	0.407388	2.73372	0.00857071	0.995556	-4.27997
NPIPB11	0.527041	1.74694	2.54913	0.0138287	0.995556	-4.71677
RP11-147I3.1	0.526928	2.10969	2.2762	0.0270345	0.995556	-5.31851
RP11-180C16.1	0.525818	1.23976	2.05807	0.0446758	0.995556	-5.75921
AC114302.1	0.524579	0.511711	2.21479	0.0312373	0.995556	-5.4463
MNX1-AS2	0.513782	1.63495	2.08913	0.0416702	0.995556	-5.69873
AC005783.1	0.508662	0.454405	2.33371	0.0235624	0.995556	-5.19626
PON3	0.508532	2.12657	2.51729	0.0149883	0.995556	-4.78974
SIGLEC17P	0.497448	1.38632	2.15871	0.0355693	0.995556	-5.56048
RP5-1112D6.4	0.496923	2.86337	2.32482	0.0240716	0.995556	-5.21531
RNU6-432P	0.48723	0.22144	2.32796	0.0238904	0.995556	-5.20858
RP11-20G6.1	0.47328	0.764942	3.04504	0.00366558	0.995556	-3.49286
HLA-DPB2	0.468904	1.15955	2.31874	0.0244258	0.995556	-5.22832
TMEM63C	0.465576	1.08456	2.23288	0.0299431	0.995556	-5.40896
IGSF21	0.461758	0.792659	2.06853	0.0436432	0.995556	-5.73893
RNU6-584P	0.460972	0.362663	2.50884	0.0153102	0.995556	-4.80896
MIR3159	0.455335	0.413215	2.2	0.0323324	0.995556	-5.47666
RP4-765C7.2	0.453886	0.415417	2.71744	0.00894699	0.995556	-4.31941
CTC-297N7.10	0.452441	0.623337	2.09231	0.0413723	0.995556	-5.69249
DDX11L2	0.450166	0.871691	2.09099	0.0414956	0.995556	-5.69508
GFRA3	0.445905	1.21484	2.61063	0.011817	0.995556	-4.57383
RAB6B	0.441808	0.880886	2.081	0.0424396	0.995556	-5.71464
FOXP4-AS1	0.433287	1.67557	2.12853	0.0381119	0.995556	-5.62091
ETV4	0.431919	1.31005	2.32832	0.02387	0.995556	-5.20782
MIR4296	0.426639	0.344269	2.64057	0.0109375	0.995556	-4.50328
RNU6-761P	0.421582	0.225082	2.66519	0.0102597	0.995556	-4.44482
SCARNA1	0.418846	0.318717	2.78682	0.00744229	0.995556	-4.15009
SOX10	0.41737	0.848952	2.60168	0.012092	0.995556	-4.59479
NMU	0.413208	1.7821	2.08592	0.0419724	0.995556	-5.70502
PRCD	0.407824	1.87142	2.59728	0.0122294	0.995556	-4.60508
SNORD88	0.4069	0.274364	2.21011	0.0315798	0.995556	-5.45591
COX5BP6	0.395172	0.889502	2.06154	0.0443314	0.995556	-5.7525
RP13-1016M1.2	0.392344	0.612554	3.30364	0.0017435	0.995556	-2.79473
C11orf53	0.3898	1.31901	2.49391	0.0158948	0.995556	-4.84284
MIR4742	0.388151	0.38712	2.17512	0.0342501	0.995556	-5.52732
CTD-2323K18.1	0.373818	0.852164	2.07146	0.0433576	0.995556	-5.73323
RP13-401N8.1	0.372247	1.16703	2.07835	0.0426927	0.995556	-5.71981
AC024475.1	0.371499	0.200331	2.1285	0.038115	0.995556	-5.62098
RP11-135A1.2	0.367595	1.18995	2.067	0.0437932	0.995556	-5.74191
TWIST2	0.3654	1.97643	2.12402	0.038505	0.995556	-5.62987
RP11-19J3.5	0.3628	0.167442	2.26896	0.0275022	0.995556	-5.33372
MIR3188	0.351736	0.360909	2.08436	0.0421198	0.995556	-5.70807
SCARNA17	0.348539	0.276269	2.20072	0.0322782	0.995556	-5.47518
AC024568.1	0.343939	0.159257	2.04075	0.0464323	0.995556	-5.79261
RP11-473I1.9	0.343147	0.60503	2.08753	0.0418208	0.995556	-5.70187
CASC19	0.342381	0.62634	2.11738	0.0390906	0.995556	-5.64305
UGT1A1	0.341844	0.710913	2.68073	0.00985195	0.995556	-4.40772
MIR5690	0.334152	0.264378	2.0853	0.0420309	0.995556	-5.70623
AGBL5-IT1	0.332712	1.04482	2.7648	0.00789253	0.995556	-4.20418
CTD-3025N20.3	0.328279	1.25627	2.37588	0.0212753	0.995556	-5.10504
AKR1B15	0.326354	1.11805	2.08325	0.0422256	0.995556	-5.71025
RNU6-677P	0.324721	0.211757	2.10047	0.0406176	0.995556	-5.67646
CD207	0.323319	0.830064	2.07606	0.042913	0.995556	-5.72428
AC116407.1	0.317526	0.252972	2.49021	0.0160428	0.995556	-4.85121
MROH7	0.316378	1.08468	2.22184	0.030727	0.995556	-5.43177
RNU6-912P	0.307735	0.143545	2.38863	0.020624	0.995556	-5.0772
RP11-385F5.5	0.301914	1.33329	2.51122	0.0152191	0.995556	-4.80357
AC092332.1	0.300017	0.140196	2.04635	0.0458584	0.995556	-5.78185
RP11-435O5.4	0.299764	0.723726	2.89683	0.00552769	0.995556	-3.87518
RNA5SP104	0.292083	0.136753	2.08723	0.041849	0.995556	-5.70246
RNU6-580P	0.289757	0.135743	2.08677	0.041892	0.995556	-5.70335
PI16	0.289746	0.592956	2.32164	0.0242562	0.995556	-5.22212
CDK15	0.283452	0.591251	2.29809	0.0256627	0.995556	-5.27227
RP11-343H5.4	0.283025	0.363675	2.58087	0.0127544	0.995556	-4.64332
MIR5094	0.282749	0.232352	2.03567	0.0469586	0.995556	-5.80235
XXbac-BPG13B8.10	0.279208	0.439903	2.82769	0.00666898	0.995556	-4.04888
AC007319.1	0.27884	0.454359	2.48184	0.0163823	0.995556	-4.87012
RP13-270P17.3	0.278025	1.09223	2.58827	0.0125152	0.995556	-4.6261
RP1-59D14.10	0.273916	0.30794	2.18152	0.0337472	0.995556	-5.51433
MIR937	0.269186	0.126817	2.27467	0.0271327	0.995556	-5.32172
RNU6-519P	0.269157	0.126804	2.31556	0.0246128	0.995556	-5.23511
MIR874	0.267635	0.126143	2.07353	0.0431576	0.995556	-5.72922
RP11-731D1.3	0.26727	0.161454	2.46148	0.0172351	0.995556	-4.9159
HSPA12A	0.26399	1.04216	2.24634	0.029011	0.995556	-5.38101
TRAV30	-0.264663	0.569929	-2.33755	0.0233455	0.995556	-5.18801
PGLYRP4	-0.265981	0.454307	-2.79033	0.00737272	0.995556	-4.14143
ADAMTS5	-0.266056	0.792785	-2.18169	0.0337343	0.995556	-5.51399
GRIN3A	-0.267575	0.733217	-2.13209	0.0378037	0.995556	-5.61381
ANKRD20A1	-0.267993	0.592738	-2.22017	0.0308473	0.995556	-5.43522
C11orf45	-0.268208	0.621814	-3.41151	0.00126692	0.995556	-2.49253
CTC-552D5.1	-0.269775	1.32839	-2.16925	0.034717	0.995556	-5.53921
C22orf23	-0.275098	1.22447	-2.082	0.042344	0.995556	-5.71268
C18orf54	-0.275927	1.20722	-2.24745	0.0289351	0.995556	-5.37869
RP11-297N6.4	-0.277728	0.638878	-3.28656	0.00183298	0.995556	-2.84198
AC239798.1	-0.277938	0.197296	-2.22955	0.0301778	0.995556	-5.41585
CTB-175E5.7	-0.278769	1.18124	-2.45298	0.0176026	0.995556	-4.9349
AP005901.1	-0.278999	0.918925	-2.13332	0.0376979	0.995556	-5.61136
NEK11	-0.285798	1.62086	-2.16756	0.0348525	0.995556	-5.54262
FSD1L	-0.288302	1.39867	-2.11503	0.0393004	0.995556	-5.64772
RP11-466C23.5	-0.292286	0.536576	-2.28613	0.0264041	0.995556	-5.29757
AC126544.4	-0.295318	0.70917	-2.14662	0.0365697	0.995556	-5.58478
XXbac-BPG170G13.32	-0.297482	0.31521	-2.72693	0.0087259	0.995556	-4.29644
OVOL1-AS1	-0.299014	0.862387	-2.41474	0.0193462	0.995556	-5.01984
CTB-159G17.4	-0.300427	0.357855	-2.60926	0.0118585	0.995556	-4.57703
ZNF501	-0.300672	1.28696	-2.31525	0.0246306	0.995556	-5.23576
RP11-550I24.2	-0.301303	0.792923	-3.76596	0.00042834	0.995556	-1.45815
RP4-612B15.3	-0.30219	1.58525	-2.41373	0.0193943	0.995556	-5.02207
RP11-241F15.9	-0.305373	0.2085	-2.59523	0.012294	0.995556	-4.60987
TCAF1P1	-0.306587	1.09731	-2.13367	0.0376679	0.995556	-5.61067
AC010761.13	-0.306729	0.788261	-2.02688	0.0478825	0.995556	-5.81919
NME5	-0.30806	1.2571	-2.35198	0.0225458	0.995556	-5.1569
RP11-90D4.4	-0.309335	0.266015	-2.70447	0.00925777	0.995556	-4.35073
LMLN	-0.315028	1.78906	-2.14432	0.0367625	0.995556	-5.58938
ALG10	-0.316792	1.91847	-2.12162	0.0387162	0.995556	-5.63465
RP11-218L14.4	-0.319627	0.887586	-2.39498	0.0203066	0.995556	-5.06331
KIF18A	-0.320048	1.76277	-2.15592	0.0357977	0.995556	-5.56609
RNU6-182P	-0.322033	0.192283	-2.07404	0.043108	0.995556	-5.72822
FCGR1C	-0.322099	0.597374	-2.34239	0.0230741	0.995556	-5.17758
TRGV3	-0.326282	0.899229	-2.18879	0.033184	0.995556	-5.49953
WDR11-AS1	-0.326321	0.537625	-2.21398	0.0312967	0.995556	-5.44797
RSC1A1	-0.329012	0.325849	-2.6474	0.0107457	0.995556	-4.48713
VWA3B	-0.330486	1.17211	-2.33455	0.0235149	0.995556	-5.19446
ZNF324	-0.332193	2.39963	-2.19583	0.032647	0.995556	-5.48518
GPR141	-0.333616	1.46692	-2.01735	0.0489006	0.995556	-5.83735
RN7SL317P	-0.335165	0.83812	-2.19659	0.0325896	0.995556	-5.48363
KIF14	-0.336172	1.26216	-2.57112	0.0130761	0.995556	-4.66596
MKLN1-AS	-0.33851	1.70232	-2.19935	0.0323807	0.995556	-5.47797
BCO1	-0.339213	1.61031	-2.08317	0.0422326	0.995556	-5.71039
UBL7-AS1	-0.339994	2.19322	-2.14615	0.0366092	0.995556	-5.58572
RP11-277P12.20	-0.343509	1.13656	-2.71014	0.00912079	0.995556	-4.33706
KIAA0895	-0.347954	1.30089	-2.67262	0.010063	0.995556	-4.42712
CCDC150	-0.351247	1.76319	-2.11407	0.0393858	0.995556	-5.64961
CTB-50E14.5	-0.359954	1.71606	-2.26006	0.0280876	0.995556	-5.35238
RNA5SP378	-0.362857	0.215391	-2.04174	0.0463311	0.995556	-5.79072
RP11-242C19.2	-0.362887	0.804006	-2.26178	0.0279736	0.995556	-5.34878
CD244	-0.365373	1.59725	-2.46094	0.0172583	0.995556	-4.91711
RP11-146D12.2	-0.365389	0.816558	-2.40812	0.0196631	0.995556	-5.03442
AC013477.1	-0.365684	0.247663	-2.0619	0.0442954	0.995556	-5.7518
CCR10	-0.368784	2.0316	-2.10744	0.0399821	0.995556	-5.66272
CC2D2A	-0.369247	2.44342	-2.02334	0.0482581	0.995556	-5.82594
CCDC60	-0.370073	1.16357	-2.15473	0.035896	0.995556	-5.56849
DDIAS	-0.370735	2.01356	-2.05732	0.0447512	0.995556	-5.76067
FAM200A	-0.372434	3.07388	-2.19653	0.0325934	0.995556	-5.48373
NUP62CL	-0.372882	2.09471	-2.12891	0.0380789	0.995556	-5.62015
CTC-512J14.1	-0.374274	0.549054	-2.01358	0.0493082	0.995556	-5.84451
PROX1	-0.378568	1.48377	-2.02717	0.0478517	0.995556	-5.81863
CDKL5	-0.379053	1.64263	-2.31967	0.024371	0.995556	-5.22632
RNU5A-2P	-0.379737	0.224945	-2.05204	0.0452808	0.995556	-5.77087
AC083900.1	-0.380035	1.2908	-2.68445	0.00975671	0.995556	-4.39883
RP11-64K12.4	-0.380232	0.8025	-2.12175	0.0387051	0.995556	-5.6344
AC016597.1	-0.380817	0.225557	-2.20613	0.0318745	0.995556	-5.46409
CKAP2L	-0.388356	2.2913	-2.1015	0.0405233	0.995556	-5.67444
IGHVII-26-2	-0.393082	0.569967	-2.54726	0.0138945	0.995556	-4.72108
CPNE7	-0.397744	1.08087	-2.23934	0.0294926	0.995556	-5.39556
CDC25C	-0.400811	2.37817	-2.08663	0.0419056	0.995556	-5.70363
RP11-844P9.2	-0.401041	1.77257	-2.04215	0.0462884	0.995556	-5.78992
AK7	-0.40326	1.68655	-2.52655	0.0146422	0.995556	-4.76859
MYO7A	-0.40446	1.90453	-2.53681	0.0142672	0.995556	-4.74508
RP5-994D16.9	-0.406957	2.01417	-2.49001	0.0160508	0.995556	-4.85166
PDCD1LG2	-0.409265	2.02485	-2.01858	0.0487682	0.995556	-5.83501
MIR4298	-0.410717	0.317695	-2.09077	0.0415165	0.995556	-5.69552
MRPS31P4	-0.414304	1.9887	-2.04713	0.0457788	0.995556	-5.78034
PLCH1	-0.417998	1.80912	-2.16062	0.0354135	0.995556	-5.55663
RP11-19N8.4	-0.422221	1.35909	-2.39612	0.0202501	0.995556	-5.06081
CCSAP	-0.423219	2.33233	-2.2052	0.0319434	0.995556	-5.466
ATP6V1E2	-0.424409	2.39457	-2.36574	0.0218063	0.995556	-5.1271
RP11-412H8.2	-0.428001	0.871348	-2.08824	0.0417534	0.995556	-5.70047
GS1-114I9.3	-0.433324	1.16842	-2.09388	0.0412262	0.995556	-5.68941
RP11-304C12.5	-0.434288	1.02012	-2.44573	0.0179219	0.995556	-4.95109
LAMP5	-0.434623	1.40049	-2.15633	0.0357639	0.995556	-5.56526
RP11-37L2.1	-0.439997	1.05834	-2.13323	0.0377062	0.995556	-5.61155
AC017116.11	-0.44092	1.40175	-2.21083	0.0315271	0.995556	-5.45444
RP11-244H3.4	-0.442748	1.15133	-3.20988	0.00229114	0.995556	-3.05225
FAM25BP	-0.442845	0.768836	-2.06124	0.0443605	0.995556	-5.75307
MYRIP	-0.445703	1.86084	-2.65477	0.0105418	0.995556	-4.46962
CYSLTR2	-0.447505	1.53521	-2.43718	0.018305	0.995556	-4.97012
CDADC1	-0.449799	3.09894	-2.62495	0.0113886	0.995556	-4.54017
CTB-91J4.1	-0.451056	1.16373	-2.26325	0.0278769	0.995556	-5.34571
FAM122C	-0.451844	2.36283	-2.32408	0.0241143	0.995556	-5.21689
RNU6-228P	-0.452147	0.315332	-2.05915	0.0445688	0.995556	-5.75713
GIF	-0.452217	0.702675	-3.25549	0.00200708	0.995556	-2.92758
CKLF-CMTM1	-0.458273	1.74185	-2.0471	0.0457815	0.995556	-5.78039
NPIPA2	-0.463714	0.718655	-2.74677	0.00827957	0.995556	-4.24821
FBXL20	-0.464446	2.53716	-2.28123	0.0267139	0.995556	-5.30792
GCSHP3	-0.467691	1.08158	-2.27897	0.0268574	0.995556	-5.31268
ZNF426	-0.473307	2.24284	-2.48903	0.0160906	0.995556	-4.8539
AL445232.1	-0.488856	0.334937	-2.24026	0.0294288	0.995556	-5.39365
CTD-2561J22.5	-0.490961	2.2625	-2.08307	0.0422427	0.995556	-5.7106
ACVR1C	-0.492219	1.55087	-2.10543	0.0401646	0.995556	-5.66669
UHRF1BP1	-0.496565	2.63662	-2.08425	0.0421308	0.995556	-5.70829
UBASH3B	-0.50138	2.02839	-2.26978	0.0274495	0.995556	-5.33201
PHF13	-0.50155	3.47828	-2.17315	0.0344063	0.995556	-5.53132
GDPD1	-0.505887	2.20398	-2.43845	0.0182477	0.995556	-4.9673
CENPI	-0.509037	2.36943	-2.19938	0.0323786	0.995556	-5.47791
AP4E1	-0.509066	2.79397	-2.17592	0.0341869	0.995556	-5.5257
CYP4X1	-0.51071	1.36158	-3.07217	0.00339585	0.995556	-3.42142
AP002495.1	-0.511453	0.514162	-2.00908	0.0497996	0.995556	-5.85306
CCNF	-0.511737	3.42903	-2.20834	0.0317104	0.995556	-5.45955
EXOC3L1	-0.523416	2.87922	-2.28464	0.0264979	0.995556	-5.30072
LINC01137	-0.533551	3.19618	-2.59662	0.0122501	0.995556	-4.60661
MIR598	-0.534747	0.312687	-2.10779	0.0399505	0.995556	-5.66203
NCALD	-0.536464	3.42073	-2.06726	0.0437672	0.995556	-5.74139
CD226	-0.537169	2.02431	-2.13173	0.0378353	0.995556	-5.61454
RP11-809O17.1	-0.545896	2.52535	-2.05657	0.0448258	0.995556	-5.76212
SLC8A1	-0.54877	2.00211	-2.19918	0.0323941	0.995556	-5.47834
RNVU1-19	-0.553333	0.454782	-2.21149	0.0314788	0.995556	-5.45309
TBC1D31	-0.555008	3.21362	-2.6858	0.00972211	0.995556	-4.39557
RFX7	-0.555015	2.63298	-2.03374	0.0471607	0.995556	-5.80607
CDCA2	-0.555522	2.51158	-2.68836	0.0096573	0.995556	-4.38945
FAM72A	-0.556242	2.158	-3.23739	0.00211557	0.995556	-2.97719
CTC-436P18.3	-0.557191	1.60958	-2.28499	0.0264762	0.995556	-5.29999
USP42	-0.561311	3.71796	-2.2384	0.0295574	0.995556	-5.3975
TRAV29DV5	-0.56389	1.59054	-2.52377	0.0147452	0.995556	-4.77493
VCPIP1	-0.569419	3.73207	-2.03518	0.0470105	0.995556	-5.80331
ARL11	-0.573966	1.82143	-2.03043	0.0475079	0.995556	-5.81241
MIR4648	-0.575817	0.73471	-2.06691	0.0438017	0.995556	-5.74208
SLC24A1	-0.584674	3.32653	-2.33077	0.0237298	0.995556	-5.20257
TRAV3	-0.587268	1.20267	-2.19825	0.0324637	0.995556	-5.48022
AC017028.6	-0.588987	0.343389	-2.21358	0.0313258	0.995556	-5.44879
SGOL2	-0.591573	3.24888	-2.32071	0.0243102	0.995556	-5.2241
CENPO	-0.594382	4.4168	-2.20637	0.0318568	0.995556	-5.46361
RP11-88H9.2	-0.59763	1.14973	-3.13159	0.00286886	0.995556	-3.26348
LILRA6	-0.600425	1.66284	-2.44231	0.0180742	0.995556	-4.9587
IL18RAP	-0.604818	2.12591	-2.04626	0.0458678	0.995556	-5.78202
AC234775.1	-0.605153	0.4848	-2.40458	0.0198345	0.995556	-5.04221
FAM149A	-0.60754	5.1438	-2.1471	0.0365293	0.995556	-5.58381
CENPE	-0.60896	2.41507	-2.79965	0.00719104	0.995556	-4.11843
SKA1	-0.610411	2.71875	-2.86595	0.0060129	0.995556	-3.95312
DEPDC1	-0.614531	3.2863	-2.15249	0.0360809	0.995556	-5.57299
CASC5	-0.615126	3.1501	-2.2929	0.0259824	0.995556	-5.28327
ANKRD50	-0.619482	3.29662	-2.01237	0.0494401	0.995556	-5.84681
PGM2L1	-0.621818	3.22768	-2.09107	0.0414883	0.995556	-5.69493
ABCA12	-0.622653	1.35395	-2.01314	0.0493564	0.995556	-5.84535
RP11-264I13.2	-0.624813	3.23228	-2.16287	0.0352303	0.995556	-5.55208
RNVU1-3	-0.631426	1.1847	-2.33159	0.0236827	0.995556	-5.2008
KIF18B	-0.638683	3.46735	-2.04764	0.0457271	0.995556	-5.77936
HTR4	-0.640856	2.01497	-2.20045	0.032298	0.995556	-5.47572
KIF4A	-0.642916	3.40053	-2.3182	0.0244573	0.995556	-5.22947
TMEM229B	-0.643272	2.98026	-2.58385	0.0126575	0.995556	-4.63638
RNU6-1266P	-0.654916	0.380707	-2.3454	0.0229073	0.995556	-5.1711
SLC25A48	-0.656977	3.00082	-2.02222	0.0483776	0.995556	-5.82807
FBXO33	-0.657161	4.66932	-2.02056	0.0485554	0.995556	-5.83124
SMARCAL1	-0.658379	6.42167	-2.2066	0.0318393	0.995556	-5.46312
PPM1L	-0.658533	2.57423	-2.31929	0.0243933	0.995556	-5.22714
RN7SL398P	-0.65986	3.37116	-2.14481	0.036721	0.995556	-5.58839
TRAF3IP1	-0.665574	4.23252	-2.17392	0.034345	0.995556	-5.52975
RSPH3	-0.675543	3.59026	-2.24508	0.0290972	0.995556	-5.38363
CTD-2538G9.6	-0.67807	1.46872	-2.4725	0.0167688	0.995556	-4.89116
DEPDC1B	-0.683946	4.30654	-2.2547	0.0284451	0.995556	-5.36358
AGTPBP1	-0.687395	4.06586	-2.31672	0.024544	0.995556	-5.23262
ZNF268	-0.693617	3.88649	-2.15109	0.0361965	0.995556	-5.5758
WARS2	-0.696812	5.28856	-2.50588	0.0154245	0.995556	-4.81569
TULP4	-0.696826	3.60632	-2.02784	0.0477806	0.995556	-5.81735
STAT4	-0.699165	3.92748	-2.09331	0.0412797	0.995556	-5.69054
GDAP2	-0.705486	5.44144	-2.24533	0.0290802	0.995556	-5.38311
STX11	-0.705486	3.09974	-2.01873	0.048752	0.995556	-5.83472
KIAA1524	-0.707122	3.36287	-2.22162	0.0307428	0.995556	-5.43223
ING2	-0.707976	6.73459	-2.1309	0.0379069	0.995556	-5.6162
PRIM2	-0.709167	6.10833	-2.09989	0.0406709	0.995556	-5.6776
ZFYVE26	-0.709397	4.37413	-2.07707	0.0428154	0.995556	-5.7223
KIF15	-0.712937	3.59199	-2.47866	0.0165131	0.995556	-4.8773
AMMECR1	-0.73092	4.75594	-2.4979	0.0157367	0.995556	-4.83381
ALDH1L2	-0.73642	2.21375	-2.05631	0.0448521	0.995556	-5.76263
RP11-529K1.3	-0.737945	1.30031	-2.20038	0.0323035	0.995556	-5.47587
E2F3	-0.738079	5.03623	-2.12828	0.0381338	0.995556	-5.62141
AC073873.1	-0.741402	0.873246	-2.13842	0.0372616	0.995556	-5.60118
PLXDC2	-0.743342	4.41531	-2.13664	0.0374137	0.995556	-5.60475
NXT2	-0.754789	5.40361	-2.28599	0.0264131	0.995556	-5.29787
RGS18	-0.756541	3.14596	-2.32424	0.0241051	0.995556	-5.21655
IL19	-0.756841	1.39628	-2.016	0.0490464	0.995556	-5.83992
TRGJP1	-0.757871	1.10734	-2.17046	0.0346204	0.995556	-5.53676
CTBP1-AS2	-0.758663	4.90791	-2.03196	0.0473472	0.995556	-5.80948
RP13-580F15.2	-0.758729	3.19942	-2.61235	0.0117646	0.995556	-4.56978
SPATA6	-0.760444	2.75809	-2.85432	0.00620571	0.995556	-3.98233
FBXO5	-0.760959	5.53398	-2.16232	0.0352753	0.995556	-5.5532
GINS4	-0.766572	2.55188	-3.03834	0.00373519	0.995556	-3.51043
F11-AS1	-0.768184	1.08218	-2.79943	0.00719528	0.995556	-4.11898
IQCK	-0.768377	5.96836	-2.17004	0.0346536	0.995556	-5.5376
C1orf95	-0.772361	1.45248	-2.57505	0.0129456	0.995556	-4.65684
TTC8	-0.777839	6.51599	-2.01599	0.0490472	0.995556	-5.83993
NAV2	-0.785837	2.93435	-2.41734	0.0192227	0.995556	-5.01409
RP11-61L23.2	-0.798698	2.72408	-3.5047	0.000957508	0.995556	-2.22657
TRAV2	-0.799588	1.80866	-2.54435	0.0139973	0.995556	-4.72776
TLR8	-0.818092	2.63195	-2.46667	0.0170138	0.995556	-4.90424
RNA5SP155	-0.818257	1.02427	-2.05047	0.0454394	0.995556	-5.7739
DSN1	-0.819079	8.54658	-2.11458	0.0393398	0.995556	-5.6486
TRIM39	-0.82165	5.09697	-2.33118	0.0237062	0.995556	-5.20168
RSPH1	-0.824721	3.70235	-2.68265	0.00980267	0.995556	-4.40313
NDUFV2P1	-0.828454	4.49443	-2.02593	0.0479834	0.995556	-5.82101
AC025918.1	-0.831055	1.57003	-2.13166	0.0378414	0.995556	-5.61468
CTA-384D8.35	-0.833632	2.23662	-2.69114	0.0095873	0.995556	-4.38278
BLOC1S5-TXNDC5	-0.838316	1.84251	-2.41423	0.0193703	0.995556	-5.02096
GRAMD1C	-0.839404	3.66448	-2.2251	0.0304941	0.995556	-5.42506
LMNTD2	-0.842606	4.40831	-2.0958	0.0410478	0.995556	-5.68564
LRRC8B	-0.842938	4.38692	-2.16485	0.0350704	0.995556	-5.54809
RNU4-89P	-0.849197	1.35761	-2.07629	0.0428905	0.995556	-5.72382
PTPN4	-0.85016	5.08267	-2.18134	0.0337612	0.995556	-5.51469
AKAP5	-0.866122	3.5677	-2.94381	0.0048588	0.995556	-3.75545
DIAPH2	-0.873019	5.61681	-2.05445	0.0450388	0.995556	-5.76623
RNF24	-0.874739	4.10184	-2.16803	0.0348149	0.995556	-5.54168
CEP41	-0.875184	4.17464	-3.04525	0.00366345	0.995556	-3.49232
SRBD1	-0.8786	5.95191	-2.19739	0.0325289	0.995556	-5.48199
GATB	-0.878652	7.74183	-2.54417	0.0140038	0.995556	-4.72818
TK2	-0.879771	8.00245	-2.06719	0.0437742	0.995556	-5.74153
TTK	-0.88163	4.46755	-2.55221	0.0137209	0.995556	-4.70966
RAP2B	-0.882045	6.92938	-2.1351	0.0375456	0.995556	-5.60782
IFT140	-0.893153	4.50766	-2.25551	0.0283909	0.995556	-5.36189
SAP130	-0.893229	7.03362	-2.24773	0.0289163	0.995556	-5.37811
RP11-322E11.2	-0.897137	3.55804	-2.32874	0.0238459	0.995556	-5.20692
IFFO2	-0.899567	3.69439	-2.23318	0.0299217	0.995556	-5.40832
RP11-484D2.4	-0.902653	2.04297	-2.38852	0.0206295	0.995556	-5.07744
JPH1	-0.90506	4.79611	-2.09235	0.041369	0.995556	-5.69242
PDCL	-0.918748	8.21801	-2.08509	0.042051	0.995556	-5.70664
CTD-2514C3.1	-0.920528	3.50846	-2.24342	0.0292111	0.995556	-5.38708
ASPM	-0.923522	3.62964	-3.25644	0.00200153	0.995556	-2.92497
BCAS3	-0.923693	5.80675	-2.13749	0.0373412	0.995556	-5.60305
MTF1	-0.931768	4.17995	-2.62067	0.0115152	0.995556	-4.55025
RIMS3	-0.93952	3.35162	-2.51554	0.0150544	0.995556	-4.79372
NOCT	-0.94092	3.3211	-2.28128	0.0267103	0.995556	-5.3078
DEPTOR	-0.942014	4.47033	-2.14239	0.0369253	0.995556	-5.59325
ELP4	-0.942683	7.16478	-2.88838	0.00565684	0.995556	-3.89659
NUF2	-0.943762	5.54667	-2.12205	0.0386781	0.995556	-5.63379
DOCK4	-0.944182	3.80206	-2.48458	0.0162704	0.995556	-4.86393
GMDS-AS1	-0.950375	5.68681	-2.13218	0.0377964	0.995556	-5.61364
FIG4	-0.951461	7.10669	-2.45851	0.0173628	0.995556	-4.92255
AC009133.22	-0.95875	2.41977	-2.18569	0.0334232	0.995556	-5.50585
CHEK1	-0.961765	7.66136	-2.09834	0.0408137	0.995556	-5.68066
MXD3	-0.964017	8.23554	-2.01547	0.0491041	0.995556	-5.84093
RCAN3	-0.967812	6.0278	-2.28772	0.0263048	0.995556	-5.29422
DLGAP5	-0.971466	5.58443	-2.1827	0.0336551	0.995556	-5.51192
STIL	-0.972026	4.70471	-2.44667	0.0178803	0.995556	-4.949
CXorf38	-0.985444	7.80828	-2.0513	0.0453554	0.995556	-5.77229
FAM83D	-0.98807	5.40453	-2.42141	0.0190314	0.995556	-5.0051
LIN54	-0.991604	5.12297	-2.29511	0.0258455	0.995556	-5.27858
REST	-1.00474	5.91202	-2.01719	0.0489184	0.995556	-5.83766
ESCO2	-1.00928	3.95124	-2.30989	0.0249491	0.995556	-5.24719
ACTR8	-1.00957	9.06077	-2.06464	0.0440253	0.995556	-5.74649
LDAH	-1.02034	7.54779	-2.19692	0.0325644	0.995556	-5.48295
TXNL4B	-1.02068	5.61129	-2.94618	0.00482723	0.995556	-3.74939
MICALL1	-1.02241	7.92481	-2.1902	0.0330759	0.995556	-5.49666
MTNR1A	-1.02335	2.06618	-3.1545	0.00268696	0.995556	-3.20202
ARSB	-1.02412	4.96251	-2.85548	0.00618622	0.995556	-3.97942
PCNT	-1.03086	7.18348	-2.20681	0.0318242	0.995556	-5.4627
UHRF1BP1L	-1.03608	6.06833	-2.48386	0.0162997	0.995556	-4.86556
VARS2	-1.037	9.8979	-2.06206	0.0442796	0.995556	-5.75149
CLEC12A	-1.04034	2.53138	-2.704	0.00926908	0.995556	-4.35185
DCP1A	-1.04169	6.24242	-2.22518	0.0304878	0.995556	-5.42487
CDKN2C	-1.04637	7.32539	-2.67824	0.00991627	0.995556	-4.41368
AC004846.1	-1.04992	1.38486	-3.428	0.00120603	0.995556	-2.44581
KIF20A	-1.05587	4.41905	-2.6313	0.0112033	0.995556	-4.5252
KIAA0513	-1.05594	6.63951	-2.15999	0.0354647	0.995556	-5.5579
FRK	-1.0698	4.66262	-2.59027	0.0124514	0.995556	-4.62144
ATL1	-1.07073	4.46433	-2.97315	0.00448019	0.995556	-3.67999
PIF1	-1.07284	5.24777	-2.23328	0.0299147	0.995556	-5.40812
SHCBP1	-1.08341	4.03749	-2.46815	0.0169513	0.995556	-4.90093
ISCA1P1	-1.08416	2.49738	-2.15438	0.0359244	0.995556	-5.56919
UPF2	-1.08616	9.2733	-2.13659	0.0374181	0.995556	-5.60485
pRNA	-1.08621	1.41598	-2.82772	0.00666831	0.995556	-4.04878
GTSE1	-1.09141	4.89645	-2.79188	0.0073423	0.995556	-4.13762
RP11-332M2.1	-1.09932	9.20004	-2.34726	0.0228046	0.995556	-5.16709
PANX1	-1.10027	5.58959	-2.06933	0.0435654	0.995556	-5.73738
GPC4	-1.10999	6.41263	-2.25044	0.0287324	0.995556	-5.37247
HS2ST1	-1.11088	6.71011	-2.20744	0.031777	0.995556	-5.4614
DYNC2LI1	-1.11163	10.7347	-2.07369	0.0431419	0.995556	-5.7289
RAB11FIP5	-1.12246	7.34165	-2.11653	0.0391662	0.995556	-5.64474
UBTD2	-1.1256	10.4963	-2.01872	0.0487535	0.995556	-5.83475
ITGA8	-1.1272	5.03397	-2.17885	0.033956	0.995556	-5.51975
INPP4B	-1.12909	3.85424	-3.12642	0.00291148	0.995556	-3.27731
ANLN	-1.13071	6.17975	-2.14887	0.0363814	0.995556	-5.58026
PRRG4	-1.13478	6.3401	-2.31548	0.0246173	0.995556	-5.23528
ARAP2	-1.14122	5.04181	-2.31612	0.0245797	0.995556	-5.23392
LINC01184	-1.14216	11.1735	-2.19048	0.0330543	0.995556	-5.49609
LMBRD2	-1.15271	5.07378	-2.20437	0.0320051	0.995556	-5.4677
MTMR6	-1.15822	7.70757	-2.14615	0.0366091	0.995556	-5.58572
IPMK	-1.16428	5.79843	-2.45069	0.0177031	0.995556	-4.94003
ZNF148	-1.16774	6.69686	-2.16927	0.0347153	0.995556	-5.53916
LRRC16A	-1.16837	10.3921	-2.07431	0.0430814	0.995556	-5.72768
AP001052.1	-1.17556	1.63048	-2.07544	0.0429728	0.995556	-5.72549
IFIT5	-1.17659	6.07215	-2.28983	0.0261727	0.995556	-5.28975
APPBP2	-1.1832	7.76028	-2.02102	0.0485064	0.995556	-5.83037
IGHV1OR21-1	-1.20379	2.19062	-2.16464	0.0350873	0.995556	-5.54852
RAD51AP1	-1.20483	6.71037	-2.06408	0.0440805	0.995556	-5.74758
RBBP8	-1.20728	10.3069	-2.16897	0.034739	0.995556	-5.53976
CPEB2	-1.21676	6.02991	-2.02243	0.048356	0.995556	-5.82768
IL7	-1.21947	5.83345	-2.43118	0.0185785	0.995556	-4.98346
COG6	-1.2255	9.29013	-2.04234	0.0462685	0.995556	-5.78955
MIB1	-1.22674	6.19288	-2.07807	0.0427196	0.995556	-5.72036
PTPRG	-1.22953	5.75415	-2.20201	0.0321817	0.995556	-5.47254
INIP	-1.23078	10.1435	-2.11306	0.0394761	0.995556	-5.65161
CDK5RAP2	-1.23768	9.91182	-2.06019	0.0444654	0.995556	-5.75512
FAM69A	-1.241	9.50546	-2.01068	0.0496242	0.995556	-5.85001
XXbac-BPG116M5.17	-1.24562	2.80006	-2.858	0.00614417	0.995556	-3.97311
ADCK4	-1.24787	12.1858	-2.08616	0.0419494	0.995556	-5.70454
KIF1B	-1.25737	6.18853	-2.14867	0.0363979	0.995556	-5.58066
RP2	-1.25785	8.31419	-2.10968	0.0397796	0.995556	-5.65829
CDCA8	-1.2589	8.44143	-2.36741	0.0217182	0.995556	-5.12347
MGAM2	-1.26043	2.91742	-2.61632	0.0116448	0.995556	-4.56045
AZIN2	-1.26539	3.68118	-2.92773	0.00507875	0.995556	-3.79658
NDC80	-1.27228	7.24005	-2.45088	0.0176947	0.995556	-4.9396
AP002022.1	-1.27669	0.91464	-2.55877	0.013494	0.995556	-4.69453
FGD6	-1.28239	4.97258	-2.38546	0.0207844	0.995556	-5.08414
ETV3	-1.28861	7.30901	-2.03439	0.0470928	0.995556	-5.80482
HFE	-1.29375	4.40114	-3.03953	0.0037227	0.995556	-3.5073
RNF170	-1.30158	9.0237	-2.07061	0.0434406	0.995556	-5.73489
GPRIN3	-1.31277	5.39595	-2.26206	0.0279549	0.995556	-5.34818
SMC2	-1.31536	6.97879	-2.0809	0.0424494	0.995556	-5.71484
ZC3H12C	-1.31629	4.21277	-2.62478	0.0113935	0.995556	-4.54056
MRC1	-1.31849	5.96406	-2.03289	0.0472497	0.995556	-5.8077
CMKLR1	-1.32606	6.14674	-2.34181	0.0231067	0.995556	-5.17883
OTULIN	-1.34355	6.9261	-2.37835	0.0211479	0.995556	-5.09967
CCSER2	-1.34727	7.69019	-2.08365	0.0421874	0.995556	-5.70946
REL	-1.34999	4.20128	-2.04964	0.0455238	0.995556	-5.77551
HPS3	-1.35968	9.37814	-2.06903	0.0435948	0.995556	-5.73797
AC087433.1	-1.38091	2.21573	-2.28606	0.0264088	0.995556	-5.29773
KIF23	-1.38195	7.06794	-2.80804	0.00703095	0.995556	-4.09767
AURKA	-1.38602	9.31272	-2.36405	0.0218956	0.995556	-5.13075
PRR11	-1.39056	5.4412	-3.0081	0.00406512	0.995556	-3.58942
MZT1	-1.39158	8.43531	-3.07781	0.00334218	0.995556	-3.40652
BIRC5	-1.39187	9.47044	-2.05376	0.0451076	0.995556	-5.76755
FBXL17	-1.41055	6.87027	-2.44379	0.0180084	0.995556	-4.95542
CXCR6	-1.41237	6.61585	-2.06294	0.0441925	0.995556	-5.74978
RASGEF1B	-1.41398	7.18813	-2.40265	0.0199286	0.995556	-5.04646
KIFC1	-1.41418	9.44003	-2.21839	0.0309761	0.995556	-5.43889
GPN2	-1.4144	13.1789	-2.55364	0.013671	0.995556	-4.70636
RBMS2	-1.41618	7.22808	-2.49436	0.015877	0.995556	-4.84183
BMPR1A	-1.42277	6.11595	-2.5871	0.0125528	0.995556	-4.62882
MRAP2	-1.42756	5.57172	-2.70644	0.00920996	0.995556	-4.34598
MIR3142HG	-1.42908	5.01829	-2.12559	0.038368	0.995556	-5.62676
ARL15	-1.43093	8.94214	-2.03153	0.0473922	0.995556	-5.8103
LYPD5	-1.44449	3.28582	-2.42739	0.0187527	0.995556	-4.99185
RRAGC	-1.44483	13.2784	-2.31458	0.0246706	0.995556	-5.2372
NBPF10	-1.4457	6.36283	-2.2809	0.0267348	0.995556	-5.30862
GMCL1	-1.44725	9.69283	-2.02296	0.0482986	0.995556	-5.82666
GPSM2	-1.45346	9.89007	-2.07112	0.0433907	0.995556	-5.73389
SESN2	-1.45517	9.63994	-2.18681	0.033337	0.995556	-5.50358
ARMT1	-1.4618	12.5769	-2.26284	0.0279037	0.995556	-5.34656
KIF11	-1.46775	6.45005	-2.62039	0.0115234	0.995556	-4.55089
SNRPGP4	-1.479	3.06556	-2.38706	0.0207032	0.995556	-5.08064
NAMPTP1	-1.48344	3.488	-2.11127	0.0396365	0.995556	-5.65515
IKBKE	-1.48711	9.85816	-2.29809	0.0256628	0.995556	-5.27227
AGA	-1.48982	11.6517	-2.01117	0.0495707	0.995556	-5.84908
TRDV1	-1.49876	3.25814	-2.07418	0.0430945	0.995556	-5.72795
KDM5A	-1.49949	8.67915	-2.14998	0.0362887	0.995556	-5.57803
GTF2A1	-1.49988	9.11626	-2.21699	0.0310775	0.995556	-5.44178
KCNMA1	-1.50781	9.95528	-2.22881	0.0302298	0.995556	-5.41737
MBNL3	-1.50801	6.8036	-2.10859	0.0398782	0.995556	-5.66045
DHTKD1	-1.51011	7.31945	-2.52367	0.014749	0.995556	-4.77517
AC025156.1	-1.51231	1.75205	-2.6612	0.010367	0.995556	-4.45434
CKAP2	-1.51292	9.04457	-2.21461	0.0312507	0.995556	-5.44668
ARHGAP11A	-1.51791	7.3774	-2.20823	0.031719	0.995556	-5.45979
STAG1	-1.51922	10.0997	-2.24304	0.0292369	0.995556	-5.38786
RIT1	-1.52336	10.6534	-2.13306	0.0377208	0.995556	-5.61189
STRN	-1.52386	8.5654	-2.10369	0.0403231	0.995556	-5.67012
VSNL1	-1.5257	4.11316	-2.82732	0.00667559	0.995556	-4.04979
DLL4	-1.52915	7.43228	-2.11148	0.0396182	0.995556	-5.65475
NCOA2	-1.53814	7.57417	-2.15209	0.0361141	0.995556	-5.5738
KCNK6	-1.53896	13.6348	-2.2933	0.0259573	0.995556	-5.28241
GTF2E2	-1.54865	16.0006	-2.35885	0.0221735	0.995556	-5.14202
C1QTNF6	-1.55301	8.33144	-2.56256	0.0133645	0.995556	-4.68577
MTHFR	-1.56628	9.48291	-2.18782	0.0332589	0.995556	-5.50152
SLC2A13	-1.56944	7.27722	-2.14396	0.036793	0.995556	-5.59011
ALCAM	-1.57762	9.08829	-2.31928	0.0243942	0.995556	-5.22717
SLC30A7	-1.57925	8.14803	-2.44104	0.018131	0.995556	-4.96153
ARNTL	-1.58938	7.22068	-2.5331	0.0144019	0.995556	-4.75359
ACER3	-1.6132	10.514	-2.01965	0.0486527	0.995556	-5.83296
PLEKHS1	-1.62701	4.88705	-2.36227	0.0219906	0.995556	-5.13462
TRIP11	-1.63127	8.8364	-2.04813	0.0456769	0.995556	-5.77841
ITGB3BP	-1.6318	15.2045	-2.07352	0.0431583	0.995556	-5.72923
snoMe28S-Am2634	-1.64564	2.94682	-2.28172	0.0266828	0.995556	-5.30689
USP32	-1.65262	8.64714	-2.54195	0.0140827	0.995556	-4.73328
LIG3	-1.65411	9.28485	-2.46707	0.0169971	0.995556	-4.90336
SLC7A8	-1.66346	11.3189	-2.06577	0.0439143	0.995556	-5.7443
BUB1	-1.67073	7.4685	-2.65925	0.0104197	0.995556	-4.45897
PIGK	-1.67307	11.6127	-2.22535	0.0304758	0.995556	-5.42453
LSM12P1	-1.6751	5.15854	-2.1625	0.035261	0.995556	-5.55285
TPX2	-1.70539	10.0619	-2.50897	0.0153055	0.995556	-4.80869
ENPP4	-1.70709	9.59187	-2.35924	0.0221528	0.995556	-5.14119
CENPF	-1.71297	10.161	-2.02343	0.0482488	0.995556	-5.82577
CCDC125	-1.73348	8.50779	-2.73016	0.00865179	0.995556	-4.28861
MID1	-1.7436	7.93047	-2.48291	0.0163386	0.995556	-4.86771
PLXNC1	-1.77166	7.30685	-2.54233	0.0140692	0.995556	-4.7324
RAPH1	-1.78153	6.72175	-2.56982	0.0131196	0.995556	-4.66897
B4GALNT2	-1.78459	3.76087	-2.39276	0.0204168	0.995556	-5.06816
AC112219.1	-1.79232	2.13238	-2.73832	0.00846702	0.995556	-4.26878
FOXM1	-1.79478	10.9933	-2.25946	0.0281271	0.995556	-5.35362
SGPP1	-1.79952	10.6821	-2.21986	0.03087	0.995556	-5.43587
ALDH6A1	-1.80106	7.94231	-2.28625	0.0263969	0.995556	-5.29733
DYM	-1.80418	14.9574	-2.07765	0.0427597	0.995556	-5.72117
CCNA2	-1.81654	11.2398	-2.17537	0.0342304	0.995556	-5.52682
FZR1	-1.82624	13.4085	-2.27638	0.0270234	0.995556	-5.31814
CEP70	-1.83053	10.6083	-2.08657	0.0419109	0.995556	-5.70374
UBR2	-1.84801	10.7402	-2.22251	0.0306794	0.995556	-5.4304
ENAM	-1.85118	7.93014	-2.30125	0.0254697	0.995556	-5.26556
PPIL2	-1.85537	20.0733	-2.07998	0.0425367	0.995556	-5.71663
GEN1	-1.86466	7.85518	-2.34261	0.0230619	0.995556	-5.1771
ZNF562	-1.86593	7.68574	-2.37412	0.0213668	0.995556	-5.10888
N4BP1	-1.89415	15.9456	-2.01871	0.0487544	0.995556	-5.83477
CTBS	-1.89999	12.9279	-2.31207	0.024819	0.995556	-5.24254
INCENP	-1.92226	9.87682	-2.42876	0.0186898	0.995556	-4.98883
IL2RB	-1.92357	8.27202	-2.11361	0.0394268	0.995556	-5.65052
GRIN1	-1.93495	4.13442	-2.81059	0.0069829	0.995556	-4.09134
AMOT	-1.9417	4.64986	-2.95507	0.00471015	0.995556	-3.72656
SHOC2	-1.94492	19.8662	-2.07599	0.0429198	0.995556	-5.72442
3/1/2018	-1.95321	9.68164	-2.53485	0.0143383	0.995556	-4.74958
TRIM44	-1.96236	11.3285	-2.04662	0.0458303	0.995556	-5.78131
ABCC1	-1.96545	9.9183	-2.01925	0.0486956	0.995556	-5.83373
DBF4	-1.97074	9.57922	-2.88878	0.00565064	0.995556	-3.89557
IGSF6	-1.9899	9.35506	-2.20302	0.0321059	0.995556	-5.47047
DIRC2	-1.99259	12.9596	-2.12102	0.0387692	0.995556	-5.63584
C8orf76	-2.00145	17.4632	-2.67552	0.00998711	0.995556	-4.42019
TMEM62	-2.00534	15.441	-2.39575	0.020268	0.995556	-5.0616
GCH1	-2.01305	13.2399	-2.03509	0.0470194	0.995556	-5.80347
COG5	-2.01795	13.0633	-2.27585	0.0270574	0.995556	-5.31926
EIF2AK2	-2.02089	9.10123	-2.28675	0.0263653	0.995556	-5.29626
EXOC4	-2.0226	15.0343	-2.46491	0.0170887	0.995556	-4.9082
GALNT10	-2.03543	12.8541	-2.20149	0.0322201	0.995556	-5.47359
GANC	-2.0396	11.1796	-2.04644	0.0458493	0.995556	-5.78167
UFL1	-2.05534	13.6644	-2.05304	0.0451801	0.995556	-5.76894
AC067957.1	-2.05636	3.13158	-2.47808	0.0165366	0.995556	-4.87859
TBC1D5	-2.06559	8.87632	-2.11253	0.0395236	0.995556	-5.65266
PRUNE2	-2.08486	7.53832	-2.60213	0.0120782	0.995556	-4.59374
NOTCH2	-2.08775	8.42317	-2.39577	0.0202672	0.995556	-5.06156
KPNA4	-2.09215	12.6984	-2.34354	0.0230103	0.995556	-5.17511
FARP1	-2.09243	15.1056	-2.06796	0.0436989	0.995556	-5.74004
SAP30L	-2.09244	21.0279	-2.1729	0.0344259	0.995556	-5.53182
NPC1	-2.10465	14.3387	-2.06728	0.0437659	0.995556	-5.74137
ZER1	-2.1057	16.1278	-2.02635	0.0479387	0.995556	-5.8202
HTT	-2.12431	10.1304	-2.19426	0.0327661	0.995556	-5.48838
CSNK2A2	-2.142	16.8083	-2.50274	0.015547	0.995556	-4.82284
CTD-2510F5.4	-2.16326	8.07186	-2.6017	0.0120914	0.995556	-4.59474
PTPRJ	-2.17922	10.8425	-2.61467	0.0116945	0.995556	-4.56433
AC041039.1	-2.1871	2.06257	-2.58657	0.0125697	0.995556	-4.63005
CNOT6L	-2.19198	10.3468	-2.07008	0.0434922	0.995556	-5.73592
FOXO3	-2.19887	11.8949	-2.10493	0.0402098	0.995556	-5.66767
GPR107	-2.20367	15.1887	-2.09037	0.0415544	0.995556	-5.69631
PIGN	-2.20821	11.7936	-2.15427	0.035934	0.995556	-5.56942
TRIM26	-2.2178	19.3291	-2.03582	0.0469434	0.995556	-5.80207
PPP2R5E	-2.22536	14.7197	-2.10491	0.0402118	0.995556	-5.66771
ACPP	-2.22622	6.29509	-3.03855	0.00373297	0.995556	-3.50988
TMEM167B	-2.22892	17.8788	-2.06376	0.044112	0.995556	-5.7482
TPK1	-2.23064	11.1073	-2.14833	0.0364266	0.995556	-5.58135
KAT2B	-2.23178	9.96903	-2.30456	0.0252693	0.995556	-5.25853
TBC1D15	-2.26036	16.0928	-2.02888	0.0476705	0.995556	-5.81536
KIF13A	-2.27202	14.9935	-2.10008	0.0406536	0.995556	-5.67723
KCND3	-2.27374	5.27369	-3.31333	0.00169456	0.995556	-2.76784
ZNFX1	-2.28168	11.0662	-2.471	0.0168312	0.995556	-4.89452
RACGAP1	-2.29674	12.0978	-2.69853	0.00940316	0.995556	-4.36501
COG4	-2.30067	19.9694	-2.00804	0.0499138	0.995556	-5.85503
PTPRD	-2.31353	7.88543	-2.30702	0.0251207	0.995556	-5.25329
RABGAP1L	-2.32072	18.8813	-2.08324	0.0422267	0.995556	-5.71027
HMMR	-2.32425	8.36155	-2.96276	0.00461107	0.995556	-3.70679
SGMS2	-2.34802	10.5962	-2.32001	0.0243513	0.995556	-5.2256
ARFGEF2	-2.35641	13.399	-2.0138	0.0492853	0.995556	-5.84411
CNEP1R1	-2.3566	12.8142	-2.7733	0.0077157	0.995556	-4.18332
AC007387.2	-2.36459	8.16314	-2.04043	0.0464658	0.995556	-5.79323
RBPJ	-2.37569	18.1076	-2.06438	0.0440507	0.995556	-5.74699
CCNB2	-2.3951	14.7437	-2.52851	0.01457	0.995556	-4.7641
BFAR	-2.39987	24.7201	-2.076	0.0429187	0.995556	-5.7244
C6orf106	-2.4206	23.6804	-2.04062	0.0464463	0.995556	-5.79287
PIK3CB	-2.42398	16.9597	-2.096	0.04103	0.995556	-5.68526
MUC20P1	-2.42813	4.81858	-2.21102	0.0315134	0.995556	-5.45406
NBPF14	-2.43213	12.3215	-2.01088	0.0496023	0.995556	-5.84963
NCAPD2	-2.44361	15.6031	-2.0527	0.0452142	0.995556	-5.76959
VAMP7	-2.45895	19.0736	-2.34605	0.0228715	0.995556	-5.16971
HIATL1	-2.47639	24.8186	-2.13791	0.0373052	0.995556	-5.60221
RAB43	-2.48129	11.3689	-2.66615	0.0102341	0.995556	-4.44254
GPCPD1	-2.50409	15.079	-2.0901	0.0415792	0.995556	-5.69683
CSNK1G3	-2.50923	17.6312	-2.03258	0.047282	0.995556	-5.80829
USP38	-2.51732	10.9085	-2.28291	0.0266073	0.995556	-5.30437
MKI67	-2.52738	10.4084	-2.54692	0.0139064	0.995556	-4.72185
IGHV1-17	-2.53732	3.93844	-2.77846	0.00761023	0.995556	-4.17065
HAUS4	-2.54828	22.4029	-2.05763	0.0447201	0.995556	-5.76007
PDP1	-2.5491	10.8854	-2.34948	0.0226824	0.995556	-5.16229
ARL5A	-2.55654	16.9958	-2.03348	0.0471878	0.995556	-5.80656
CTTNBP2NL	-2.57604	13.4118	-2.17382	0.0343526	0.995556	-5.52994
SKAP2	-2.58245	16.8811	-2.07708	0.0428147	0.995556	-5.72229
SLX1B	-2.58962	4.48152	-2.48464	0.0162679	0.995556	-4.8638
TLK1	-2.59195	17.1087	-2.12889	0.0380811	0.995556	-5.6202
STAU2	-2.59614	13.7087	-2.53053	0.0144956	0.995556	-4.75947
TRIQK	-2.64169	13.8292	-2.31745	0.024501	0.995556	-5.23106
SLC35A5	-2.65178	17.3084	-2.1538	0.0359723	0.995556	-5.57035
HMGB3	-2.65899	19.57	-2.51997	0.0148871	0.995556	-4.7836
RFFL	-2.66865	16.1172	-2.50128	0.0156038	0.995556	-4.82614
SLU7	-2.67473	24.7077	-2.05871	0.0446118	0.995556	-5.75797
SETD8	-2.71809	21.6678	-2.05407	0.0450764	0.995556	-5.76695
TMEM263	-2.72158	20.1213	-2.09288	0.0413199	0.995556	-5.69139
HPSE	-2.73169	10.3902	-2.83624	0.00651684	0.995556	-4.02756
UBE2D1	-2.75997	20.2488	-2.17732	0.0340767	0.995556	-5.52286
SGMS1	-2.76069	12.178	-2.83477	0.00654277	0.995556	-4.03123
TMEM92	-2.78621	10.2881	-2.28422	0.0265248	0.995556	-5.30162
NUP50	-2.78867	18.3209	-2.23593	0.0297294	0.995556	-5.40263
KIAA0101	-2.79064	17.5209	-2.21648	0.0311143	0.995556	-5.44282
CCDC186	-2.80887	14.456	-2.06342	0.044145	0.995556	-5.74885
RP11-519G16.5	-2.82572	13.1065	-2.09183	0.0414179	0.995556	-5.69345
RP1-193H18.2	-2.83317	11.5883	-2.55518	0.0136178	0.995556	-4.70282
CYB5R4	-2.83455	16.5735	-2.48238	0.0163604	0.995556	-4.86891
XRN1	-2.83954	11.3105	-2.17704	0.0340985	0.995556	-5.52343
TAOK3	-2.85028	19.2652	-2.18272	0.0336536	0.995556	-5.51189
SPTLC2	-2.85814	16.4421	-2.55448	0.0136419	0.995556	-4.70442
ARFIP1	-2.86494	22.9828	-2.45836	0.0173692	0.995556	-4.92288
RTEL1	-2.8697	12.0514	-2.26281	0.0279059	0.995556	-5.34663
TMEM236	-2.90492	9.16557	-2.12014	0.0388467	0.995556	-5.63759
RAB21	-2.90988	20.8483	-2.1308	0.0379153	0.995556	-5.61639
IFNAR1	-2.91054	17.0499	-2.78131	0.00755269	0.995556	-4.16365
CTSO	-2.91107	14.5972	-2.4224	0.018985	0.995556	-5.00291
OAS3	-2.93633	11.1037	-2.24784	0.0289091	0.995556	-5.37789
PRC1	-2.94894	18.6081	-2.62209	0.0114729	0.995556	-4.54689
CPD	-2.96001	14.531	-2.26018	0.0280794	0.995556	-5.35212
TOX4	-2.96261	22.8414	-2.45608	0.0174679	0.995556	-4.92798
DNASE2	-2.98424	22.1448	-2.03806	0.0467107	0.995556	-5.79778
BROX	-2.98775	20.4338	-2.10427	0.0402701	0.995556	-5.66897
AIM1	-3.007	16.4043	-2.21664	0.0311029	0.995556	-5.4425
B4GALT4	-3.03162	24.2108	-2.10358	0.0403333	0.995556	-5.67034
ACO1	-3.03303	17.1913	-2.62759	0.0113112	0.995556	-4.53395
ANP32E	-3.04857	17.1631	-2.36652	0.0217648	0.995556	-5.12539
TOP2A	-3.0813	16.9477	-2.79289	0.00732241	0.995556	-4.13512
ZDHHC5	-3.08819	26.3695	-2.1657	0.0350021	0.995556	-5.54638
EXOC5	-3.08867	16.2413	-2.12906	0.038066	0.995556	-5.61986
MIR5587	-3.09292	7.33862	-2.14294	0.0368789	0.995556	-5.59215
NBPF19	-3.09996	10.473	-2.36157	0.0220278	0.995556	-5.13613
SEC23A	-3.11849	21.1651	-2.02202	0.0483992	0.995556	-5.82846
GNLY	-3.13695	11.4555	-2.32874	0.0238459	0.995556	-5.20692
RP11-162P23.2	-3.15144	5.13503	-2.60376	0.0120276	0.995556	-4.58992
SORT1	-3.15423	17.7729	-2.29279	0.0259888	0.995556	-5.28349
FNBP1L	-3.18055	17.3749	-2.28867	0.0262454	0.995556	-5.29222
UBE3A	-3.18779	20.2747	-2.16189	0.0353102	0.995556	-5.55407
KIAA1217	-3.18867	14.202	-2.35246	0.0225194	0.995556	-5.15585
OXCT1	-3.20022	16.1266	-2.43355	0.0184699	0.995556	-4.97819
TAB2	-3.20314	21.9189	-2.13251	0.0377681	0.995556	-5.61299
TRAFD1	-3.21319	20.5191	-2.04435	0.0460624	0.995556	-5.78569
CASP3	-3.21505	29.4041	-2.05688	0.0447945	0.995556	-5.76151
EDEM3	-3.25444	24.3067	-2.07189	0.0433166	0.995556	-5.73241
NUSAP1	-3.25847	19.1455	-2.21807	0.0309992	0.995556	-5.43955
ATG13	-3.27131	28.2488	-2.42017	0.0190894	0.995556	-5.00784
CD38	-3.28926	12.3001	-2.0359	0.046935	0.995556	-5.80192
PPP4R3B	-3.29309	25.6137	-2.02899	0.0476593	0.995556	-5.81515
MAN1A1	-3.38759	20.9239	-2.1168	0.0391424	0.995556	-5.64421
CDK1	-3.40198	20.0197	-2.34325	0.0230263	0.995556	-5.17573
TLR3	-3.44108	10.2221	-2.84501	0.00636417	0.995556	-4.00564
DAPP1	-3.46514	12.7867	-2.21789	0.0310121	0.995556	-5.43992
YIPF5	-3.47483	25.0066	-2.18967	0.0331164	0.995556	-5.49774
ACE2	-3.48577	10.078	-3.10501	0.00309435	0.995556	-3.3344
TANK	-3.52827	32.0143	-2.03184	0.0473597	0.995556	-5.80971
TMEM19	-3.54421	17.3597	-2.90274	0.00543911	0.995556	-3.8602
9/10/2018	-3.58792	25.7435	-2.01862	0.0487641	0.995556	-5.83494
ANKRD13A	-3.6036	24.4142	-2.11967	0.0388882	0.995556	-5.63852
RNF103	-3.63965	24.1885	-2.06735	0.0437584	0.995556	-5.74122
TRDJ1	-3.6585	4.36995	-2.91393	0.00527495	0.995556	-3.83177
TBL1XR1	-3.66507	25.5866	-2.01896	0.0487272	0.995556	-5.83428
GNAQ	-3.67086	21.0759	-2.33217	0.0236499	0.995556	-5.19956
SUSD6	-3.68284	20.9965	-2.10996	0.0397548	0.995556	-5.65775
PDZD8	-3.68831	12.6822	-2.91284	0.00529076	0.995556	-3.83455
TRANK1	-3.70784	14.7704	-2.1386	0.0372462	0.995556	-5.60082
PPP2R4	-3.72567	46.9975	-2.22408	0.0305665	0.995556	-5.42715
AP1G1	-3.77477	25.3975	-2.12416	0.0384929	0.995556	-5.6296
SLC25A37	-3.80513	18.7259	-2.30849	0.0250329	0.995556	-5.25017
SIPA1L3	-3.8105	16.0658	-2.60267	0.0120613	0.995556	-4.59247
NUCKS1	-3.85879	30.7284	-2.32249	0.0242067	0.995556	-5.2203
TMEM167A	-3.89351	39.166	-2.03851	0.046664	0.995556	-5.79691
CYLD	-3.90704	18.6541	-2.26236	0.0279355	0.995556	-5.34757
SH3KBP1	-3.91125	32.7551	-2.1409	0.0370515	0.995556	-5.59623
ADIPOR1	-3.91149	43.523	-2.35493	0.0223856	0.995556	-5.15053
ABI1	-3.92885	30.9521	-2.34024	0.0231946	0.995556	-5.18222
ETNK1	-3.92931	20.1745	-2.31054	0.0249104	0.995556	-5.24581
DTX3L	-3.94354	18.7398	-2.40791	0.0196733	0.995556	-5.03489
AHCYL1	-4.03548	33.3569	-2.05913	0.0445701	0.995556	-5.75716
RAB5A	-4.0474	32.8073	-2.12944	0.0380331	0.995556	-5.6191
SAMD9	-4.06514	16.0373	-2.52945	0.0145352	0.995556	-4.76194
ALDH1A2	-4.07124	8.97509	-2.60534	0.0119788	0.995556	-4.58622
YES1	-4.1023	23.8895	-2.26725	0.0276143	0.995556	-5.33732
RNF19A	-4.13743	22.3591	-2.04132	0.0463736	0.995556	-5.79151
TNRC18	-4.15272	21.1808	-2.1251	0.0384108	0.995556	-5.62773
SPECC1	-4.17012	24.0927	-2.52642	0.014647	0.995556	-4.76888
DLG3	-4.19243	25.3079	-2.231	0.0300755	0.995556	-5.41285
FUT8	-4.2268	21.038	-2.35089	0.0226054	0.995556	-5.15926
PTBP3	-4.22837	25.3086	-2.29374	0.0259302	0.995556	-5.28148
TBC1D2B	-4.31987	22.3308	-2.30188	0.0254316	0.995556	-5.26423
SEC63	-4.39168	34.9588	-2.0913	0.0414673	0.995556	-5.69449
SVIL	-4.41135	20.9637	-2.21648	0.0311143	0.995556	-5.44282
RFK	-4.44649	29.5162	-2.16917	0.0347234	0.995556	-5.53937
MAN2A1	-4.44715	25.7469	-2.10583	0.0401278	0.995556	-5.66589
PPP2R5A	-4.50081	30.1588	-2.36619	0.0217826	0.995556	-5.12612
TRIM69	-4.55115	18.1154	-2.74068	0.00841436	0.995556	-4.26305
APOL6	-4.55887	16.3136	-2.86657	0.00600286	0.995556	-3.95158
ALDH7A1	-4.62461	30.2183	-2.72872	0.00868485	0.995556	-4.29211
KRAS	-4.62789	27.3516	-2.08911	0.0416721	0.995556	-5.69877
IGHV7-56	-4.66386	6.54267	-3.03348	0.00378646	0.995556	-3.52316
SAMHD1	-4.69582	24.8075	-2.03662	0.0468603	0.995556	-5.80054
LYN	-4.78419	22.7697	-2.16382	0.0351541	0.995556	-5.55018
MAPK6	-4.81653	25.2055	-2.32884	0.0238403	0.995556	-5.20671
LIPG	-4.81769	14.6571	-2.41153	0.0194993	0.995556	-5.02692
NCOR1	-4.85803	42.2945	-2.22735	0.0303339	0.995556	-5.42041
GALNT8	-4.88338	17.1414	-2.23763	0.0296114	0.995556	-5.39912
GLUD1	-5.00679	49.5609	-2.03407	0.0471254	0.995556	-5.80542
PARP14	-5.01086	19.2332	-2.26433	0.0278058	0.995556	-5.34344
SAMD9L	-5.02	17.0527	-2.40586	0.0197726	0.995556	-5.0394
CCNC	-5.03119	38.1623	-2.36785	0.0216946	0.995556	-5.1225
BCL10	-5.06808	26.9692	-2.29662	0.0257525	0.995556	-5.27537
SLC35F5	-5.12944	34.5958	-2.15956	0.0354999	0.995556	-5.55877
CMTM6	-5.13047	38.7856	-2.38571	0.0207715	0.995556	-5.08359
ELL2	-5.14159	19.6551	-2.37047	0.0215569	0.995556	-5.11681
CCPG1	-5.15236	31.8202	-2.30075	0.0255	0.995556	-5.26662
STS	-5.18223	13.5811	-2.46522	0.0170753	0.995556	-4.9075
SNX6	-5.30264	40.8491	-2.08353	0.0421992	0.995556	-5.7097
BAZ2A	-5.35983	25.563	-2.08246	0.0423003	0.995556	-5.71178
LRG1	-5.37853	18.1938	-2.16858	0.0347707	0.995556	-5.54056
ERLEC1	-5.38244	44.3019	-2.24591	0.0290406	0.995556	-5.38191
LMNB1	-5.46712	31.1583	-2.20493	0.0319633	0.995556	-5.46655
B3GNT6	-5.46948	23.7208	-2.06686	0.0438068	0.995556	-5.74218
SULF2	-5.47135	49.9996	-2.09546	0.0410795	0.995556	-5.68631
SMC4	-5.53162	31.1	-2.01401	0.0492625	0.995556	-5.84371
DAP	-5.56372	62.2912	-2.05018	0.0454692	0.995556	-5.77447
C5orf15	-5.58415	31.4715	-2.70279	0.00929862	0.995556	-4.35477
SEMA3C	-5.59968	22.6015	-2.57145	0.0130652	0.995556	-4.6652
SLC5A1	-5.6101	16.6041	-3.25393	0.00201622	0.995556	-2.93186
MAPKAPK2	-5.62479	47.2204	-2.01377	0.0492881	0.995556	-5.84416
AKIRIN2	-5.64898	33.4957	-2.55897	0.0134872	0.995556	-4.69408
TRIM2	-5.68288	25.9923	-2.48869	0.0161043	0.995556	-4.85467
ATP11B	-5.68323	27.1774	-2.52722	0.0146174	0.995556	-4.76705
BTN3A3	-5.69877	19.2455	-2.74032	0.00842233	0.995556	-4.26392
CASC4	-5.72791	33.8829	-2.47996	0.0164596	0.995556	-4.87437
MTDH	-5.74932	35.4616	-2.22861	0.0302444	0.995556	-5.4178
RNF19B	-5.79609	27.5796	-3.01691	0.00396622	0.995556	-3.56645
RAB27A	-5.80434	42.8295	-2.2291	0.0302099	0.995556	-5.41679
PRKAA1	-5.82915	32.9672	-2.05584	0.0448989	0.995556	-5.76353
AC244250.3	-5.93802	6.58992	-2.16699	0.0348984	0.995556	-5.54378
MOB1A	-5.9791	46.1009	-2.05344	0.04514	0.995556	-5.76817
NDFIP2	-5.98894	41.9645	-2.0241	0.0481774	0.995556	-5.82449
SEL1L	-6.13009	30.1819	-2.14196	0.0369614	0.995556	-5.59411
ZDHHC20	-6.13974	32.0013	-2.37299	0.0214255	0.995556	-5.11134
CASP10	-6.20394	28.0494	-2.48139	0.0164007	0.995556	-4.87113
CKAP4	-6.27528	54.0149	-2.01385	0.0492792	0.995556	-5.844
HCP5	-6.42443	31.139	-2.79971	0.00718984	0.995556	-4.11828
IGHV1-67	-6.46622	14.6202	-2.03326	0.0472106	0.995556	-5.80698
NUB1	-6.54677	37.4967	-2.29273	0.0259927	0.995556	-5.28362
TAX1BP1	-6.57146	58.8254	-2.19201	0.0329378	0.995556	-5.49298
WIPI1	-6.64445	36.3484	-2.75498	0.0081013	0.995556	-4.2282
CECR1	-6.64666	31.1088	-2.25497	0.0284271	0.995556	-5.36301
PALLD	-6.65265	39.19	-2.30549	0.0252131	0.995556	-5.25656
BTN3A2	-6.77017	31.3548	-2.14884	0.036384	0.995556	-5.58032
OPTN	-6.86982	47.3356	-2.46171	0.0172251	0.995556	-4.91537
FCGR3A	-6.9105	17.6698	-2.38896	0.0206074	0.995556	-5.07648
DERL1	-7.08079	42.6355	-2.68916	0.00963708	0.995556	-4.38753
BCAP29	-7.1608	40.7083	-2.60527	0.0119811	0.995556	-4.58639
HOXB-AS4	-7.19569	26.5906	-2.17073	0.0345986	0.995556	-5.53621
UBE2J1	-7.21708	50.4605	-2.29528	0.025835	0.995556	-5.27822
TNIP1	-7.36489	71.6609	-2.19182	0.0329523	0.995556	-5.49337
CDC42SE2	-7.45796	53.1018	-2.6485	0.010715	0.995556	-4.48451
BTN3A1	-7.60627	30.7551	-2.42363	0.0189273	0.995556	-5.00018
GNG12	-7.80438	48.9867	-2.02865	0.0476947	0.995556	-5.81579
JAK1	-7.89087	47.4504	-2.02051	0.0485609	0.995556	-5.83133
IL13RA1	-7.89247	44.3761	-2.58769	0.0125339	0.995556	-4.62745
SH3GLB1	-8.11544	53.2885	-2.86211	0.00607595	0.995556	-3.96278
SLAMF7	-8.41706	41.5664	-2.03821	0.0466951	0.995556	-5.79749
ADAM10	-8.41964	36.9232	-2.40121	0.019999	0.995556	-5.04962
CAPZA1	-8.44822	84.3668	-2.04779	0.0457115	0.995556	-5.77907
GFPT1	-8.50565	42.8371	-2.28287	0.02661	0.995556	-5.30446
IL18	-8.53563	53.3435	-2.12503	0.0384171	0.995556	-5.62788
PEA15	-8.61213	50.67	-2.12294	0.0385998	0.995556	-5.63202
NT5C3A	-8.89355	68.1481	-2.20902	0.0316609	0.995556	-5.45817
SLC37A1	-8.95322	48.346	-2.52372	0.0147472	0.995556	-4.77506
TNFSF13	-9.22735	49.4532	-2.71583	0.00898513	0.995556	-4.32331
PPP1CB	-9.27571	67.3572	-2.0533	0.0451544	0.995556	-5.76845
SSR1	-9.32028	62.9937	-2.12645	0.0382931	0.995556	-5.62505
UBA7	-9.32061	54.1162	-2.09545	0.0410808	0.995556	-5.68634
ADAR	-9.34584	52.7018	-2.10612	0.0401019	0.995556	-5.66533
SLC9A3	-9.41536	27.7725	-2.11939	0.0389129	0.995556	-5.63907
ACVRL1	-9.46652	66.021	-2.08784	0.0417915	0.995556	-5.70126
ADAM9	-9.5591	49.9251	-2.41237	0.019459	0.995556	-5.02506
NFE2L1	-9.65045	64.979	-2.06456	0.0440334	0.995556	-5.74665
TC2N	-9.71083	41.079	-2.36306	0.0219487	0.995556	-5.13291
STT3A	-9.94295	93.9338	-2.04016	0.0464931	0.995556	-5.79374
PLBD1	-10.1453	63.3715	-2.23207	0.0300001	0.995556	-5.41064
SULT1B1	-10.3287	43.6911	-2.25549	0.028392	0.995556	-5.36192
CLIC5	-10.3668	42.6938	-2.13457	0.0375904	0.995556	-5.60887
NUCB2	-10.4656	69.5794	-2.24499	0.0291036	0.995556	-5.38382
MAP2K6	-10.6735	44.6067	-2.6569	0.0104835	0.995556	-4.46456
TAP2	-10.6854	45.6665	-2.14779	0.0364712	0.995556	-5.58242
YWHAQ	-10.7297	117.497	-2.21813	0.0309947	0.995556	-5.43942
VNN1	-10.9885	25.2642	-2.37697	0.0212188	0.995556	-5.10266
PRKAR1A	-11.3273	69.4291	-2.06689	0.0438041	0.995556	-5.74212
IGHV1OR16-1	-11.3291	20.0561	-2.18022	0.0338493	0.995556	-5.51698
SLC39A8	-11.5514	55.6208	-2.01314	0.0493566	0.995556	-5.84535
GSKIP	-11.6397	61.7497	-2.42006	0.0190947	0.995556	-5.00809
HMGB2	-11.7936	95.5395	-2.14136	0.0370118	0.995556	-5.5953
RP11-673C5.1	-11.9224	88.8544	-2.06614	0.043878	0.995556	-5.74359
RAP1B	-12.2954	125.24	-2.04994	0.045493	0.995556	-5.77492
CDV3	-12.4108	79.7221	-2.53262	0.0144194	0.995556	-4.75469
CLINT1	-12.9101	71.9446	-2.31003	0.0249405	0.995556	-5.24689
ATP10B	-13.0833	56.5477	-2.2303	0.0301248	0.995556	-5.4143
IVNS1ABP	-14.1885	72.535	-2.67775	0.00992912	0.995556	-4.41486
XDH	-14.2072	31.7554	-2.59559	0.0122825	0.995556	-4.60901
NFKBIZ	-14.5012	52.1824	-2.47493	0.0166674	0.995556	-4.88569
CNDP2	-14.557	96.1833	-2.64123	0.010919	0.995556	-4.50174
LAP3	-14.6784	62.2367	-2.32225	0.0242205	0.995556	-5.22081
TNFSF10	-14.8442	92.6631	-2.01335	0.0493332	0.995556	-5.84494
VAPA	-14.9912	124.322	-2.18738	0.0332927	0.995556	-5.50241
PLSCR1	-15.1302	87.7635	-2.11868	0.0389759	0.995556	-5.64048
ZC3H12A	-15.1995	44.1961	-2.67897	0.00989752	0.995556	-4.41194
STAT3	-15.276	65.2498	-2.54628	0.013929	0.995556	-4.72332
HHLA2	-15.6356	69.088	-2.35255	0.0225149	0.995556	-5.15567
PTP4A2	-16.9092	162.32	-2.14448	0.0367492	0.995556	-5.58906
CCL28	-17.143	53.481	-3.407	0.0012841	0.995556	-2.5053
ADTRP	-17.4976	74.8679	-2.97893	0.00440889	0.995556	-3.66506
GLRX	-17.7076	74.3118	-2.82093	0.00679138	0.995556	-4.06567
RP11-1166P10.8	-17.9023	50.147	-2.09721	0.040918	0.995556	-5.68288
CALM3	-18.1612	149.412	-2.33622	0.0234203	0.995556	-5.19086
HIF1A	-18.6353	78.0504	-2.18201	0.0337087	0.995556	-5.51332
CFB	-18.9225	70.2788	-2.0693	0.0435679	0.995556	-5.73743
CMPK1	-19.6265	124.543	-2.5488	0.0138402	0.995556	-4.71752
CD68	-19.7535	106.063	-2.32123	0.0242803	0.995556	-5.223
IRF1	-19.9809	93.0126	-2.05464	0.0450191	0.995556	-5.76585
PARM1	-20.3716	109.776	-2.3803	0.0210474	0.995556	-5.0954
TM9SF3	-22.7441	116.498	-2.44649	0.0178882	0.995556	-4.9494
HK2	-24.8943	94.6673	-2.1149	0.0393113	0.995556	-5.64796
SOD1	-25.1277	198.352	-2.1124	0.0395349	0.995556	-5.65291
PLS1	-28.4668	141.66	-2.26122	0.028011	0.995556	-5.34996
CASP1	-31.0919	122.314	-2.09923	0.0407315	0.995556	-5.6789
CASP5	-31.5736	78.2869	-2.56346	0.0133338	0.995556	-4.68368
TXNDC5	-38.4564	230.094	-2.04685	0.0458068	0.995556	-5.78087
UBC	-50.072	535.513	-2.1944	0.0327554	0.995556	-5.4881
IGHV3-64	-51.5672	152.844	-2.02268	0.0483286	0.995556	-5.8272
SLC40A1	-54.0577	155.806	-3.36031	0.00147519	0.995556	-2.63673
SERPINA1	-54.2989	203.151	-2.53873	0.014198	0.995556	-4.74067
HLA-E	-55.7556	358.385	-2.29005	0.0261592	0.995556	-5.2893
IGHV3-13	-56.914	94.8574	-2.73251	0.0085982	0.995556	-4.28291
ITM2B	-63.9154	565.9	-2.03863	0.0466519	0.995556	-5.79669
CH17-212P11.4	-74.0945	168.431	-2.58724	0.0125483	0.995556	-4.6285
IGHV3-20	-78.1863	152.912	-2.10222	0.0404576	0.995556	-5.67302
MUC13	-79.3426	465.486	-2.02591	0.0479851	0.995556	-5.82104
PABPC1	-82.4974	697.687	-2.62507	0.0113852	0.995556	-4.53989
CEACAM6	-106.846	505.131	-2.00852	0.0498612	0.995556	-5.85412
FCGBP	-107.596	270.461	-2.55023	0.01379	0.995556	-4.71423
SEPP1	-182.963	708.545	-2.60067	0.0121234	0.995556	-4.59715
HLA-B	-242.196	1433.52	-2.03591	0.0469341	0.995556	-5.8019
IGHV3-7	-282.655	1030.29	-2.08543	0.0420186	0.995556	-5.70598
PIGR	-309.133	1661.26	-2.2789	0.0268616	0.995556	-5.31282
PI3	-344.216	871.075	-2.74773	0.0082587	0.995556	-4.24589
IGHV1-18	-471.221	1044.65	-2.51635	0.0150237	0.995556	-4.79187
LCN2	-587.834	1500.66	-2.56414	0.0133107	0.995556	-4.68211
JCHAIN	-831.747	3670.03	-2.50241	0.0155598	0.995556	-4.82359
Corticosteriods
Tag	logFC	AveExpr	t	P.Value	adj.P.Val	B
IGKV1D-39	1077.13	5347.23	2.62965	0.00942976	0.368403	-4.69282
IGHA2	1021.87	5489.86	2.01464	0.0457127	0.592533	-6.07883
IGHV4-34	544.855	1774.34	2.42578	0.0164518	0.444312	-5.19004
REG1A	298.997	543.691	2.81744	0.00548722	0.301369	-4.20254
IGHV1-3	279.689	860.842	2.27193	0.0244994	0.498888	-5.54066
OLFM4	237.169	1000.04	2.00858	0.0463601	0.595455	-6.09078
SPINK4	217.04	761.608	2.23489	0.026889	0.512287	-5.62188
IGHV4-61	203.725	642.883	2.70644	0.00758218	0.33951	-4.49606
IGLL5	130.304	756.729	1.99192	0.0481786	0.599094	-6.12343
IGHV1-46	111.291	458.106	2.37634	0.0187361	0.458885	-5.30504
IGHJ3P	92.9691	427.622	2.92169	0.00401498	0.283464	-3.91722
CXCL1	84.2684	299.04	3.31316	0.00115404	0.197844	-2.76429
DEFB4A	83.6497	113.756	3.10696	0.00225775	0.241752	-3.38744
IGKV2D-29	74.9068	249.972	1.99819	0.0474873	0.597829	-6.11118
SPARC	67.2875	343.864	3.27103	0.00132704	0.202916	-2.89443
DUOXA2	65.0021	214.717	3.54028	0.000531382	0.150428	-2.03804
CTSB	59.3602	502.824	2.15171	0.0330058	0.542818	-5.79969
ANXA1	57.7045	169.171	3.23797	0.00147942	0.211175	-2.99555
DUOX2	56.1322	252.904	2.70376	0.00764052	0.340546	-4.50299
XBP1	55.0904	362.502	4.38573	2.15e-05	0.0972934	1.01163
LDHA	54.1481	507.448	2.00907	0.0463072	0.595455	-6.08981
PDZK1IP1	51.9851	286.627	2.63435	0.00930596	0.366128	-4.68092
IGHV3-73	50.2941	209.221	2.0881	0.0384634	0.56587	-5.93139
HSP90B1	49.7294	575.212	2.13557	0.0343236	0.54944	-5.83347
CD55	47.4266	161.827	3.04781	0.00272101	0.251976	-3.55972
SERPINA1	47.3592	281.149	2.14853	0.0332622	0.543593	-5.80637
NOS2	45.7176	137.215	2.98188	0.00333973	0.266308	-3.74829
IGKV1-8	42.6366	209.765	2.21658	0.0281435	0.516289	-5.66157
MZB1	42.0987	234.696	3.1897	0.00173137	0.221331	-3.1416
IGFBP7	40.1175	221.483	3.94941	0.000119731	0.107616	-0.628274
SAA1	39.2933	122.222	2.59809	0.0103004	0.381942	-4.77221
NAMPT	38.1104	156.464	2.35983	0.0195591	0.465883	-5.34295
CD59	35.2837	211.627	3.32731	0.00110081	0.194463	-2.72024
MMP12	33.9272	154.501	2.23197	0.0270858	0.512553	-5.62824
IGKV1D-16	33.3109	71.1776	2.71177	0.00746692	0.338829	-4.4822
TPM4	32.7654	306.663	2.44377	0.015684	0.438295	-5.14766
PGK1	31.0297	290.757	2.21171	0.0284852	0.518246	-5.67206
ATP1B1	28.1451	217.55	2.1854	0.0303965	0.526941	-5.72843
STOM	27.7273	103.789	4.04379	8.35e-05	0.100318	-0.285162
TXNDC5	26.3702	267.765	2.33102	0.0210716	0.477058	-5.40852
PIM2	26.0408	120.276	3.99714	9.99e-05	0.100318	-0.455579
IFITM1	25.8459	203.94	2.48823	0.0139215	0.423024	-5.04166
AC246787.4	24.9931	138.965	2.05397	0.0416988	0.578152	-6.00052
PLAU	24.2213	58.2656	4.12455	6.11e-05	0.0972934	0.0135694
ERO1A	23.7588	77.4411	3.48245	0.000649702	0.158757	-2.22686
HIF1A	23.4696	114.925	3.16496	0.0018754	0.228571	-3.2157
TGM2	23.2161	67.6528	4.17486	5.01e-05	0.0972934	0.202065
SLC6A14	23.1588	57.9166	3.48585	0.000642118	0.158	-2.21584
SAA2	22.7795	66.8225	3.01807	0.0029857	0.260543	-3.64523
F3	22.4404	87.0702	3.5355	0.000540335	0.151304	-2.05375
TNFRSF6B	22.3816	89.1735	2.69694	0.00779134	0.342328	-4.52067
CXCL3	22.3415	98.2308	2.89647	0.00433349	0.288524	-3.98709
TNIP3	21.2083	53.9977	2.80852	0.00563362	0.305264	-4.22651
COL4A1	20.1297	56.2549	3.91813	0.000134733	0.111814	-0.740524
COL1A1	20.1274	110.375	2.03754	0.0433378	0.585569	-6.03341
GLRX	20.0627	101.451	3.70733	0.000293318	0.131491	-1.47791
CTSC	18.9518	218.264	1.99458	0.047884	0.598796	-6.11823
LAMC2	18.8836	43.0807	4.1998	4.54e-05	0.0972934	0.296171
DERL3	18.229	116.492	2.69778	0.00777269	0.342046	-4.5185
TM4SF1	17.5652	79.1221	2.71128	0.00747753	0.338829	-4.48349
MIR4539	17.2558	88.3576	2.22367	0.0276518	0.514071	-5.64624
FKBP11	17.2304	113.606	3.79106	0.000216147	0.121633	-1.18904
ADM	17.217	63.819	3.55496	0.000504738	0.149766	-1.98967
PLAUR	16.2937	80.7472	2.53894	0.0121284	0.405138	-4.9186
COL4A2	14.8131	57.8079	3.2731	0.00131801	0.202916	-2.88807
FSTL1	14.6308	66.614	3.59271	0.000441914	0.149167	-1.86457
TYMP	13.7865	89.7306	2.40124	0.017553	0.450953	-5.24741
LAMA3	13.545	35.7995	3.69116	0.000310945	0.13283	-1.53305
SEC11C	13.3582	175.037	2.59325	0.0104399	0.383063	-4.78429
COL6A3	13.0851	44.9412	3.36213	0.000979459	0.184152	-2.61119
CXCL2	13.0417	51.7507	2.42013	0.0166996	0.444675	-5.20329
IGKV1-39	12.8653	69.3988	2.35912	0.019595	0.466136	-5.34457
XDH	12.698	43.9078	2.75337	0.00662096	0.325699	-4.37326
CTSL	12.6715	67.2238	2.57434	0.0110024	0.392634	-4.83136
GBP1	12.5266	60.803	2.20153	0.0292124	0.522732	-5.69396
CFB	12.3024	88.7214	2.32475	0.0214143	0.478917	-5.4227
FHL2	12.0017	88.644	2.24378	0.0262978	0.507642	-5.60251
NCOA7	11.988	51.1054	2.67347	0.0083311	0.351022	-4.58117
MMP10	11.9747	20.6602	3.68385	0.00031925	0.13539	-1.55794
SOCS3	11.5273	49.4908	2.0139	0.0457921	0.592839	-6.08031
SPRR1B	11.4735	14.0664	2.32207	0.0215622	0.479448	-5.42875
ANXA5	11.0321	135.364	1.98842	0.048568	0.600281	-6.13025
PFKFB3	10.9283	37.1973	3.19127	0.00172257	0.221331	-3.13687
BACE2	10.7569	84.4197	2.0361	0.0434842	0.585569	-6.03629
ARPC1B	10.6606	159.626	2.06298	0.0408235	0.576073	-5.98239
ZC3H12A	10.5115	57.8377	2.81552	0.00551847	0.301835	-4.20771
U2	10.475	23.0041	2.10218	0.0371934	0.562195	-5.90257
TMEM165	10.1454	71.0669	3.28981	0.00124715	0.202916	-2.8366
RNF213	10.0655	66.8788	2.31774	0.0218033	0.479857	-5.43851
ERRFI1	9.68649	40.1999	2.91432	0.00410577	0.283738	-3.93769
SSR3	9.39253	109.112	3.10344	0.00228316	0.241752	-3.39778
ZG16B	9.34565	65.7365	1.97757	0.0497932	0.602213	-6.15135
LAP3	9.34134	73.4368	2.05492	0.0416059	0.577634	-5.99861
CARHSP1	9.18693	59.6126	3.57375	0.000472492	0.149229	-1.92756
TFRC	9.13611	65.2255	2.01438	0.0457404	0.592685	-6.07935
THY1	9.02291	47.7325	3.07172	0.00252409	0.247852	-3.49043
PLOD2	8.82073	41.7138	2.97213	0.00344152	0.269109	-3.77586
CALD1	8.60712	54.6745	3.0952	0.00234364	0.241752	-3.42194
C4BPB	8.26872	34.0818	2.38694	0.018224	0.454622	-5.28057
AC246787.3	7.98532	44.4739	2.07432	0.0397428	0.571616	-5.95943
AC246787.5	7.98532	44.4739	2.07432	0.0397428	0.571616	-5.95943
CTSK	7.93526	59.6629	2.42198	0.0166181	0.444675	-5.19896
SLC2A1	7.9277	50.5097	2.36789	0.0191534	0.462814	-5.32448
BHLHE40	7.78086	41.2357	3.13068	0.00209343	0.236655	-3.31755
SBNO2	7.75653	43.2285	2.89985	0.00428954	0.287505	-3.97777
FADS2	7.69218	29.5474	2.28875	0.023477	0.495334	-5.50336
CSF3R	7.63289	25.3958	2.06077	0.0410361	0.576109	-5.98683
BGN	7.62409	41.2008	2.54864	0.0118101	0.40162	-4.89482
CXCL6	7.61152	18.7685	3.14543	0.00199691	0.233063	-3.27385
IGHV1-45	7.60734	18.9835	2.19778	0.0294836	0.523096	-5.70198
POU2AF1	7.53319	41.7408	2.90293	0.00424983	0.287202	-3.96926
PEA15	7.5254	59.9449	2.90515	0.00422138	0.286715	-3.96311
VEGFA	7.47941	50.1893	2.91717	0.0040705	0.283597	-3.92979
PMEPA1	7.46322	26.5942	4.16093	5.3e-05	0.0972934	0.149713
PRDX4	7.32608	84.4296	3.05211	0.0026846	0.251398	-3.5473
CALU	7.2899	58.8113	2.84719	0.0050235	0.293727	-4.12207
RRM2	7.19784	42.9716	2.32354	0.0214809	0.478917	-5.42543
GBP2	7.18665	64.7978	2.04047	0.0430415	0.584582	-6.02757
EPAS1	7.16231	55.7825	2.57091	0.0111074	0.393002	-4.83987
MFGE8	7.06634	45.1483	2.93222	0.00388852	0.280425	-3.8879
ICAM1	6.88235	28.9768	2.51464	0.0129601	0.413792	-4.97786
ITGA2	6.79065	15.2506	3.95388	0.000117724	0.107616	-0.612193
SERPINH1	6.77607	48.2881	2.66098	0.00863179	0.356692	-4.61316
AGT	6.72485	14.7484	4.2115	4.34e-05	0.0972934	0.340494
PECAM1	6.67875	46.6245	2.21175	0.0284824	0.518246	-5.67198
MMP14	6.6713	51.7126	2.2277	0.0273753	0.51275	-5.63749
LAMB3	6.55101	35.1401	2.65608	0.00875254	0.356709	-4.62569
SEMA4B	6.4621	46.9127	2.2273	0.0274027	0.51275	-5.63836
C4BPA	6.35388	16.0279	2.8017	0.005748	0.307492	-4.2448
ZBP1	6.28446	28.4703	4.37006	2.3e-05	0.0972934	0.95043
MAPKAPK2	6.19924	56.0095	3.14508	0.00199914	0.233063	-3.27489
SERPINA3	6.18105	18.5374	2.42737	0.0163827	0.443828	-5.18631
RP1-261G23.7	6.16017	34.4882	2.32039	0.0216551	0.479591	-5.43252
SLC38A2	6.14037	52.2017	2.14362	0.0336607	0.545091	-5.81665
AC159540.1	6.14032	26.6132	3.09332	0.00235762	0.241752	-3.42744
CFLAR	6.07506	61.1558	2.35093	0.0200156	0.470295	-5.36328
SPCS3	6.02778	52.664	3.50724	0.000596231	0.1578	-2.14624
CLPTM1L	5.98502	97.4005	2.32571	0.0213613	0.478917	-5.42052
SNORA63	5.98162	6.14011	2.15426	0.0328017	0.541711	-5.79433
C17orf62	5.95481	60.9836	2.61637	0.00978769	0.373656	-4.72633
ITGB6	5.87075	16.7326	3.31077	0.00116326	0.197844	-2.77171
LOXL2	5.80552	21.3995	3.4913	0.000630105	0.158	-2.19811
ACTN1	5.72506	55.3854	2.22613	0.0274827	0.513011	-5.6409
KDM5D	5.69097	12.7014	2.79778	0.0058148	0.308527	-4.25532
ANGPTL4	5.64813	12.0723	3.42486	0.000791801	0.166073	-2.41226
TRIM22	5.64153	38.8867	2.36166	0.0194661	0.464994	-5.33876
ALOX5	5.5452	26.7277	2.66075	0.0086374	0.356692	-4.61375
AEBP1	5.52922	37.2136	2.35628	0.0197403	0.467537	-5.35108
PDPN	5.52289	21.2895	3.09598	0.00233782	0.241752	-3.41964
FCRL5	5.52011	23.7408	3.13219	0.00208334	0.236655	-3.31308
TXLNGY	5.46294	15.6129	2.15424	0.0328041	0.541711	-5.79439
MCAM	5.40488	23.4978	3.56457	0.000487996	0.149229	-1.95794
ENG	5.40211	40.4832	2.39789	0.0177079	0.451771	-5.25518
FAM26F	5.39114	26.2362	2.2099	0.0286133	0.518574	-5.67596
SPON2	5.36996	36.7864	2.41993	0.0167084	0.444675	-5.20376
IL7R	5.34159	26.8825	2.22312	0.0276897	0.514213	-5.64743
STAT2	5.32696	53.2789	2.21454	0.0282864	0.517162	-5.66598
PHLDA1	5.29242	19.1492	3.1286	0.00210736	0.237632	-3.32369
TCN1	5.23597	12.0488	2.83427	0.00522039	0.295824	-4.15712
RND1	5.23417	14.2221	4.09198	6.93e-05	0.100318	-0.107471
EPHA2	5.22798	21.6211	2.98604	0.00329713	0.265421	-3.73649
PRSS22	5.21661	29.7316	2.20565	0.0289161	0.521386	-5.68511
IL4R	5.21108	48.3197	2.18385	0.0305128	0.527619	-5.73174
SERPINB5	5.21004	20.4534	2.15201	0.0329824	0.542818	-5.79908
ELL2	5.18329	26.5064	3.8489	0.000174549	0.120486	-0.986393
IGKV1D-12	5.01571	5.97047	2.15858	0.0324589	0.540054	-5.78525
IL6ST	5.00202	39.8951	2.03029	0.0440777	0.587008	-6.04784
VWA1	4.95402	50.5049	1.99094	0.0482875	0.599094	-6.12535
RBPMS	4.89573	43.7622	2.73083	0.00706788	0.33602	-4.43247
PDLIM7	4.86531	33.2018	2.77822	0.00615817	0.316697	-4.30747
CCNL1	4.84555	59.4938	2.09948	0.0374337	0.563182	-5.90811
WSB1	4.82635	50.5282	2.26783	0.0247545	0.500336	-5.54971
FILIP1L	4.73169	23.6562	3.21809	0.00157875	0.215876	-3.05594
XAF1	4.65772	30.6437	2.20679	0.028835	0.520685	-5.68267
EIF1AY	4.65381	13.9183	2.16745	0.0317638	0.534723	-5.76653
LMAN1	4.64644	39.8195	2.64794	0.00895638	0.361492	-4.64644
MACF1	4.59324	37.6758	2.71029	0.00749869	0.338913	-4.48604
PRSS2	4.50423	7.65604	2.2713	0.0245387	0.499047	-5.54206
CASP4	4.48182	47.9032	1.98613	0.0488245	0.600295	-6.13472
LPIN1	4.46578	21.5174	3.64033	0.000373141	0.143669	-1.70515
MYO1B	4.44806	34.1341	2.01659	0.0455066	0.591829	-6.07499
DDX3Y	4.43493	12.2457	2.15686	0.0325948	0.540404	-5.78886
COL5A2	4.34131	21.2054	2.79529	0.00585753	0.309094	-4.26197
IGHJ2P	4.33224	17.6886	2.29644	0.0230227	0.491326	-5.48625
RP11-488L18.4	4.32858	40.7472	2.18789	0.0302114	0.526704	-5.72313
SOCS1	4.22731	21.2525	2.45437	0.0152468	0.433917	-5.12255
LAMC1	4.22204	26.6412	2.5328	0.012334	0.406771	-4.93363
CSNK1E	4.20691	58.2554	2.58344	0.0107286	0.38875	-4.80876
KIAA0125	4.16525	23.6092	2.13439	0.0344215	0.550195	-5.83593
GJA1	4.16394	23.8469	2.26075	0.0252005	0.503309	-5.56532
AKIRIN2	4.15292	38.3035	2.55458	0.0116188	0.399049	-4.8802
BCL6	4.14276	16.3632	2.31739	0.0218225	0.479857	-5.43928
IL1R1	4.13355	27.5553	2.4321	0.0161784	0.441617	-5.17519
GLS	4.06716	35.3827	2.27166	0.0245165	0.498888	-5.54127
FAXDC2	4.01005	13.8128	4.0795	7.28e-05	0.100318	-0.153674
DUSP5	4.00604	22.0921	2.08248	0.0389812	0.568803	-5.94286
DNAJC10	3.97415	43.2718	1.99512	0.0478247	0.598687	-6.11718
F2R	3.9727	18.8753	3.28725	0.00125775	0.202916	-2.84449
VWF	3.96759	18.7538	2.6211	0.0096589	0.371469	-4.71442
TRPA1	3.94568	13.4651	3.32082	0.00112492	0.195238	-2.74045
ERGIC2	3.93031	42.502	3.44804	0.000731415	0.161255	-2.33794
GBP4	3.89346	20.0713	2.27778	0.0241397	0.498148	-5.52772
NID1	3.87856	23.0633	2.37532	0.0187861	0.459055	-5.30739
CD274	3.86432	10.7926	3.34287	0.00104493	0.188087	-2.67162
RNF149	3.83246	43.8604	2.0609	0.0410237	0.576109	-5.98657
ITGA5	3.81259	23.367	1.98098	0.0494052	0.601986	-6.14473
TTYH3	3.79691	30.8604	2.62615	0.00952299	0.36929	-4.70167
TP53INP1	3.78214	20.8695	2.67767	0.00823214	0.349368	-4.57038
CDC25B	3.76047	25.5001	2.61267	0.0098895	0.375567	-4.73563
ANKRD36BP2	3.75964	23.3767	2.47916	0.0142659	0.426698	-5.06342
USP53	3.75079	23.8558	2.35228	0.0199459	0.470092	-5.36021
TXNDC11	3.74884	46.5475	2.80424	0.00570522	0.307121	-4.23801
CKLF	3.72835	40.1029	2.56534	0.0112795	0.39481	-4.85366
RHBDF2	3.72458	18.9593	3.37951	0.000923662	0.177817	-2.55638
MIR4435-2HG	3.69584	24.7985	2.55538	0.0115934	0.398844	-4.87824
SVIL	3.6431	22.3203	2.46454	0.0148372	0.430518	-5.09835
NFKB2	3.63864	28.7273	2.28396	0.0237643	0.496456	-5.51401
ST3GAL1	3.63632	14.5859	3.84676	0.000175942	0.120486	-0.993937
PMP22	3.62407	41.8578	2.06341	0.0407816	0.576073	-5.98151
CCNG2	3.58221	34.7148	2.18894	0.0301331	0.526263	-5.72088
ARFGAP3	3.53779	37.8917	2.21684	0.0281249	0.516289	-5.661
CR392039.1	3.52012	11.6066	2.24282	0.0263605	0.507642	-5.60459
TXNDC15	3.51814	39.2693	2.87482	0.00462521	0.290816	-4.04665
SEC14L1	3.50635	31.4021	2.53068	0.0124057	0.407303	-4.93881
FAM46C	3.50397	31.4248	2.32258	0.0215337	0.478996	-5.42758
COL15A1	3.49927	17.3089	2.48658	0.0139835	0.424027	-5.04562
SPNS2	3.47336	23.4878	2.46626	0.0147689	0.429969	-5.09425
P4HA1	3.47016	20.8952	2.99835	0.00317412	0.263232	-3.70153
CDH3	3.46322	11.4091	2.72548	0.00717778	0.336731	-4.44645
FER1L4	3.46066	14.7136	3.15838	0.00191555	0.229255	-3.23533
PRSS23	3.45201	34.3452	2.22112	0.0278274	0.515045	-5.65175
ERLEC1	3.44175	52.0592	2.0647	0.0406576	0.576073	-5.9789
TRIB2	3.43353	17.2405	2.96896	0.00347517	0.269789	-3.7848
ITGAV	3.40559	23.6234	2.44681	0.0155575	0.438295	-5.14047
LIPG	3.38749	20.8161	2.15965	0.0323741	0.539482	-5.78299
MLKL	3.38167	20.3646	3.4134	0.000823342	0.170151	-2.44883
TNFRSF10B	3.35501	22.3857	2.8673	0.00473065	0.290816	-4.06724
FNDC3B	3.34993	24.5657	2.61745	0.00975832	0.373265	-4.72363
DERL1	3.30774	49.3226	1.98014	0.0495009	0.602118	-6.14636
IGKV1D-42	3.2995	9.69293	2.2674	0.0247816	0.500336	-5.55067
TNFRSF12A	3.27912	19.3742	2.05291	0.0418031	0.578502	-6.00265
GALNT2	3.25046	31.0476	2.17699	0.0310311	0.531634	-5.74633
CD276	3.245	29.1859	2.35137	0.0199928	0.470092	-5.36228
COL12A1	3.22853	11.0133	2.83434	0.00521927	0.295824	-4.15693
SAMD9L	3.20567	21.2279	2.59953	0.010259	0.381942	-4.76859
SEMA4D	3.18475	22.4223	2.4778	0.0143181	0.427257	-5.06667
PTK2B	3.15109	36.2746	2.27125	0.0245413	0.499047	-5.54216
TCHP	3.10098	18.09	3.35041	0.00101884	0.186131	-2.64801
ODF3B	3.06457	24.9431	2.45687	0.015145	0.433286	-5.1166
LAMA5	3.06353	21.8357	2.23351	0.0269817	0.512349	-5.62488
ITGA1	3.06319	14.7954	2.87248	0.00465776	0.290816	-4.05306
SNORA26	3.06304	25.204	2.02273	0.0448613	0.590297	-6.06284
LYN	3.04799	29.0342	2.06425	0.040701	0.576073	-5.97982
PXDN	3.01141	16.6725	2.29623	0.0230347	0.491326	-5.4867
LINC00152	2.98992	20.6859	2.24813	0.0260124	0.506689	-5.59299
LILRB3	2.96495	11.5498	2.08296	0.0389368	0.568803	-5.94188
VNN2	2.96251	11.9948	2.07976	0.0392333	0.569844	-5.94838
ALPL	2.95379	10.1535	2.19299	0.029834	0.524586	-5.71223
HAPLN3	2.94596	12.0923	3.11377	0.0022094	0.241752	-3.36742
SP140L	2.9338	21.0464	3.20186	0.00166441	0.218475	-3.105
PLPP5	2.91511	56.2271	2.14862	0.0332552	0.543593	-5.80619
PLEKHG2	2.91096	17.3392	2.71147	0.00747345	0.338829	-4.48299
SCPEP1	2.9085	31.8075	2.20181	0.0291918	0.522732	-5.69335
DENND3	2.90073	21.8905	2.40803	0.0172419	0.449071	-5.23159
DKK3	2.89383	24.0575	2.21479	0.0282687	0.517139	-5.66543
PRDM1	2.89159	20.7602	1.99607	0.0477196	0.598658	-6.11531
ADGRF1	2.89139	6.92849	4.21693	4.25e-05	0.0972934	0.361072
BCL2L1	2.8854	36.7988	2.43632	0.015998	0.44087	-5.16525
SKIL	2.8796	17.1213	2.8531	0.00493572	0.293335	-4.10598
SPRR2A	2.85875	3.08112	2.53118	0.0123887	0.407222	-4.93758
IL15RA	2.82689	22.543	2.75575	0.00657539	0.325668	-4.36699
SLC25A37	2.82354	23.9305	2.11403	0.0361519	0.558836	-5.87816
CLDND1	2.81739	37.0245	2.48111	0.0141914	0.425916	-5.05876
TUBB6	2.81453	22.7851	2.59813	0.0102993	0.381942	-4.77211
EDEM1	2.79766	25.7335	2.67806	0.00822286	0.349227	-4.56937
ELOVL5	2.78217	24.1892	2.15238	0.0329524	0.542818	-5.79829
FKBP10	2.77987	18.8146	2.98533	0.00330445	0.265645	-3.73853
PDK1	2.77098	16.9712	3.57377	0.000472456	0.149229	-1.92748
TDO2	2.74756	9.92505	2.46925	0.014651	0.429969	-5.08712
PDGFRB	2.73995	18.271	2.3334	0.020943	0.476417	-5.40314
OSMR	2.73659	11.8028	3.05256	0.0026808	0.251398	-3.546
RHOQ	2.73416	23.2211	2.49805	0.0135567	0.417731	-5.018
CADM1	2.73177	14.7001	2.94281	0.00376498	0.279828	-3.8583
MAP3K8	2.69261	15.1862	3.85695	0.000169399	0.119445	-0.957978
RP11-290F5.1	2.68048	21.2116	2.09689	0.037666	0.564065	-5.91342
PARP14	2.66879	22.2492	1.97944	0.0495805	0.602118	-6.14773
DRAM1	2.6663	15.971	3.4456	0.000737557	0.161666	-2.34578
HTRA1	2.64549	20.3331	2.43223	0.0161727	0.441617	-5.17488
FUT8	2.62985	25.9132	2.59803	0.0103022	0.381942	-4.77237
FENDRR	2.6154	23.7243	2.21031	0.0285845	0.518329	-5.67509
GLIPR1	2.60555	17.1189	2.93744	0.00382719	0.280425	-3.87332
ARRDC3	2.5942	21.7595	2.33615	0.0207952	0.476204	-5.39691
BNIP3L	2.59402	26.7067	2.1148	0.036085	0.558244	-5.87657
RP11-334E6.12	2.58989	14.9433	2.74535	0.00677691	0.329138	-4.39437
CST7	2.58476	13.4186	2.15701	0.0325831	0.540404	-5.78855
SNORA31	2.53321	16.8584	2.06796	0.0403457	0.574491	-5.97232
RGCC	2.53042	20.6307	2.89956	0.00429327	0.287505	-3.97856
GEM	2.49368	11.9772	2.09526	0.0378132	0.56457	-5.91676
MAP4K4	2.48085	16.1883	2.74031	0.00687663	0.331233	-4.40762
PITPNC1	2.47497	17.8384	2.7801	0.00612432	0.315788	-4.30246
AKAP2	2.46581	20.1897	2.12398	0.0352967	0.555064	-5.85756
TFPI	2.46511	15.4802	2.78551	0.00602796	0.313026	-4.28805
HDAC7	2.4394	21.8238	2.38323	0.0184016	0.456745	-5.28914
FGR	2.43847	13.9506	1.99306	0.0480519	0.599094	-6.1212
RAB31	2.43348	21.0062	2.26292	0.0250632	0.502053	-5.56054
VCAN	2.4148	16.6875	2.32576	0.0213587	0.478917	-5.42041
WNT5A	2.40726	8.73524	2.66402	0.00855785	0.356692	-4.6054
CD93	2.39582	12.4642	2.65985	0.00865946	0.356692	-4.61605
TMEM132A	2.39039	11.5952	2.69698	0.00779057	0.342328	-4.52058
IFNAR2	2.38205	22.6873	2.9103	0.00415616	0.284485	-3.94886
PML	2.37953	21.1114	2.09356	0.0379669	0.56457	-5.92024
TMEM92	2.36507	13.0911	2.58516	0.0106773	0.388341	-4.80447
PDE4B	2.35719	11.9257	1.97952	0.0495711	0.602118	-6.14756
PCSK1	2.31618	8.90076	1.97954	0.0495686	0.602118	-6.14752
GOLT1B	2.30362	24.0525	2.49048	0.0138371	0.421992	-5.03624
GLCCI1	2.30255	14.5702	3.0246	0.00292569	0.257866	-3.62654
TRAFD1	2.28435	22.6803	2.21135	0.0285108	0.518273	-5.67284
C4orf3	2.28087	39.1747	1.98747	0.0486742	0.600281	-6.1321
KIFC3	2.27537	12.1408	3.05538	0.00265718	0.251398	-3.53783
TRIM69	2.27509	22.5484	2.00853	0.0463655	0.595455	-6.09088
SP110	2.25963	20.8678	2.19198	0.0299086	0.524849	-5.7144
SNORD15B	2.25374	5.06899	2.1236	0.0353293	0.555064	-5.85835
HLA-J	2.24214	9.18524	2.19575	0.029632	0.523922	-5.70634
SESTD1	2.22056	14.0467	3.31179	0.00115931	0.197844	-2.76853
RDH10	2.2138	13.668	2.75177	0.00665191	0.325912	-4.37749
PPP2R5B	2.19407	14.9917	3.42729	0.000785249	0.166073	-2.40448
TRBJ1-2	2.19246	7.75771	2.1655	0.0319156	0.535963	-5.77066
LY96	2.19209	19.5982	2.12827	0.0349341	0.553968	-5.84866
GNG10	2.18891	30.1516	1.98786	0.0486312	0.600281	-6.13135
EMID1	2.17141	14.297	2.93484	0.00385762	0.280425	-3.88058
KLHL5	2.1696	13.2215	2.88757	0.00445137	0.28978	-4.01164
BACH1	2.16179	13.8768	2.68439	0.008076	0.347019	-4.55309
LUCAT1	2.15959	3.41918	4.00862	9.56e-05	0.100318	-0.413808
BNIP3	2.15297	9.00781	3.59613	0.000436606	0.149167	-1.85319
OAS2	2.15071	14.9163	2.05119	0.0419724	0.579748	-6.0061
CD38	2.14991	16.4179	2.3889	0.0181309	0.453644	-5.27605
DAPP1	2.11976	15.1069	2.84026	0.00512825	0.294017	-4.14089
LMF2	2.11095	34.6093	1.97766	0.0497826	0.602213	-6.15117
HEG1	2.10931	10.9461	2.69776	0.00777324	0.342046	-4.51856
OAS3	2.10921	13.9306	2.02126	0.0450155	0.59096	-6.06576
SCARNA21	2.10436	5.68022	2.10723	0.0367466	0.561985	-5.89219
SULF1	2.09702	14.3164	2.24163	0.0264397	0.508164	-5.6072
H19	2.08916	5.53424	3.11239	0.00221913	0.241752	-3.37148
LMCD1	2.05713	12.3557	2.51008	0.0131217	0.41426	-4.98891
NOTCH3	2.03845	8.44874	3.20409	0.00165238	0.218293	-3.09826
TMEM263	2.02868	22.443	2.32004	0.0216748	0.479591	-5.43332
IL2RA	2.02858	8.24133	3.09443	0.00234933	0.241752	-3.42418
KIAA0040	2.02576	14.5475	2.91537	0.00409281	0.283738	-3.9348
MET	2.0192	13.6607	1.99706	0.0476106	0.598147	-6.11338
C2CD4A	2.01282	5.67819	2.61882	0.00972093	0.37281	-4.72018
SLCO4A1	1.99592	12.6303	2.38146	0.0184874	0.456745	-5.29324
FBN1	1.98844	12.3699	2.59341	0.0104355	0.383063	-4.78391
CPEB4	1.98447	12.9062	2.75471	0.00659526	0.325668	-4.36973
VIP	1.98351	3.82084	3.04347	0.00275824	0.253722	-3.57225
IGSF6	1.98111	13.1363	2.23458	0.0269098	0.512287	-5.62256
SLFN11	1.9683	11.3732	3.0774	0.00247932	0.245931	-3.47391
FADS1	1.96538	8.20779	3.43345	0.000768897	0.165866	-2.38477
ANTXR1	1.95819	16.3117	2.24185	0.0264246	0.50804	-5.6067
MIR1255B2	1.95774	6.84657	2.82251	0.00540549	0.299807	-4.18887
CSRP2	1.95405	14.3982	2.03828	0.0432629	0.585569	-6.03194
TNS4	1.94309	7.08435	2.14001	0.0339567	0.546557	-5.8242
NPC1	1.94027	16.7909	2.41096	0.0171091	0.44748	-5.22475
HTRA3	1.92099	9.06127	2.50544	0.013288	0.416009	-5.00015
IRF7	1.91645	23.1578	2.12332	0.0353535	0.555173	-5.85894
RAB24	1.90517	27.3781	2.00584	0.0466551	0.595777	-6.09617
LIMS1	1.88333	19.6753	2.09235	0.0380766	0.56457	-5.92272
HYAL2	1.8794	19.5069	2.30706	0.0224072	0.484712	-5.46249
NPTX2	1.87627	2.23474	2.38211	0.0184558	0.456745	-5.29173
SMAD3	1.8741	14.5943	2.55624	0.011566	0.398404	-4.87612
ARID5A	1.86632	14.6812	2.0237	0.0447603	0.589922	-6.06092
PRRX1	1.85926	7.44976	2.21055	0.028567	0.518273	-5.67456
FERMT2	1.85277	11.8499	3.50008	0.000611233	0.158	-2.16957
NAMPTP1	1.845	6.27788	2.13102	0.0347027	0.551437	-5.84294
CPNE5	1.84111	16.6785	2.09962	0.0374216	0.563182	-5.90783
SEC24A	1.83803	16.5371	2.21789	0.0280515	0.51604	-5.65872
TIPARP	1.83598	13.5611	2.28016	0.0239949	0.497617	-5.52246
MAFF	1.83389	13.548	2.30333	0.0226214	0.487716	-5.47083
LINC00342	1.83201	8.08357	2.6583	0.00869769	0.356692	-4.62002
MDFI	1.82133	6.34843	3.24796	0.00143176	0.210534	-2.9651
SPAG4	1.79729	12.6533	2.02984	0.0441242	0.587008	-6.04874
WISP1	1.77344	4.62814	3.15885	0.00191267	0.229255	-3.23393
ELK3	1.77327	13.8148	2.46821	0.0146918	0.429969	-5.08959
KATNBL1	1.76666	24.2085	2.10345	0.0370802	0.562195	-5.89996
DPY19L1	1.765	14.5552	2.29079	0.023356	0.494711	-5.49884
CDC42EP2	1.76105	9.19919	2.72958	0.00709347	0.336211	-4.43575
TMEM39A	1.75558	20.681	2.15447	0.0327855	0.541711	-5.7939
SMIM5	1.75388	11.2282	2.19342	0.0298028	0.524586	-5.71133
RBMS1	1.75346	13.581	2.24502	0.026216	0.507441	-5.59979
TRAM2	1.74626	15.8542	2.47941	0.0142565	0.426698	-5.06283
GABRE	1.74533	11.3462	2.4303	0.0162558	0.441797	-5.17942
PLCXD1	1.74469	10.9048	2.2699	0.0246254	0.499369	-5.54515
DEGS1	1.72857	23.247	2.05305	0.0417892	0.578447	-6.00237
SHH	1.72272	6.04392	2.98185	0.00334007	0.266308	-3.74838
RAI14	1.72204	8.79508	2.96675	0.0034989	0.269789	-3.79105
ARNTL2	1.7197	7.57608	2.99199	0.00323717	0.263861	-3.71962
ADAMTS2	1.7034	6.03148	3.53991	0.000532064	0.150428	-2.03925
N4BP1	1.68004	18.4874	2.15034	0.0331161	0.543326	-5.80257
EAF2	1.66516	14.6849	2.54011	0.0120897	0.404769	-4.91574
LAX1	1.66103	9.5883	2.7268	0.00715065	0.336625	-4.44302
SPRY4	1.65828	7.48839	2.94332	0.00375909	0.279828	-3.85686
BAZ1A	1.64271	17.9076	2.10687	0.0367781	0.561985	-5.89293
CCDC3	1.64216	6.03728	3.12779	0.00211286	0.237794	-3.3261
CLDN1	1.63816	3.91992	3.57212	0.0004752	0.149229	-1.93293
BHLHA15	1.63696	10.6367	2.71394	0.00742037	0.338829	-4.47654
ADAMTS9	1.636	6.68043	3.44973	0.000727183	0.161255	-2.33251
SEMA7A	1.63083	7.35074	2.56136	0.0114038	0.396848	-4.86347
DLC1	1.62885	6.07004	3.70419	0.000296666	0.131491	-1.48863
AC092574.2	1.62429	5.45206	2.49792	0.0135618	0.417731	-5.01833
SAV1	1.62375	11.0246	3.71648	0.000283756	0.131491	-1.44658
CHST15	1.6223	10.9387	2.75417	0.00660564	0.325685	-4.37116
DENND5A	1.61983	12.806	2.02792	0.0443221	0.587655	-6.05255
DLL4	1.61026	8.75078	3.27221	0.00132191	0.202916	-2.89082
FGFR1OP2	1.60937	20.5881	2.40838	0.0172259	0.448855	-5.23077
SERPINB8	1.59408	13.7275	2.02202	0.0449354	0.5907	-6.06425
ADAMTS4	1.57952	3.98684	2.58474	0.0106899	0.388341	-4.80553
TMEM158	1.57521	8.77138	2.42503	0.0164846	0.444533	-5.19181
DHFRP1	1.57434	6.40052	3.15913	0.00191094	0.229255	-3.23309
TOR3A	1.57238	25.9302	2.21875	0.0279919	0.515967	-5.65687
STEAP4	1.56735	4.7922	2.87366	0.00464137	0.290816	-4.04984
FBXW7	1.56236	11.9754	3.43169	0.000773523	0.165866	-2.39039
CBWD3	1.56215	12.4073	3.16636	0.00186699	0.228571	-3.21153
PLXNA1	1.55766	8.37359	3.02881	0.00288752	0.256784	-3.61445
RAMP3	1.54836	14.8942	2.05903	0.0412046	0.576628	-5.99033
IKBIP	1.54724	9.74253	3.94683	0.000120908	0.107616	-0.637582
MME	1.54593	8.96752	2.18051	0.0307639	0.529849	-5.73884
SEMA4A	1.54579	11.7115	2.50731	0.0132209	0.415721	-4.99563
GYG1	1.54083	18.5872	2.01825	0.0453316	0.591129	-6.07171
RP11-611O2.3	1.54048	9.74156	2.8482	0.00500852	0.293412	-4.11934
FRG1CP	1.53868	11.2896	2.62338	0.00959745	0.371237	-4.70868
IFNAR1	1.53741	19.1465	2.24498	0.0262189	0.507441	-5.59989
LRRC8A	1.53027	13.3603	2.66021	0.00865067	0.356692	-4.61513
DLL1	1.51906	11.1162	2.44082	0.0158075	0.439486	-5.15462
RECQL	1.51666	12.9949	2.52626	0.0125563	0.40893	-4.94959
CARD11	1.51551	6.97257	2.89767	0.00431788	0.28847	-3.98379
CCR1	1.50482	8.63824	2.07765	0.0394304	0.57044	-5.95267
RP11-382A20.3	1.49094	8.35199	3.63828	0.000375879	0.143777	-1.71204
CDK2	1.48563	18.0374	2.1584	0.032473	0.540054	-5.78563
FAM111A	1.48304	18.4535	2.06413	0.040712	0.576073	-5.98005
KIAA0930	1.482	23.4068	1.99898	0.0474004	0.597829	-6.10962
JAK2	1.47674	10.5339	2.49958	0.0135007	0.417217	-5.01431
TNFAIP1	1.47022	15.8348	2.39078	0.0180415	0.45316	-5.27168
ADAM19	1.46424	10.4912	2.26651	0.0248369	0.500336	-5.55262
ABCC1	1.44954	11.7308	2.3239	0.021461	0.478917	-5.42461
IGHV3-52	1.44334	5.70018	2.39408	0.017886	0.451771	-5.26403
SLC6A6	1.44217	10.315	2.09052	0.038243	0.565021	-5.92646
ENKUR	1.43672	4.03216	3.59425	0.000439521	0.149167	-1.85945
WWTR1	1.43276	8.5924	2.94135	0.00378183	0.279828	-3.86239
CATSPERB	1.43083	7.413	2.22206	0.0277627	0.514604	-5.64972
PTPRE	1.42083	13.2143	2.01649	0.0455172	0.591835	-6.07519
RP11-689B22.2	1.41931	5.13897	3.81725	0.000196265	0.120486	-1.0976
VSIG1	1.41663	4.62668	2.09376	0.037948	0.56457	-5.91982
KDR	1.41529	5.71171	3.22579	0.00153959	0.215279	-3.0326
C1orf116	1.41156	11.1264	2.01715	0.0454476	0.591323	-6.07389
THBD	1.40731	6.99133	2.59218	0.0104713	0.383492	-4.78698
CTA-384D8.36	1.40457	10.0933	2.20776	0.0287657	0.519969	-5.68058
RP11-589N15.2	1.39686	6.88408	3.40555	0.000845624	0.171406	-2.47382
CCDC109B	1.3937	11.3296	2.68097	0.00815501	0.347953	-4.56188
HILPDA	1.38358	6.76543	2.3345	0.0208836	0.476417	-5.40064
LHFP	1.38305	11.9773	2.37016	0.0190407	0.461553	-5.31927
PCNX	1.38089	10.6057	2.18384	0.0305138	0.527619	-5.73177
CAV2	1.38085	10.6029	2.57395	0.0110144	0.392634	-4.83234
ATP2B4	1.37394	11.5893	2.32031	0.0216596	0.479591	-5.4327
CD248	1.36639	7.87582	2.76543	0.00639246	0.322233	-4.34139
SNORD17	1.36391	5.44944	2.24339	0.0263233	0.507642	-5.60336
RP11-16E12.2	1.35877	10.0992	2.49222	0.0137722	0.420891	-5.03206
LRP8	1.35845	4.94189	3.57146	0.000476313	0.149229	-1.93513
TLR4	1.35302	8.0812	2.24888	0.0259633	0.506689	-5.59135
TUBB3	1.34806	6.11518	2.64919	0.00892465	0.360958	-4.64324
RUNX1	1.34624	10.7381	2.41761	0.0168113	0.446399	-5.2092
SAA4	1.34477	3.76694	3.04988	0.00270344	0.251591	-3.55375
SNRK	1.33796	12.2888	2.36272	0.0194125	0.464994	-5.33633
DYSF	1.33677	5.74424	2.43313	0.016134	0.441228	-5.17276
PRUNE2	1.33095	8.56877	2.29461	0.02313	0.491621	-5.49032
SPG20	1.32376	9.02235	2.95335	0.00364559	0.275826	-3.82874
SNORA57	1.32064	1.71304	1.98519	0.0489298	0.60041	-6.13654
KIRREL	1.31932	7.18189	3.0438	0.00275541	0.253722	-3.5713
MFNG	1.31765	12.916	2.18631	0.0303285	0.526704	-5.72649
GPX8	1.31761	9.03121	2.68978	0.00795256	0.344752	-4.53918
LURAP1L	1.31305	12.2405	2.01562	0.045609	0.592238	-6.0769
DUSP7	1.31062	7.38128	3.88892	0.00015035	0.117321	-0.844724
EGFL7	1.30911	12.7253	2.02754	0.0443615	0.587831	-6.05331
SELE	1.30402	3.47802	2.13183	0.0346351	0.551093	-5.84126
APOBEC3G	1.30005	12.7388	2.19054	0.0300147	0.525999	-5.71747
ACVR1	1.29337	11.3334	2.6715	0.00837779	0.352323	-4.58621
C19orf66	1.29311	19.06	2.33047	0.0211017	0.47737	-5.40977
ADGRF5	1.29103	5.44392	3.34117	0.00105093	0.188087	-2.67696
SOX18	1.29045	7.49338	2.28304	0.0238203	0.496814	-5.51607
MIAT	1.28688	6.16523	2.47038	0.0146066	0.429679	-5.08442
MFAP3	1.28661	11.0576	2.24313	0.0263402	0.507642	-5.60391
LYPD5	1.28281	4.82757	2.76493	0.00640191	0.322431	-4.34273
CHSY1	1.2822	9.9494	2.27866	0.024086	0.49792	-5.52578
CDH5	1.27612	8.22366	2.38975	0.0180904	0.453644	-5.27407
USP9Y	1.26554	3.35224	2.3795	0.0185821	0.457316	-5.29776
CSGALNACT2	1.26456	9.70124	2.61255	0.00989299	0.375567	-4.73595
UNC5CL	1.25942	6.95173	2.22639	0.0274648	0.513011	-5.64033
AC103563.4	1.25478	3.32324	3.51398	0.00058242	0.157449	-2.12422
CLEC2B	1.2465	12.3057	2.01896	0.0452571	0.59096	-6.07031
LRRC32	1.24539	8.86765	2.4957	0.0136433	0.419117	-5.02367
C2CD4B	1.24225	5.11372	2.43997	0.0158434	0.439628	-5.15663
SMOX	1.24089	7.28896	2.53484	0.0122653	0.40634	-4.92864
P3H1	1.2381	12.5414	2.5534	0.0116565	0.399435	-4.8831
HSPA13	1.23583	13.3221	2.12323	0.0353608	0.555173	-5.85912
RAPGEF3	1.227	7.48936	3.08301	0.00243579	0.243466	-3.45756
PLEKHS1	1.22687	7.37912	2.32874	0.0211957	0.47798	-5.41368
ITGAM	1.22683	6.13993	2.1854	0.030397	0.526941	-5.72844
RNA5SP333	1.22533	3.29154	2.34068	0.0205534	0.474908	-5.38662
RNA5SP334	1.22533	3.29154	2.34068	0.0205534	0.474908	-5.38662
CFL2	1.22084	10.3815	2.81958	0.00545268	0.300483	-4.19679
TGFBR1	1.22064	10.7229	2.39242	0.0179644	0.452376	-5.26789
FAM65C	1.21538	8.39038	2.223	0.0276975	0.514213	-5.64768
C1QTNF5	1.21466	12.082	2.29622	0.0230355	0.491326	-5.48673
STRIP2	1.20887	3.59859	3.46659	0.000686243	0.160933	-2.27818
DCBLD1	1.20174	10.1272	2.34977	0.0200758	0.4707	-5.36593
COL5A3	1.19595	5.14286	2.94072	0.00378904	0.279828	-3.86414
LTBP2	1.19219	5.29948	2.58667	0.0106327	0.387949	-4.80071
RNF183	1.18955	4.15315	2.65888	0.00868331	0.356692	-4.61853
TMCC1	1.189	13.8429	2.0013	0.0471477	0.597633	-6.10509
CEP170	1.18832	7.58258	2.96839	0.00348133	0.269789	-3.78643
LDLRAD4	1.18571	10.7774	2.48575	0.014015	0.42454	-5.04762
PMAIP1	1.18364	5.74029	3.53625	0.00053891	0.151304	-2.05127
SPATS2	1.18063	14.369	2.41392	0.0169761	0.447108	-5.21784
MFAP2	1.17545	9.02335	2.1571	0.0325764	0.540404	-5.78837
FLT1	1.16544	6.22766	2.5581	0.0115066	0.397853	-4.87151
EOGT	1.16364	9.21224	2.86901	0.00470646	0.290816	-4.06256
BEAN1	1.16272	1.52976	5.69222	6.31e-08	0.0036939	6.66944
HIST1H2BC	1.16112	5.50594	3.39948	0.000863243	0.171443	-2.49311
INSIG2	1.16069	13.732	2.64458	0.00904153	0.362403	-4.65496
ATP8B2	1.15942	8.81746	2.60445	0.0101193	0.379871	-4.75627
MMRN1	1.15225	4.88714	2.52152	0.0127196	0.411728	-4.96113
SCARA3	1.15205	8.15855	2.21286	0.0284045	0.517934	-5.6696
GCLM	1.1433	9.30096	2.18162	0.0306803	0.528768	-5.73648
ESAM	1.14246	11.6549	2.05752	0.0413522	0.576877	-5.99339
ATP11A	1.14182	7.88994	2.25117	0.0258149	0.506615	-5.58634
SAA2-SAA4	1.13653	4.21408	2.34272	0.0204455	0.474406	-5.38199
MESDC1	1.1359	11.6265	2.07793	0.0394044	0.57044	-5.95211
IGKV1OR2-118	1.13313	2.41999	2.32931	0.0211648	0.477875	-5.4124
CMTM3	1.13093	11.7314	2.11765	0.0358385	0.557915	-5.87067
ZNF532	1.1202	9.78146	2.12149	0.0355096	0.556195	-5.86273
SLC26A4	1.11956	2.95369	2.12778	0.0349755	0.554177	-5.84968
LINC01272	1.1192	4.27928	2.53498	0.0122607	0.40634	-4.9283
ADGRL4	1.10043	6.64841	2.70327	0.00765131	0.340546	-4.50427
KRT6B	1.09916	2.48884	2.42706	0.0163959	0.443828	-5.18703
SLC12A4	1.09771	9.72402	2.42828	0.016343	0.44301	-5.18417
RIT1	1.08941	11.6289	2.70339	0.00764877	0.340546	-4.50397
NDUFA4L2	1.08861	6.63592	2.96496	0.00351816	0.270035	-3.79609
ARL5B	1.08833	9.24893	2.03181	0.0439224	0.586546	-6.04483
KBTBD2	1.07322	14.8152	2.00654	0.0465793	0.59571	-6.09479
TLR2	1.07211	4.63943	2.21213	0.0284559	0.518246	-5.67117
FOSL1	1.07025	3.86472	2.03608	0.0434855	0.585569	-6.03631
RNU6-196P	1.06991	2.32898	2.57098	0.0111049	0.393002	-4.83968
RNU2-1	1.0698	1.804	2.16871	0.0316665	0.534723	-5.76388
FAM25C	1.0674	3.05766	2.08294	0.0389381	0.568803	-5.94191
FAM92A1	1.06415	9.38362	2.94963	0.00368736	0.276665	-3.83919
ARHGEF17	1.0632	8.47018	2.47736	0.0143353	0.427387	-5.06774
CERCAM	1.0605	9.7338	2.33606	0.0208	0.476204	-5.39712
ZEB1	1.05721	6.34313	3.16443	0.00187859	0.228571	-3.21727
SLCO3A1	1.05643	8.71836	2.34007	0.020586	0.474908	-5.38802
ANKRD37	1.04811	8.58262	2.01729	0.0454328	0.591323	-6.07361
IGHV7-27	1.04757	2.61168	2.05555	0.041544	0.577451	-5.99734
FLRT3	1.04701	2.23471	3.79505	0.000213002	0.121278	-1.17516
SLC41A1	1.04242	5.59365	3.49727	0.000617223	0.158	-2.17872
WNT4	1.04197	4.70628	3.09743	0.00232709	0.241752	-3.41539
KIAA1755	1.0371	6.60392	2.06435	0.0406915	0.576073	-5.97962
RNU6-343P	1.0338	2.93662	2.32737	0.0212706	0.4786	-5.41678
CTLA4	1.0335	6.28162	2.06755	0.0403844	0.57477	-5.97314
ITPKC	1.02927	8.54174	2.09711	0.0376465	0.564065	-5.91297
MALT1	1.02573	10.7104	2.00115	0.0471636	0.597705	-6.10537
DIO2	1.02498	2.01218	3.6084	0.000418032	0.149167	-1.81224
RNF24	1.02474	5.69498	2.82463	0.00537166	0.298994	-4.18315
SIKE1	1.01988	13.7936	1.99129	0.0482486	0.599094	-6.12466
SNPH	1.01539	4.37686	2.49104	0.0138163	0.421797	-5.0349
SPRR3	1.01443	1.36076	2.32265	0.02153	0.478996	-5.42743
TPST2	1.01375	13.1944	2.54599	0.0118964	0.402878	-4.90133
SLC39A6	1.00862	11.1936	2.14985	0.0331555	0.543341	-5.80359
BMPR2	1.00478	8.17877	2.37071	0.0190131	0.46152	-5.31799
EDNRA	1.00041	4.19017	3.20758	0.00163375	0.218186	-3.08774
SRF	0.999818	13.3553	2.02663	0.0444563	0.588102	-6.05512
INSC	0.996503	6.39245	1.98577	0.0488654	0.60041	-6.13542
ANGPT2	0.996192	3.04272	3.97527	0.000108541	0.104135	-0.534906
VASN	0.995011	5.80431	2.5944	0.0104067	0.382964	-4.78143
MTSS1L	0.988552	8.53124	2.42296	0.0165752	0.444675	-5.19667
GJA4	0.986838	4.3021	3.46624	0.000687059	0.160933	-2.2793
AEN	0.984347	7.37621	2.82962	0.00529292	0.298136	-4.1697
FCN3	0.982624	2.78588	3.50762	0.000595449	0.1578	-2.145
PTPRM	0.970249	9.20554	2.23748	0.0267151	0.511106	-5.61623
KLHL2	0.969235	9.0712	2.14738	0.033355	0.543593	-5.80877
RGS16	0.969125	3.82926	2.03762	0.0433291	0.585569	-6.03324
KCNN3	0.966809	4.58379	3.1451	0.00199898	0.233063	-3.27482
CHN1	0.96292	5.3198	2.32981	0.0211372	0.477875	-5.41125
AC069257.8	0.95991	2.4306	3.18834	0.00173902	0.221331	-3.14569
RP11-378J18.9	0.959811	5.10851	2.75453	0.00659864	0.325668	-4.3702
HRH1	0.955839	5.80445	2.59176	0.0104833	0.383694	-4.78801
STMN3	0.942982	9.33488	2.16456	0.0319887	0.536108	-5.77263
HGF	0.939086	4.50063	2.06053	0.0410596	0.576109	-5.98732
CPZ	0.934133	4.71387	2.43345	0.0161204	0.441228	-5.17201
C6orf223	0.928424	3.24539	2.75359	0.00661674	0.325699	-4.37268
IL1RAP	0.927501	3.88711	3.25681	0.00139074	0.208093	-2.93806
MIR499A	0.926909	1.70705	2.75448	0.00659972	0.325668	-4.37034
SNORA71A	0.926688	3.40521	2.09976	0.0374092	0.563182	-5.90754
FAM167B	0.925541	6.542	2.87334	0.00464587	0.290816	-4.05072
GUCY1B3	0.925496	5.81922	2.34278	0.0204423	0.474406	-5.38185
CEP112	0.920335	4.45379	2.69229	0.00789585	0.343056	-4.53271
SNORA12	0.918177	3.96996	2.05616	0.0414846	0.577352	-5.99612
SAMD11	0.918024	7.94775	2.37321	0.0188897	0.459967	-5.31225
ADCY4	0.91658	8.45179	2.11006	0.0364978	0.560867	-5.88635
LDHAP4	0.916061	3.27182	3.10729	0.00225542	0.241752	-3.38648
PHTF1	0.915845	7.89944	3.03743	0.0028108	0.254121	-3.58964
PANX1	0.915654	7.5408	2.12166	0.0354949	0.556195	-5.86238
CMTM2	0.912464	2.89957	1.99546	0.0477876	0.598687	-6.11652
PXDC1	0.912208	7.20584	3.09091	0.00237572	0.241752	-3.4345
CBR3	0.911342	4.19159	2.54863	0.0118103	0.40162	-4.89483
LPL	0.910374	2.4735	3.82858	0.000188215	0.120486	-1.0579
AC013402.1	0.905728	2.50328	2.03515	0.0435803	0.585569	-6.03817
NXPE3	0.90038	6.43636	2.6048	0.0101095	0.379843	-4.75541
SGIP1	0.90006	5.0221	2.22811	0.0273478	0.51275	-5.63662
GAL	0.897617	2.95372	2.23537	0.0268565	0.512287	-5.62083
FAM83A	0.895073	1.9404	3.00952	0.00306605	0.260811	-3.66967
ARHGAP23	0.889563	5.00695	2.71858	0.00732211	0.337683	-4.46448
ROBO4	0.887738	4.55561	2.97977	0.00336156	0.266425	-3.75427
EPN2	0.886595	10.1645	2.01919	0.0452329	0.59096	-6.06986
AC013461.1	0.884233	8.07746	2.10804	0.036675	0.561729	-5.89051
FUT11	0.88234	8.69904	2.27461	0.0243342	0.498297	-5.53474
STARD3NL	0.878996	16.8606	1.99886	0.0474136	0.597829	-6.10986
LDB2	0.873893	6.60631	2.63609	0.0092607	0.365457	-4.67653
RNU6-1005P	0.868272	2.23124	2.15512	0.0327336	0.541465	-5.79253
C1DP1	0.866657	1.805	2.05727	0.0413767	0.576967	-5.99389
SLC23A2	0.864245	6.40017	2.33583	0.020812	0.476204	-5.39762
MANEA	0.864215	8.06985	2.18158	0.0306831	0.528768	-5.73656
SLC6A20	0.860526	3.98191	2.41679	0.0168477	0.446758	-5.21111
AC104699.1	0.859726	6.22988	2.07698	0.0394933	0.57044	-5.95404
PGF	0.854391	3.87223	3.10953	0.00223944	0.241752	-3.37991
CENPN	0.853725	8.82628	2.07058	0.040096	0.573175	-5.967
RP11-248B24.5	0.848748	1.92957	2.19392	0.0297659	0.524586	-5.71025
MIR378H	0.848565	1.07232	3.89538	0.000146751	0.11606	-0.82171
AGPAT4	0.845298	4.49422	2.0462	0.0424671	0.582131	-6.0161
AC095030.1	0.840812	2.17189	2.22401	0.027628	0.513954	-5.64549
NOCT	0.83941	4.39674	2.46654	0.0147579	0.429969	-5.09359
AGO2	0.839069	6.26255	2.10424	0.0370105	0.562195	-5.89834
S100PBP	0.838735	9.76495	2.08971	0.0383167	0.565133	-5.92811
TMEM106A	0.837035	5.6701	3.11053	0.00223228	0.241752	-3.37695
TMEM204	0.835334	6.39834	2.67511	0.00829238	0.350624	-4.57697
RP11-350J20.12	0.835217	2.87529	3.20941	0.00162403	0.218186	-3.08219
NOS3	0.828992	4.26492	2.55261	0.0116819	0.399807	-4.88504
GRB10	0.825454	7.14328	2.4132	0.0170085	0.447108	-5.21952
SCARNA12	0.822951	3.51003	3.4248	0.000791967	0.166073	-2.41245
NRP2	0.822308	4.96573	2.37366	0.0188676	0.459702	-5.31121
AC016821.1	0.820309	2.53633	1.97692	0.0498679	0.602396	-6.15262
SRPX2	0.819697	4.24279	2.70284	0.00766077	0.340683	-4.50539
PHLDB2	0.819625	5.09488	2.92608	0.00396182	0.282529	-3.90501
CDK17	0.814094	9.30009	2.02971	0.0441374	0.587008	-6.04899
AC006126.4	0.810601	3.69608	3.10875	0.002245	0.241752	-3.3822
RP11-49K24.6	0.809099	11.6912	1.98215	0.0492731	0.601863	-6.14246
AC024995.1	0.807811	2.03018	2.00513	0.0467321	0.596123	-6.09757
RP11-631N16.4	0.807718	5.02315	2.8392	0.00514445	0.294017	-4.14376
PRAF2	0.807183	10.5839	2.05997	0.0411138	0.576265	-5.98844
SLC7A11	0.806468	3.86894	2.09132	0.0381699	0.565021	-5.92482
AC010139.1	0.804256	1.72891	2.37837	0.018637	0.45755	-5.30036
FAM129A	0.803387	6.02261	2.05464	0.0416335	0.577634	-5.99918
C2CD2	0.802966	7.05308	2.51734	0.0128652	0.41286	-4.97129
KCTD11	0.802529	7.35217	2.51632	0.012901	0.413031	-4.97378
MNT	0.802245	8.54282	1.99081	0.0483022	0.599094	-6.1256
BBIP1	0.802111	12.9374	2.16114	0.0322572	0.538916	-5.77986
KCND3	0.800263	5.96689	1.9984	0.0474641	0.597829	-6.11076
TEAD4	0.797936	6.13026	2.31935	0.0217132	0.479707	-5.43487
SH3BP5-AS1	0.797099	6.23699	2.0684	0.0403041	0.574466	-5.97143
ANKRD36C	0.79068	3.28756	2.22828	0.0273358	0.51275	-5.63624
RIPK2	0.788704	7.86478	2.01993	0.0451552	0.59096	-6.0684
ZNF267	0.787347	7.85895	2.11082	0.0364314	0.560652	-5.88478
FAM69A	0.781165	10.0917	2.44251	0.0157367	0.438769	-5.15063
RP11-1334A24.6	0.779486	4.8494	2.03184	0.0439184	0.586546	-6.04476
S100A2	0.77946	2.32387	3.13912	0.00203771	0.234503	-3.29258
GLT8D2	0.775904	7.83653	2.07399	0.0397737	0.571752	-5.96009
AC007386.4	0.773229	4.07689	3.17039	0.00184289	0.228107	-3.19949
MIR1299	0.771977	1.91777	2.0553	0.0415691	0.577451	-5.99786
AC159540.2	0.771633	2.72394	2.87158	0.00467042	0.290816	-4.05554
CEP128	0.770622	4.5664	2.51106	0.013087	0.41426	-4.98655
TPBG	0.767488	8.36146	2.07151	0.0400081	0.572989	-5.96513
TIE1	0.764775	5.34194	2.10991	0.0365106	0.560867	-5.88665
DLGAP1-AS1	0.761161	7.34093	2.25136	0.0258024	0.506615	-5.58592
GNB4	0.760299	6.09419	2.33316	0.0209559	0.476447	-5.40368
HIVEP2	0.759476	5.03369	2.40377	0.0174364	0.449933	-5.24151
PLN	0.757279	4.03909	2.65956	0.0086666	0.356692	-4.61679
RP11-284N8.3	0.754227	5.86789	2.21629	0.0281634	0.516289	-5.66218
HOOK3	0.750666	5.9679	2.09478	0.0378566	0.56457	-5.91775
CHIC2	0.7402	10.7146	2.02809	0.0443046	0.587655	-6.05221
RP1-152L7.5	0.738362	5.06998	2.91738	0.0040679	0.283597	-3.92921
ITPRIP	0.73434	5.1957	2.09895	0.0374815	0.563182	-5.9092
CHST11	0.733598	5.99647	2.02946	0.0441632	0.587008	-6.04949
SYDE1	0.732588	4.22134	3.48722	0.000639079	0.158	-2.21139
MXD3	0.729515	9.0738	2.25804	0.0253731	0.504049	-5.57128
SMURF2	0.727218	8.89336	2.06537	0.0405936	0.575927	-5.97756
F2RL2	0.723892	3.21839	2.28124	0.0239289	0.497309	-5.52005
C11orf84	0.723157	6.81882	2.72545	0.00717848	0.336731	-4.44654
SPRR1A	0.716967	1.06643	2.12751	0.0349983	0.554177	-5.85025
ITGA8	0.716483	5.96938	1.99792	0.0475165	0.597829	-6.1117
CLDN14	0.715487	1.69589	3.35223	0.00101262	0.185776	-2.64229
XXbac-BPG116M5.17	0.714349	3.51928	2.4209	0.0166655	0.444675	-5.20148
TMEM255B	0.713395	4.56993	2.44553	0.0156105	0.438295	-5.14349
ARMCX2	0.71274	7.02261	2.31584	0.0219097	0.48042	-5.44278
BATF3	0.709834	4.4037	2.28409	0.0237567	0.496456	-5.51373
AC009948.5	0.708653	4.99311	3.16744	0.00186046	0.228571	-3.20828
SNORA2A	0.708312	2.47416	1.99672	0.0476488	0.598283	-6.11406
RHOJ	0.703015	4.94424	2.45816	0.0150931	0.433208	-5.11355
PAPD7	0.702369	8.06264	2.03527	0.0435682	0.585569	-6.03794
S1PR3	0.701338	3.54497	2.27681	0.0241987	0.498148	-5.52986
ARID3A	0.701076	5.4581	2.66446	0.00854699	0.356525	-4.60426
IL7	0.700023	6.67504	2.28143	0.0239177	0.497309	-5.51964
AC091132.2	0.699961	0.627575	4.0483	8.21e-05	0.100318	-0.268603
C11orf91	0.699947	1.38362	3.46249	0.000695993	0.160997	-2.29141
AC131011.1	0.699538	0.77411	3.17334	0.00182542	0.227348	-3.19066
FEZ1	0.699529	5.6788	2.54033	0.0120823	0.404769	-4.9152
BCAT1	0.684388	2.81207	3.18363	0.00176573	0.223191	-3.15983
RN7SL368P	0.682629	2.40262	2.227	0.0274231	0.51275	-5.63901
STX11	0.682105	4.4242	2.09499	0.0378368	0.56457	-5.9173
AMOTL2	0.681512	5.40147	2.48929	0.0138815	0.422465	-5.0391
BOC	0.675921	4.47671	2.37578	0.0187634	0.458885	-5.30633
SHCBP1	0.672563	5.3173	2.13299	0.034538	0.550634	-5.83884
MFI2-AS1	0.671985	5.89214	2.15869	0.0324505	0.540054	-5.78503
IL17A	0.669419	1.5717	3.71293	0.000287434	0.131491	-1.45876
MMRN2	0.667078	4.79738	2.29745	0.0229632	0.491326	-5.48398
RP11-223C24.1	0.663894	3.07496	2.73686	0.00694565	0.333185	-4.41667
DMWD	0.657921	10.1814	1.98235	0.0492504	0.601863	-6.14207
RP3-508I15.19	0.657085	4.78328	2.12971	0.0348131	0.552741	-5.84568
TSPAN9	0.654323	5.73941	2.25904	0.025309	0.503598	-5.56907
IL12RB1	0.651462	5.34294	2.26009	0.0252423	0.503392	-5.56676
RNU1-72P	0.65122	1.49509	2.62748	0.00948741	0.368708	-4.6983
RP11-92C4.6	0.648966	2.25903	2.91736	0.00406817	0.283597	-3.92927
LYPD1	0.648214	1.28198	4.22226	4.16e-05	0.0972934	0.381328
SLX1A-SULT1A3	0.648074	7.14222	2.03064	0.0440419	0.587008	-6.04715
CCP110	0.646683	6.21918	2.13645	0.0342504	0.548419	-5.83163
MGAM	0.646549	1.49787	2.43897	0.0158855	0.439792	-5.15899
GJA5	0.644509	1.75254	4.26573	3.5e-05	0.0972934	0.547096
HCG27	0.640848	3.68961	2.87208	0.00466341	0.290816	-4.05417
MRAS	0.639063	4.40305	2.7605	0.00648497	0.324266	-4.35443
GPR4	0.638263	2.24547	3.21995	0.0015692	0.215511	-3.0503
PDGFB	0.635842	3.91896	2.42899	0.0163123	0.442792	-5.1825
GLYATL1	0.634597	1.93879	3.58643	0.000451821	0.149167	-1.88544
RAP2B	0.629824	7.68766	2.09361	0.0379616	0.56457	-5.92013
LATS2	0.629815	4.07699	2.99457	0.00321146	0.263232	-3.71229
C19orf12	0.626081	9.44328	2.10425	0.0370094	0.562195	-5.89831
MSANTD3	0.625578	6.85975	2.50406	0.0133381	0.416319	-5.0035
CXCL17	0.623191	2.0535	2.0047	0.0467784	0.596123	-6.09841
SMARCA1	0.622847	4.19073	2.98771	0.00328017	0.264605	-3.73175
CBFA2T3	0.618426	6.66243	2.08753	0.0385156	0.566258	-5.93255
PFKFB4	0.615858	3.79737	2.33123	0.0210602	0.477029	-5.40804
FJX1	0.614117	1.86823	3.13123	0.00208974	0.236655	-3.31591
IL17RA	0.612087	5.98437	2.08655	0.0386055	0.566963	-5.93455
WFDC3	0.611525	2.97075	1.97993	0.0495246	0.602118	-6.14677
AC008746.5	0.609286	4.02628	1.99312	0.0480458	0.599094	-6.12109
WWC2	0.608868	2.97012	3.54308	0.000526187	0.150428	-2.02881
RP11-347C18.3	0.603622	1.47625	3.99383	0.000101134	0.100318	-0.467612
PTGFR	0.602282	2.97034	2.65812	0.00870196	0.356692	-4.62046
RP11-415J8.3	0.602237	4.27316	2.02996	0.044112	0.587008	-6.0485
COL27A1	0.598967	4.04794	2.12751	0.0349976	0.554177	-5.85023
EMCN	0.598841	5.49619	2.08037	0.039177	0.569355	-5.94715
SULT2B1	0.598325	1.99024	2.66182	0.00861137	0.356692	-4.61103
TK2	0.597295	8.89033	2.04805	0.0422828	0.581874	-6.01239
AC005077.9	0.595943	1.23642	2.24976	0.0259065	0.506615	-5.58943
CXorf36	0.595159	3.05305	3.28537	0.00126562	0.202916	-2.8503
VAMP4	0.59485	7.51807	2.27346	0.0244052	0.498704	-5.53729
CCDC102B	0.593201	3.45321	2.93796	0.00382117	0.280425	-3.87188
PDCD6IPP2	0.592227	1.45855	2.69346	0.00786939	0.34267	-4.52968
AC108463.2	0.59219	1.49832	4.29511	3.11e-05	0.0972934	0.659894
EHD3	0.590274	2.94244	3.22585	0.00153926	0.215279	-3.0324
AC076972.1	0.588783	1.36004	2.43317	0.0161326	0.441228	-5.17268
TNFRSF10D	0.584702	5.25891	2.28147	0.023915	0.497309	-5.51954
NSG1	0.582149	5.74887	2.09896	0.0374808	0.563182	-5.90918
LRRC8C	0.581367	3.60084	3.09946	0.00231219	0.241752	-3.40946
RP11-211G3.2	0.580943	1.52978	2.47124	0.0145729	0.429679	-5.08236
ADAMTS14	0.579744	3.31811	2.79252	0.0059053	0.309402	-4.26936
SLC1A3	0.578742	2.61693	2.2887	0.02348	0.495334	-5.50348
TTC9	0.576627	2.9233	2.85224	0.00494849	0.293335	-4.10834
ZFY	0.575452	1.72328	2.10153	0.0372505	0.5623	-5.90389
TM4SF18	0.57402	3.19458	3.04981	0.00270404	0.251591	-3.55395
FRMD4A	0.57225	6.29013	2.06124	0.0409908	0.576109	-5.98588
BTBD19	0.567076	3.70211	2.16827	0.0317006	0.534723	-5.76481
CYYR1	0.56335	5.4417	2.06668	0.0404682	0.574845	-5.97491
RP11-588K22.2	0.562036	3.50817	2.01383	0.0457997	0.592839	-6.08045
CACNA1H	0.561959	4.50431	2.21357	0.0283541	0.517934	-5.66805
PRDM15	0.560973	4.24373	2.35198	0.0199617	0.470092	-5.36091
AKT3	0.559958	4.70796	2.23	0.0272193	0.512553	-5.63252
SNTB2	0.559222	4.95192	2.09626	0.0377228	0.564482	-5.91471
ELL	0.558506	7.24544	2.18411	0.0304935	0.527619	-5.73119
RP11-67C2.2	0.556507	2.35603	2.55306	0.0116674	0.399545	-4.88393
CA9	0.555807	1.32222	2.79035	0.00594304	0.310268	-4.27515
DUOXA1	0.555742	2.57261	2.88543	0.00448008	0.290357	-4.01752
SNORA34	0.55488	1.43545	2.07713	0.0394789	0.57044	-5.95373
BCL6B	0.553936	2.74864	2.76318	0.00643462	0.323244	-4.34735
HOXB2	0.552434	4.37795	2.34984	0.0200726	0.4707	-5.36579
CLEC14A	0.550058	5.37176	2.00381	0.0468744	0.596494	-6.10015
FAM92B	0.548263	1.95121	2.56923	0.0111588	0.393294	-4.84402
MIR4260	0.548211	1.16624	2.5207	0.0127481	0.412176	-4.96313
AL162853.1	0.548053	1.77421	2.07736	0.0394578	0.57044	-5.95327
LINC01503	0.545155	2.62741	3.35245	0.00101187	0.185776	-2.6416
ORAI3	0.544463	8.35693	2.01982	0.0451661	0.59096	-6.0686
IGF2	0.540196	3.27513	2.07439	0.0397361	0.571616	-5.95929
NLGN2	0.53913	4.74131	2.07842	0.0393584	0.570207	-5.95111
FGD5	0.537956	4.22007	2.46414	0.0148532	0.430518	-5.09931
NEXN	0.536987	4.28798	2.20458	0.028993	0.521639	-5.68741
RP11-734K23.9	0.531485	3.89918	2.57028	0.0111265	0.393218	-4.84142
UCHL1	0.53076	2.62732	2.53967	0.0121044	0.404798	-4.91683
ARHGEF10	0.530483	4.99321	2.1674	0.031768	0.534723	-5.76664
SUCNR1	0.525648	1.56242	2.92941	0.00392197	0.281977	-3.89574
AC093818.1	0.523227	6.34228	2.32862	0.0212022	0.47798	-5.41395
SNORA49	0.522352	0.643516	2.39742	0.01773	0.451771	-5.25628
STAT4	0.520219	4.61369	1.99301	0.0480574	0.599094	-6.1213
KLHL21	0.516817	5.66323	2.21324	0.0283773	0.517934	-5.66876
DUSP14	0.515368	3.30303	2.79536	0.00585622	0.309094	-4.26177
AL139383.1	0.514551	1.13441	2.08553	0.0386991	0.567212	-5.93663
CDC7	0.514122	3.90475	2.4801	0.0142301	0.426422	-5.06118
Clostridiales-1	0.514011	0.990766	2.99969	0.00316098	0.263232	-3.69772
CAPN6	0.511869	2.37475	2.69666	0.00779762	0.342347	-4.52139
SRRD	0.506578	7.97634	2.16525	0.031935	0.535996	-5.77118
CCDC88A	0.504328	5.57152	1.98004	0.0495125	0.602118	-6.14656
WNT2B	0.502752	4.47618	2.43381	0.0161049	0.441228	-5.17115
GK-AS1	0.501636	1.3815	3.16351	0.00188419	0.228777	-3.22003
MIR3125	0.501509	0.82751	2.34804	0.0201661	0.471703	-5.36988
RNF144B	0.499003	2.82862	2.08613	0.0386442	0.567212	-5.93541
SHANK3	0.49868	3.16123	2.31045	0.022214	0.483831	-5.45489
NOTCH4	0.495499	3.54489	3.05604	0.00265171	0.251398	-3.53594
GPR68	0.494229	3.44488	2.43538	0.0160379	0.44087	-5.16746
EGFL6	0.49341	1.268	2.99808	0.00317671	0.263232	-3.70228
EYA3	0.493031	6.01407	2.01492	0.0456833	0.592533	-6.07829
SLC2A9	0.488667	3.12781	3.01268	0.0030362	0.260543	-3.66067
SNX25	0.488239	5.81058	2.51118	0.0130825	0.41426	-4.98624
NBPF8	0.486909	3.67407	2.16513	0.0319441	0.535996	-5.77143
AL158069.1	0.486118	0.701759	2.01615	0.0455534	0.591928	-6.07586
ARHGAP29	0.48516	3.5125	2.35745	0.0196804	0.466765	-5.34841
RNU6-646P	0.484112	0.78701	2.22554	0.0275231	0.513309	-5.64218
RP11-242C19.2	0.483176	1.33096	2.80299	0.00572625	0.307492	-4.24135
ITGB3	0.481453	3.25704	2.40206	0.0175151	0.450693	-5.2455
LRRK2	0.480826	2.58426	2.10584	0.0368685	0.562195	-5.89503
AL353805.1	0.479555	0.560209	2.44557	0.0156091	0.438295	-5.14341
KCNJ8	0.477975	2.19898	2.84904	0.00499587	0.293335	-4.11703
RNU6-540P	0.4769	0.520646	2.66078	0.00863663	0.356692	-4.61367
RP11-806H10.4	0.476098	1.24289	3.38902	0.000894422	0.172756	-2.5263
AL139147.1	0.475489	0.618414	2.30547	0.0224987	0.485885	-5.46606
ESM1	0.475236	0.732027	4.54691	1.11e-05	0.0972934	1.65121
AC012146.7	0.474707	3.28945	2.50662	0.0132455	0.41587	-4.99729
CAMSAP2	0.473395	3.61846	2.48418	0.0140743	0.424998	-5.05138
MPDZ	0.471195	2.77609	2.89553	0.00434583	0.288524	-3.9897
AKAP12	0.470215	3.49319	2.08843	0.0384336	0.56587	-5.93073
RP11-84A12.1	0.469267	2.26134	2.11259	0.0362771	0.56018	-5.88113
EXOC3L2	0.468591	3.10609	2.45483	0.0152278	0.433882	-5.12144
SNX16	0.468255	4.82666	2.12429	0.0352707	0.555064	-5.85692
TPST1	0.461038	4.18265	1.97664	0.0498997	0.602396	-6.15316
CHAC2	0.455009	5.12874	2.21817	0.028032	0.51604	-5.65812
HIP1	0.454756	3.68366	2.18273	0.0305966	0.52835	-5.73411
ZNF281	0.454593	4.32733	2.17174	0.0314324	0.533667	-5.75746
FLT4	0.453534	1.99873	2.99261	0.00323095	0.263861	-3.71785
FLVCR1	0.452064	3.99214	1.98189	0.0493025	0.601873	-6.14297
LGI2	0.452025	1.55821	3.28281	0.00127639	0.202916	-2.85819
LINC01484	0.451962	1.98334	2.37889	0.0186117	0.45755	-5.29916
RNU7-45P	0.451611	1.35609	2.07502	0.0396773	0.571376	-5.95802
STX2	0.449909	4.44727	2.18786	0.0302136	0.526704	-5.7232
RP11-667K14.13	0.448338	0.819097	2.36167	0.0194658	0.464994	-5.33874
ERG	0.446236	3.33809	2.20253	0.0291397	0.522319	-5.6918
TTTY15	0.445645	1.60098	2.08136	0.0390847	0.568803	-5.94513
AK4P1	0.444941	0.942351	2.38514	0.0183099	0.455888	-5.28472
IRAK2	0.443933	2.57341	2.27895	0.0240684	0.49792	-5.52514
HECW2	0.443879	1.07432	4.46503	1.56e-05	0.0972934	1.32409
KLHL29	0.443359	2.127	3.23909	0.00147402	0.210918	-2.99215
NRCAM	0.441355	1.22883	2.25625	0.0254873	0.504608	-5.5752
DCHS1	0.439999	3.62005	1.9862	0.0488166	0.600295	-6.13458
LINC-PINT	0.439862	3.70964	2.28247	0.0238545	0.497173	-5.51733
HEYL	0.437175	2.11133	3.60797	0.000418677	0.149167	-1.81369
CEP135	0.434186	3.65521	2.359	0.0196015	0.466136	-5.34487
EVA1A	0.431637	2.21891	2.68867	0.00797791	0.34514	-4.54205
TEK	0.431183	3.30667	2.08637	0.0386224	0.567069	-5.93493
RP11-37L2.1	0.430467	1.4327	2.8913	0.00440168	0.288524	-4.00138
CTA-384D8.35	0.430202	2.65194	2.29887	0.0228806	0.490365	-5.48082
TNFSF14	0.429573	2.05238	2.41475	0.0169388	0.447108	-5.21589
RP11-19N8.4	0.42876	1.82563	2.49939	0.0135078	0.417217	-5.01478
CCR10	0.42816	2.54123	2.0993	0.03745	0.563182	-5.90848
EPDR1	0.427372	3.49049	2.10434	0.0370013	0.562195	-5.89812
ZDHHC19	0.426054	0.871342	2.52154	0.012719	0.411728	-4.96109
CD80	0.425943	2.07164	2.64813	0.00895154	0.361492	-4.64595
AC093673.5	0.424949	4.29676	2.21622	0.0281681	0.516289	-5.66233
GMPR	0.423931	3.70669	2.23423	0.0269334	0.512287	-5.62332
BICD1	0.420883	3.5909	2.35019	0.0200541	0.470588	-5.36497
GTF2IP7	0.420861	1.75959	2.44107	0.0157973	0.439433	-5.15405
RP11-1112G13.3	0.420482	0.32836	3.93788	0.000125068	0.107616	-0.66975
AHNAK2	0.419557	1.81183	2.87614	0.0046069	0.290816	-4.04303
DMD	0.416976	3.64368	2.23105	0.0271475	0.512553	-5.63022
DENND5B	0.414335	3.82376	2.2481	0.0260144	0.506689	-5.59306
RUNX2	0.413861	4.12413	2.24367	0.0263045	0.507642	-5.60273
SNORA23	0.408284	0.804119	2.63153	0.00938024	0.367656	-4.68808
RNF215	0.40779	5.34529	2.20955	0.028638	0.518574	-5.67671
CHRM3	0.40766	2.48689	2.12655	0.035079	0.554255	-5.85223
SYT11	0.407529	3.26211	2.05607	0.0414931	0.577352	-5.99629
AC016739.1	0.4068	0.566496	2.51547	0.0129308	0.413491	-4.97583
SH3RF3	0.405455	2.38097	3.30999	0.00116629	0.197844	-2.77413
CNTNAP1	0.404935	3.01112	2.45069	0.0153971	0.435656	-5.13126
ARHGEF15	0.402865	2.75102	2.30046	0.0227882	0.490314	-5.47727
SLC4A11	0.401981	1.77057	2.43659	0.0159866	0.44087	-5.16461
RP11-625L16.3	0.401741	1.03381	2.46856	0.0146782	0.429969	-5.08877
FAM25BP	0.40083	0.994708	2.01204	0.0459894	0.593522	-6.08396
AC035144.1	0.400032	0.452623	2.05428	0.0416686	0.577871	-5.9999
RP11-37B2.1	0.399911	2.61073	3.02889	0.00288679	0.256784	-3.61421
CLSPN	0.399723	2.71497	2.11757	0.0358455	0.557915	-5.87084
RN7SKP16	0.396965	1.24336	3.04653	0.002732	0.252587	-3.56343
BMP6	0.396584	2.91311	2.19428	0.0297394	0.524586	-5.70948
SAMD14	0.396441	2.09331	3.1024	0.00229075	0.241752	-3.40085
HIST1H2BJ	0.396172	3.55365	2.00905	0.0463097	0.595455	-6.08986
CACNA1C	0.396082	1.63718	3.15452	0.0019395	0.229771	-3.24684
MAPK11	0.395292	3.4424	2.15012	0.0331339	0.543326	-5.80303
RORA	0.395112	3.04294	2.15323	0.0328847	0.542583	-5.79651
DSTNP1	0.393866	2.77796	2.00021	0.0472663	0.597829	-6.10722
RAPGEF4	0.39104	1.77331	3.55828	0.000498898	0.149229	-1.97872
DPY19L2	0.38572	3.04218	2.3976	0.0177215	0.451771	-5.25586
APBA2	0.385416	1.84242	2.48392	0.0140844	0.424998	-5.05202
AL138963.1	0.383774	0.842184	2.10696	0.0367701	0.561985	-5.89274
SERPINB9P1	0.381747	2.13409	1.98952	0.048445	0.599674	-6.12811
RP11-79H23.3	0.3788	1.14582	3.10233	0.00229124	0.241752	-3.40105
SLC8A1	0.37742	2.51812	2.06131	0.0409846	0.576109	-5.98575
RNU6-395P	0.376525	0.415554	2.25253	0.0257269	0.505963	-5.58336
RNU4-72P	0.376501	0.795518	2.71738	0.0073473	0.338311	-4.46759
TRBV11-2	0.375788	1.49089	1.98423	0.0490382	0.600651	-6.13841
RP11-180M15.7	0.375149	2.95994	2.12181	0.0354823	0.556195	-5.86207
LDLRAD3	0.374686	2.40495	2.20917	0.0286649	0.518574	-5.67753
RP11-386I14.4	0.373376	1.75291	2.22607	0.027487	0.513011	-5.64104
DZIP1	0.373183	2.77978	2.71488	0.0074005	0.338829	-4.47412
HCG4P7	0.372956	2.14802	2.55128	0.0117248	0.40034	-4.88833
ABLIM3	0.37201	3.87419	2.10177	0.0372291	0.562299	-5.9034
PCDH17	0.370555	1.66528	2.83357	0.00523123	0.296085	-4.15901
MIR6793	0.368898	0.600117	2.34116	0.0205278	0.474908	-5.38552
TNFSF15	0.36849	2.23057	2.00466	0.0467823	0.596123	-6.09848
RP11-736N17.8	0.368025	2.03252	1.99374	0.0479775	0.599094	-6.11989
MAP3K7CL	0.366243	3.17222	2.05157	0.0419354	0.579748	-6.00535
ARL10	0.366221	2.11453	2.58012	0.0108277	0.389718	-4.81702
CHST3	0.365704	2.09083	2.63726	0.00923007	0.365007	-4.67355
TARSL2	0.364824	4.83149	2.27711	0.0241808	0.498148	-5.52921
LINC01235	0.36481	1.4087	2.00026	0.0472605	0.597829	-6.10711
STARD8	0.364789	2.38234	3.0288	0.00288759	0.256784	-3.61447
ZNF215	0.364118	2.97093	2.49113	0.013813	0.421797	-5.03469
RP3-402G11.25	0.36387	1.92172	2.91915	0.00404617	0.283597	-3.9243
TGFB2	0.363149	1.20789	3.78299	0.000222652	0.122929	-1.21713
DNA2	0.361298	3.06042	2.01368	0.0458154	0.592839	-6.08074
PLEKHN1	0.358965	1.74603	2.72644	0.00715806	0.336625	-4.44396
MIR548F4	0.358484	0.27303	2.98051	0.00335389	0.266425	-3.75217
CREB5	0.357987	1.56479	2.00224	0.0470453	0.597326	-6.10324
VEGFC	0.354725	2.01935	3.05694	0.00264421	0.251398	-3.53332
ZNF185	0.353719	3.12538	2.06798	0.0403439	0.574491	-5.97228
ZEB1-AS1	0.35243	2.26677	3.18709	0.00174606	0.221331	-3.14944
AC108218.1	0.351616	0.55347	1.99844	0.0474594	0.597829	-6.11068
IFNG	0.351032	1.04828	2.67369	0.00832583	0.351022	-4.5806
AL023875.1	0.350807	1.94707	2.52284	0.0126741	0.411392	-4.95793
PTPN13	0.350142	2.10404	2.57582	0.0109574	0.392478	-4.82769
BMP8A	0.349197	1.23881	3.98686	0.00010386	0.101305	-0.492938
IQCJ-SCHIP1	0.348687	2.30401	2.27474	0.024326	0.498297	-5.53445
DCUN1D3	0.346685	2.68612	2.41326	0.0170055	0.447108	-5.21937
HM13-IT1	0.346248	1.72002	2.46762	0.0147154	0.429969	-5.09102
VAT1L	0.344845	3.17895	1.97864	0.0496706	0.602213	-6.14926
FOXL1	0.341359	2.90761	2.18383	0.0305141	0.527619	-5.73178
AL137224.1	0.340196	0.412781	2.42289	0.0165781	0.444675	-5.19683
PEAR1	0.340105	2.65747	2.76415	0.00641637	0.322605	-4.34477
CTD-2349P21.7	0.34006	1.18798	2.30545	0.0224993	0.485885	-5.46608
EGFLAM	0.338768	2.34807	2.08427	0.0388157	0.567913	-5.93921
GJC1	0.338458	1.67503	3.04067	0.00278254	0.254049	-3.58033
MB21D1	0.337026	3.2758	1.98801	0.048614	0.600281	-6.13106
MID1IP1-AS1	0.336362	2.04905	2.13703	0.0342026	0.548103	-5.83043
RASSF8	0.336096	1.97716	2.19924	0.0293775	0.522972	-5.69885
DNAJB5	0.334157	3.05163	2.12202	0.0354642	0.556137	-5.86163
ADAMTS7	0.333847	2.11187	2.21024	0.0285894	0.518329	-5.67524
RNU6-1333P	0.332299	0.400389	2.40244	0.0174976	0.450693	-5.24461
AC093616.4	0.331927	1.05139	3.83562	0.00018337	0.120486	-1.03316
UBASH3B	0.330497	2.69143	2.09003	0.0382869	0.565126	-5.92745
CDYL2	0.328318	1.68965	3.24375	0.00145165	0.210652	-2.97793
RP11-702B10.2	0.327718	0.278066	4.03209	8.74e-05	0.100318	-0.328066
RASIP1	0.327642	2.66594	2.1469	0.033394	0.543593	-5.80978
RP1-151F17.1	0.327275	1.98038	3.20813	0.00163082	0.218186	-3.08607
CFAP69	0.325713	2.26105	2.14291	0.0337189	0.545643	-5.81814
AC068799.1	0.325647	0.502996	2.05852	0.0412549	0.576643	-5.99137
B3GNT9	0.323294	3.70897	2.11184	0.0363425	0.560366	-5.88268
SNORA16A	0.323128	0.246412	2.02346	0.0447855	0.589922	-6.0614
PDCD1LG2	0.322341	2.49738	2.16976	0.031585	0.534662	-5.76165
PRKAA2	0.322339	1.31513	2.59244	0.0104635	0.38347	-4.78632
PSMC3IP	0.322224	3.07437	2.4107	0.0171207	0.44748	-5.22534
ERO1B	0.321511	3.66607	2.21219	0.0284516	0.518246	-5.67104
RNA5SP436	0.321128	0.314852	2.44175	0.0157685	0.439027	-5.15242
SNAPC1	0.320985	2.55065	3.06936	0.00254297	0.24887	-3.49731
AMIGO2	0.320767	2.42642	2.43587	0.0160173	0.44087	-5.16631
LINC00888	0.319705	3.28457	2.9909	0.00324803	0.26394	-3.7227
IL22	0.319479	0.789897	2.43538	0.0160381	0.44087	-5.16746
AP002495.1	0.319455	0.654147	2.03299	0.0438012	0.586327	-6.04248
MIR4479	0.319216	0.821098	2.0001	0.0472785	0.597829	-6.10744
CENPQ	0.318841	3.29664	2.28566	0.023662	0.496214	-5.51023
CSPG4	0.318558	1.6015	2.82824	0.00531464	0.298402	-4.17343
LAYN	0.318265	3.0839	2.40606	0.0173316	0.449325	-5.23618
DDIAS	0.317476	2.39468	2.35939	0.0195817	0.466136	-5.34397
SLC35B4	0.316782	3.25658	2.12314	0.0353684	0.555173	-5.8593
CALM2P2	0.316346	2.18572	2.22674	0.0274411	0.512924	-5.63958
AC012360.6	0.315992	1.31641	2.47074	0.0145926	0.429679	-5.08357
RNU6-45P	0.314691	0.459147	2.13329	0.0345129	0.550634	-5.83821
BRCA2	0.312554	2.40207	2.24222	0.0264007	0.507914	-5.60591
POLR3GP1	0.312187	0.82752	2.75131	0.0066608	0.325912	-4.3787
LINC00094	0.311324	3.90897	2.00811	0.0464108	0.595516	-6.09171
RP1-134E15.3	0.311122	0.956143	3.30133	0.00120038	0.199577	-2.80099
RP11-144A16.8	0.31001	1.25729	2.03188	0.0439144	0.586546	-6.04468
GABRR2	0.309907	1.16875	3.54241	0.000527437	0.150428	-2.03104
RN7SL145P	0.309603	1.43248	2.43502	0.0160532	0.441077	-5.1683
FLJ22447	0.309092	2.29971	2.53695	0.0121949	0.405937	-4.92349
CTD-3088G3.8	0.309047	1.01598	2.99472	0.00320994	0.263232	-3.71185
STON1	0.30738	2.33745	2.21754	0.0280762	0.51621	-5.65949
GLT1D1	0.307361	0.945518	2.16445	0.0319975	0.536108	-5.77287
LINC01237	0.307207	1.27906	2.69349	0.00786866	0.34267	-4.52959
SEMA3A	0.306496	1.53153	2.75152	0.00665673	0.325912	-4.37815
HACD1	0.305523	2.74044	2.00801	0.0464214	0.59552	-6.0919
RNU6-838P	0.305507	0.360799	2.19387	0.02977	0.524586	-5.71037
AC245036.1	0.305381	0.509493	2.31486	0.0219643	0.481078	-5.44497
GALNT14	0.304567	1.12478	2.9344	0.00386282	0.280425	-3.88182
NLGN4Y	0.304041	0.641982	2.8076	0.00564898	0.305264	-4.22899
SP5	0.30151	1.66222	2.24957	0.0259187	0.506615	-5.58984
AC121251.1	0.300617	1.35163	2.2285	0.027321	0.51275	-5.63576
ETV5	0.299855	2.98839	2.2725	0.0244642	0.498888	-5.5394
ADAMTS12	0.298188	0.992069	3.18203	0.00177489	0.223866	-3.16463
IL17C	0.298182	0.584618	3.61477	0.000408697	0.149167	-1.79095
TRMT2B-AS1	0.297508	0.776284	2.43357	0.0161154	0.441228	-5.17173
LINGO1	0.297211	1.20609	3.59524	0.00043798	0.149167	-1.85615
DYRK3	0.294868	1.69668	2.79584	0.00584803	0.309094	-4.2605
AL355531.1	0.293152	0.290337	2.12888	0.0348826	0.553393	-5.84739
WISP1-OT1	0.292642	0.692218	2.56634	0.0112483	0.394398	-4.85118
KB-1507C5.4	0.292588	1.09537	2.19859	0.0294247	0.523096	-5.70025
RP11-141M1.3	0.290484	1.24057	2.75714	0.00654877	0.325668	-4.36331
MAP1B	0.290139	1.36853	2.91376	0.00411275	0.283738	-3.93925
MPP6	0.289576	1.63036	2.54261	0.0120071	0.403888	-4.90962
TRAJ58	0.288451	0.367643	1.99704	0.0476134	0.598147	-6.11343
CDR2L	0.287318	2.17379	2.60846	0.0100066	0.378299	-4.74621
RP5-1198O20.4	0.286153	1.65889	2.13469	0.0343963	0.550002	-5.83529
TMEM217	0.285726	1.4211	2.17758	0.0309858	0.53117	-5.74507
RP11-356I2.4	0.285339	2.37128	2.4056	0.0173525	0.449325	-5.23725
SGTB	0.284466	2.37672	2.10707	0.03676	0.561985	-5.8925
RNA5SP295	0.283843	0.29309	2.50983	0.0131306	0.41426	-4.98952
MIR367	0.283649	0.331564	2.88556	0.00447842	0.290357	-4.01718
SLC23A1	0.282761	1.49276	2.84988	0.00498349	0.293335	-4.11477
ZSWIM4	0.282435	2.68387	2.00003	0.0472856	0.597829	-6.10756
CACNA2D1	0.282114	1.91249	2.04592	0.0424954	0.582131	-6.01667
MIR143HG	0.280256	1.71602	1.98466	0.0489895	0.60041	-6.13757
RP11-147I3.1	0.279705	2.29079	2.33241	0.0209965	0.476447	-5.40538
RNF217	0.279168	2.33562	2.02974	0.044135	0.587008	-6.04895
RP11-407N17.3	0.278769	0.844632	2.28789	0.0235287	0.495509	-5.50529
PAPPA	0.277867	0.878518	2.98894	0.00326774	0.264605	-3.72826
RNA5SP179	0.277257	0.285524	2.10343	0.0370816	0.562195	-5.89999
AP005901.1	0.277257	1.35158	2.26613	0.0248612	0.500336	-5.55347
HS3ST3A1	0.277025	1.36439	2.1968	0.0295553	0.523393	-5.70409
ZNF385D	0.276501	1.42373	2.11557	0.0360186	0.558081	-5.87498
PCAT19	0.27559	2.17201	2.07685	0.039505	0.57044	-5.95429
IGLL3P	0.275019	0.698049	2.0795	0.0392581	0.569844	-5.94892
XKR6	0.274239	3.20871	2.52121	0.0127304	0.411848	-4.96189
LINC00920	0.272804	1.12125	3.20583	0.00164307	0.218186	-3.09302
RNA5SP449	0.272107	0.370353	2.11545	0.0360289	0.558081	-5.87523
RN7SL48P	0.270409	1.3453	2.2312	0.0271377	0.512553	-5.6299
CTD-2373N4.3	0.267028	1.16711	2.86733	0.00473024	0.290816	-4.06716
TMEM110-MUSTN1	0.266562	1.30679	2.86889	0.00470826	0.290816	-4.06291
WNT2	0.266247	0.679767	2.73939	0.00689493	0.331496	-4.41003
ADAM12	0.264415	1.09817	2.30353	0.0226103	0.487716	-5.4704
AGO3	0.264359	2.56377	2.00045	0.0472402	0.597829	-6.10675
CPA6	-0.263212	0.882675	-2.89208	0.00439128	0.288524	-3.99921
RP11-703I16.1	-0.263963	1.33331	-2.32965	0.0211462	0.477875	-5.41163
TMEM191B	-0.264837	1.23329	-2.04174	0.0429137	0.583612	-6.02503
FAM163B	-0.265263	0.314194	-2.09052	0.0382425	0.565021	-5.92645
CACNA2D4	-0.265499	3.1562	-2.26682	0.0248179	0.500336	-5.55195
B4GALT1-AS1	-0.265528	1.77283	-2.46612	0.0147746	0.429969	-5.09459
ZC2HC1C	-0.267566	1.87081	-2.71187	0.00746482	0.338829	-4.48195
MIR4648	-0.268997	0.538991	-2.22721	0.0274091	0.51275	-5.63857
ASTE1	-0.26904	3.58442	-2.22172	0.027786	0.514604	-5.65045
AQP11	-0.269172	1.30231	-3.10385	0.0022802	0.241752	-3.39658
RP11-7I15.3	-0.26958	0.201259	-2.4928	0.0137508	0.420629	-5.03067
RP5-997D16.2	-0.269735	2.33543	-2.31613	0.0218934	0.480244	-5.44213
SIGLEC17P	-0.270141	1.2969	-2.20016	0.0293113	0.522732	-5.69689
CIDECP	-0.271566	5.05787	-2.10408	0.0370244	0.562195	-5.89866
RP11-644F5.10	-0.273045	1.61854	-2.61296	0.00988167	0.375567	-4.73492
ZNF711	-0.274469	2.08584	-2.60012	0.0102422	0.381942	-4.76712
RNU6-176P	-0.275439	0.309568	-2.34724	0.0202082	0.47212	-5.37171
CTC-429P9.3	-0.276251	2.63034	-2.14812	0.0332954	0.543593	-5.80723
[truncated: 6,798 more rows]
