# Supplementary material for: Comprehensive analysis reveals key genes and environmental toxin exposures underlying treatment response in ulcerative colitis based on in-silico analysis and Mendelian randomization
Source: Aging (Albany NY). 2023 Dec 4;15(23):14141–71. doi: 10.18632/aging.205294 (PMC10756092; doi:10.18632/aging.205294)
Supplement: Supplementary Table 3 [file aging-15-205294-s004.xls]

## Sheet: Supplementary Table 3
Supplementary Table 3. The immunocyte types demonstrating significant differences in infiltration levels between UC patients with high and low DAPP1 (ELL2) after treatment with 5-ASA, corticosteroid, golimumab, or infliximab.
Label	5ASA-DAPP1			5ASA-ELL2			Corticosteriods-DAPP1			Corticosteriods-ELL2			Golimumab-DAPP1			Golimumab-ELL2			Infliximab-DAPP1			Infliximab-ELL2
	Lower expression level(Mean±std)	Higher expression level(Mean±std)	P value	Lower expression level(Mean±std)	Higher expression level(Mean±std)	P value	Lower expression level(Mean±std)	Higher expression level(Mean±std)	P value	Lower expression level(Mean±std)	Higher expression level(Mean±std)	P value	Lower expression level(Mean±std)	Higher expression level(Mean±std)	P value	Lower expression level(Mean±std)	Higher expression level(Mean±std)	P value	Lower expression level(Mean±std)	Higher expression level(Mean±std)	P value	Lower expression level(Mean±std)	Higher expression level(Mean±std)	P value
Bcell	Low(0.11±0.05)	High(0.13±0.04)	0.02	Low(0.12±0.05)	High(0.12±0.04)	0.74	Low(0.11±0.05)	High(0.12±0.04)	0.04	Low(0.11±0.05)	High(0.11±0.04)	0.7	High(0.13±0.05)	Low(0.14±0.04)	0.01	Low(0.14±0.04)	High(0.13±0.05)	0.06	Low(0.07±0.03)	High(0.09±0.02)	0.05	Low(0.07±0.04)	High(0.09±0.02)	0.31
CD4_naive	Low(2.7e-3±1.7e-3)	High(5.6e-3±2.6e-3)	8.1e-05	Low(3.3e-3±2.3e-3)	High(5.2e-3±2.7e-3)	0.0077	Low(3.5e-3±2.0e-3)	High(5.3e-3±2.7e-3)	3.6e-05	Low(3.8e-3±2.4e-3)	High(5.0e-3±2.5e-3)	0.0014	Low(2.0e-3±2.2e-3)	High(2.8e-3±1.7e-3)	0.00056	Low(1.6e-3±1.8e-3)	High(3.2e-3±2.0e-3)	1.5e-07	Low(1.9e-3±1.6e-3)	High(2.7e-3±1.7e-3)	0.09	Low(2.0e-3±1.9e-3)	High(2.7e-3±1.3e-3)	0.05
CD4_T	Low(0.09±0.04)	High(0.12±0.04)	0.0039	Low(0.09±0.04)	High(0.12±0.04)	0.02	Low(0.10±0.03)	High(0.12±0.04)	0.0014	Low(0.10±0.04)	High(0.12±0.04)	0.01	Low(0.07±0.04)	High(0.09±0.03)	0.00049	Low(0.07±0.04)	High(0.10±0.03)	2.9e-05	Low(0.07±0.03)	High(0.09±0.03)	0.14	Low(0.08±0.03)	High(0.08±0.03)	0.41
CD8_naive	Low(5.4e-3±3.0e-3)	High(4.4e-3±2.2e-3)	0.31	Low(5.3e-3±3.0e-3)	High(4.5e-3±2.2e-3)	0.49	Low(3.6e-3±2.0e-3)	High(3.0e-3±2.0e-3)	0.06	Low(3.7e-3±2.0e-3)	High(2.9e-3±2.1e-3)	0.0064	Low(3.2e-3±1.6e-3)	High(2.5e-3±2.0e-3)	0.005	Low(3.4e-3±1.8e-3)	High(2.4e-3±1.8e-3)	0.00033	Low(4.6e-3±3.9e-3)	High(4.3e-3±3.1e-3)	0.81	Low(4.7e-3±4.2e-3)	High(4.2e-3±2.8e-3)	0.84
CD8_T	Low(0.12±0.03)	High(0.12±0.05)	0.58	Low(0.12±0.04)	High(0.12±0.04)	0.72	Low(0.09±0.04)	High(0.10±0.05)	0.72	Low(0.11±0.04)	High(0.08±0.04)	0.00062	Low(0.08±0.03)	High(0.08±0.03)	0.43	Low(0.08±0.03)	High(0.07±0.03)	0.01	Low(0.11±0.04)	High(0.12±0.03)	0.33	Low(0.11±0.05)	High(0.12±0.02)	0.63
Central_memory	Low(2.2e-3±1.7e-3)	High(3.6e-3±1.9e-3)	0.01	Low(2.5e-3±2.0e-3)	High(3.3e-3±1.7e-3)	0.08	Low(1.9e-3±1.5e-3)	High(3.0e-3±2.2e-3)	0.0019	Low(2.4e-3±2.0e-3)	High(2.6e-3±1.9e-3)	0.35	Low(3.5e-3±2.5e-3)	High(3.6e-3±2.4e-3)	0.45	Low(3.9e-3±2.8e-3)	High(3.2e-3±2.0e-3)	0.11	Low(4.4e-3±2.7e-3)	High(5.6e-3±3.0e-3)	0.21	Low(5.0e-3±2.8e-3)	High(5.0e-3±3.0e-3)	0.96
Cytotoxic	Low(3.4e-3±2.4e-3)	High(1.9e-3±2.4e-3)	0.0033	Low(3.4e-3±2.8e-3)	High(1.8e-3±1.9e-3)	0.01	Low(2.3e-3±1.8e-3)	High(2.0e-3±1.8e-3)	0.15	Low(2.4e-3±2.0e-3)	High(1.9e-3±1.6e-3)	0.14	Low(1.3e-3±9.3e-4)	High(1.4e-3±9.0e-4)	0.53	Low(1.3e-3±9.2e-4)	High(1.3e-3±9.1e-4)	1	Low(6.5e-3±3.5e-3)	High(6.1e-3±2.6e-3)	0.72	Low(6.1e-3±3.6e-3)	High(6.5e-3±2.5e-3)	0.76
DC	Low(0.06±0.02)	High(0.07±0.02)	0.06	Low(0.06±0.02)	High(0.07±0.02)	0.05	Low(0.06±0.02)	High(0.06±0.02)	0.85	Low(0.06±0.02)	High(0.06±0.02)	0.48	Low(0.08±0.02)	High(0.08±0.03)	0.25	Low(0.08±0.02)	High(0.08±0.02)	0.64	Low(0.14±0.04)	High(0.13±0.02)	0.12	Low(0.14±0.04)	High(0.14±0.02)	0.35
Effector_memory	Low(7.7e-5±2.7e-4)	High(0.0e+0±0.0e+0)	0.15	Low(7.4e-5±2.7e-4)	High(0.0e+0±0.0e+0)	0.17	Low(0.0e+0±0.0e+0)	High(0.0e+0±0.0e+0)	NaN	Low(0.0e+0±0.0e+0)	High(0.0e+0±0.0e+0)	NaN	Low(2.5e-3±2.2e-3)	High(7.0e-4±1.2e-3)	8.7e-09	Low(2.5e-3±2.0e-3)	High(6.7e-4±1.4e-3)	8e-11	Low(3.3e-3±2.6e-3)	High(2.2e-3±2.0e-3)	0.11	Low(3.1e-3±2.4e-3)	High(2.4e-3±2.3e-3)	0.28
Exhausted	Low(6.3e-3±3.0e-3)	High(6.3e-3±2.9e-3)	0.85	Low(6.6e-3±3.3e-3)	High(6.0e-3±2.4e-3)	0.94	Low(5.8e-3±2.5e-3)	High(5.9e-3±3.3e-3)	0.89	Low(6.5e-3±2.7e-3)	High(5.2e-3±2.9e-3)	0.0041	Low(4.2e-3±2.5e-3)	High(5.9e-3±2.9e-3)	0.00011	Low(4.0e-3±2.3e-3)	High(6.1e-3±2.9e-3)	3e-06	Low(2.5e-3±2.2e-3)	High(3.7e-3±1.9e-3)	0.04	Low(2.5e-3±2.3e-3)	High(3.7e-3±1.8e-3)	0.04
Gamma_delta	Low(0.11±0.06)	High(0.09±0.04)	0.36	Low(0.10±0.06)	High(0.09±0.04)	0.71	Low(0.11±0.04)	High(0.09±0.04)	0.0023	Low(0.11±0.04)	High(0.09±0.04)	0.00022	Low(0.14±0.04)	High(0.12±0.04)	0.002	Low(0.14±0.03)	High(0.13±0.04)	0.13	Low(0.07±0.06)	High(0.05±0.04)	0.14	Low(0.07±0.06)	High(0.05±0.03)	0.22
iTreg	Low(5.3e-3±3.0e-3)	High(0.01±4.0e-3)	0.01	Low(6.0e-3±3.7e-3)	High(9.6e-3±4.1e-3)	0.0026	Low(6.1e-3±2.6e-3)	High(8.6e-3±3.6e-3)	3.1e-05	Low(6.5e-3±3.3e-3)	High(8.1e-3±3.3e-3)	0.0039	Low(2.1e-3±1.4e-3)	High(2.9e-3±1.1e-3)	5.6e-05	Low(2.3e-3±1.3e-3)	High(2.7e-3±1.3e-3)	0.05	Low(2.5e-3±1.7e-3)	High(3.7e-3±1.7e-3)	0.02	Low(2.9e-3±2.0e-3)	High(3.3e-3±1.6e-3)	0.3
Macrophage	Low(0.06±0.03)	High(0.05±0.02)	3.2e-05	Low(0.06±0.02)	High(0.05±0.02)	0.18	Low(0.06±0.02)	High(0.06±0.02)	0.27	Low(0.06±0.02)	High(0.06±0.02)	0.02	Low(0.11±0.04)	High(0.14±0.05)	0.00051	Low(0.10±0.03)	High(0.15±0.05)	1.3e-09	Low(0.08±0.04)	High(0.09±0.04)	0.47	Low(0.08±0.04)	High(0.10±0.04)	0.28
MAIT	Low(5.9e-3±2.0e-3)	High(5.9e-3±2.9e-3)	0.0094	Low(6.1e-3±2.7e-3)	High(5.7e-3±2.3e-3)	0.92	Low(4.6e-3±2.2e-3)	High(4.7e-3±2.4e-3)	0.96	Low(5.2e-3±2.3e-3)	High(4.2e-3±2.2e-3)	0.0045	Low(1.4e-4±3.4e-4)	High(1.2e-4±3.3e-4)	0.82	Low(1.1e-4±3.2e-4)	High(1.5e-4±3.6e-4)	0.49	Low(0.01±5.0e-3)	High(0.01±3.5e-3)	0.68	Low(0.01±5.2e-3)	High(0.01±3.2e-3)	0.76
Monocyte	Low(0.12±0.04)	High(0.10±0.03)	0.89	Low(0.12±0.04)	High(0.11±0.03)	0.06	Low(0.10±0.03)	High(0.08±0.03)	6.9e-07	Low(0.11±0.03)	High(0.08±0.03)	4.8e-08	Low(0.09±0.03)	High(0.07±0.02)	0.0022	Low(0.09±0.03)	High(0.07±0.02)	9e-07	Low(0.11±0.05)	High(0.13±0.03)	0.09	Low(0.11±0.05)	High(0.13±0.03)	0.09
Neutrophil	Low(0.14±0.03)	High(0.14±0.06)	0.0018	Low(0.14±0.04)	High(0.15±0.05)	0.41	Low(0.19±0.06)	High(0.21±0.09)	0.21	Low(0.17±0.06)	High(0.22±0.09)	0.00017	Low(0.17±0.06)	High(0.17±0.06)	0.65	Low(0.18±0.06)	High(0.16±0.06)	0.02	Low(0.19±0.12)	High(0.12±0.08)	0.02	Low(0.19±0.13)	High(0.12±0.08)	0.09
NK	Low(0.06±0.02)	High(0.06±0.02)	0.7	Low(0.06±0.03)	High(0.06±0.02)	0.68	Low(0.06±0.02)	High(0.06±0.02)	0.43	Low(0.06±0.02)	High(0.06±0.02)	0.77	Low(0.04±0.02)	High(0.04±0.01)	0.92	Low(0.04±0.01)	High(0.05±0.02)	0.0023	Low(0.08±0.03)	High(0.09±0.02)	0.08	Low(0.08±0.03)	High(0.09±0.02)	0.33
NKT	Low(0.13±0.03)	High(0.11±0.03)	0.91	Low(0.13±0.03)	High(0.11±0.03)	0.07	Low(0.13±0.03)	High(0.11±0.03)	0.00069	Low(0.12±0.03)	High(0.11±0.03)	0.12	Low(0.07±0.03)	High(0.08±0.03)	0.04	Low(0.08±0.03)	High(0.08±0.03)	0.87	Low(0.08±0.03)	High(0.09±0.03)	0.67	Low(0.08±0.03)	High(0.09±0.02)	0.35
nTreg	Low(0.01±5.4e-3)	High(0.02±5.7e-3)	0.003	Low(0.01±5.6e-3)	High(0.02±5.8e-3)	0.0075	Low(0.01±5.0e-3)	High(0.02±5.7e-3)	0.0027	Low(0.01±5.4e-3)	High(0.02±5.4e-3)	0.01	Low(7.5e-4±8.4e-4)	High(1.4e-3±1.2e-3)	4.8e-05	Low(8.1e-4±9.9e-4)	High(1.4e-3±1.1e-3)	0.00021	Low(3.7e-3±2.2e-3)	High(4.8e-3±2.1e-3)	0.19	Low(3.7e-3±2.2e-3)	High(4.9e-3±2.0e-3)	0.05
Tfh	Low(5.7e-3±3.3e-3)	High(0.01±5.0e-3)	0.0013	Low(7.1e-3±4.9e-3)	High(9.2e-3±4.7e-3)	0.11	Low(6.6e-3±3.7e-3)	High(8.9e-3±5.0e-3)	0.0045	Low(7.4e-3±4.6e-3)	High(8.1e-3±4.5e-3)	0.2	Low(4.2e-3±3.3e-3)	High(6.0e-3±3.0e-3)	0.00016	Low(4.3e-3±3.3e-3)	High(5.9e-3±3.1e-3)	0.00074	Low(5.1e-3±3.3e-3)	High(7.4e-3±4.4e-3)	0.06	Low(6.5e-3±4.9e-3)	High(6.1e-3±3.1e-3)	0.66
Th1	Low(2.8e-3±1.6e-3)	High(2.9e-3±1.7e-3)	0.00089	Low(2.7e-3±1.9e-3)	High(2.9e-3±1.4e-3)	0.37	Low(3.7e-3±1.7e-3)	High(3.3e-3±1.4e-3)	0.18	Low(3.5e-3±1.7e-3)	High(3.5e-3±1.4e-3)	0.52	Low(3.1e-3±1.9e-3)	High(3.6e-3±1.8e-3)	0.11	Low(2.8e-3±1.8e-3)	High(3.8e-3±1.8e-3)	0.0021	Low(4.0e-3±2.3e-3)	High(4.5e-3±3.0e-3)	0.64	Low(4.2e-3±2.8e-3)	High(4.3e-3±2.6e-3)	0.78
Th17	Low(5.3e-3±3.0e-3)	High(4.4e-3±1.8e-3)	0.85	Low(4.8e-3±2.9e-3)	High(5.0e-3±2.0e-3)	0.79	Low(4.9e-3±2.1e-3)	High(4.4e-3±1.9e-3)	0.18	Low(4.4e-3±2.2e-3)	High(5.0e-3±1.8e-3)	0.03	Low(4.7e-3±2.7e-3)	High(4.9e-3±2.1e-3)	0.59	Low(4.7e-3±2.5e-3)	High(4.9e-3±2.4e-3)	0.65	Low(5.7e-3±3.5e-3)	High(7.2e-3±3.3e-3)	0.15	Low(5.8e-3±4.0e-3)	High(7.1e-3±2.8e-3)	0.09
Th2	Low(7.4e-3±3.0e-3)	High(7.4e-3±3.1e-3)	0.23	Low(7.3e-3±2.6e-3)	High(7.5e-3±3.5e-3)	0.91	Low(6.1e-3±3.3e-3)	High(6.7e-3±3.2e-3)	0.34	Low(6.8e-3±3.2e-3)	High(6.1e-3±3.2e-3)	0.2	Low(3.2e-3±2.0e-3)	High(4.4e-3±1.6e-3)	4.5e-05	Low(3.6e-3±2.0e-3)	High(4.0e-3±1.8e-3)	0.28	Low(4.3e-3±2.3e-3)	High(5.6e-3±2.4e-3)	0.12	Low(5.5e-3±2.8e-3)	High(4.5e-3±1.9e-3)	0.2
Tr1	Low(9.1e-3±4.9e-3)	High(0.02±6.5e-3)	0.77	Low(0.01±5.8e-3)	High(0.02±6.6e-3)	0.0032	Low(0.01±4.2e-3)	High(0.02±6.1e-3)	5.2e-06	Low(0.01±5.3e-3)	High(0.01±5.6e-3)	0.00058	Low(2.3e-4±5.1e-4)	High(1.4e-4±3.8e-4)	0.19	Low(1.6e-4±3.7e-4)	High(2.1e-4±5.2e-4)	0.89	Low(4.0e-3±2.3e-3)	High(5.7e-3±2.5e-3)	0.05	Low(4.2e-3±2.8e-3)	High(5.4e-3±2.1e-3)	0.05
