# Supplementary material for: Comprehensive analysis reveals key genes and environmental toxin exposures underlying treatment response in ulcerative colitis based on in-silico analysis and Mendelian randomization
Source: Aging (Albany NY). 2023 Dec 4;15(23):14141–71. doi: 10.18632/aging.205294 (PMC10756092; doi:10.18632/aging.205294)
Supplement: Supplementary Table 4 [file aging-15-205294-s005.xls]

## Sheet: Supplementary Table 4
Supplementary Table 4. Proteins that interact with DAPP1 and ELL2, along with the types of interactions, were obtained through the GeneMANIA database.
DAPP1
Gene 1	Gene 2	Weight	Network	Reference
CD79B	CD79A	0.0152502	Co-expression	Wang-Maris-2006
BLNK	CD79A	0.011094	Co-expression	Wang-Maris-2006
BLNK	CD79B	0.0101239	Co-expression	Wang-Maris-2006
PLCG2	BLNK	0.0151278	Co-expression	Wang-Maris-2006
BTK	BLNK	0.0104326	Co-expression	Wang-Maris-2006
VAV2	CD19	0.0072741	Co-expression	Wang-Maris-2006
PIK3CD	MAP4K1	0.00750196	Co-expression	Wang-Maris-2006
RASGRP1	CD79A	0.0135971	Co-expression	Wang-Maris-2006
RASGRP1	CD79B	0.0114026	Co-expression	Wang-Maris-2006
RASGRP1	BLNK	0.00904087	Co-expression	Wang-Maris-2006
BLNK	DAPP1	0.0191082	Co-expression	Mallon-McKay-2013
CD19	CD79B	0.00942562	Co-expression	Mallon-McKay-2013
PIK3CD	MAP4K1	0.0167344	Co-expression	Mallon-McKay-2013
CD79A	DAPP1	0.00980004	Co-expression	Roth-Zlotnik-2006
CD79B	CD79A	0.00977195	Co-expression	Roth-Zlotnik-2006
BLNK	DAPP1	0.0236968	Co-expression	Roth-Zlotnik-2006
BLNK	CD79A	0.00799496	Co-expression	Roth-Zlotnik-2006
MAP4K1	DAPP1	0.00618779	Co-expression	Roth-Zlotnik-2006
MAP4K1	CD79A	0.00320717	Co-expression	Roth-Zlotnik-2006
MAP4K1	CD79B	0.00608126	Co-expression	Roth-Zlotnik-2006
MAP4K1	BLNK	0.00487591	Co-expression	Roth-Zlotnik-2006
MAP4K1	PLCG2	0.00702786	Co-expression	Roth-Zlotnik-2006
BTK	PLCG2	0.0100138	Co-expression	Roth-Zlotnik-2006
BTK	PIK3AP1	0.00854418	Co-expression	Roth-Zlotnik-2006
BTK	MAP4K1	0.0024652	Co-expression	Roth-Zlotnik-2006
CD19	CD79A	0.00528496	Co-expression	Roth-Zlotnik-2006
CD19	CD79B	0.00964994	Co-expression	Roth-Zlotnik-2006
CD19	BLNK	0.0084267	Co-expression	Roth-Zlotnik-2006
CD19	PLCG2	0.0111124	Co-expression	Roth-Zlotnik-2006
CD19	MAP4K1	0.00315619	Co-expression	Roth-Zlotnik-2006
CD19	BTK	0.00410708	Co-expression	Roth-Zlotnik-2006
PIK3CD	MAP4K1	0.00666761	Co-expression	Roth-Zlotnik-2006
PIK3CD	BTK	0.010393	Co-expression	Roth-Zlotnik-2006
CD79B	CD79A	0.0151451	Co-expression	Ramaswamy-Golub-2001
PLCG2	CD79A	0.0110923	Co-expression	Ramaswamy-Golub-2001
CD19	CD79A	0.0163029	Co-expression	Ramaswamy-Golub-2001
CD19	CD79B	0.0186315	Co-expression	Ramaswamy-Golub-2001
CD19	MAP4K1	0.0132664	Co-expression	Ramaswamy-Golub-2001
BTK	DAPP1	0.00685903	Co-expression	Innocenti-Brown-2011
BTK	MAP4K1	0.0098732	Co-expression	Innocenti-Brown-2011
PIK3CD	DAPP1	0.0138133	Co-expression	Innocenti-Brown-2011
PIK3CD	BTK	0.0124245	Co-expression	Innocenti-Brown-2011
RASGRP1	CD19	0.0166087	Co-expression	Innocenti-Brown-2011
CD79B	CD79A	0.013796	Co-expression	Alizadeh-Staudt-2000
BLNK	CD79A	0.0129023	Co-expression	Alizadeh-Staudt-2000
BLNK	CD79B	0.0128623	Co-expression	Alizadeh-Staudt-2000
PLCG2	CD79A	0.0104231	Co-expression	Alizadeh-Staudt-2000
PLCG2	CD79B	0.0118461	Co-expression	Alizadeh-Staudt-2000
PLCG2	BLNK	0.0121995	Co-expression	Alizadeh-Staudt-2000
MAP4K1	CD79B	0.0108987	Co-expression	Alizadeh-Staudt-2000
MAP4K1	PLCG2	0.015545	Co-expression	Alizadeh-Staudt-2000
ERBB3	PLCG2	0.0130513	Co-expression	Alizadeh-Staudt-2000
CD19	CD79A	0.0108725	Co-expression	Alizadeh-Staudt-2000
CD19	CD79B	0.0102793	Co-expression	Alizadeh-Staudt-2000
CD19	BLNK	0.00855229	Co-expression	Alizadeh-Staudt-2000
CD19	PLCG2	0.00874852	Co-expression	Alizadeh-Staudt-2000
CD19	MAP4K1	0.00985547	Co-expression	Alizadeh-Staudt-2000
MAP4K1	CD79B	0.0114553	Co-expression	Dobbin-Giordano-2005
BTK	CD79A	0.00513312	Co-expression	Dobbin-Giordano-2005
BTK	CD79B	0.00547644	Co-expression	Dobbin-Giordano-2005
BTK	BLNK	0.00462592	Co-expression	Dobbin-Giordano-2005
BTK	MAP4K1	0.00482216	Co-expression	Dobbin-Giordano-2005
RASGRP3	BLNK	0.00755702	Co-expression	Dobbin-Giordano-2005
RASGRP3	MAP4K1	0.00781388	Co-expression	Dobbin-Giordano-2005
RASGRP3	BTK	0.00425515	Co-expression	Dobbin-Giordano-2005
CD19	CD79A	0.00538657	Co-expression	Dobbin-Giordano-2005
CD19	CD79B	0.00622377	Co-expression	Dobbin-Giordano-2005
CD19	BLNK	0.0050157	Co-expression	Dobbin-Giordano-2005
CD19	MAP4K1	0.00489871	Co-expression	Dobbin-Giordano-2005
CD19	BTK	0.00276364	Co-expression	Dobbin-Giordano-2005
CD19	RASGRP3	0.00432026	Co-expression	Dobbin-Giordano-2005
PIK3CD	MAP4K1	0.0137332	Co-expression	Dobbin-Giordano-2005
PIK3CD	BTK	0.00701197	Co-expression	Dobbin-Giordano-2005
PIK3CD	RASGRP3	0.0113499	Co-expression	Dobbin-Giordano-2005
RASGRP1	CD79A	0.00669363	Co-expression	Dobbin-Giordano-2005
RASGRP1	CD79B	0.00729765	Co-expression	Dobbin-Giordano-2005
RASGRP1	BLNK	0.00620403	Co-expression	Dobbin-Giordano-2005
RASGRP1	MAP4K1	0.00602697	Co-expression	Dobbin-Giordano-2005
RASGRP1	BTK	0.00351446	Co-expression	Dobbin-Giordano-2005
RASGRP1	RASGRP3	0.0056421	Co-expression	Dobbin-Giordano-2005
RASGRP1	CD19	0.00363299	Co-expression	Dobbin-Giordano-2005
CD79B	CD79A	0.0140037	Co-expression	Rieger-Chu-2004
MAP4K1	PLCG2	0.00901711	Co-expression	Rieger-Chu-2004
BTK	PLCG2	0.00986588	Co-expression	Rieger-Chu-2004
BTK	MAP4K1	0.00932559	Co-expression	Rieger-Chu-2004
CD79B	CD79A	0.00520834	Co-expression	Bild-Nevins-2006 B
BLNK	CD79A	0.00770866	Co-expression	Bild-Nevins-2006 B
PLCG2	CD79A	0.00691822	Co-expression	Bild-Nevins-2006 B
PLCG2	CD79B	0.00744882	Co-expression	Bild-Nevins-2006 B
MAP4K1	CD79A	0.0039204	Co-expression	Bild-Nevins-2006 B
MAP4K1	CD79B	0.00472174	Co-expression	Bild-Nevins-2006 B
MAP4K1	PLCG2	0.00555253	Co-expression	Bild-Nevins-2006 B
BTK	CD79A	0.00725577	Co-expression	Bild-Nevins-2006 B
BTK	CD79B	0.00745599	Co-expression	Bild-Nevins-2006 B
BTK	BLNK	0.017513	Co-expression	Bild-Nevins-2006 B
BTK	MAP4K1	0.00615889	Co-expression	Bild-Nevins-2006 B
RASGRP3	CD79A	0.00920413	Co-expression	Bild-Nevins-2006 B
RASGRP3	CD79B	0.00968443	Co-expression	Bild-Nevins-2006 B
RASGRP3	PLCG2	0.0168688	Co-expression	Bild-Nevins-2006 B
CD19	CD79A	0.00501231	Co-expression	Bild-Nevins-2006 B
CD19	CD79B	0.00586152	Co-expression	Bild-Nevins-2006 B
CD19	BLNK	0.00864193	Co-expression	Bild-Nevins-2006 B
CD19	PLCG2	0.00716301	Co-expression	Bild-Nevins-2006 B
CD19	MAP4K1	0.00448911	Co-expression	Bild-Nevins-2006 B
CD19	BTK	0.00752976	Co-expression	Bild-Nevins-2006 B
CD19	RASGRP3	0.00966199	Co-expression	Bild-Nevins-2006 B
CD79B	CD79A	0.0148642	Co-expression	Burington-Shaughnessy-2008
PLCG2	CD79A	0.0113428	Co-expression	Burington-Shaughnessy-2008
PLCG2	CD79B	0.00845084	Co-expression	Burington-Shaughnessy-2008
RASGRP3	BLNK	0.0143044	Co-expression	Burington-Shaughnessy-2008
RASGRP1	RASGRP3	0.0148056	Co-expression	Burington-Shaughnessy-2008
CD79B	CD79A	0.00371093	Co-expression	Boldrick-Relman-2002
MAP4K1	CD79A	0.0055377	Co-expression	Boldrick-Relman-2002
MAP4K1	CD79B	0.00760653	Co-expression	Boldrick-Relman-2002
CBLB	PPP3CC	0.0112012	Co-expression	Boldrick-Relman-2002
CBLB	CD79A	0.00558673	Co-expression	Boldrick-Relman-2002
ERBB3	PPP3CA	0.00794739	Co-expression	Boldrick-Relman-2002
CD19	PPP3CC	0.00657448	Co-expression	Boldrick-Relman-2002
CD19	CD79A	0.00376174	Co-expression	Boldrick-Relman-2002
CD19	CD79B	0.00450749	Co-expression	Boldrick-Relman-2002
PLCG2	CD79A	0.00798477	Co-expression	Arijs-Rutgeerts-2009
PIK3AP1	DAPP1	0.0238246	Co-expression	Arijs-Rutgeerts-2009
MAP4K1	CD79A	0.00371171	Co-expression	Arijs-Rutgeerts-2009
BTK	CD79A	0.00169376	Co-expression	Arijs-Rutgeerts-2009
BTK	PLCG2	0.00703985	Co-expression	Arijs-Rutgeerts-2009
BTK	MAP4K1	0.00292661	Co-expression	Arijs-Rutgeerts-2009
CD19	CD79A	0.00173905	Co-expression	Arijs-Rutgeerts-2009
CD19	CD79B	0.00500464	Co-expression	Arijs-Rutgeerts-2009
CD19	PLCG2	0.00682844	Co-expression	Arijs-Rutgeerts-2009
CD19	MAP4K1	0.00317828	Co-expression	Arijs-Rutgeerts-2009
CD19	BTK	0.00147469	Co-expression	Arijs-Rutgeerts-2009
PIK3CD	MAP4K1	0.015258	Co-expression	Arijs-Rutgeerts-2009
PIK3CD	BTK	0.00630474	Co-expression	Arijs-Rutgeerts-2009
PIK3CD	CD19	0.0063952	Co-expression	Arijs-Rutgeerts-2009
RASGRP1	PLCG2	0.00713875	Co-expression	Arijs-Rutgeerts-2009
RASGRP1	MAP4K1	0.00297788	Co-expression	Arijs-Rutgeerts-2009
RASGRP1	BTK	0.00144894	Co-expression	Arijs-Rutgeerts-2009
RASGRP1	PIK3CD	0.00740575	Co-expression	Arijs-Rutgeerts-2009
ERBB3	CBLB	0.0123594	Co-expression	Jiang-de Kok-2017
PLCG1	VAV2	0.0125807	Co-expression	Jiang-de Kok-2017
CD79B	CD79A	0.0212859	Co-expression	Perou-Botstein-2000
MAP4K1	CD79A	0.0129654	Co-expression	Perou-Botstein-2000
CD79B	CD79A	0.0204341	Co-expression	Chen-Brown-2002
PPP3CA	CD79B	0.00604879	Co-expression	Wu-Garvey-2007
CD79B	CD79A	0.0134227	Co-expression	Rosenwald-Staudt-2001
BLNK	CD79A	0.0121321	Co-expression	Rosenwald-Staudt-2001
BLNK	CD79B	0.0124822	Co-expression	Rosenwald-Staudt-2001
PLCG2	CD79A	0.00963452	Co-expression	Rosenwald-Staudt-2001
PLCG2	CD79B	0.0119419	Co-expression	Rosenwald-Staudt-2001
PLCG2	BLNK	0.0104167	Co-expression	Rosenwald-Staudt-2001
MAP4K1	CD79A	0.0128349	Co-expression	Rosenwald-Staudt-2001
MAP4K1	CD79B	0.01445	Co-expression	Rosenwald-Staudt-2001
MAP4K1	PLCG2	0.0123059	Co-expression	Rosenwald-Staudt-2001
RASGRP3	CD79A	0.0131504	Co-expression	Rosenwald-Staudt-2001
RASGRP3	CD79B	0.0132446	Co-expression	Rosenwald-Staudt-2001
RASGRP3	BLNK	0.0140444	Co-expression	Rosenwald-Staudt-2001
RASGRP3	PLCG2	0.0143094	Co-expression	Rosenwald-Staudt-2001
RASGRP3	MAP4K1	0.0191142	Co-expression	Rosenwald-Staudt-2001
ERBB3	PLCG2	0.0136646	Co-expression	Rosenwald-Staudt-2001
CD19	CD79A	0.0127718	Co-expression	Rosenwald-Staudt-2001
CD19	CD79B	0.0113753	Co-expression	Rosenwald-Staudt-2001
CD19	BLNK	0.010301	Co-expression	Rosenwald-Staudt-2001
CD19	RASGRP3	0.0109602	Co-expression	Rosenwald-Staudt-2001
PIK3CD	DAPP1	0.0176474	Co-expression	Rosenwald-Staudt-2001
CD79B	CD79A	0.00718619	Co-localization	Johnson-Shoemaker-2003
BLNK	DAPP1	0.0178944	Co-localization	Johnson-Shoemaker-2003
BLNK	CD79A	0.00798316	Co-localization	Johnson-Shoemaker-2003
PLCG2	CD79A	0.00445754	Co-localization	Johnson-Shoemaker-2003
PLCG2	CD79B	0.00514841	Co-localization	Johnson-Shoemaker-2003
MAP4K1	CD79A	0.00981951	Co-localization	Johnson-Shoemaker-2003
MAP4K1	CD79B	0.0110902	Co-localization	Johnson-Shoemaker-2003
MAP4K1	PLCG2	0.00711861	Co-localization	Johnson-Shoemaker-2003
PPP3CB	PPP3CA	0.00481452	Co-localization	Johnson-Shoemaker-2003
BTK	DAPP1	0.0141851	Co-localization	Johnson-Shoemaker-2003
BTK	BLNK	0.0112983	Co-localization	Johnson-Shoemaker-2003
PLCG1	PLCG2	0.218976	Co-localization	Chen-Huang-2014
WDR20	PPP3CA	0.000492239	Genetic Interactions	Lin-Smith-2010
VAV2	PPP3CA	0.000279245	Genetic Interactions	Lin-Smith-2010
VAV2	WDR20	0.000873576	Genetic Interactions	Lin-Smith-2010
PIK3CD	BTK	0.00102985	Genetic Interactions	Lin-Smith-2010
RASGRP1	BLNK	0.000899355	Genetic Interactions	Lin-Smith-2010
RASGRP1	PLCG2	0.0014864	Genetic Interactions	Lin-Smith-2010
RASGRP1	VAV2	0.000570226	Genetic Interactions	Lin-Smith-2010
PPP3CC	DAPP1	0.0964584	Pathway	Wu-Stein-2010
CD79A	DAPP1	0.04949	Pathway	Wu-Stein-2010
CD79B	DAPP1	0.0501008	Pathway	Wu-Stein-2010
CD79B	CD79A	0.0319141	Pathway	Wu-Stein-2010
BLNK	CD79A	0.0320591	Pathway	Wu-Stein-2010
BLNK	CD79B	0.0324548	Pathway	Wu-Stein-2010
PLCG2	CD79A	0.00979188	Pathway	Wu-Stein-2010
PLCG2	CD79B	0.00991273	Pathway	Wu-Stein-2010
PLCG2	BLNK	0.00995777	Pathway	Wu-Stein-2010
MAP4K1	DAPP1	0.0792146	Pathway	Wu-Stein-2010
PPP3CA	DAPP1	0.0658517	Pathway	Wu-Stein-2010
PPP3CA	PPP3CC	0.0817575	Pathway	Wu-Stein-2010
PPP3CA	PLCG2	0.0130291	Pathway	Wu-Stein-2010
PPP3CB	DAPP1	0.0658517	Pathway	Wu-Stein-2010
PPP3CB	PPP3CC	0.0817575	Pathway	Wu-Stein-2010
PPP3CB	PLCG2	0.0130291	Pathway	Wu-Stein-2010
PPP3CB	PPP3CA	0.0558155	Pathway	Wu-Stein-2010
BTK	CD79A	0.0250321	Pathway	Wu-Stein-2010
BTK	CD79B	0.025341	Pathway	Wu-Stein-2010
BTK	BLNK	0.0254561	Pathway	Wu-Stein-2010
BTK	PLCG2	0.00777512	Pathway	Wu-Stein-2010
RASGRP3	PLCG2	0.0075986	Pathway	Wu-Stein-2010
ERBB3	CD79A	0.00773701	Pathway	Wu-Stein-2010
ERBB3	CD79B	0.0078325	Pathway	Wu-Stein-2010
ERBB3	BLNK	0.00786809	Pathway	Wu-Stein-2010
ERBB3	PLCG2	0.00240317	Pathway	Wu-Stein-2010
ERBB3	CBLB	0.00443242	Pathway	Wu-Stein-2010
CD19	CD79A	0.0417053	Pathway	Wu-Stein-2010
CD19	CD79B	0.04222	Pathway	Wu-Stein-2010
CD19	BLNK	0.0424119	Pathway	Wu-Stein-2010
VAV2	DAPP1	0.0306451	Pathway	Wu-Stein-2010
VAV2	PPP3CC	0.0380472	Pathway	Wu-Stein-2010
VAV2	CD79A	0.0195209	Pathway	Wu-Stein-2010
VAV2	CD79B	0.0197618	Pathway	Wu-Stein-2010
VAV2	BLNK	0.0198516	Pathway	Wu-Stein-2010
VAV2	PLCG2	0.00606331	Pathway	Wu-Stein-2010
VAV2	PPP3CA	0.0259746	Pathway	Wu-Stein-2010
VAV2	PPP3CB	0.0259746	Pathway	Wu-Stein-2010
VAV2	CD19	0.0258247	Pathway	Wu-Stein-2010
PIK3CD	PLCG2	0.00379307	Pathway	Wu-Stein-2010
PIK3CD	BTK	0.00969663	Pathway	Wu-Stein-2010
PIK3CD	CBLB	0.00699596	Pathway	Wu-Stein-2010
PIK3CD	ERBB3	0.00299708	Pathway	Wu-Stein-2010
PIK3CD	CD19	0.0161553	Pathway	Wu-Stein-2010
PIK3CD	VAV2	0.00756177	Pathway	Wu-Stein-2010
PLCG1	BLNK	0.0117568	Pathway	Wu-Stein-2010
PLCG1	BTK	0.00917983	Pathway	Wu-Stein-2010
PLCG1	ERBB3	0.00283734	Pathway	Wu-Stein-2010
PLCG1	PIK3CD	0.00447835	Pathway	Wu-Stein-2010
PPP3CC	DAPP1	0.160434	Pathway	NCI_NATURE
CD79A	DAPP1	0.0592848	Pathway	NCI_NATURE
CD79B	DAPP1	0.0592848	Pathway	NCI_NATURE
CD79B	CD79A	0.0391717	Pathway	NCI_NATURE
BLNK	CD79A	0.0602188	Pathway	NCI_NATURE
BLNK	CD79B	0.0602188	Pathway	NCI_NATURE
PLCG2	CD79A	0.0658911	Pathway	NCI_NATURE
PLCG2	CD79B	0.0658911	Pathway	NCI_NATURE
PLCG2	BLNK	0.101294	Pathway	NCI_NATURE
MAP4K1	DAPP1	0.0888922	Pathway	NCI_NATURE
PPP3CA	DAPP1	0.145725	Pathway	NCI_NATURE
PPP3CA	PPP3CC	0.260565	Pathway	NCI_NATURE
PPP3CB	DAPP1	0.118742	Pathway	NCI_NATURE
PPP3CB	PPP3CC	0.212318	Pathway	NCI_NATURE
PPP3CB	PPP3CA	0.192852	Pathway	NCI_NATURE
BTK	CD79A	0.0426799	Pathway	NCI_NATURE
BTK	CD79B	0.0426799	Pathway	NCI_NATURE
BTK	BLNK	0.0656119	Pathway	NCI_NATURE
BTK	PLCG2	0.0717923	Pathway	NCI_NATURE
CD19	CD79A	0.10093	Pathway	NCI_NATURE
CD19	CD79B	0.10093	Pathway	NCI_NATURE
CD19	BLNK	0.155159	Pathway	NCI_NATURE
VAV2	DAPP1	0.0678865	Pathway	NCI_NATURE
VAV2	PPP3CC	0.121385	Pathway	NCI_NATURE
VAV2	CD79A	0.0448552	Pathway	NCI_NATURE
VAV2	CD79B	0.0448552	Pathway	NCI_NATURE
VAV2	BLNK	0.068956	Pathway	NCI_NATURE
VAV2	PPP3CA	0.110256	Pathway	NCI_NATURE
VAV2	PPP3CB	0.0898411	Pathway	NCI_NATURE
PLCG1	BTK	0.0290897	Pathway	NCI_NATURE
VAV2	CBLB	0.141656	Pathway	IMID
CD79A	DAPP1	0.0532474	Physical Interactions	IREF-reactome
CD79B	DAPP1	0.0532474	Physical Interactions	IREF-reactome
CD79B	CD79A	0.0464137	Physical Interactions	IREF-reactome
BLNK	DAPP1	0.0573541	Physical Interactions	IREF-reactome
BLNK	CD79A	0.0499934	Physical Interactions	IREF-reactome
BLNK	CD79B	0.0499934	Physical Interactions	IREF-reactome
PLCG2	DAPP1	0.0198402	Physical Interactions	IREF-reactome
PLCG2	CD79A	0.0172939	Physical Interactions	IREF-reactome
PLCG2	CD79B	0.0172939	Physical Interactions	IREF-reactome
PLCG2	BLNK	0.0186277	Physical Interactions	IREF-reactome
PIK3AP1	DAPP1	0.0718792	Physical Interactions	IREF-reactome
PIK3AP1	CD79A	0.0626544	Physical Interactions	IREF-reactome
PIK3AP1	CD79B	0.0626544	Physical Interactions	IREF-reactome
PIK3AP1	BLNK	0.0674866	Physical Interactions	IREF-reactome
PIK3AP1	PLCG2	0.0233453	Physical Interactions	IREF-reactome
BTK	DAPP1	0.0291022	Physical Interactions	IREF-reactome
BTK	CD79A	0.0253673	Physical Interactions	IREF-reactome
BTK	CD79B	0.0253673	Physical Interactions	IREF-reactome
BTK	BLNK	0.0273238	Physical Interactions	IREF-reactome
BTK	PLCG2	0.00945197	Physical Interactions	IREF-reactome
BTK	PIK3AP1	0.0342436	Physical Interactions	IREF-reactome
RASGRP3	DAPP1	0.0726077	Physical Interactions	IREF-reactome
RASGRP3	CD79A	0.0632893	Physical Interactions	IREF-reactome
RASGRP3	CD79B	0.0632893	Physical Interactions	IREF-reactome
RASGRP3	BLNK	0.0681705	Physical Interactions	IREF-reactome
RASGRP3	PLCG2	0.0235819	Physical Interactions	IREF-reactome
RASGRP3	BTK	0.0345907	Physical Interactions	IREF-reactome
CBLB	DAPP1	0.0610872	Physical Interactions	IREF-reactome
CBLB	CD79A	0.0532474	Physical Interactions	IREF-reactome
CBLB	CD79B	0.0532474	Physical Interactions	IREF-reactome
CBLB	BLNK	0.0573541	Physical Interactions	IREF-reactome
CBLB	PLCG2	0.0198402	Physical Interactions	IREF-reactome
CBLB	PIK3AP1	0.0718792	Physical Interactions	IREF-reactome
CBLB	BTK	0.0291022	Physical Interactions	IREF-reactome
CBLB	RASGRP3	0.0726077	Physical Interactions	IREF-reactome
CD19	DAPP1	0.0584713	Physical Interactions	IREF-reactome
CD19	CD79A	0.0509672	Physical Interactions	IREF-reactome
CD19	CD79B	0.0509672	Physical Interactions	IREF-reactome
CD19	BLNK	0.054898	Physical Interactions	IREF-reactome
CD19	PLCG2	0.0189906	Physical Interactions	IREF-reactome
CD19	PIK3AP1	0.0688012	Physical Interactions	IREF-reactome
CD19	BTK	0.027856	Physical Interactions	IREF-reactome
CD19	CBLB	0.0584713	Physical Interactions	IREF-reactome
VAV2	PLCG2	0.00557371	Physical Interactions	IREF-reactome
VAV2	BTK	0.0081757	Physical Interactions	IREF-reactome
PIK3CD	DAPP1	0.0298559	Physical Interactions	IREF-reactome
PIK3CD	CD79A	0.0260243	Physical Interactions	IREF-reactome
PIK3CD	CD79B	0.0260243	Physical Interactions	IREF-reactome
PIK3CD	BLNK	0.0280314	Physical Interactions	IREF-reactome
PIK3CD	PLCG2	0.00969675	Physical Interactions	IREF-reactome
PIK3CD	PIK3AP1	0.0351304	Physical Interactions	IREF-reactome
PIK3CD	BTK	0.0142235	Physical Interactions	IREF-reactome
PIK3CD	CBLB	0.0298559	Physical Interactions	IREF-reactome
PIK3CD	CD19	0.0285774	Physical Interactions	IREF-reactome
PLCG1	DAPP1	0.0150153	Physical Interactions	IREF-reactome
PLCG1	CD79A	0.0130882	Physical Interactions	IREF-reactome
PLCG1	CD79B	0.0130882	Physical Interactions	IREF-reactome
PLCG1	BLNK	0.0140977	Physical Interactions	IREF-reactome
PLCG1	PLCG2	0.00487673	Physical Interactions	IREF-reactome
PLCG1	PIK3AP1	0.017668	Physical Interactions	IREF-reactome
PLCG1	BTK	0.00715335	Physical Interactions	IREF-reactome
PLCG1	RASGRP3	0.017847	Physical Interactions	IREF-reactome
PLCG1	CBLB	0.0150153	Physical Interactions	IREF-reactome
PLCG1	ERBB3	0.0127971	Physical Interactions	IREF-reactome
PLCG1	CD19	0.0143723	Physical Interactions	IREF-reactome
PLCG1	VAV2	0.00421824	Physical Interactions	IREF-reactome
PLCG1	PIK3CD	0.0073386	Physical Interactions	IREF-reactome
RASGRP1	DAPP1	0.0371577	Physical Interactions	IREF-reactome
RASGRP1	CD79A	0.0323889	Physical Interactions	IREF-reactome
RASGRP1	CD79B	0.0323889	Physical Interactions	IREF-reactome
RASGRP1	BLNK	0.0348869	Physical Interactions	IREF-reactome
RASGRP1	PLCG2	0.0120683	Physical Interactions	IREF-reactome
RASGRP1	BTK	0.0177021	Physical Interactions	IREF-reactome
RASGRP1	CBLB	0.0371577	Physical Interactions	IREF-reactome
RASGRP1	VAV2	0.0104387	Physical Interactions	IREF-reactome
RASGRP1	PLCG1	0.00913339	Physical Interactions	IREF-reactome
CD79A	DAPP1	0.0532474	Physical Interactions	Vastrik-Stein-2007
CD79B	DAPP1	0.0532474	Physical Interactions	Vastrik-Stein-2007
CD79B	CD79A	0.0464137	Physical Interactions	Vastrik-Stein-2007
BLNK	DAPP1	0.0573541	Physical Interactions	Vastrik-Stein-2007
BLNK	CD79A	0.0499934	Physical Interactions	Vastrik-Stein-2007
BLNK	CD79B	0.0499934	Physical Interactions	Vastrik-Stein-2007
PLCG2	DAPP1	0.0198402	Physical Interactions	Vastrik-Stein-2007
PLCG2	CD79A	0.0172939	Physical Interactions	Vastrik-Stein-2007
PLCG2	CD79B	0.0172939	Physical Interactions	Vastrik-Stein-2007
PLCG2	BLNK	0.0186277	Physical Interactions	Vastrik-Stein-2007
PIK3AP1	DAPP1	0.0718792	Physical Interactions	Vastrik-Stein-2007
PIK3AP1	CD79A	0.0626544	Physical Interactions	Vastrik-Stein-2007
PIK3AP1	CD79B	0.0626544	Physical Interactions	Vastrik-Stein-2007
PIK3AP1	BLNK	0.0674866	Physical Interactions	Vastrik-Stein-2007
PIK3AP1	PLCG2	0.0233453	Physical Interactions	Vastrik-Stein-2007
BTK	DAPP1	0.0291022	Physical Interactions	Vastrik-Stein-2007
BTK	CD79A	0.0253673	Physical Interactions	Vastrik-Stein-2007
BTK	CD79B	0.0253673	Physical Interactions	Vastrik-Stein-2007
BTK	BLNK	0.0273238	Physical Interactions	Vastrik-Stein-2007
BTK	PLCG2	0.00945197	Physical Interactions	Vastrik-Stein-2007
BTK	PIK3AP1	0.0342436	Physical Interactions	Vastrik-Stein-2007
RASGRP3	DAPP1	0.0726077	Physical Interactions	Vastrik-Stein-2007
RASGRP3	CD79A	0.0632893	Physical Interactions	Vastrik-Stein-2007
RASGRP3	CD79B	0.0632893	Physical Interactions	Vastrik-Stein-2007
RASGRP3	BLNK	0.0681705	Physical Interactions	Vastrik-Stein-2007
RASGRP3	PLCG2	0.0235819	Physical Interactions	Vastrik-Stein-2007
RASGRP3	BTK	0.0345907	Physical Interactions	Vastrik-Stein-2007
CBLB	DAPP1	0.0610872	Physical Interactions	Vastrik-Stein-2007
CBLB	CD79A	0.0532474	Physical Interactions	Vastrik-Stein-2007
CBLB	CD79B	0.0532474	Physical Interactions	Vastrik-Stein-2007
CBLB	BLNK	0.0573541	Physical Interactions	Vastrik-Stein-2007
CBLB	PLCG2	0.0198402	Physical Interactions	Vastrik-Stein-2007
CBLB	PIK3AP1	0.0718792	Physical Interactions	Vastrik-Stein-2007
CBLB	BTK	0.0291022	Physical Interactions	Vastrik-Stein-2007
CBLB	RASGRP3	0.0726077	Physical Interactions	Vastrik-Stein-2007
CD19	DAPP1	0.0584713	Physical Interactions	Vastrik-Stein-2007
CD19	CD79A	0.0509672	Physical Interactions	Vastrik-Stein-2007
CD19	CD79B	0.0509672	Physical Interactions	Vastrik-Stein-2007
CD19	BLNK	0.054898	Physical Interactions	Vastrik-Stein-2007
CD19	PLCG2	0.0189906	Physical Interactions	Vastrik-Stein-2007
CD19	PIK3AP1	0.0688012	Physical Interactions	Vastrik-Stein-2007
CD19	BTK	0.027856	Physical Interactions	Vastrik-Stein-2007
CD19	CBLB	0.0584713	Physical Interactions	Vastrik-Stein-2007
VAV2	PLCG2	0.00557371	Physical Interactions	Vastrik-Stein-2007
VAV2	BTK	0.0081757	Physical Interactions	Vastrik-Stein-2007
PIK3CD	DAPP1	0.0298559	Physical Interactions	Vastrik-Stein-2007
PIK3CD	CD79A	0.0260243	Physical Interactions	Vastrik-Stein-2007
PIK3CD	CD79B	0.0260243	Physical Interactions	Vastrik-Stein-2007
PIK3CD	BLNK	0.0280314	Physical Interactions	Vastrik-Stein-2007
PIK3CD	PLCG2	0.00969675	Physical Interactions	Vastrik-Stein-2007
PIK3CD	PIK3AP1	0.0351304	Physical Interactions	Vastrik-Stein-2007
PIK3CD	BTK	0.0142235	Physical Interactions	Vastrik-Stein-2007
PIK3CD	CBLB	0.0298559	Physical Interactions	Vastrik-Stein-2007
PIK3CD	CD19	0.0285774	Physical Interactions	Vastrik-Stein-2007
PLCG1	DAPP1	0.0150153	Physical Interactions	Vastrik-Stein-2007
PLCG1	CD79A	0.0130882	Physical Interactions	Vastrik-Stein-2007
PLCG1	CD79B	0.0130882	Physical Interactions	Vastrik-Stein-2007
PLCG1	BLNK	0.0140977	Physical Interactions	Vastrik-Stein-2007
PLCG1	PLCG2	0.00487673	Physical Interactions	Vastrik-Stein-2007
PLCG1	PIK3AP1	0.017668	Physical Interactions	Vastrik-Stein-2007
PLCG1	BTK	0.00715335	Physical Interactions	Vastrik-Stein-2007
PLCG1	RASGRP3	0.017847	Physical Interactions	Vastrik-Stein-2007
PLCG1	CBLB	0.0150153	Physical Interactions	Vastrik-Stein-2007
PLCG1	ERBB3	0.0127971	Physical Interactions	Vastrik-Stein-2007
PLCG1	CD19	0.0143723	Physical Interactions	Vastrik-Stein-2007
PLCG1	VAV2	0.00421824	Physical Interactions	Vastrik-Stein-2007
PLCG1	PIK3CD	0.0073386	Physical Interactions	Vastrik-Stein-2007
RASGRP1	DAPP1	0.0371577	Physical Interactions	Vastrik-Stein-2007
RASGRP1	CD79A	0.0323889	Physical Interactions	Vastrik-Stein-2007
RASGRP1	CD79B	0.0323889	Physical Interactions	Vastrik-Stein-2007
RASGRP1	BLNK	0.0348869	Physical Interactions	Vastrik-Stein-2007
RASGRP1	PLCG2	0.0120683	Physical Interactions	Vastrik-Stein-2007
RASGRP1	BTK	0.0177021	Physical Interactions	Vastrik-Stein-2007
RASGRP1	CBLB	0.0371577	Physical Interactions	Vastrik-Stein-2007
RASGRP1	VAV2	0.0104387	Physical Interactions	Vastrik-Stein-2007
RASGRP1	PLCG1	0.00913339	Physical Interactions	Vastrik-Stein-2007
ERBB3	DAPP1	0.193588	Physical Interactions	Jones-MacBeath-2006
VAV2	ERBB3	0.122748	Physical Interactions	Jones-MacBeath-2006
PLCG1	ERBB3	0.122748	Physical Interactions	Jones-MacBeath-2006
PPP3CB	PPP3CA	0.160531	Physical Interactions	IREF-quickgo
PLCG1	BLNK	0.121204	Physical Interactions	IREF-quickgo
CD79B	CD79A	0.209263	Physical Interactions	BIOGRID-SMALL-SCALE-STUDIES
BLNK	CD79A	0.0599209	Physical Interactions	BIOGRID-SMALL-SCALE-STUDIES
PLCG2	BLNK	0.0329086	Physical Interactions	BIOGRID-SMALL-SCALE-STUDIES
PIK3AP1	PLCG2	0.0794651	Physical Interactions	BIOGRID-SMALL-SCALE-STUDIES
MAP4K1	BLNK	0.0377648	Physical Interactions	BIOGRID-SMALL-SCALE-STUDIES
APBB3	DAPP1	0.541429	Physical Interactions	BIOGRID-SMALL-SCALE-STUDIES
BTK	BLNK	0.0155773	Physical Interactions	BIOGRID-SMALL-SCALE-STUDIES
BTK	PLCG2	0.0207732	Physical Interactions	BIOGRID-SMALL-SCALE-STUDIES
WDR20	DAPP1	0.315621	Physical Interactions	BIOGRID-SMALL-SCALE-STUDIES
CBLB	PLCG2	0.0274052	Physical Interactions	BIOGRID-SMALL-SCALE-STUDIES
CBLB	BTK	0.0129722	Physical Interactions	BIOGRID-SMALL-SCALE-STUDIES
CD19	CD79A	0.106879	Physical Interactions	BIOGRID-SMALL-SCALE-STUDIES
CD19	CD79B	0.153719	Physical Interactions	BIOGRID-SMALL-SCALE-STUDIES
CD19	PLCG2	0.0586981	Physical Interactions	BIOGRID-SMALL-SCALE-STUDIES
VAV2	CBLB	0.0364756	Physical Interactions	BIOGRID-SMALL-SCALE-STUDIES
VAV2	CD19	0.0781257	Physical Interactions	BIOGRID-SMALL-SCALE-STUDIES
PLCG1	BLNK	0.0117966	Physical Interactions	BIOGRID-SMALL-SCALE-STUDIES
PLCG1	MAP4K1	0.0386897	Physical Interactions	Wu-Li-2007
PPP3CB	PPP3CC	0.0583145	Physical Interactions	Huttlin-Harper-2017
BTK	BLNK	0.303513	Physical Interactions	IREF-mint
ERBB3	DAPP1	0.196085	Physical Interactions	IREF-mint
ERBB3	PPP3CA	0.024136	Physical Interactions	IREF-mint
VAV2	ERBB3	0.038642	Physical Interactions	IREF-mint
PLCG1	ERBB3	0.00950313	Physical Interactions	IREF-mint
APBB3	DAPP1	0.166428	Physical Interactions	Grossmann-Stelzl-2015
WDR20	DAPP1	0.361989	Physical Interactions	Grossmann-Stelzl-2015
PPP3CB	PPP3CC	0.108986	Physical Interactions	Huttlin-Gygi-2015
CBLB	PLCG2	0.321198	Physical Interactions	Rual-Vidal-2005
ERBB3	DAPP1	0.111365	Physical Interactions	IREF-matrixdb
VAV2	ERBB3	0.0324329	Physical Interactions	IREF-matrixdb
PLCG1	ERBB3	0.0182655	Physical Interactions	IREF-matrixdb
CD79B	CD79A	0.295895	Physical Interactions	IREF-spike
MAP4K1	DAPP1	0.422666	Physical Interactions	IREF-spike
BTK	PLCG2	0.046306	Physical Interactions	IREF-spike
BTK	PIK3AP1	0.169636	Physical Interactions	IREF-spike
CBLB	PLCG2	0.0676512	Physical Interactions	IREF-spike
ERBB3	DAPP1	0.140166	Physical Interactions	IREF-spike
VAV2	ERBB3	0.0977664	Physical Interactions	IREF-spike
BLNK	CD79A	0.0457054	Physical Interactions	IREF-biogrid
PLCG2	BLNK	0.0438685	Physical Interactions	IREF-biogrid
PIK3AP1	PLCG2	0.0526414	Physical Interactions	IREF-biogrid
APBB3	DAPP1	0.071235	Physical Interactions	IREF-biogrid
BTK	BLNK	0.0356119	Physical Interactions	IREF-biogrid
BTK	PLCG2	0.0216516	Physical Interactions	IREF-biogrid
ERBB3	DAPP1	0.015052	Physical Interactions	IREF-biogrid
PPP3CB	PPP3CA	0.127682	Predicted	I2D-BioGRID-Yeast2Human
PLCG2	DAPP1	0.315297	Predicted	Wu-Stein-2010
BTK	DAPP1	0.136	Predicted	Wu-Stein-2010
CD19	BTK	0.0596857	Predicted	Wu-Stein-2010
PLCG1	DAPP1	0.100452	Predicted	Wu-Stein-2010
PLCG1	PLCG2	0.034831	Predicted	Wu-Stein-2010
PPP3CB	PPP3CA	0.237603	Predicted	I2D-vonMering-Bork-2002-Low-Yeast2Human
MAP4K1	BLNK	0.305901	Predicted	I2D-IntAct-Mouse2Human
BTK	BLNK	0.044599	Predicted	I2D-IntAct-Mouse2Human
PLCG2	BLNK	0.418727	Predicted	I2D-INNATEDB-Mouse2Human
BTK	PLCG2	0.110022	Predicted	I2D-INNATEDB-Mouse2Human
CD19	BTK	0.193648	Predicted	I2D-INNATEDB-Mouse2Human
CD79B	CD79A	0.782501	Predicted	I2D-BioGRID-Mouse2Human
MAP4K1	BLNK	0.25259	Predicted	I2D-BioGRID-Mouse2Human
BTK	BLNK	0.183131	Predicted	I2D-BioGRID-Mouse2Human
PPP3CB	PPP3CA	0.5	Predicted	I2D-Yu-Vidal-2008-GoldStd-Yeast2Human
PLCG1	PIK3CD	0.332531	Predicted	I2D-BioGRID-Fly2Human
CD79B	CD79A	0.0297848	Shared protein domains	INTERPRO
BLNK	DAPP1	0.0160561	Shared protein domains	INTERPRO
PLCG2	DAPP1	0.0114328	Shared protein domains	INTERPRO
PPP3CA	PPP3CC	0.054058	Shared protein domains	INTERPRO
PPP3CB	PPP3CC	0.054058	Shared protein domains	INTERPRO
PPP3CB	PPP3CA	0.054058	Shared protein domains	INTERPRO
BTK	DAPP1	0.0100974	Shared protein domains	INTERPRO
BTK	PLCG2	0.00881624	Shared protein domains	INTERPRO
CBLB	PLCG2	0.00750433	Shared protein domains	INTERPRO
VAV2	DAPP1	0.0107581	Shared protein domains	INTERPRO
VAV2	PLCG2	0.00938189	Shared protein domains	INTERPRO
VAV2	BTK	0.00829562	Shared protein domains	INTERPRO
PLCG1	DAPP1	0.0109268	Shared protein domains	INTERPRO
PLCG1	PLCG2	0.0368299	Shared protein domains	INTERPRO
PLCG1	BTK	0.00842994	Shared protein domains	INTERPRO
PLCG1	CBLB	0.00716662	Shared protein domains	INTERPRO
PLCG1	VAV2	0.00897083	Shared protein domains	INTERPRO
RASGRP1	RASGRP3	0.0475164	Shared protein domains	INTERPRO
BLNK	DAPP1	0.0149636	Shared protein domains	PFAM
PLCG2	DAPP1	0.0162555	Shared protein domains	PFAM
PPP3CA	PPP3CC	0.0388679	Shared protein domains	PFAM
PPP3CB	PPP3CC	0.0388679	Shared protein domains	PFAM
PPP3CB	PPP3CA	0.0388679	Shared protein domains	PFAM
BTK	DAPP1	0.0165924	Shared protein domains	PFAM
BTK	PLCG2	0.0112796	Shared protein domains	PFAM
VAV2	DAPP1	0.0133296	Shared protein domains	PFAM
VAV2	PLCG2	0.00906149	Shared protein domains	PFAM
VAV2	BTK	0.00924888	Shared protein domains	PFAM
PLCG1	PLCG2	0.0354702	Shared protein domains	PFAM
PLCG1	BTK	0.0101918	Shared protein domains	PFAM
PLCG1	VAV2	0.00818761	Shared protein domains	PFAM
RASGRP1	RASGRP3	0.0319016	Shared protein domains	PFAM
ELL2
Gene 1	Gene 2	Weight	Network	Reference
UAP1	NAMPT	0.0133741	Co-expression	Wang-Maris-2006
DUSP10	ELL2	0.0256367	Co-expression	Mallon-McKay-2013
NAMPT	ELL2	0.0271229	Co-expression	Mallon-McKay-2013
RAB30	ELL2	0.0243243	Co-expression	Mallon-McKay-2013
UAP1	DUSP10	0.0168536	Co-expression	Mallon-McKay-2013
OCLN	MARVELD2	0.0177714	Co-expression	Roth-Zlotnik-2006
UAP1	EFR3A	0.0138027	Co-expression	Ramaswamy-Golub-2001
ELL	AFF4	0.0192889	Co-expression	Innocenti-Brown-2011
PPP2R5C	ELL3	0.0231903	Co-expression	Innocenti-Brown-2011
NAMPT	ELL2	0.010019	Co-expression	Innocenti-Brown-2011
RAB30	AFF4	0.0214157	Co-expression	Innocenti-Brown-2011
UAP1	ELL2	0.0169342	Co-expression	Innocenti-Brown-2011
TIA1	PPP2R5C	0.0145714	Co-expression	Alizadeh-Staudt-2000
CDK9	OCEL1	0.0194217	Co-expression	Dobbin-Giordano-2005
DUSP10	ELL2	0.0272933	Co-expression	Dobbin-Giordano-2005
EFR3A	MLLT3	0.00917528	Co-expression	Rieger-Chu-2004
DUSP10	EFR3A	0.00999924	Co-expression	Rieger-Chu-2004
AFF1	TIA1	0.00906589	Co-expression	Rieger-Chu-2004
UAP1	ELL2	0.00739059	Co-expression	Rieger-Chu-2004
SLC4A2	NBEAL2	0.0139559	Co-expression	Bild-Nevins-2006 B
NAMPT	DUSP10	0.0163016	Co-expression	Bild-Nevins-2006 B
RAB30	ELL2	0.0224861	Co-expression	Bild-Nevins-2006 B
UAP1	DUSP10	0.01762	Co-expression	Bild-Nevins-2006 B
ELL	ELL2	0.0136477	Co-expression	Burington-Shaughnessy-2008
TIA1	PPP2R5C	0.0110589	Co-expression	Boldrick-Relman-2002
RAB30	OCEL1	0.00849973	Co-expression	Boldrick-Relman-2002
AFF1	OCLN	0.0176348	Co-expression	Arijs-Rutgeerts-2009
AFF4	ELL3	0.0177071	Co-expression	Perou-Botstein-2000
EFR3A	EAF2	0.00534354	Co-expression	Wang-Cheung-2015
UAP1	AFF4	0.00421546	Co-expression	Wang-Cheung-2015
TIA1	EFR3A	0.00654054	Co-expression	Wu-Garvey-2007
CDK9	EAF1	0.016701	Co-expression	Rosenwald-Staudt-2001
TIA1	PPP2R5C	0.01774	Co-expression	Rosenwald-Staudt-2001
AFF4	ELL2	0.0131268	Co-expression	Ross-Perou-2001
EFR3A	PPP2R5C	0.0140946	Co-expression	Perou-Botstein-1999
NAMPT	ELL2	0.00688493	Co-localization	Johnson-Shoemaker-2003
NAMPT	ELL	0.0103447	Co-localization	Johnson-Shoemaker-2003
UAP1	ELL2	0.0137697	Co-localization	Johnson-Shoemaker-2003
UAP1	NAMPT	0.0106645	Co-localization	Johnson-Shoemaker-2003
PPP2R5C	AFF4	0.000642529	Genetic Interactions	Lin-Smith-2010
EFR3A	EAF1	0.000756337	Genetic Interactions	Lin-Smith-2010
EFR3A	ELL	0.000739886	Genetic Interactions	Lin-Smith-2010
DUSP10	ELL3	0.000869183	Genetic Interactions	Lin-Smith-2010
DUSP10	ELL	0.00094875	Genetic Interactions	Lin-Smith-2010
DUSP10	PPP2R5C	0.000486636	Genetic Interactions	Lin-Smith-2010
SLC4A2	DUSP10	0.00145731	Genetic Interactions	Lin-Smith-2010
TIA1	PPP2R5C	0.000752751	Genetic Interactions	Lin-Smith-2010
AFF1	EAF1	0.000447503	Genetic Interactions	Lin-Smith-2010
AFF1	AFF4	0.000469782	Genetic Interactions	Lin-Smith-2010
AFF1	MLLT3	0.000332059	Genetic Interactions	Lin-Smith-2010
AFF1	CDK9	0.000516152	Genetic Interactions	Lin-Smith-2010
AFF1	PPP2R5C	0.000224542	Genetic Interactions	Lin-Smith-2010
AFF1	DUSP10	0.000355802	Genetic Interactions	Lin-Smith-2010
AFF1	SLC4A2	0.000672428	Genetic Interactions	Lin-Smith-2010
UAP1	AFF1	0.00045592	Genetic Interactions	Lin-Smith-2010
CDK9	ELL	0.0368424	Pathway	Wu-Stein-2010
CDK9	ELL	0.0390253	Pathway	REACTOME
CDK9	ELL	0.0328532	Physical Interactions	IREF-reactome
CDK9	ELL	0.0328532	Physical Interactions	Vastrik-Stein-2007
AFF4	ELL2	0.135765	Physical Interactions	Hein-Mann-2015
MLLT3	ELL2	0.179753	Physical Interactions	Hein-Mann-2015
NBEAL2	ELL2	0.187087	Physical Interactions	Hein-Mann-2015
PPP2R5C	ELL2	0.133842	Physical Interactions	Hein-Mann-2015
EFR3A	ELL2	0.121356	Physical Interactions	Hein-Mann-2015
SLC4A2	ELL2	0.104892	Physical Interactions	Hein-Mann-2015
TIA1	ELL2	0.0989297	Physical Interactions	Hein-Mann-2015
AFF1	ELL2	0.0399876	Physical Interactions	Hein-Mann-2015
AFF1	AFF4	0.0929806	Physical Interactions	Hein-Mann-2015
AFF1	ELL	0.0613298	Physical Interactions	Hein-Mann-2015
AFF1	MLLT3	0.123106	Physical Interactions	Hein-Mann-2015
AFF1	CDK9	0.092976	Physical Interactions	Hein-Mann-2015
AFF1	MLLT3	0.61498	Physical Interactions	IREF-dip
CDK9	AFF4	0.17956	Physical Interactions	Jeronimo-Coulombe-2007
CDK9	ELL2	0.13397	Physical Interactions	Rosenbluh-Hahn-2016
CDK9	AFF4	0.063304	Physical Interactions	Rosenbluh-Hahn-2016
CDK9	MLLT3	0.13397	Physical Interactions	Rosenbluh-Hahn-2016
AFF1	CDK9	0.063304	Physical Interactions	Rosenbluh-Hahn-2016
EAF1	ELL2	0.171725	Physical Interactions	BIOGRID-SMALL-SCALE-STUDIES
AFF4	ELL2	0.174381	Physical Interactions	BIOGRID-SMALL-SCALE-STUDIES
ELL	EAF1	0.0716531	Physical Interactions	BIOGRID-SMALL-SCALE-STUDIES
MLLT3	ELL2	0.0640207	Physical Interactions	BIOGRID-SMALL-SCALE-STUDIES
MLLT3	EAF1	0.0642917	Physical Interactions	BIOGRID-SMALL-SCALE-STUDIES
MLLT3	ELL3	0.223382	Physical Interactions	BIOGRID-SMALL-SCALE-STUDIES
MLLT3	AFF4	0.0652859	Physical Interactions	BIOGRID-SMALL-SCALE-STUDIES
MLLT3	ELL	0.0267129	Physical Interactions	BIOGRID-SMALL-SCALE-STUDIES
CDK9	ELL2	0.0326624	Physical Interactions	BIOGRID-SMALL-SCALE-STUDIES
CDK9	AFF4	0.0333078	Physical Interactions	BIOGRID-SMALL-SCALE-STUDIES
CDK9	MLLT3	0.0122284	Physical Interactions	BIOGRID-SMALL-SCALE-STUDIES
EAF2	ELL2	0.202741	Physical Interactions	BIOGRID-SMALL-SCALE-STUDIES
EAF2	ELL	0.0845943	Physical Interactions	BIOGRID-SMALL-SCALE-STUDIES
AFF1	ELL2	0.0775158	Physical Interactions	BIOGRID-SMALL-SCALE-STUDIES
AFF1	AFF4	0.0790476	Physical Interactions	BIOGRID-SMALL-SCALE-STUDIES
AFF1	MLLT3	0.0290209	Physical Interactions	BIOGRID-SMALL-SCALE-STUDIES
AFF1	CDK9	0.014806	Physical Interactions	BIOGRID-SMALL-SCALE-STUDIES
EAF1	ELL2	0.115727	Physical Interactions	Huttlin-Harper-2017
ELL3	EAF1	0.0259585	Physical Interactions	Huttlin-Harper-2017
AFF4	ELL2	0.234731	Physical Interactions	Huttlin-Harper-2017
AFF4	EAF1	0.0231866	Physical Interactions	Huttlin-Harper-2017
AFF4	ELL3	0.0526519	Physical Interactions	Huttlin-Harper-2017
ELL	EAF1	0.0583992	Physical Interactions	Huttlin-Harper-2017
ELL	ELL3	0.132612	Physical Interactions	Huttlin-Harper-2017
ELL	AFF4	0.118452	Physical Interactions	Huttlin-Harper-2017
MLLT3	EAF1	0.0283132	Physical Interactions	Huttlin-Harper-2017
MLLT3	ELL3	0.0642931	Physical Interactions	Huttlin-Harper-2017
CDK9	AFF4	0.0469366	Physical Interactions	Huttlin-Harper-2017
CDK9	MLLT3	0.0573142	Physical Interactions	Huttlin-Harper-2017
EAF2	EAF1	0.0867185	Physical Interactions	Huttlin-Harper-2017
EAF2	ELL3	0.196919	Physical Interactions	Huttlin-Harper-2017
EAF2	AFF4	0.175892	Physical Interactions	Huttlin-Harper-2017
AFF1	EAF1	0.0749305	Physical Interactions	Huttlin-Harper-2017
AFF1	ELL3	0.170151	Physical Interactions	Huttlin-Harper-2017
AFF1	CDK9	0.151682	Physical Interactions	Huttlin-Harper-2017
CDK9	AFF4	0.236533	Physical Interactions	Varjosalo-Superti-Furga-2013
CDK9	MLLT3	0.236533	Physical Interactions	Varjosalo-Superti-Furga-2013
AFF1	CDK9	0.236533	Physical Interactions	Varjosalo-Superti-Furga-2013
EAF1	ELL2	0.105332	Physical Interactions	Huttlin-Gygi-2015
ELL3	EAF1	0.018634	Physical Interactions	Huttlin-Gygi-2015
AFF4	ELL2	0.337506	Physical Interactions	Huttlin-Gygi-2015
AFF4	EAF1	0.0221802	Physical Interactions	Huttlin-Gygi-2015
AFF4	ELL3	0.0597074	Physical Interactions	Huttlin-Gygi-2015
ELL	EAF1	0.0534342	Physical Interactions	Huttlin-Gygi-2015
ELL	ELL3	0.143841	Physical Interactions	Huttlin-Gygi-2015
ELL	AFF4	0.171215	Physical Interactions	Huttlin-Gygi-2015
MLLT3	EAF1	0.0414532	Physical Interactions	Huttlin-Gygi-2015
MLLT3	ELL3	0.111589	Physical Interactions	Huttlin-Gygi-2015
CDK9	AFF4	0.0455357	Physical Interactions	Huttlin-Gygi-2015
CDK9	MLLT3	0.0851032	Physical Interactions	Huttlin-Gygi-2015
EAF2	EAF1	0.0745797	Physical Interactions	Huttlin-Gygi-2015
EAF2	ELL3	0.200763	Physical Interactions	Huttlin-Gygi-2015
EAF2	AFF4	0.238969	Physical Interactions	Huttlin-Gygi-2015
AFF1	EAF1	0.0774908	Physical Interactions	Huttlin-Gygi-2015
AFF1	ELL3	0.2086	Physical Interactions	Huttlin-Gygi-2015
AFF1	CDK9	0.159088	Physical Interactions	Huttlin-Gygi-2015
CDK9	AFF4	0.163919	Physical Interactions	Varjosalo-Gstaiger-2013 A
CDK9	MLLT3	0.294004	Physical Interactions	Varjosalo-Gstaiger-2013 A
AFF1	CDK9	0.294004	Physical Interactions	Varjosalo-Gstaiger-2013 A
EAF1	ELL2	0.14279	Physical Interactions	IREF-huri
ELL3	EAF1	0.290576	Physical Interactions	IREF-huri
EAF1	ELL2	0.0351267	Physical Interactions	IREF-biogrid
ELL3	EAF1	0.0430825	Physical Interactions	IREF-biogrid
AFF4	ELL2	0.0677312	Physical Interactions	IREF-biogrid
AFF4	EAF1	0.0241958	Physical Interactions	IREF-biogrid
AFF4	ELL3	0.0830715	Physical Interactions	IREF-biogrid
ELL	EAF1	0.024672	Physical Interactions	IREF-biogrid
ELL	ELL3	0.0847065	Physical Interactions	IREF-biogrid
ELL	AFF4	0.0475725	Physical Interactions	IREF-biogrid
MLLT3	ELL2	0.0539959	Physical Interactions	IREF-biogrid
MLLT3	EAF1	0.0192891	Physical Interactions	IREF-biogrid
MLLT3	ELL3	0.0662253	Physical Interactions	IREF-biogrid
MLLT3	AFF4	0.0371932	Physical Interactions	IREF-biogrid
MLLT3	ELL	0.0379252	Physical Interactions	IREF-biogrid
NBEAL2	ELL2	0.264317	Physical Interactions	IREF-biogrid
CDK9	ELL2	0.0108445	Physical Interactions	IREF-biogrid
CDK9	EAF1	0.00387403	Physical Interactions	IREF-biogrid
CDK9	AFF4	0.00746988	Physical Interactions	IREF-biogrid
CDK9	ELL	0.0076169	Physical Interactions	IREF-biogrid
CDK9	MLLT3	0.00595505	Physical Interactions	IREF-biogrid
EAF2	ELL2	0.0839646	Physical Interactions	IREF-biogrid
EAF2	EAF1	0.0299949	Physical Interactions	IREF-biogrid
EAF2	ELL3	0.102982	Physical Interactions	IREF-biogrid
EAF2	AFF4	0.0578361	Physical Interactions	IREF-biogrid
EAF2	ELL	0.0589744	Physical Interactions	IREF-biogrid
EFR3A	ELL2	0.0892618	Physical Interactions	IREF-biogrid
EAF1	ELL2	0.831254	Predicted	Wu-Stein-2010
ELL	EAF1	0.29242	Predicted	Wu-Stein-2010
CDK9	AFF4	0.175707	Predicted	Wu-Stein-2010
EAF2	ELL	0.625566	Predicted	Wu-Stein-2010
CDK9	ELL2	0.142226	Predicted	I2D-IntAct-Mouse2Human
CDK9	AFF4	0.111017	Predicted	I2D-IntAct-Mouse2Human
ELL3	ELL2	0.17842	Shared protein domains	INTERPRO
ELL	ELL2	0.0704456	Shared protein domains	INTERPRO
ELL	ELL3	0.178358	Shared protein domains	INTERPRO
OCEL1	ELL2	0.106066	Shared protein domains	INTERPRO
OCEL1	ELL3	0.308008	Shared protein domains	INTERPRO
OCEL1	ELL	0.106029	Shared protein domains	INTERPRO
EAF2	EAF1	1	Shared protein domains	INTERPRO
EFR3A	PPP2R5C	0.00604995	Shared protein domains	INTERPRO
MARVELD2	ELL2	0.0316983	Shared protein domains	INTERPRO
MARVELD2	ELL3	0.0920494	Shared protein domains	INTERPRO
MARVELD2	ELL	0.0316872	Shared protein domains	INTERPRO
MARVELD2	OCEL1	0.123921	Shared protein domains	INTERPRO
OCLN	ELL2	0.0243056	Shared protein domains	INTERPRO
OCLN	ELL3	0.0705817	Shared protein domains	INTERPRO
OCLN	ELL	0.0242971	Shared protein domains	INTERPRO
OCLN	OCEL1	0.0950204	Shared protein domains	INTERPRO
OCLN	MARVELD2	0.0478977	Shared protein domains	INTERPRO
AFF1	AFF4	0.333333	Shared protein domains	INTERPRO
ELL3	ELL2	0.327164	Shared protein domains	PFAM
ELL	ELL2	0.327164	Shared protein domains	PFAM
ELL	ELL3	0.327164	Shared protein domains	PFAM
OCEL1	ELL2	0.206252	Shared protein domains	PFAM
OCEL1	ELL3	0.206252	Shared protein domains	PFAM
OCEL1	ELL	0.206252	Shared protein domains	PFAM
EAF2	EAF1	1	Shared protein domains	PFAM
MARVELD2	ELL2	0.0722906	Shared protein domains	PFAM
MARVELD2	ELL3	0.0722906	Shared protein domains	PFAM
MARVELD2	ELL	0.0722906	Shared protein domains	PFAM
MARVELD2	OCEL1	0.103247	Shared protein domains	PFAM
OCLN	ELL2	0.0722906	Shared protein domains	PFAM
OCLN	ELL3	0.0722906	Shared protein domains	PFAM
OCLN	ELL	0.0722906	Shared protein domains	PFAM
OCLN	OCEL1	0.103247	Shared protein domains	PFAM
OCLN	MARVELD2	0.0620433	Shared protein domains	PFAM
AFF1	AFF4	0.333333	Shared protein domains	PFAM
