# Supplementary material for: Comprehensive analysis reveals key genes and environmental toxin exposures underlying treatment response in ulcerative colitis based on in-silico analysis and Mendelian randomization
Source: Aging (Albany NY). 2023 Dec 4;15(23):14141–71. doi: 10.18632/aging.205294 (PMC10756092; doi:10.18632/aging.205294)
Supplement: Supplementary Table 5 [file aging-15-205294-s006.xls]

## Sheet: Supplementary Table 5
Supplementary Table 5. The DEGs between uninflamed and inflamed UC in GSE179285 cohort.
Tag	logFC	AveExpr	t	P.Value	adj.P.Val	B
PAQR5	-0.886724	0.834808	-9.07968	1.47739e-12	2.94016e-08	18.2919
PDE6A	-2.21986	2.44313	-8.88631	3.02113e-12	3.00618e-08	17.6098
TIMP1	1.78264	-0.689512	8.4748	1.3985e-11	8.74746e-08	16.1469
PKIB	-1.60796	3.87892	-8.41361	1.75819e-11	8.74746e-08	15.9282
TESC	1.54751	-1.7682	8.30583	2.63285e-11	9.73132e-08	15.5423
PPP2R3A	-0.772969	0.565994	-8.21977	3.6364e-11	9.73132e-08	15.2335
ZDHHC23	-0.811472	1.33597	-8.21414	3.71405e-11	9.73132e-08	15.2133
BRD3OS	0.745663	-1.38099	8.18817	4.09452e-11	9.73132e-08	15.1201
GPD1L	-0.651841	1.48748	-8.13036	5.08822e-11	9.73132e-08	14.9122
CDH3	2.35934	-0.00920582	8.11027	5.48753e-11	9.73132e-08	14.84
CA2	-1.58361	6.32465	-8.10521	5.59288e-11	9.73132e-08	14.8218
MIER2	0.244265	-0.154332	8.08829	5.96045e-11	9.73132e-08	14.7609
PPARG	-0.961685	2.4559	-8.07118	6.35683e-11	9.73132e-08	14.6993
TMEM184B	0.665851	0.214204	7.99944	8.32759e-11	1.18377e-07	14.4409
PXMP2	-0.897398	1.11976	-7.95234	9.94477e-11	1.2823e-07	14.2711
FUT8	0.966851	0.298256	7.93552	1.05956e-10	1.2823e-07	14.2105
WSCD1	-1.28622	1.23474	-7.91943	1.1258e-10	1.2823e-07	14.1524
CYP4F8	-1.00013	3.04401	-7.91154	1.15981e-10	1.2823e-07	14.1239
PRR15	-0.998935	4.53677	-7.85081	1.4583e-10	1.52115e-07	13.9047
ST3GAL2	0.354821	-0.460612	7.83832	1.52871e-10	1.52115e-07	13.8596
SLC35G1	-0.983982	1.17718	-7.81944	1.6416e-10	1.53157e-07	13.7914
DHRS11	-1.44775	2.28653	-7.81125	1.69311e-10	1.53157e-07	13.7618
RMDN2	-1.05574	2.05392	-7.73903	2.22382e-10	1.84955e-07	13.5008
SLC22A5	-1.40044	2.07115	-7.73824	2.2305e-10	1.84955e-07	13.4979
GMPR	0.536211	-0.599725	7.70863	2.49443e-10	1.93478e-07	13.3908
SGMS1	0.815357	0.562001	7.70512	2.52772e-10	1.93478e-07	13.3781
SLC26A2	-2.95441	3.36933	-7.65141	3.09651e-10	2.28236e-07	13.1838
TMEM161B	-0.330983	-0.146578	-7.61661	3.53187e-10	2.51028e-07	13.0578
DACT2	-1.45659	1.29544	-7.60306	3.71755e-10	2.53693e-07	13.0087
PLS3	0.903091	-1.00455	7.59557	3.82432e-10	2.53693e-07	12.9816
C2CD4B	1.51593	2.76724	7.57736	4.09705e-10	2.63017e-07	12.9157
FRMD1	-0.585884	0.928994	-7.56234	4.33645e-10	2.69686e-07	12.8613
BACE2	1.03275	0.351725	7.53404	4.82626e-10	2.86605e-07	12.7588
SLC51B	-1.22408	4.40128	-7.53022	4.89652e-10	2.86605e-07	12.7449
ARFGAP3	0.92075	0.289815	7.47717	5.98498e-10	3.40306e-07	12.5526
PPFIA3	-0.596988	0.0689377	-7.46952	6.16058e-10	3.4056e-07	12.5249
MYL5	-0.651127	0.971043	-7.44677	6.71458e-10	3.50348e-07	12.4425
RBPMS	0.549937	-0.170938	7.44487	6.76287e-10	3.50348e-07	12.4356
LMCD1	1.04305	-0.277612	7.44088	6.86576e-10	3.50348e-07	12.4211
CFI	1.60778	-0.907861	7.43214	7.09678e-10	3.53082e-07	12.3894
PDPN	1.50512	-1.16948	7.42232	7.36551e-10	3.57514e-07	12.3538
LINC00963	0.618293	-0.500723	7.39607	8.13488e-10	3.85458e-07	12.2586
TDP2	-1.08157	3.0508	-7.38752	8.4025e-10	3.8888e-07	12.2276
DIO3OS	-1.14866	1.48037	-7.36829	9.03679e-10	3.99328e-07	12.1579
IFI6	1.19644	0.305749	7.35745	9.41541e-10	3.99328e-07	12.1186
FAM151A	-1.80914	1.8055	-7.35449	9.52141e-10	3.99328e-07	12.1079
ACSF2	-1.17489	0.572853	-7.35313	9.57063e-10	3.99328e-07	12.1029
COX5AP1	-0.523438	0.975378	-7.3441	9.90352e-10	3.99328e-07	12.0702
SRPX2	0.947138	0.25885	7.34256	9.96152e-10	3.99328e-07	12.0646
ZNF681	-0.452202	-0.155927	-7.34067	1.00329e-09	3.99328e-07	12.0577
RCN1	0.682751	-0.426009	7.33365	1.03031e-09	4.02043e-07	12.0323
ANXA5	0.640909	-0.639893	7.3089	1.13152e-09	4.33047e-07	11.9425
ZSWIM3	-0.493303	0.471733	-7.30157	1.16337e-09	4.36835e-07	11.9159
CYC1	-0.513496	0.53327	-7.2907	1.21222e-09	4.46746e-07	11.8765
PLCE1	-0.772371	3.09108	-7.28132	1.25604e-09	4.5448e-07	11.8425
KCNJ2	-0.6936	3.25473	-7.26608	1.33068e-09	4.70317e-07	11.7871
MMP7	3.09732	2.19717	7.26067	1.35819e-09	4.70317e-07	11.7675
MPG	0.435191	-0.216564	7.25825	1.3707e-09	4.70317e-07	11.7587
C7orf31	-0.685353	0.864691	-7.22109	1.57779e-09	5.2305e-07	11.6239
PSKH1	-0.451055	0.81915	-7.21722	1.60109e-09	5.2305e-07	11.6099
COL4A1	1.1034	0.604628	7.21643	1.60591e-09	5.2305e-07	11.607
MDH2	-0.401588	0.32982	-7.20815	1.65702e-09	5.2305e-07	11.577
ARNTL2	0.678577	-0.585835	7.20425	1.68168e-09	5.2305e-07	11.5628
SLC29A1	0.390116	-0.981322	7.20419	1.68209e-09	5.2305e-07	11.5626
ANXA1	1.80697	-1.28169	7.18285	1.82358e-09	5.58325e-07	11.4852
RAPGEFL1	-0.828195	2.09289	-7.17872	1.85234e-09	5.58538e-07	11.4702
GBA3	-1.99619	3.48741	-7.1593	1.99372e-09	5.92194e-07	11.3997
MFSD12	0.64407	-2.13295	7.14113	2.13567e-09	5.98271e-07	11.3338
SELENBP1	-1.07232	2.98333	-7.14091	2.1375e-09	5.98271e-07	11.333
SLC6A14	2.08607	0.724501	7.14013	2.14382e-09	5.98271e-07	11.3302
ATP23	-0.571307	0.469504	-7.13985	2.1461e-09	5.98271e-07	11.3291
PORCN	0.453729	-1.24371	7.13759	2.16449e-09	5.98271e-07	11.321
COL18A1	0.959056	-0.982632	7.1292	2.23438e-09	6.09129e-07	11.2905
CXCL1	3.71265	2.02417	7.11836	2.32803e-09	6.26082e-07	11.2512
SHISA5	0.413107	0.183797	7.09224	2.56996e-09	6.72975e-07	11.1564
PACS1	0.372725	-0.295624	7.0889	2.60271e-09	6.72975e-07	11.1443
LINC02532	-1.10758	1.85136	-7.08878	2.60384e-09	6.72975e-07	11.1439
SIL1	0.647024	0.516115	7.07769	2.71552e-09	6.87383e-07	11.1036
NUAK2	-0.659556	1.54977	-7.07641	2.72867e-09	6.87383e-07	11.099
VWA1	0.828116	0.887124	7.06016	2.90183e-09	7.15376e-07	11.04
MMP14	0.536446	-1.12078	7.05638	2.94373e-09	7.15376e-07	11.0263
EPB41L4B	-0.848706	1.8024	-7.05603	2.94763e-09	7.15376e-07	11.025
GXYLT2	-1.06555	-1.00348	-7.04062	3.12463e-09	7.49197e-07	10.9691
PDK2	-0.756437	0.871809	-7.03016	3.25081e-09	7.70172e-07	10.9312
WNT5A	1.08633	-1.3997	7.01373	3.45944e-09	8.08342e-07	10.8716
SHC2	0.767467	-0.608682	7.01117	3.49316e-09	8.08342e-07	10.8623
TGFBI	1.31578	-0.532117	7.00527	3.57208e-09	8.17104e-07	10.8409
RAB36	0.747599	-0.651897	6.98838	3.80788e-09	8.61142e-07	10.7796
COL1A1	1.25966	0.847432	6.97083	4.06937e-09	9.09939e-07	10.716
TEX11	-1.21581	1.93967	-6.95945	4.24847e-09	9.37929e-07	10.6747
SRI	-0.859815	2.43917	-6.95695	4.28881e-09	9.37929e-07	10.6656
TMEM45A	1.04646	-2.15739	6.949	4.41981e-09	9.56072e-07	10.6368
SERPINA1	1.09928	-0.482307	6.93886	4.59278e-09	9.82805e-07	10.6
TMEM38B	-0.720063	-0.136867	-6.932	4.71354e-09	9.97916e-07	10.5751
LTK	-0.985577	1.67733	-6.92629	4.81652e-09	1.00898e-06	10.5544
TNNC2	-1.61071	2.75911	-6.91439	5.03828e-09	1.02352e-06	10.5113
TNFRSF10C	1.0168	0.701631	6.91375	5.0505e-09	1.02352e-06	10.509
DDAH2	-0.776318	0.961855	-6.91194	5.08527e-09	1.02352e-06	10.5024
DEPDC5	-0.330692	1.41685	-6.91161	5.09162e-09	1.02352e-06	10.5012
GUCA2A	-2.0398	4.6606	-6.90397	5.2409e-09	1.04299e-06	10.4735
BMP3	-0.974221	0.675165	-6.88522	5.62624e-09	1.10859e-06	10.4055
CIPC	-0.786381	1.17801	-6.87913	5.75731e-09	1.1233e-06	10.3834
MT3	-0.828445	0.65433	-6.87037	5.95145e-09	1.1499e-06	10.3517
NCBP2AS2	-0.442778	0.103032	-6.86346	6.10886e-09	1.16897e-06	10.3266
HNF1A-AS1	-0.834202	1.45614	-6.8407	6.65825e-09	1.25504e-06	10.2441
SLC39A13	0.50518	-0.173534	6.83964	6.6848e-09	1.25504e-06	10.2403
F3	0.812433	1.81829	6.83714	6.74841e-09	1.25514e-06	10.2312
SLC12A4	0.648722	-1.25995	6.82939	6.94909e-09	1.2805e-06	10.2031
TUBAL3	-1.32712	4.02403	-6.82099	7.17327e-09	1.28881e-06	10.1727
GABRP	0.991391	0.756229	6.82076	7.17971e-09	1.28881e-06	10.1718
SPON2	1.62402	0.49745	6.81825	7.24797e-09	1.28881e-06	10.1628
PADI2	-1.20868	2.04279	-6.81806	7.25327e-09	1.28881e-06	10.1621
PDIA5	0.468476	0.577864	6.81305	7.39209e-09	1.30186e-06	10.1439
PLAU	1.58137	-0.47623	6.80651	7.57724e-09	1.31313e-06	10.1202
LOXL2	1.2362	-2.62762	6.80491	7.62296e-09	1.31313e-06	10.1144
ENTPD5	-0.883964	1.31719	-6.80092	7.739e-09	1.31313e-06	10.1
ENSG00000285304	-0.646018	-0.373546	-6.79915	7.79097e-09	1.31313e-06	10.0935
NEBL	0.76317	0.825235	6.7967	7.86356e-09	1.31313e-06	10.0847
RTEL1-TNFRSF6B	2.31114	1.40146	6.79546	7.90034e-09	1.31313e-06	10.0802
CDR2L	0.599851	-1.09233	6.79487	7.91799e-09	1.31313e-06	10.078
ARHGAP44	-0.894072	2.52674	-6.78842	8.11338e-09	1.3241e-06	10.0547
VASN	1.19152	-2.39525	6.7883	8.11719e-09	1.3241e-06	10.0542
KLK11	1.47179	-1.0934	6.77722	8.46446e-09	1.34734e-06	10.0141
IMPA2	-0.72716	1.30541	-6.7757	8.51325e-09	1.34734e-06	10.0086
PCDH17	1.20946	1.19248	6.77294	8.60233e-09	1.34734e-06	9.99861
SPARC	1.38098	-1.55862	6.77119	8.65952e-09	1.34734e-06	9.99226
ACOX1	-0.873978	1.48461	-6.77061	8.6787e-09	1.34734e-06	9.99014
P3H1	0.818868	-1.63361	6.76866	8.74292e-09	1.34734e-06	9.98307
DRAM1	1.05071	0.115889	6.76831	8.75428e-09	1.34734e-06	9.98183
CLYBL	-0.631492	1.01187	-6.76689	8.8013e-09	1.34734e-06	9.97669
SOX17	0.696309	1.25006	6.76365	8.90984e-09	1.35355e-06	9.96495
ADGRG6	0.844235	-0.57653	6.76008	9.03081e-09	1.36153e-06	9.95202
ACOT13	-0.566573	0.30442	-6.752	9.3109e-09	1.3932e-06	9.92275
MTCL1	1.10965	-1.18666	6.74218	9.66322e-09	1.43513e-06	9.88716
IFI16	0.930592	-0.822592	6.72912	1.0152e-08	1.48697e-06	9.83988
FRAT2	-0.504854	1.55298	-6.72886	1.01617e-08	1.48697e-06	9.83896
PHB2	-0.349372	-0.349088	-6.72276	1.03988e-08	1.49153e-06	9.81685
HDAC7	0.71551	-0.777685	6.7223	1.0417e-08	1.49153e-06	9.81518
IL1RN	0.981225	0.646406	6.71869	1.05601e-08	1.49153e-06	9.8021
CYP4F12	-0.9711	2.75152	-6.71845	1.05697e-08	1.49153e-06	9.80123
COX5B	-0.591962	1.28143	-6.71691	1.06311e-08	1.49153e-06	9.79568
ATP5PB	-0.517985	0.840941	-6.71663	1.06426e-08	1.49153e-06	9.79465
HM13	0.455964	-0.200023	6.70889	1.09582e-08	1.52503e-06	9.76664
ZNF91	-0.517707	0.44482	-6.70163	1.1263e-08	1.55656e-06	9.74035
WDR78	-0.930777	1.64568	-6.69407	1.15895e-08	1.58128e-06	9.71297
RPS6KA2	0.810536	0.469896	6.69259	1.16542e-08	1.58128e-06	9.70762
CFB	1.72584	0.43998	6.692	1.16802e-08	1.58128e-06	9.70549
HYAL2	0.71028	-0.339155	6.68974	1.17805e-08	1.58222e-06	9.6973
RUNDC3B	-0.985524	1.63901	-6.68677	1.19132e-08	1.58222e-06	9.68656
LIMS1	0.431028	-0.343008	6.68649	1.19257e-08	1.58222e-06	9.68556
MKKS	-0.369575	0.324271	-6.67842	1.22949e-08	1.60373e-06	9.65635
SORBS3	-0.849046	0.117608	-6.67595	1.24104e-08	1.60373e-06	9.64738
HIGD2A	-0.444762	0.95314	-6.67532	1.24396e-08	1.60373e-06	9.64513
MEDAG	0.71329	0.394634	6.67386	1.25085e-08	1.60373e-06	9.63984
UBE2L6	0.949028	0.604383	6.67239	1.25783e-08	1.60373e-06	9.6345
APH1B	0.692946	0.450537	6.6713	1.26301e-08	1.60373e-06	9.63057
CIAO2A	-0.419344	0.420108	-6.67014	1.26857e-08	1.60373e-06	9.62635
PLEKHN1	0.733269	-0.849734	6.66916	1.27325e-08	1.60373e-06	9.62283
PALLD	0.539227	1.01373	6.66168	1.30976e-08	1.62595e-06	9.59574
FAP	1.69503	-1.292	6.66164	1.30992e-08	1.62595e-06	9.59562
ATP5MG	-0.302617	0.541521	-6.66054	1.3154e-08	1.62595e-06	9.59162
PHLDA1	0.822495	-1.58707	6.65395	1.34851e-08	1.65004e-06	9.56779
IGFBP5	1.19937	-0.870478	6.65337	1.35147e-08	1.65004e-06	9.56569
CALU	0.678678	-1.95697	6.64842	1.37698e-08	1.66921e-06	9.54777
VSIG10	-0.849282	2.07411	-6.64708	1.38395e-08	1.66921e-06	9.54294
C9orf24	-1.14545	1.85381	-6.64241	1.40856e-08	1.68866e-06	9.52605
P2RY1	-0.86233	1.3493	-6.63512	1.44789e-08	1.72542e-06	9.49966
ANGPTL2	0.902025	-0.438751	6.63281	1.46054e-08	1.73014e-06	9.49132
ZNF57	-0.668186	1.18378	-6.63041	1.47388e-08	1.73561e-06	9.4826
AIFM3	-1.06341	3.15621	-6.62181	1.52251e-08	1.77397e-06	9.4515
AQP8	-2.26987	3.15703	-6.6215	1.52429e-08	1.77397e-06	9.45038
MSI2	0.562711	-0.251734	6.60917	1.59686e-08	1.84762e-06	9.40581
CARD6	1.35717	0.124747	6.59901	1.65929e-08	1.90406e-06	9.36907
AGT	1.18742	-2.91858	6.59814	1.66477e-08	1.90406e-06	9.3659
ESRRA	-0.554113	1.60091	-6.58467	1.75155e-08	1.99186e-06	9.31721
ENG	0.786556	-0.421624	6.57644	1.80681e-08	2.04302e-06	9.28745
SPHK1	0.828008	-2.12817	6.57262	1.833e-08	2.06093e-06	9.27366
DUSP10	0.43348	-0.435363	6.56725	1.87055e-08	2.09134e-06	9.25423
COL6A3	0.909619	0.130302	6.56126	1.91327e-08	2.11859e-06	9.23259
PHLPP2	-1.27344	1.95979	-6.56085	1.91622e-08	2.11859e-06	9.23112
JMJD7	0.404555	0.792703	6.55798	1.93708e-08	2.1192e-06	9.22074
TRIM29	0.763375	0.00294339	6.55784	1.93807e-08	2.1192e-06	9.22025
WFS1	0.514205	-0.387545	6.54919	2.00238e-08	2.17756e-06	9.18897
ACSL4	0.507306	-0.937393	6.53942	2.07749e-08	2.24526e-06	9.15369
KDELR3	1.13694	0.630806	6.53819	2.0872e-08	2.24526e-06	9.14922
RDH5	-0.767619	1.79697	-6.53371	2.12272e-08	2.26579e-06	9.13305
SETD7	0.332224	0.214597	6.53258	2.13176e-08	2.26579e-06	9.12898
IFT74	-0.514104	1.16728	-6.53151	2.14044e-08	2.26579e-06	9.12509
CLPB	0.430233	-1.0979	6.52759	2.17223e-08	2.27715e-06	9.11096
PDGFRB	1.16488	0.503405	6.52733	2.17444e-08	2.27715e-06	9.10999
GNA15	0.67692	-0.601689	6.52598	2.1855e-08	2.27715e-06	9.10513
ESAM	0.601011	1.45111	6.5232	2.20848e-08	2.28912e-06	9.0951
RHOQ	0.456337	-0.236784	6.51452	2.282e-08	2.35067e-06	9.06373
SERPINB5	1.24487	0.621535	6.51342	2.29149e-08	2.35067e-06	9.05975
STAP2	-0.508016	2.5643	-6.50751	2.34306e-08	2.37244e-06	9.03842
RPS6KA6	-0.348043	0.470737	-6.50743	2.34377e-08	2.37244e-06	9.03813
FGFR3	-0.624816	-0.226916	-6.5069	2.34848e-08	2.37244e-06	9.03621
TNMD	-0.46786	-0.0447622	-6.50427	2.37185e-08	2.37422e-06	9.02672
ABCD3	-0.461978	0.840009	-6.50402	2.3741e-08	2.37422e-06	9.02581
DOLPP1	-0.327215	0.574023	-6.48768	2.52484e-08	2.50048e-06	8.96683
TRIM36	-0.680809	1.73816	-6.48646	2.53653e-08	2.50048e-06	8.96241
FSTL1	0.400695	-0.705713	6.4863	2.53804e-08	2.50048e-06	8.96184
SOWAHA	-0.705544	2.98595	-6.48358	2.56414e-08	2.51374e-06	8.95204
COX5A	-0.512067	1.10251	-6.47788	2.61987e-08	2.54897e-06	8.93143
FASTKD1	-0.380534	0.227524	-6.4772	2.62658e-08	2.54897e-06	8.92899
HR	-0.411177	1.30662	-6.47548	2.64367e-08	2.54897e-06	8.92277
WARS	1.12123	-0.535203	6.47471	2.65131e-08	2.54897e-06	8.92001
B9D1	0.739582	-0.446325	6.47317	2.6667e-08	2.55144e-06	8.91446
RHOU	-1.03338	1.50102	-6.47061	2.69257e-08	2.55279e-06	8.90521
PEX19	-0.388916	0.0548622	-6.4698	2.70077e-08	2.55279e-06	8.9023
PAPSS1	0.438925	-0.283192	6.46819	2.71728e-08	2.55279e-06	8.89646
ZNF564	-0.349503	0.850579	-6.46798	2.71942e-08	2.55279e-06	8.8957
MYO1D	-0.598832	2.23028	-6.46435	2.75684e-08	2.57577e-06	8.88261
DDIT4	0.782893	-1.91987	6.45492	2.85649e-08	2.64521e-06	8.84859
NMT2	-0.463351	0.18364	-6.45418	2.8645e-08	2.64521e-06	8.84591
PTGDR	-1.02817	2.43355	-6.45279	2.87954e-08	2.64521e-06	8.84089
MXRA5	1.11126	0.943901	6.45235	2.88433e-08	2.64521e-06	8.8393
FZD9	0.639539	-0.950458	6.44865	2.92474e-08	2.66997e-06	8.82597
ZNF675	-0.443797	-0.300124	-6.44486	2.96681e-08	2.68447e-06	8.81228
MCAM	0.773377	-0.87628	6.44479	2.96761e-08	2.68447e-06	8.81203
HIF1A	0.920854	-0.339843	6.43852	3.03841e-08	2.73608e-06	8.78944
MICU2	-0.357571	0.825616	-6.43726	3.0529e-08	2.73675e-06	8.78488
PPARGC1A	-0.881195	0.916048	-6.43147	3.12013e-08	2.78447e-06	8.76401
MTMR11	-0.756303	2.77115	-6.429	3.14936e-08	2.7961e-06	8.75508
TRAPPC10	-0.565055	1.24666	-6.428	3.16126e-08	2.7961e-06	8.75147
PML	0.449346	0.365517	6.42489	3.19846e-08	2.79762e-06	8.74026
ALDH18A1	-0.754956	0.743893	-6.42468	3.201e-08	2.79762e-06	8.7395
COPZ2	0.553354	-0.833682	6.42433	3.20516e-08	2.79762e-06	8.73826
FBXL3	-0.468321	1.32656	-6.42129	3.24206e-08	2.81748e-06	8.72729
IGSF9	-1.00882	2.34789	-6.41448	3.32627e-08	2.87809e-06	8.70272
CCDC3	1.64968	1.42469	6.41166	3.36171e-08	2.89616e-06	8.69257
OPN3	-0.772331	0.247822	-6.40203	3.48577e-08	2.9901e-06	8.65785
AGFG2	-0.424337	0.634279	-6.39798	3.53931e-08	3.02299e-06	8.64325
ACVR1C	-0.878717	1.8255	-6.39617	3.56354e-08	3.02411e-06	8.63671
TGM2	1.15328	-0.181741	6.39561	3.571e-08	3.02411e-06	8.63471
CTHRC1	1.42693	-1.65989	6.39237	3.61481e-08	3.04824e-06	8.62303
SPNS2	1.12709	2.30825	6.38894	3.66179e-08	3.06334e-06	8.61066
ELK3	0.582545	-0.18552	6.38881	3.66351e-08	3.06334e-06	8.61021
GALK1	0.550624	-0.881651	6.38555	3.7088e-08	3.08823e-06	8.59844
C6orf136	-0.55067	1.05591	-6.38077	3.77611e-08	3.13119e-06	8.58121
LRRC19	-0.704723	6.60681	-6.37895	3.80204e-08	3.1396e-06	8.57465
GPX8	0.827739	-1.51882	6.37695	3.83066e-08	3.15016e-06	8.56747
CEP112	0.318244	-0.0230222	6.36977	3.93557e-08	3.22312e-06	8.54159
ZNF730	-0.440218	0.0382134	-6.36671	3.98117e-08	3.2471e-06	8.53055
LAMB2	0.75465	-0.968702	6.36149	4.05997e-08	3.29786e-06	8.51178
THY1	0.978814	-0.503561	6.35657	4.13585e-08	3.33805e-06	8.49404
SDHD	-0.562801	1.23466	-6.35585	4.14696e-08	3.33805e-06	8.49147
ME3	-0.614379	1.80924	-6.3548	4.16346e-08	3.33805e-06	8.48766
ARHGEF9	-0.381322	0.543195	-6.35353	4.18331e-08	3.33805e-06	8.48311
ITGA1	0.619316	0.073112	6.35218	4.20461e-08	3.33805e-06	8.47824
BHLHE40	0.57512	-0.348562	6.35184	4.21009e-08	3.33805e-06	8.477
VDR	-0.605273	4.0282	-6.35017	4.23658e-08	3.34572e-06	8.47099
FUT1	0.605961	-0.346015	6.34878	4.25875e-08	3.34994e-06	8.46599
NEURL1B	-0.813012	2.94427	-6.34738	4.28116e-08	3.3543e-06	8.46096
ARHGAP42	-0.527055	1.21896	-6.34583	4.30629e-08	3.36077e-06	8.45535
PDZD3	-0.883757	2.79996	-6.34478	4.3232e-08	3.36078e-06	8.4516
ASPHD2	0.696183	1.39643	6.34086	4.38739e-08	3.38521e-06	8.43748
SGK2	-0.932538	2.86	-6.34079	4.38864e-08	3.38521e-06	8.43721
SSTR1	-0.441193	0.623685	-6.33563	4.4746e-08	3.43819e-06	8.41863
GSTP1	0.628358	0.602162	6.33049	4.56182e-08	3.4889e-06	8.40014
ORAI2	0.831261	-1.03555	6.32968	4.57566e-08	3.4889e-06	8.39723
ZNF117	-0.354817	-0.376351	-6.325	4.65697e-08	3.52803e-06	8.38036
FAHD1	-0.489166	1.03658	-6.32383	4.67734e-08	3.52803e-06	8.37618
LYRM7	-0.338328	-0.24977	-6.32367	4.68016e-08	3.52803e-06	8.3756
USP30	-0.441448	0.585873	-6.31662	4.80591e-08	3.58795e-06	8.35021
SUGCT	-1.00949	0.498422	-6.31644	4.80912e-08	3.58795e-06	8.34957
FKBP7	0.618273	-0.908032	6.31528	4.8301e-08	3.58795e-06	8.3454
FAM155A	0.858605	-0.958053	6.31519	4.83177e-08	3.58795e-06	8.34507
NR1I2	-0.687428	2.63306	-6.31253	4.88026e-08	3.59086e-06	8.3355
ACAT1	-0.78503	-0.0744824	-6.31195	4.89094e-08	3.59086e-06	8.33341
CDK20	-0.789493	0.798967	-6.31191	4.89161e-08	3.59086e-06	8.33328
CREB3L2	0.831538	-0.0510568	6.31103	4.90786e-08	3.59086e-06	8.3301
ARMCX3	0.339725	0.353149	6.30833	4.95784e-08	3.61413e-06	8.3204
FADS1	0.885663	-3.04872	6.306	5.00147e-08	3.62634e-06	8.312
TINCR	-0.83222	-0.09992	-6.30549	5.01102e-08	3.62634e-06	8.31018
RAB31	0.956201	-1.0056	6.30399	5.03944e-08	3.62713e-06	8.30476
ZNF714	-0.423347	-0.251818	-6.30351	5.04856e-08	3.62713e-06	8.30303
TTYH3	0.655619	-0.906473	6.30159	5.08493e-08	3.64012e-06	8.29615
ADH1A	-1.03794	3.99019	-6.30039	5.10804e-08	3.64355e-06	8.29181
ZCCHC14	-0.44197	0.0799556	-6.29934	5.12819e-08	3.64486e-06	8.28804
FAM241A	0.674493	0.665729	6.29534	5.20574e-08	3.68682e-06	8.27366
METTL7A	-0.850255	1.1018	-6.28956	5.32007e-08	3.74687e-06	8.25286
CASP4	0.806474	0.616499	6.28915	5.3282e-08	3.74687e-06	8.25139
PPFIBP2	-0.377065	2.00979	-6.28653	5.38087e-08	3.76196e-06	8.24197
TMEM165	0.652858	0.371548	6.28619	5.38779e-08	3.76196e-06	8.24074
ATPAF1	-0.379257	0.160635	-6.28469	5.41812e-08	3.76196e-06	8.23536
DYSF	0.74842	0.380738	6.28434	5.42527e-08	3.76196e-06	8.2341
HTRA1	1.15748	-1.48653	6.28279	5.45697e-08	3.77081e-06	8.22852
TRPM4	-0.6003	2.50387	-6.27967	5.52127e-08	3.79745e-06	8.2173
LRRC75A	-0.673025	4.08824	-6.27885	5.53826e-08	3.79745e-06	8.21436
UNC5CL	0.916157	0.949946	6.27751	5.56624e-08	3.79745e-06	8.20953
S100A11	0.984863	0.143958	6.27724	5.57186e-08	3.79745e-06	8.20857
ITPKA	-1.09227	1.46375	-6.27422	5.63535e-08	3.80977e-06	8.19771
PRSS22	1.06587	0.963507	6.27354	5.64987e-08	3.80977e-06	8.19525
TRMT112	0.449619	-0.987458	6.27286	5.66417e-08	3.80977e-06	8.19283
DNAJC11	-0.336772	0.276733	-6.27275	5.66651e-08	3.80977e-06	8.19243
ADH1C	-1.37573	5.67548	-6.26586	5.81502e-08	3.89302e-06	8.16765
PRADC1	-0.489642	0.891254	-6.2652	5.82946e-08	3.89302e-06	8.16528
ACADS	-0.809886	1.98452	-6.26316	5.87424e-08	3.8967e-06	8.15795
BTBD3	-0.559728	0.478985	-6.26163	5.90824e-08	3.8967e-06	8.15242
DUSP4	0.708986	-2.05661	6.261	5.9222e-08	3.8967e-06	8.15016
CHKA	-0.539147	-0.336601	-6.26094	5.92353e-08	3.8967e-06	8.14995
TUBB2A	0.695285	-1.28846	6.26052	5.93288e-08	3.8967e-06	8.14844
PTGS2	0.700593	-0.466693	6.25618	6.03024e-08	3.94763e-06	8.13285
LIPC	-1.06104	-0.780547	-6.25383	6.08352e-08	3.96119e-06	8.12442
EDN2	-1.81859	1.61391	-6.25352	6.09076e-08	3.96119e-06	8.12328
KCNK5	-1.05088	1.97638	-6.25036	6.16339e-08	3.99536e-06	8.11193
PAPSS2	-0.63459	3.55141	-6.24742	6.23161e-08	4.02647e-06	8.10139
PLA2G12B	-1.0764	0.766885	-6.24651	6.25295e-08	4.02718e-06	8.09812
ASB13	-0.645264	0.665892	-6.24358	6.32226e-08	4.04933e-06	8.08756
OSBPL1A	-0.53428	0.281918	-6.24264	6.34452e-08	4.04933e-06	8.08419
RILPL2	0.928732	-0.335779	6.24248	6.34838e-08	4.04933e-06	8.08361
VWF	1.22124	3.05359	6.23929	6.42479e-08	4.08498e-06	8.07215
F2R	0.663933	-1.08931	6.23751	6.46775e-08	4.09645e-06	8.06577
TMEM132A	0.754694	-1.92592	6.23612	6.5015e-08	4.09645e-06	8.06079
ZNF823	-0.438569	1.06893	-6.236	6.50459e-08	4.09645e-06	8.06033
ZNF727	-0.528368	-0.178145	-6.23351	6.56549e-08	4.12176e-06	8.0514
CDHR1	-1.06658	1.7113	-6.23213	6.59965e-08	4.13018e-06	8.04643
FKBP11	1.28383	0.0364834	6.22851	6.68974e-08	4.17343e-06	8.03345
LIPG	0.841035	1.5949	6.22659	6.73819e-08	4.18336e-06	8.02654
TRERF1	0.549001	-0.182804	6.22621	6.7477e-08	4.18336e-06	8.02519
SLC23A1	-0.530309	0.166927	-6.22538	6.76892e-08	4.18349e-06	8.02218
METTL7B	-0.774304	1.95957	-6.22306	6.8281e-08	4.207e-06	8.01385
TMEM263	0.66548	0.0550094	6.22118	6.87615e-08	4.22041e-06	8.00713
VSX1	-0.537855	1.12407	-6.22056	6.89228e-08	4.22041e-06	8.00489
ZNF716	-0.447509	-0.242263	-6.21292	7.09248e-08	4.32377e-06	7.97747
NDRG2	-0.560656	1.52814	-6.21247	7.10452e-08	4.32377e-06	7.97584
MTCH2	-0.401776	0.543374	-6.21079	7.14934e-08	4.33777e-06	7.96982
RAMP3	0.744253	0.548126	6.20983	7.17511e-08	4.33787e-06	7.96637
DMAC1	-0.280577	0.270209	-6.20917	7.1931e-08	4.33787e-06	7.96398
SDHB	-0.448166	0.70915	-6.20764	7.23447e-08	4.34964e-06	7.95848
EPB41L1	-0.55759	0.230217	-6.20641	7.26771e-08	4.35481e-06	7.95409
ZNF684	-0.384522	0.388498	-6.20571	7.28683e-08	4.35481e-06	7.95158
ACTN1	0.506154	-0.847806	6.20261	7.37203e-08	4.38874e-06	7.94045
ROBO4	0.887329	1.31259	6.20204	7.38771e-08	4.38874e-06	7.93841
TM4SF1	1.14014	-1.84209	6.20098	7.4173e-08	4.3932e-06	7.93458
AMOTL2	0.753278	-1.38809	6.19637	7.54645e-08	4.45644e-06	7.91805
APOL2	0.737758	0.724876	6.19494	7.58698e-08	4.46712e-06	7.91292
MCFD2	0.580454	-0.774093	6.18061	8.00547e-08	4.69961e-06	7.86151
PRELID3B	-0.456528	0.884514	-6.17903	8.05303e-08	4.71363e-06	7.85584
CYP2B6	-0.889516	2.14754	-6.17521	8.16919e-08	4.73865e-06	7.84213
ZNF469	0.872535	-0.223936	6.17458	8.18861e-08	4.73865e-06	7.83985
GRAMD2B	-0.633821	2.18433	-6.17433	8.19617e-08	4.73865e-06	7.83897
CNTN3	-0.755889	0.906617	-6.17307	8.23504e-08	4.73865e-06	7.83444
SLC5A1	0.94735	3.86969	6.17263	8.24841e-08	4.73865e-06	7.83288
PRR5L	-0.674807	2.54765	-6.17199	8.2684e-08	4.73865e-06	7.83057
RNF5	-0.529567	0.229983	-6.17166	8.27867e-08	4.73865e-06	7.82938
LYN	0.746712	0.800041	6.17141	8.28627e-08	4.73865e-06	7.8285
KLF2	1.06116	1.76507	6.1693	8.35224e-08	4.75969e-06	7.82091
MGP	1.24054	-0.321176	6.16846	8.37855e-08	4.75969e-06	7.8179
TFPI	0.782822	-1.93758	6.16766	8.40347e-08	4.75969e-06	7.81505
PODXL	1.03385	-2.50605	6.16718	8.41873e-08	4.75969e-06	7.81331
STX1A	0.402058	-0.711981	6.16584	8.46092e-08	4.76999e-06	7.80853
FMO4	-0.52063	0.97366	-6.16308	8.54904e-08	4.80606e-06	7.79861
CD70	1.14943	-2.03009	6.16167	8.59427e-08	4.81172e-06	7.79355
ENSG00000232533	0.398505	-0.473941	6.16126	8.60747e-08	4.81172e-06	7.79209
MEOX1	0.567101	0.497102	6.15857	8.69462e-08	4.84682e-06	7.78244
DUOXA2	2.21709	1.81525	6.15601	8.77821e-08	4.87975e-06	7.77328
SHD	-0.819369	2.92723	-6.15451	8.82772e-08	4.89361e-06	7.76789
AHCYL2	-0.897545	3.21216	-6.14683	9.0852e-08	5.02235e-06	7.74037
PDE8A	-0.628234	0.853981	-6.14272	9.22601e-08	5.04437e-06	7.72564
ABCB1	-1.4514	2.05392	-6.14263	9.2294e-08	5.04437e-06	7.72529
COL7A1	0.908144	-1.66974	6.14221	9.24387e-08	5.04437e-06	7.72379
LPIN1	0.543088	-0.352337	6.14122	9.27809e-08	5.04437e-06	7.72025
ETFDH	-0.700141	1.83031	-6.14112	9.28162e-08	5.04437e-06	7.71989
PCSK1	1.80774	0.0137308	6.14082	9.29202e-08	5.04437e-06	7.71881
LAMC1	0.807222	-1.04541	6.14052	9.30247e-08	5.04437e-06	7.71774
CDKL1	-0.437788	0.897796	-6.13425	9.52342e-08	5.15015e-06	7.69526
BSG	-0.802988	0.16757	-6.13261	9.58201e-08	5.16779e-06	7.68939
IDH3B	-0.318602	-0.15874	-6.13013	9.6714e-08	5.20191e-06	7.6805
DNAJC1	0.330594	0.563892	6.12746	9.76848e-08	5.23053e-06	7.67094
C9orf40	-0.602429	-0.13453	-6.12643	9.80604e-08	5.23053e-06	7.66726
SLC1A5	-0.528688	0.549311	-6.12611	9.81786e-08	5.23053e-06	7.66611
MAD2L2	0.585153	-2.32114	6.12579	9.82974e-08	5.23053e-06	7.66495
CWH43	-1.51527	3.56857	-6.12421	9.8878e-08	5.24739e-06	7.65931
ASTE1	-0.489666	0.737524	-6.12127	9.99733e-08	5.2914e-06	7.64877
CHCHD4	-0.392947	-0.276324	-6.11799	1.01206e-07	5.33459e-06	7.63703
TSEN2	-0.418162	-0.287734	-6.11751	1.01389e-07	5.33459e-06	7.63531
STRADB	-0.590139	0.317811	-6.11697	1.01593e-07	5.33459e-06	7.63337
NAT8B	-0.972214	0.839879	-6.11106	1.03866e-07	5.43957e-06	7.6122
AGBL2	-0.512459	0.130505	-6.10337	1.06895e-07	5.57955e-06	7.58468
CHAD	-0.400953	0.424506	-6.10286	1.071e-07	5.57955e-06	7.58284
PRDM4	-0.240117	0.682147	-6.10159	1.0761e-07	5.59153e-06	7.57829
FAM162A	-0.677891	0.621454	-6.09927	1.08547e-07	5.62553e-06	7.56999
NMT1	0.338488	-0.484283	6.09022	1.12282e-07	5.79247e-06	7.53761
CPT2	-0.61258	1.28979	-6.09006	1.12351e-07	5.79247e-06	7.53702
FGF2	0.633357	-0.737341	6.08546	1.14299e-07	5.87768e-06	7.52056
NUAK1	0.669505	-0.534956	6.08366	1.15072e-07	5.9022e-06	7.51411
TMEM170A	-0.55556	1.02827	-6.08134	1.16071e-07	5.93813e-06	7.50583
ENSG00000217702	1.20083	0.844146	6.08062	1.16387e-07	5.93902e-06	7.50323
DLGAP4	0.287125	-0.143046	6.07892	1.17128e-07	5.96154e-06	7.49716
PRDM1	0.748658	0.836226	6.07512	1.18802e-07	6.03131e-06	7.48357
RNASEL	-0.558922	2.13864	-6.07419	1.19217e-07	6.03468e-06	7.48023
LINC00526	-0.529923	0.62672	-6.07305	1.19727e-07	6.03468e-06	7.47615
SP5	1.03278	-3.23253	6.07293	1.19778e-07	6.03468e-06	7.47574
KLHL8	-0.421641	0.680028	-6.07063	1.20815e-07	6.07154e-06	7.46749
CD44	0.416844	-0.64603	6.06894	1.21577e-07	6.09445e-06	7.46147
C2	0.78962	0.424145	6.06489	1.23431e-07	6.16027e-06	7.44698
XBP1	0.900896	1.05615	6.06472	1.23509e-07	6.16027e-06	7.44638
CHRDL2	1.68205	1.07267	6.06307	1.24274e-07	6.18215e-06	7.44047
NOTCH4	0.53757	0.766654	6.0622	1.2468e-07	6.18215e-06	7.43734
CLCF1	0.376937	-0.0700058	6.06177	1.24879e-07	6.18215e-06	7.43581
GOT1	-0.417977	0.869456	-6.05205	1.29499e-07	6.39496e-06	7.40104
LRRN2	-1.88184	1.15078	-6.04478	1.33062e-07	6.55463e-06	7.37506
CYCS	-0.641639	1.01835	-6.04268	1.3411e-07	6.58993e-06	7.36755
TRIM47	0.443181	0.542274	6.03928	1.35824e-07	6.6577e-06	7.3554
ELL2	0.586402	-0.569103	6.03734	1.36807e-07	6.68944e-06	7.34849
OAF	-0.726425	1.04521	-6.03497	1.38027e-07	6.73252e-06	7.34
CCDC102A	0.632115	-0.657114	6.02961	1.40815e-07	6.85172e-06	7.32086
COL4A2	1.125	0.510919	6.026	1.42727e-07	6.92783e-06	7.30794
PLSCR3	0.773271	-0.494084	6.02493	1.43294e-07	6.93843e-06	7.30415
PNMA1	0.638016	-0.695349	6.02165	1.45063e-07	7.00702e-06	7.29241
ADIRF	-0.800725	4.02409	-6.01479	1.48825e-07	7.17136e-06	7.2679
ZNF726	-0.350518	-0.113678	-6.01215	1.50295e-07	7.2247e-06	7.25849
SUCLG1	-0.598142	1.28569	-6.00789	1.52706e-07	7.3229e-06	7.24326
HMGCS2	-1.12586	2.65583	-6.0044	1.54705e-07	7.4009e-06	7.23082
GJA4	0.896504	1.10794	5.99723	1.589e-07	7.58336e-06	7.20521
C4BPB	1.84406	-0.634983	5.99384	1.60922e-07	7.66148e-06	7.19311
FAM167B	0.643707	0.312898	5.99187	1.62107e-07	7.69949e-06	7.18609
CXCL2	2.02445	1.90066	5.99119	1.62518e-07	7.70063e-06	7.18366
OSBPL3	0.614163	-0.490193	5.98913	1.63771e-07	7.71272e-06	7.17631
ARID3A	0.467614	-1.78109	5.98907	1.63807e-07	7.71272e-06	7.1761
PBLD	-1.0043	2.63835	-5.98886	1.63936e-07	7.71272e-06	7.17535
DDC	-0.828222	3.86368	-5.98325	1.67398e-07	7.85703e-06	7.15535
RPP25L	-0.317744	0.459099	-5.97807	1.70667e-07	7.99164e-06	7.13684
MAOA	-0.679234	3.8875	-5.9763	1.71793e-07	8.00898e-06	7.13055
NDUFB10	-0.36256	0.588926	-5.97577	1.72135e-07	8.00898e-06	7.12864
PXDN	0.842538	-1.06699	5.9756	1.72245e-07	8.00898e-06	7.12803
BLVRA	1.01999	-1.95885	5.97184	1.74672e-07	8.05682e-06	7.11464
CEBPB	0.384149	-0.15437	5.9717	1.74764e-07	8.05682e-06	7.11414
THG1L	-0.331064	-0.0382157	-5.97155	1.74863e-07	8.05682e-06	7.1136
NACC2	0.580793	-0.741003	5.9715	1.74893e-07	8.05682e-06	7.11343
SLCO4A1	0.76982	-1.2801	5.9702	1.75743e-07	8.07728e-06	7.10879
RNF183	1.06058	1.28217	5.96888	1.7661e-07	8.09841e-06	7.10408
PGAP3	-0.511447	1.33912	-5.96763	1.77438e-07	8.11768e-06	7.09961
NIPSNAP2	-0.370046	0.112323	-5.96614	1.78424e-07	8.14409e-06	7.0943
ECI1	-0.458282	0.188971	-5.96361	1.80115e-07	8.20245e-06	7.08528
CDC27	0.421905	-0.430813	5.96222	1.8105e-07	8.22144e-06	7.08032
MROH7	-0.9571	1.84904	-5.96176	1.81358e-07	8.22144e-06	7.07869
MRM1	-0.304673	-0.188087	-5.95913	1.83148e-07	8.28372e-06	7.0693
LATS2	0.526053	-0.335695	5.95784	1.84026e-07	8.28941e-06	7.06472
GPR160	-0.598069	2.46654	-5.95772	1.84107e-07	8.28941e-06	7.0643
APPL2	-0.596438	1.08451	-5.95629	1.8509e-07	8.31484e-06	7.0592
PDGFRL	0.468858	-0.344562	5.95547	1.85658e-07	8.32156e-06	7.05627
MCRIP2	-0.41192	0.347956	-5.9507	1.88987e-07	8.45176e-06	7.03927
SMCO2	0.321851	-0.127102	5.94763	1.91159e-07	8.52973e-06	7.02833
ENSG00000225335	-0.700688	1.63658	-5.94496	1.93072e-07	8.59579e-06	7.01881
PCK1	-1.95237	2.15335	-5.94397	1.93785e-07	8.60829e-06	7.01528
CD82	0.742008	0.728404	5.94112	1.95855e-07	8.66369e-06	7.00511
FCGR3A	1.6085	3.4582	5.94105	1.95903e-07	8.66369e-06	7.00488
COL12A1	0.989557	-0.551142	5.94014	1.96569e-07	8.67388e-06	7.00163
ACADM	-0.738199	0.453105	-5.93889	1.97483e-07	8.69492e-06	6.99719
PLEKHG2	0.840613	-1.15176	5.93508	2.00306e-07	8.79978e-06	6.9836
WDR54	0.442278	-2.05877	5.93386	2.01215e-07	8.80938e-06	6.97928
GATD3A	-0.445075	0.477504	-5.9336	2.0141e-07	8.80938e-06	6.97835
KRCC1	-0.452305	2.13561	-5.93149	2.02999e-07	8.82839e-06	6.97083
TNFRSF10B	0.443478	-0.617637	5.9314	2.03067e-07	8.82839e-06	6.97051
SRD5A3	1.13438	0.789174	5.93084	2.03494e-07	8.82839e-06	6.9685
ZNF732	-0.307159	-0.242143	-5.93056	2.03704e-07	8.82839e-06	6.96751
SAMD9L	1.07963	1.7285	5.93009	2.04063e-07	8.82839e-06	6.96583
NNMT	1.56606	-1.81747	5.92715	2.06308e-07	8.90617e-06	6.95535
APOL1	1.0071	1.02786	5.92656	2.06764e-07	8.90653e-06	6.95324
RHBDF2	0.836238	-0.325057	5.92369	2.08979e-07	8.98247e-06	6.94305
ZNF442	-0.319433	0.55702	-5.92078	2.1126e-07	9.06097e-06	6.93266
PEX26	-0.51673	1.74527	-5.92007	2.11816e-07	9.06529e-06	6.93015
ARMC9	0.412959	-0.743888	5.91857	2.12998e-07	9.09628e-06	6.92482
SELP	1.17025	1.3148	5.91464	2.16137e-07	9.21059e-06	6.91082
FXYD5	0.506457	-0.893347	5.91371	2.16891e-07	9.22297e-06	6.90749
VPS37B	-0.357599	1.76166	-5.91245	2.17903e-07	9.2346e-06	6.90304
DNAJC10	0.562287	0.0226663	5.91203	2.18251e-07	9.2346e-06	6.90151
JSRP1	0.928823	-0.505504	5.91165	2.18557e-07	9.2346e-06	6.90017
ERLEC1	0.557655	0.47796	5.90923	2.20531e-07	9.29826e-06	6.89157
PLXND1	0.44965	-0.531875	5.9078	2.2171e-07	9.32824e-06	6.88647
NAAA	-0.957428	2.68494	-5.90681	2.22529e-07	9.33677e-06	6.88294
GLRX5	-0.32043	0.0868658	-5.90628	2.22969e-07	9.33677e-06	6.88105
PPP1R14C	-0.701706	2.16032	-5.90547	2.23639e-07	9.33677e-06	6.87818
RRAS2	-0.395028	-0.115714	-5.90529	2.2379e-07	9.33677e-06	6.87753
CHP2	-1.44786	6.94615	-5.90366	2.25149e-07	9.36173e-06	6.87174
PIP5K1B	-0.620328	3.65138	-5.90317	2.25558e-07	9.36173e-06	6.87
COL16A1	0.806558	0.0351287	5.90289	2.25799e-07	9.36173e-06	6.86898
CAVIN1	0.660947	-1.00721	5.8987	2.29341e-07	9.45915e-06	6.85409
BTN2A2	0.617942	-0.947642	5.89859	2.29439e-07	9.45915e-06	6.85368
SH3TC2	0.293949	0.05651	5.89788	2.30046e-07	9.45915e-06	6.85115
TRIM8	0.341767	0.61298	5.89781	2.30098e-07	9.45915e-06	6.85094
LUZP2	-0.875745	0.202549	-5.89679	2.30979e-07	9.45915e-06	6.84728
EVA1A	0.54672	-1.4537	5.8965	2.31223e-07	9.45915e-06	6.84627
LGALS1	0.92828	-1.98714	5.89621	2.31476e-07	9.45915e-06	6.84523
PPM1F	0.240246	-0.173274	5.89486	2.32643e-07	9.48736e-06	6.84042
SEMA5A	-0.590867	-0.20813	-5.89265	2.34559e-07	9.52803e-06	6.83257
DEGS1	0.583783	-1.03935	5.89261	2.34598e-07	9.52803e-06	6.83241
KLHL34	-0.956165	1.98161	-5.88401	2.42213e-07	9.81727e-06	6.80185
PTPN13	0.692648	-1.22845	5.88286	2.43258e-07	9.8396e-06	6.79773
RGS5	1.41314	2.23902	5.87958	2.46241e-07	9.94006e-06	6.78607
ATP5F1B	-0.524983	0.622323	-5.87887	2.46888e-07	9.94601e-06	6.78356
AP3S2	-0.5441	0.758849	-5.87674	2.48847e-07	1.00047e-05	6.776
SLCO1B3	1.30135	0.601874	5.87564	2.49874e-07	1.00257e-05	6.77206
ZNF219	-0.57985	0.906737	-5.87209	2.53192e-07	1.01384e-05	6.75944
MRAS	0.435879	-0.177219	5.87144	2.53796e-07	1.01421e-05	6.75716
CPEB3	-0.478808	1.1897	-5.8689	2.56207e-07	1.02085e-05	6.74812
MT-CO3	-0.76417	1.91014	-5.86852	2.56567e-07	1.02085e-05	6.74677
SLC22A18AS	-0.592797	2.74138	-5.86807	2.56994e-07	1.02085e-05	6.74518
PDSS2	-0.32198	0.833147	-5.86547	2.5949e-07	1.02871e-05	6.73594
PEX11A	-0.626759	1.05948	-5.86388	2.6103e-07	1.03275e-05	6.73028
BCAT2	-0.426027	0.211591	-5.86296	2.61928e-07	1.03425e-05	6.72699
RGS2	0.965405	1.364	5.86209	2.62768e-07	1.03551e-05	6.72393
CFAP36	0.424846	-0.571623	5.86133	2.63518e-07	1.03642e-05	6.7212
VIPR1	-0.954309	2.53957	-5.8603	2.64524e-07	1.03832e-05	6.71755
SNX7	-0.38127	1.52615	-5.85957	2.65239e-07	1.03908e-05	6.71498
RGCC	0.927041	1.52194	5.85736	2.67431e-07	1.04561e-05	6.7071
ZNF724	-0.38754	0.0730603	-5.85558	2.69203e-07	1.05047e-05	6.70078
RNF213	0.459174	0.188048	5.85403	2.70755e-07	1.05239e-05	6.69529
SAA2	1.80414	1.2854	5.85352	2.71269e-07	1.05239e-05	6.69347
DPF3	-0.501191	0.456753	-5.85351	2.7128e-07	1.05239e-05	6.69343
DCHS1	0.382474	0.0842098	5.85147	2.73341e-07	1.05832e-05	6.68619
TBXAS1	0.658783	1.31861	5.84891	2.75949e-07	1.06439e-05	6.67711
MRRFP1	-0.280995	0.49026	-5.84888	2.75979e-07	1.06439e-05	6.677
TPM4	0.845657	-0.793774	5.84814	2.76741e-07	1.06526e-05	6.67437
KCNN3	0.682508	0.014051	5.84553	2.79437e-07	1.07357e-05	6.66509
RIPK2	0.496848	-0.477642	5.83954	2.85726e-07	1.09154e-05	6.64381
SLC35F2	-0.464422	0.42186	-5.8392	2.86081e-07	1.09154e-05	6.64262
GUCY2C	-0.584173	3.9079	-5.83882	2.86485e-07	1.09154e-05	6.64127
MEST	-0.576414	-0.00888313	-5.83828	2.8706e-07	1.09154e-05	6.63935
FPR1	1.50898	1.30172	5.83732	2.88089e-07	1.09154e-05	6.63593
HINFP	-0.385496	0.0230716	-5.83716	2.88252e-07	1.09154e-05	6.63539
MRPL15	-0.345782	-0.339514	-5.83702	2.88412e-07	1.09154e-05	6.63486
MMP1	2.45699	-0.884119	5.83693	2.88503e-07	1.09154e-05	6.63455
CKMT1B	-0.239883	0.381841	-5.83494	2.90647e-07	1.09666e-05	6.62747
CLCN2	-1.07933	2.09285	-5.83465	2.90959e-07	1.09666e-05	6.62645
UQCRC2	-0.403637	0.928762	-5.82973	2.96322e-07	1.11466e-05	6.60898
ARHGEF3	0.590413	0.552775	5.82924	2.96853e-07	1.11466e-05	6.60726
ENSG00000255135	-0.462453	-0.215659	-5.82755	2.98723e-07	1.11931e-05	6.60126
RTEL1	1.24208	0.437954	5.82711	2.99217e-07	1.11931e-05	6.59968
OVOL1	-0.613003	3.01836	-5.82466	3.01947e-07	1.1274e-05	6.59099
CNPY2	0.351017	-0.469585	5.82366	3.03064e-07	1.12945e-05	6.58746
SAG	-0.514068	0.474732	-5.82181	3.05157e-07	1.13513e-05	6.58088
FADS3	0.339038	-0.628232	5.8209	3.06181e-07	1.13681e-05	6.57767
CHCHD10	-0.546373	1.67663	-5.81998	3.07228e-07	1.13857e-05	6.57441
DMAC2	-0.234075	0.16823	-5.8166	3.11104e-07	1.15079e-05	6.56242
EIF5A2	0.569419	-0.515711	5.81399	3.14139e-07	1.1579e-05	6.55313
SERPINA3	1.40513	-2.19817	5.81394	3.14188e-07	1.1579e-05	6.55298
FJX1	0.865522	-2.26153	5.81207	3.16377e-07	1.16381e-05	6.54634
ACAA1	-0.488126	1.58086	-5.80944	3.19476e-07	1.17304e-05	6.53702
EGFL7	0.804821	-1.66477	5.80864	3.20434e-07	1.1744e-05	6.53415
LRRC8E	0.576972	-0.126863	5.80759	3.21681e-07	1.1768e-05	6.53044
PCK2	-0.640744	0.705745	-5.80598	3.23608e-07	1.18167e-05	6.52473
CRIP2	0.629863	-0.703473	5.80288	3.27352e-07	1.19315e-05	6.51373
SH3BGRL2	-0.721895	3.1294	-5.8006	3.3012e-07	1.19952e-05	6.50568
PHLDA3	0.879881	-1.14485	5.80045	3.30305e-07	1.19952e-05	6.50514
HES5	-1.0356	2.79686	-5.79925	3.31778e-07	1.20082e-05	6.50088
HIVEP2	0.505647	0.0315854	5.79918	3.31868e-07	1.20082e-05	6.50063
PDLIM7	0.253529	-0.347153	5.798	3.33328e-07	1.20391e-05	6.49643
CD34	0.97546	2.17754	5.79547	3.36461e-07	1.21303e-05	6.48748
GUCA2B	-1.2652	3.51653	-5.79476	3.37346e-07	1.21402e-05	6.48497
C5orf30	-0.702208	1.56868	-5.79302	3.39529e-07	1.21959e-05	6.4788
INPP4A	0.300339	-0.0373624	5.79255	3.40119e-07	1.21959e-05	6.47714
VEGFC	0.941311	-2.51931	5.79164	3.41273e-07	1.22152e-05	6.4739
SRPRA	0.413533	0.0688487	5.78901	3.44612e-07	1.23126e-05	6.46459
KRT7	0.657248	-0.678178	5.78497	3.49817e-07	1.24762e-05	6.45025
MTDH	0.314075	0.302203	5.78272	3.52744e-07	1.25373e-05	6.44228
RILP	-0.420256	2.04337	-5.78229	3.533e-07	1.25373e-05	6.44078
PIM3	0.923792	0.858682	5.7822	3.53421e-07	1.25373e-05	6.44045
XK	-0.726189	2.23684	-5.78127	3.54641e-07	1.25582e-05	6.43716
C2orf88	-0.953917	2.3343	-5.77911	3.57492e-07	1.26178e-05	6.4295
CALM1	-0.335994	2.02671	-5.77856	3.58223e-07	1.26178e-05	6.42755
LINC01133	-0.844352	3.32083	-5.77856	3.58225e-07	1.26178e-05	6.42754
RPL27P10	-0.451266	0.383883	-5.77761	3.59486e-07	1.26398e-05	6.42418
UGT2A3	-1.04855	0.903613	-5.77626	3.61281e-07	1.26805e-05	6.41942
SP140	0.591745	0.984208	5.77561	3.6216e-07	1.2689e-05	6.41709
PPM1A	-0.428961	0.683304	-5.77467	3.63423e-07	1.27109e-05	6.41376
ME1	0.945493	0.149483	5.7726	3.6622e-07	1.27862e-05	6.40643
CCDC112	-0.412757	0.575419	-5.77212	3.66873e-07	1.27866e-05	6.40473
AGPAT4	0.874653	-0.0198912	5.76918	3.70889e-07	1.29039e-05	6.39432
PRDX6	-0.948509	0.224626	-5.76265	3.79964e-07	1.3182e-05	6.3712
CITED4	0.263008	-0.83161	5.76216	3.80649e-07	1.3182e-05	6.36948
SLFN5	0.710394	-0.101114	5.76159	3.81456e-07	1.3182e-05	6.36746
COL1A2	0.882558	-0.175806	5.76117	3.82057e-07	1.3182e-05	6.36595
SEPHS2	-0.665169	0.515158	-5.76107	3.82193e-07	1.3182e-05	6.36561
CCN4	0.881263	0.460534	5.75948	3.84453e-07	1.3237e-05	6.35997
MRPL35	-0.393393	0.834417	-5.75854	3.85789e-07	1.32601e-05	6.35666
LOC729603	-0.30727	0.277292	-5.75686	3.88192e-07	1.33197e-05	6.35072
MAP3K5	0.50002	1.8665	5.75574	3.89804e-07	1.33262e-05	6.34676
TCN1	1.85136	0.814383	5.75512	3.90702e-07	1.33262e-05	6.34456
INHBA	0.701976	-0.9683	5.75474	3.9126e-07	1.33262e-05	6.34319
STARD8	0.503278	-0.579038	5.75397	3.92366e-07	1.33262e-05	6.34049
OLFML2B	0.403793	0.501236	5.75383	3.92574e-07	1.33262e-05	6.33999
MRPS33	-0.410848	0.409215	-5.75374	3.92698e-07	1.33262e-05	6.33968
TP53TG1	-0.689863	1.16122	-5.75263	3.94323e-07	1.33262e-05	6.33573
PLA2G12A	-0.380067	0.451447	-5.75254	3.94457e-07	1.33262e-05	6.33541
CAVIN3	0.80106	-0.26737	5.75221	3.94929e-07	1.33262e-05	6.33427
VAMP5	0.760437	0.531964	5.75211	3.95079e-07	1.33262e-05	6.3339
ADA	0.982404	-3.2567	5.74827	4.00736e-07	1.34942e-05	6.32031
SPOCD1	0.40031	-0.9488	5.74495	4.05688e-07	1.36378e-05	6.30857
ADAMTS9	0.291098	0.0850118	5.73958	4.13836e-07	1.38883e-05	6.28955
KRT6B	1.71784	1.26888	5.73664	4.18353e-07	1.40162e-05	6.27918
GLT8D1	0.297035	-0.438812	5.73274	4.24439e-07	1.41962e-05	6.26537
DNAJC25	-0.36463	0.360637	-5.72927	4.2992e-07	1.43554e-05	6.2531
FOXD2	-0.762934	2.89383	-5.72819	4.31635e-07	1.43886e-05	6.24929
CHST3	0.354595	-0.450911	5.72749	4.32762e-07	1.4402e-05	6.2468
KLK12	1.68795	2.54052	5.72652	4.34314e-07	1.44295e-05	6.24338
PHYH	-0.678478	1.14403	-5.72571	4.35618e-07	1.44487e-05	6.24051
ABI2	0.28467	-1.3975	5.72489	4.36933e-07	1.44521e-05	6.23763
RAI1	0.266113	-0.528764	5.72463	4.37355e-07	1.44521e-05	6.23671
SPHK2	-0.62142	1.34562	-5.72389	4.38548e-07	1.44521e-05	6.2341
PARVB	0.444576	-1.29375	5.72385	4.38623e-07	1.44521e-05	6.23394
ANO10	-0.5163	0.569075	-5.72287	4.40206e-07	1.44802e-05	6.2305
KYNU	1.15239	-1.88433	5.71643	4.50811e-07	1.47778e-05	6.20774
LHX6	0.547373	-0.469021	5.71621	4.51178e-07	1.47778e-05	6.20696
TACO1	-0.320936	0.396298	-5.71603	4.51481e-07	1.47778e-05	6.20632
AP1AR	-0.415436	0.87163	-5.71556	4.52268e-07	1.47793e-05	6.20465
NDUFB7	-0.313149	0.776542	-5.71339	4.55905e-07	1.48737e-05	6.197
ATP5F1D	-0.388017	0.850123	-5.71223	4.57865e-07	1.49132e-05	6.1929
PRDX4	0.789843	-0.970053	5.71145	4.592e-07	1.49272e-05	6.19011
SHANK3	0.734297	-0.0961904	5.7111	4.59796e-07	1.49272e-05	6.18887
ATP6V1F	0.36882	-0.64953	5.71025	4.61239e-07	1.49497e-05	6.18588
TMEM238	-0.382395	2.4523	-5.70816	4.64813e-07	1.5041e-05	6.1785
NXPE2	-0.822998	1.98447	-5.70694	4.66917e-07	1.50846e-05	6.17418
CD276	0.302933	-0.0593757	5.70477	4.70673e-07	1.51813e-05	6.16652
TWSG1	0.445115	0.0946051	5.70333	4.73184e-07	1.52376e-05	6.16143
PIK3R3	0.330051	0.0680187	5.70157	4.7626e-07	1.53119e-05	6.15524
CD40	0.718096	0.746592	5.70092	4.77405e-07	1.53239e-05	6.15295
SLC17A4	-0.895013	2.1703	-5.69899	4.80823e-07	1.54088e-05	6.14613
CPXM1	0.682009	-0.7479	5.69757	4.83355e-07	1.5465e-05	6.1411
IFITM2	1.04162	0.21945	5.69082	4.95559e-07	1.58301e-05	6.11727
KLK10	1.80677	1.054	5.6841	5.08015e-07	1.62019e-05	6.09354
CXCL3	1.68142	1.46098	5.67933	5.17027e-07	1.6463e-05	6.07673
UQCR10	-0.398627	1.4139	-5.67865	5.18343e-07	1.64785e-05	6.0743
NDUFV1	-0.430698	0.280397	-5.67801	5.19552e-07	1.64906e-05	6.07208
FAM89A	0.559093	-1.01902	5.67618	5.23078e-07	1.65754e-05	6.06561
ASCC3	0.455718	-0.317744	5.67576	5.23889e-07	1.65754e-05	6.06413
SLC19A3	-0.474427	0.429284	-5.67451	5.2632e-07	1.66251e-05	6.0597
NDUFB9	-0.376247	0.532753	-5.67409	5.27131e-07	1.66251e-05	6.05823
CCNJL	-0.594643	0.721028	-5.67361	5.28069e-07	1.66283e-05	6.05653
CTDSPL	-0.575466	1.0224	-5.67267	5.29899e-07	1.66374e-05	6.05323
CHPT1	-0.691103	0.806476	-5.67215	5.30915e-07	1.66374e-05	6.0514
ITGA5	0.514163	-1.55138	5.67204	5.3113e-07	1.66374e-05	6.05101
TMEM251	-0.372569	0.97705	-5.67175	5.317e-07	1.66374e-05	6.04998
ECSCR	1.03105	1.76832	5.67038	5.34406e-07	1.66958e-05	6.04513
KCNJ8	0.688602	-0.58885	5.66767	5.39771e-07	1.68131e-05	6.03558
C1orf167	0.628215	0.511157	5.66763	5.39851e-07	1.68131e-05	6.03544
EPHX2	-0.791854	2.71246	-5.66381	5.47504e-07	1.70248e-05	6.02199
CNN2	0.533411	-0.285938	5.66083	5.53572e-07	1.71867e-05	6.01145
F2RL2	0.316465	-0.349379	5.66011	5.55045e-07	1.72055e-05	6.00892
CDKN2B	-0.953938	2.06019	-5.65682	5.61807e-07	1.73865e-05	5.99734
HTRA3	0.740231	0.0348028	5.65643	5.6263e-07	1.73865e-05	5.99594
CASP5	0.870848	1.58715	5.65401	5.67673e-07	1.75151e-05	5.98741
CHSY1	0.688378	-1.34476	5.65045	5.75166e-07	1.77189e-05	5.97488
SLC43A3	0.335827	-1.25194	5.64742	5.81623e-07	1.78901e-05	5.96421
EDN3	-1.03394	3.43353	-5.64612	5.84432e-07	1.79181e-05	5.95961
TKT	0.394775	-1.28804	5.64594	5.84807e-07	1.79181e-05	5.959
SLC16A1	-1.29431	-0.682321	-5.64574	5.85236e-07	1.79181e-05	5.9583
THBD	1.0832	0.816653	5.6447	5.87484e-07	1.79593e-05	5.95463
CNTNAP2	-0.156195	0.00224166	-5.64116	5.95217e-07	1.81678e-05	5.94213
HSD17B11	-0.823744	2.08	-5.64	5.97753e-07	1.82049e-05	5.93807
NFE2	0.963403	-4.1093	5.63963	5.98567e-07	1.82049e-05	5.93677
COX20	-0.183754	0.0825083	-5.63915	5.99642e-07	1.82049e-05	5.93506
MOCS1	-0.437129	0.175321	-5.63894	6.0009e-07	1.82049e-05	5.93434
CASP1	1.10643	3.28381	5.63821	6.01726e-07	1.82267e-05	5.93174
FSIP1	-0.779445	0.984069	-5.63773	6.02788e-07	1.82311e-05	5.93006
CA12	-0.781954	2.88413	-5.63673	6.05018e-07	1.82621e-05	5.92653
LETM1	-0.493231	0.378045	-5.63623	6.06129e-07	1.82621e-05	5.92477
FAM215A	-0.50767	1.02714	-5.63603	6.06566e-07	1.82621e-05	5.92408
CLEC14A	0.877345	2.38478	5.63414	6.10805e-07	1.8362e-05	5.91743
CYP2J2	-0.551525	3.85443	-5.63326	6.12799e-07	1.83941e-05	5.91432
RAB8B	0.645299	-0.00827384	5.63229	6.14991e-07	1.84321e-05	5.9109
EIF4EBP2	-0.576117	1.10923	-5.63113	6.17613e-07	1.84829e-05	5.90684
INHBB	0.692302	-0.757074	5.62787	6.25077e-07	1.86782e-05	5.89536
TDRD3	-0.223497	-0.031553	-5.62743	6.26103e-07	1.86808e-05	5.89379
KCNE2	-0.894277	0.613386	-5.62609	6.2921e-07	1.87225e-05	5.88906
ETHE1	-0.558741	3.93176	-5.62592	6.29592e-07	1.87225e-05	5.88848
VIL1	-0.746149	3.21569	-5.62532	6.30984e-07	1.87225e-05	5.88637
FCN3	0.982647	0.753867	5.6252	6.31265e-07	1.87225e-05	5.88594
MSANTD3	0.366675	-1.30477	5.62225	6.38158e-07	1.88988e-05	5.87557
SEC31A	0.249218	0.187722	5.62164	6.39593e-07	1.89131e-05	5.87342
ZC3H12A	1.30927	2.25496	5.61893	6.4601e-07	1.90702e-05	5.86388
ZNF254	-0.316708	-0.129044	-5.61844	6.47192e-07	1.90702e-05	5.86214
NAPEPLD	-0.507415	1.36353	-5.61819	6.47778e-07	1.90702e-05	5.86127
RGS16	1.00608	-0.5029	5.61493	6.55611e-07	1.92723e-05	5.84978
SLC25A29	0.533469	-0.817125	5.61447	6.5671e-07	1.92761e-05	5.84818
CELA3A	-1.01306	-0.04066	-5.61318	6.59827e-07	1.93391e-05	5.84366
SAA1	2.44464	1.92458	5.61114	6.64813e-07	1.94565e-05	5.83647
SCUBE2	-0.910312	-0.292	-5.60968	6.68401e-07	1.95328e-05	5.83132
TCIRG1	0.58137	1.15953	5.60743	6.73958e-07	1.96408e-05	5.82341
NXPE3	0.749748	-0.0552021	5.60715	6.74645e-07	1.96408e-05	5.82244
DNMBP	-0.549454	1.28195	-5.60699	6.75058e-07	1.96408e-05	5.82185
NAP1L5	0.235537	-0.320242	5.60566	6.7836e-07	1.97081e-05	5.81719
UGDH	-0.694432	0.763147	-5.60517	6.79574e-07	1.97146e-05	5.81548
SEMA6D	-0.509467	1.35492	-5.60347	6.83841e-07	1.97935e-05	5.8095
SLC20A2	-0.793922	1.41135	-5.60279	6.85565e-07	1.97935e-05	5.8071
GRTP1	-0.576102	1.72627	-5.60265	6.85906e-07	1.97935e-05	5.80662
CPT1A	-0.584309	1.15044	-5.60251	6.86271e-07	1.97935e-05	5.80611
MLYCD	-0.3332	1.2746	-5.59746	6.99157e-07	2.01359e-05	5.78834
GRAMD1C	-0.62152	1.71312	-5.59683	7.00774e-07	2.01533e-05	5.78613
ME2	-0.466983	0.900814	-5.59599	7.02941e-07	2.01865e-05	5.78318
IGFBP7	1.2561	0.332973	5.59081	7.1647e-07	2.05454e-05	5.76497
COL5A2	0.847153	0.0560231	5.58679	7.27132e-07	2.07624e-05	5.75086
GRINA	0.412117	-0.363414	5.58672	7.27315e-07	2.07624e-05	5.75062
PGM2L1	0.459441	0.74335	5.58643	7.28088e-07	2.07624e-05	5.7496
MZB1	1.53236	-0.643561	5.58639	7.28211e-07	2.07624e-05	5.74944
TG	0.611402	0.727507	5.58438	7.33614e-07	2.08848e-05	5.74238
HSPA12B	0.781042	1.30317	5.58384	7.35064e-07	2.08848e-05	5.74049
BLOC1S5-TXNDC5	0.802181	-0.0933855	5.58359	7.35738e-07	2.08848e-05	5.73962
AMT	-0.52741	0.750482	-5.58294	7.37505e-07	2.08848e-05	5.73732
MSN	0.380809	-0.685857	5.58285	7.37753e-07	2.08848e-05	5.737
MAPK11	0.774296	-1.00116	5.58237	7.39055e-07	2.08919e-05	5.73532
PPA1	0.538548	0.386793	5.5808	7.43343e-07	2.09538e-05	5.72979
LZTS1	0.79798	-3.14648	5.58079	7.43348e-07	2.09538e-05	5.72979
CCDC127	0.313809	-0.239197	5.58041	7.44411e-07	2.09541e-05	5.72842
SHROOM1	-0.517549	1.13985	-5.57994	7.45679e-07	2.09601e-05	5.72679
CAAP1	-0.387757	1.00316	-5.57673	7.5453e-07	2.1179e-05	5.71552
PLCD1	-0.788161	1.80191	-5.57633	7.55657e-07	2.11808e-05	5.71409
HOXA5	-0.846577	1.18741	-5.57434	7.61201e-07	2.13061e-05	5.70711
ARMCX6	0.303099	-0.344931	5.57183	7.68254e-07	2.14733e-05	5.6983
PARS2	-0.344241	0.326988	-5.5697	7.74293e-07	2.15275e-05	5.69082
AJUBA	0.567079	-2.87065	5.56965	7.74428e-07	2.15275e-05	5.69065
KRT6A	0.910248	0.505346	5.56914	7.75901e-07	2.15275e-05	5.68884
STEAP2	-0.409204	1.65536	-5.56897	7.76375e-07	2.15275e-05	5.68825
TRIB2	0.583335	-1.52168	5.56894	7.76471e-07	2.15275e-05	5.68814
PLEKHJ1	-0.435582	1.24816	-5.56886	7.76683e-07	2.15275e-05	5.68788
FAM110D	0.687149	1.33112	5.56677	7.82667e-07	2.16577e-05	5.68054
ABCC1	0.346876	-0.890465	5.56646	7.83557e-07	2.16577e-05	5.67946
COX7B	-0.383969	0.784317	-5.56601	7.84869e-07	2.16639e-05	5.67786
RDH11	0.579554	-0.839561	5.56512	7.87439e-07	2.17047e-05	5.67474
SULF1	1.10327	0.633891	5.56285	7.94048e-07	2.18567e-05	5.66675
PGGT1B	-0.291533	1.17051	-5.56152	7.97938e-07	2.19334e-05	5.66208
NBPF1	-0.454568	0.102191	-5.56097	7.99544e-07	2.19472e-05	5.66016
C11orf96	1.3498	1.79092	5.55904	8.05231e-07	2.20522e-05	5.65339
IL1B	1.9191	2.53886	5.55892	8.05586e-07	2.20522e-05	5.65297
ZNF575	-0.662341	1.80309	-5.55838	8.07195e-07	2.20659e-05	5.65107
ADGRA3	-0.532295	0.557977	-5.55791	8.08578e-07	2.20734e-05	5.64943
AQP9	1.70361	1.20166	5.55458	8.18527e-07	2.23144e-05	5.63775
GGH	-0.628803	0.284248	-5.55337	8.22173e-07	2.23831e-05	5.6335
RAB3IP	-0.275825	0.308204	-5.55208	8.26098e-07	2.24593e-05	5.62896
KIAA0930	0.385933	0.0395295	5.54964	8.33515e-07	2.263e-05	5.62042
SEC24D	0.394992	0.360396	5.54718	8.41079e-07	2.28042e-05	5.61179
DIPK1B	0.466995	-1.90835	5.54648	8.4326e-07	2.28323e-05	5.60931
SAMD14	0.421179	0.102412	5.54519	8.47248e-07	2.29091e-05	5.60481
TUBB6	0.534991	-1.56864	5.5438	8.51579e-07	2.2995e-05	5.59994
COX4I1	-0.410959	1.09295	-5.543	8.54108e-07	2.3032e-05	5.59711
ZNF518A	-0.306553	0.438388	-5.54169	8.58224e-07	2.31117e-05	5.59251
ST3GAL5	0.475097	-0.603854	5.54078	8.61088e-07	2.312e-05	5.58933
CISD1	-0.328242	0.523185	-5.54069	8.61363e-07	2.312e-05	5.58903
UBE2H	0.446004	0.0121375	5.54048	8.6202e-07	2.312e-05	5.5883
BST2	0.321946	-0.654296	5.53932	8.65724e-07	2.31881e-05	5.5842
ABCB6	0.458308	-1.75514	5.53781	8.70528e-07	2.32854e-05	5.57892
ABCB10	-0.219131	-0.000261202	-5.53651	8.74683e-07	2.33652e-05	5.57437
CEP164	0.233889	-0.35324	5.53577	8.77063e-07	2.33974e-05	5.57177
TMEM80	-0.432738	0.793845	-5.53526	8.78703e-07	2.34097e-05	5.56999
PJA1	0.551124	-0.349706	5.53437	8.81593e-07	2.34488e-05	5.56685
TPTEP2-CSNK1E	0.451725	-1.31398	5.53408	8.82526e-07	2.34488e-05	5.56584
FABP1	-1.43635	6.40144	-5.5303	8.94844e-07	2.37284e-05	5.55261
GALNT12	-0.786875	2.57173	-5.53012	8.95434e-07	2.37284e-05	5.55198
KLF7	0.356696	-0.10713	5.52817	9.01867e-07	2.38671e-05	5.54514
IP6K2	-0.573482	0.39426	-5.52763	9.03663e-07	2.38829e-05	5.54324
PPM1K	0.341394	-0.0833917	5.52721	9.05041e-07	2.38876e-05	5.54178
VCAN	0.768378	-1.28618	5.52196	9.22651e-07	2.43201e-05	5.52338
ISX	-0.841933	5.07085	-5.51963	9.3056e-07	2.44961e-05	5.51523
SYTL1	0.809633	0.390976	5.51805	9.35992e-07	2.46066e-05	5.50967
FAM241B	0.403667	-0.535496	5.51755	9.37695e-07	2.46188e-05	5.50793
HIGD1A	-0.752719	2.67382	-5.51614	9.4255e-07	2.47137e-05	5.503
CHI3L1	1.16618	0.392539	5.51559	9.44466e-07	2.47313e-05	5.50106
ELOVL5	0.322678	-1.06679	5.51423	9.49181e-07	2.48222e-05	5.4963
PTAFR	0.761324	1.48155	5.51304	9.53346e-07	2.48852e-05	5.49212
PHF21A	0.268263	-0.311864	5.51283	9.54093e-07	2.48852e-05	5.49138
JCAD	0.513738	-0.142459	5.51201	9.56957e-07	2.49272e-05	5.48851
FAM47E	-0.636921	1.57123	-5.51014	9.63543e-07	2.5066e-05	5.48196
ZNF492	-0.23607	-0.383586	-5.50784	9.71702e-07	2.52048e-05	5.47391
STX2	0.585286	-1.46814	5.50759	9.72573e-07	2.52048e-05	5.47306
HSBP1L1	-0.534052	1.60906	-5.50756	9.72678e-07	2.52048e-05	5.47295
SSR4	0.746579	0.454431	5.50687	9.75163e-07	2.52363e-05	5.47052
FAM189A1	-1.22863	1.59538	-5.50521	9.8112e-07	2.53575e-05	5.4647
LOX	0.486151	-1.39078	5.50433	9.84258e-07	2.54056e-05	5.46165
RMI1	-0.34971	-0.366129	-5.50333	9.87895e-07	2.54665e-05	5.45813
PWWP2A	-0.254532	0.485909	-5.50055	9.98025e-07	2.56943e-05	5.44839
PGAP2	-0.328514	0.514246	-5.49811	1.00695e-06	2.58907e-05	5.43988
ATP5MC3	-0.477776	0.895758	-5.49741	1.00957e-06	2.59208e-05	5.43741
ANO6	0.371405	-0.634865	5.49709	1.01073e-06	2.59208e-05	5.43631
HOXA2	-0.468645	0.812626	-5.49645	1.0131e-06	2.59482e-05	5.43407
CEBPA	-0.469406	2.35256	-5.49598	1.01485e-06	2.59594e-05	5.43243
FLJ32255	0.525549	0.463983	5.48848	1.04312e-06	2.66484e-05	5.40619
ROPN1L	0.316391	-0.342896	5.48665	1.05014e-06	2.6767e-05	5.39978
SEC14L2	0.345879	-0.302915	5.48657	1.05045e-06	2.6767e-05	5.3995
RASA4	0.523734	0.653916	5.48543	1.05487e-06	2.68452e-05	5.39549
VNN1	1.53959	1.2164	5.48267	1.06558e-06	2.70831e-05	5.38585
SLC22A15	0.560105	0.514583	5.48176	1.06912e-06	2.71384e-05	5.38268
NDUFAB1	-0.305166	-0.202834	-5.47632	1.09065e-06	2.76498e-05	5.36364
LAMA4	0.415797	-0.167495	5.47562	1.09345e-06	2.76592e-05	5.36119
OTOP2	-0.429487	0.44498	-5.47553	1.0938e-06	2.76592e-05	5.36089
LYPD8	-1.06726	4.93575	-5.47377	1.10086e-06	2.78024e-05	5.35474
DGLUCY	-0.216681	0.943582	-5.47265	1.10539e-06	2.78812e-05	5.35083
FAM124B	0.373535	-0.171533	5.46938	1.11868e-06	2.81591e-05	5.33941
LAMB1	0.597439	-0.798352	5.46925	1.11923e-06	2.81591e-05	5.33894
CSGALNACT1	0.478689	-0.819414	5.46887	1.12077e-06	2.81622e-05	5.33763
COL6A1	0.581884	-0.421573	5.46833	1.123e-06	2.81826e-05	5.33574
SOD3	0.707325	1.55851	5.46686	1.12905e-06	2.82988e-05	5.3306
SLC17A8	-0.528964	0.643435	-5.46613	1.13208e-06	2.83391e-05	5.32804
DYRK2	-0.570264	2.15136	-5.46279	1.14602e-06	2.8652e-05	5.31636
CD55	1.26147	-0.410628	5.46208	1.14897e-06	2.86897e-05	5.31391
ADGRL4	0.741958	1.01654	5.45993	1.15807e-06	2.88807e-05	5.30637
TONSL	-0.806103	2.81009	-5.4588	1.16288e-06	2.89642e-05	5.30242
IRAK3	0.711232	1.05638	5.45697	1.17067e-06	2.91219e-05	5.29604
SMAD7	-0.426748	0.751966	-5.45498	1.17924e-06	2.92985e-05	5.28908
TMCC3	-0.765258	2.36115	-5.45192	1.19249e-06	2.95908e-05	5.27841
NAALADL1	-0.691891	0.771826	-5.45102	1.19642e-06	2.96514e-05	5.27527
IL33	1.11921	2.1565	5.4468	1.21504e-06	3.00753e-05	5.26053
DYRK3	0.410564	-1.16862	5.44321	1.23106e-06	3.0434e-05	5.24803
TMTC1	0.710972	-0.630202	5.44211	1.23605e-06	3.05193e-05	5.24417
PTPN21	-0.364747	0.796176	-5.44015	1.24494e-06	3.07008e-05	5.23732
OSMR	0.345365	-0.722597	5.4397	1.24697e-06	3.07128e-05	5.23577
CNGA1	-0.634558	0.873583	-5.4379	1.25523e-06	3.08781e-05	5.22947
MMP3	2.55826	0.476297	5.43369	1.27467e-06	3.12856e-05	5.21479
CDC25B	0.572401	-0.934286	5.43345	1.2758e-06	3.12856e-05	5.21395
COL15A1	0.738442	-0.0156933	5.43329	1.27651e-06	3.12856e-05	5.21342
HSD11B2	-0.711301	4.98731	-5.43269	1.27933e-06	3.13123e-05	5.21131
NT5DC2	0.629282	-2.13031	5.43239	1.28075e-06	3.13123e-05	5.21025
PSD3	-0.454239	0.123775	-5.42868	1.2982e-06	3.16322e-05	5.19734
TMEM258	0.316338	0.12123	5.42837	1.29969e-06	3.16322e-05	5.19624
S100A8	2.52657	3.18526	5.42836	1.29972e-06	3.16322e-05	5.19622
PPARA	-0.327685	0.936166	-5.42825	1.30028e-06	3.16322e-05	5.19581
CCL26	0.357958	-0.235081	5.42793	1.30178e-06	3.16322e-05	5.19471
GPR4	0.701907	0.644273	5.42453	1.31804e-06	3.19681e-05	5.18286
ATP6V1E2	0.442132	-1.04877	5.42437	1.31882e-06	3.19681e-05	5.18229
ATP2B4	0.269073	-0.644092	5.42387	1.32124e-06	3.19879e-05	5.18054
SSR3	0.373901	-0.425258	5.42308	1.32504e-06	3.20133e-05	5.1778
MXI1	-0.809613	0.942051	-5.42299	1.32551e-06	3.20133e-05	5.17747
SLC16A2	0.51794	-0.146683	5.42167	1.33189e-06	3.21285e-05	5.17288
PECAM1	0.867337	2.72307	5.42129	1.33373e-06	3.2134e-05	5.17156
AUH	-0.618416	1.08013	-5.42035	1.33831e-06	3.21526e-05	5.16829
GLCCI1	0.818338	-0.672304	5.42025	1.33882e-06	3.21526e-05	5.16793
SULF2	0.619613	0.485427	5.42013	1.33939e-06	3.21526e-05	5.16752
SLC35G2	0.425002	-1.45689	5.41942	1.34287e-06	3.21526e-05	5.16504
ZNF350	-0.534056	1.18808	-5.41922	1.34384e-06	3.21526e-05	5.16436
TTPA	-0.213563	0.223163	-5.41915	1.3442e-06	3.21526e-05	5.1641
TNS1	0.197561	-0.20837	5.41859	1.34695e-06	3.21797e-05	5.16215
HEG1	0.557902	-0.564926	5.41588	1.36033e-06	3.24604e-05	5.15271
DCPS	0.613027	-0.633814	5.41414	1.369e-06	3.26282e-05	5.14665
ULK3	-0.439437	0.424552	-5.41111	1.38423e-06	3.29515e-05	5.1361
ANK3	-0.82308	1.34214	-5.40813	1.3994e-06	3.32619e-05	5.12569
MNX1-AS1	-0.814423	-1.10285	-5.40789	1.40061e-06	3.32619e-05	5.12487
CAMK2G	-0.320276	0.534128	-5.40677	1.40636e-06	3.33588e-05	5.12095
TMEM255B	0.242764	0.0384043	5.40601	1.41026e-06	3.34114e-05	5.11831
S100A3	0.488007	-0.182214	5.40562	1.41229e-06	3.34196e-05	5.11694
LOXL1	1.0951	-2.76464	5.40354	1.42301e-06	3.36007e-05	5.10972
ROBO1	0.408166	-0.621217	5.40348	1.42332e-06	3.36007e-05	5.10952
TMEM98	-0.646065	1.68389	-5.40006	1.44122e-06	3.3957e-05	5.09759
GON7	-0.431819	1.20016	-5.39979	1.44262e-06	3.3957e-05	5.09666
DIPK2B	0.20412	0.220793	5.39934	1.44502e-06	3.3957e-05	5.09507
TRAK2	-0.416192	1.06217	-5.39929	1.44526e-06	3.3957e-05	5.09492
APOBEC3B	-0.995261	-0.0854776	-5.39897	1.44694e-06	3.3957e-05	5.09381
GCNT2	-0.528938	0.057758	-5.39714	1.45666e-06	3.41448e-05	5.08742
CLDN1	0.537369	-0.208674	5.39441	1.4712e-06	3.44452e-05	5.07794
ZNF799	-0.233436	0.356068	-5.39182	1.48519e-06	3.47319e-05	5.06891
MGAT4B	-0.610848	1.29063	-5.39063	1.49164e-06	3.48417e-05	5.06477
ZNF3	-0.249716	-0.234122	-5.38994	1.49538e-06	3.48882e-05	5.06238
ITGA6	0.503123	2.29314	5.38863	1.50255e-06	3.49868e-05	5.05782
MED9	-0.24219	-0.222917	-5.38853	1.50313e-06	3.49868e-05	5.05745
FBXO6	0.567998	0.952883	5.38733	1.50971e-06	3.50732e-05	5.05328
ISG20	0.836151	1.94917	5.38721	1.51036e-06	3.50732e-05	5.05287
FOXC1	0.423578	-2.26525	5.38551	1.51976e-06	3.52503e-05	5.04695
FAAH	-0.515801	1.27889	-5.38477	1.52385e-06	3.53039e-05	5.04439
RNF138	-0.438089	0.424635	-5.38344	1.53125e-06	3.54342e-05	5.03976
SLC38A4	-0.888824	0.430608	-5.38025	1.54921e-06	3.58081e-05	5.02864
SUPV3L1	-0.293843	-0.2185	-5.37886	1.55706e-06	3.59479e-05	5.02381
ALDH5A1	-0.247687	-0.134664	-5.37604	1.57313e-06	3.62767e-05	5.01402
FRY	0.417891	0.801414	5.37315	1.58978e-06	3.66182e-05	5.00397
ART3	0.877966	0.170651	5.37133	1.60035e-06	3.68191e-05	4.99765
TRIB1	0.51098	0.910213	5.37076	1.60367e-06	3.68238e-05	4.99567
MIGA2	-0.359558	0.508209	-5.37066	1.60425e-06	3.68238e-05	4.99532
TST	-0.599047	3.75828	-5.36759	1.62235e-06	3.71962e-05	4.98462
C3orf85	-0.876378	2.81628	-5.36364	1.64581e-06	3.76908e-05	4.97092
FAM92A	0.499506	-0.960749	5.36263	1.65192e-06	3.77872e-05	4.96739
ANKH	-0.606355	0.353657	-5.36097	1.66191e-06	3.7972e-05	4.96163
ZNF592	-0.229041	0.229643	-5.36053	1.66456e-06	3.79768e-05	4.96011
ZSWIM5	-0.499373	0.532745	-5.36031	1.66593e-06	3.79768e-05	4.95933
SPP1	1.31019	-4.07251	5.35854	1.67669e-06	3.81783e-05	4.95319
IMPDH1	0.307802	-0.517023	5.35715	1.68518e-06	3.83278e-05	4.94836
TMEM192	-0.437865	0.395786	-5.35665	1.68824e-06	3.83535e-05	4.94664
SLC25A5	-0.509283	0.985376	-5.35618	1.69115e-06	3.83758e-05	4.94499
TRPV1	-0.468166	0.0945876	-5.35573	1.69391e-06	3.83946e-05	4.94344
MPP7	-0.545231	0.99929	-5.35455	1.7012e-06	3.8516e-05	4.93934
ACO2	-0.450643	1.36822	-5.35371	1.70646e-06	3.85911e-05	4.9364
TXNDC15	0.690585	0.432745	5.35218	1.71598e-06	3.87624e-05	4.93109
FUT8-AS1	0.35606	0.343209	5.35159	1.71965e-06	3.88012e-05	4.92905
PTRH1	0.453018	-0.0898938	5.35124	1.72183e-06	3.88065e-05	4.92784
ZNF85	-0.400101	-0.249431	-5.34932	1.73391e-06	3.90346e-05	4.92117
TNFAIP1	0.341291	0.25839	5.34891	1.73649e-06	3.90485e-05	4.91975
AHR	0.51952	0.114578	5.34808	1.74178e-06	3.91233e-05	4.91685
LPGAT1	0.550591	0.212865	5.34711	1.74793e-06	3.91712e-05	4.91349
SLC25A23	-0.727754	0.999811	-5.34691	1.74922e-06	3.91712e-05	4.91279
LMAN1	0.675365	-0.0530823	5.34681	1.74982e-06	3.91712e-05	4.91246
FAM120AOS	-0.315691	0.776136	-5.34548	1.75832e-06	3.93171e-05	4.90784
HSPB3	-1.54572	0.256382	-5.34425	1.7662e-06	3.9449e-05	4.90357
TPRN	-0.581585	1.51288	-5.34323	1.7728e-06	3.95521e-05	4.90001
BACE1	0.670328	-0.984428	5.34268	1.77631e-06	3.9586e-05	4.89812
CD99L2	0.22742	-0.348468	5.34096	1.78749e-06	3.97775e-05	4.89214
SPHAR	-0.377642	0.97255	-5.3406	1.78984e-06	3.97775e-05	4.89088
PRPF38A	-0.207821	-0.174022	-5.34043	1.7909e-06	3.97775e-05	4.89032
PAG1	-0.929958	2.81482	-5.33986	1.79464e-06	3.98162e-05	4.88833
UBTD1	0.420607	-0.599773	5.33675	1.81507e-06	4.02246e-05	4.87753
RASGRF2	0.273948	-0.170402	5.33318	1.83881e-06	4.07054e-05	4.86513
CRELD2	0.850281	1.13889	5.33235	1.84432e-06	4.07819e-05	4.86228
IL6R	-0.534285	2.01885	-5.33046	1.85707e-06	4.10032e-05	4.85571
MRPL34	-0.428005	0.178206	-5.33026	1.85844e-06	4.10032e-05	4.855
EBF3	0.35344	0.211756	5.32982	1.86136e-06	4.1022e-05	4.85351
STRBP	-0.294116	-0.15006	-5.32717	1.87938e-06	4.12827e-05	4.84432
OSM	1.41965	1.28176	5.32705	1.88022e-06	4.12827e-05	4.84389
CTSK	1.24072	2.12903	5.32703	1.88035e-06	4.12827e-05	4.84383
EDEM1	0.561608	0.670848	5.32687	1.88149e-06	4.12827e-05	4.84325
ACSS2	-0.580433	1.49999	-5.32641	1.88464e-06	4.13064e-05	4.84165
CKMT2	-0.247066	0.232487	-5.32417	1.9e-06	4.15332e-05	4.83391
C11orf54	-0.585334	1.23108	-5.32409	1.90058e-06	4.15332e-05	4.83362
LINC01146	1.02126	0.868395	5.32399	1.90125e-06	4.15332e-05	4.83328
MTRNR2L10	-0.657059	3.01995	-5.32322	1.90657e-06	4.16038e-05	4.83062
CLIP2	-0.518939	1.16146	-5.32287	1.90901e-06	4.16113e-05	4.8294
ADAMTS4	0.58871	-0.315095	5.32224	1.91337e-06	4.16609e-05	4.82722
DUOX2	1.631	3.19047	5.32107	1.92156e-06	4.17808e-05	4.82315
PSMB9	0.961184	1.91823	5.32085	1.92308e-06	4.17808e-05	4.82239
CCN2	0.728326	-1.12661	5.32021	1.92755e-06	4.18221e-05	4.82018
LINC00626	0.374108	0.364901	5.31998	1.92919e-06	4.18221e-05	4.81937
USP12	-0.276131	0.654126	-5.31901	1.93601e-06	4.19245e-05	4.816
SAP30	0.488136	-1.81112	5.31778	1.94463e-06	4.20653e-05	4.81176
TMEM173	0.659452	1.8118	5.31654	1.95347e-06	4.21779e-05	4.80744
TRIM22	1.00428	1.7601	5.31645	1.95407e-06	4.21779e-05	4.80714
ZNF585B	-0.199908	0.253684	-5.31526	1.96258e-06	4.2306e-05	4.803
ATP5PO	-0.336254	0.249508	-5.31502	1.96426e-06	4.2306e-05	4.80218
SAA2-SAA4	1.26617	-0.759409	5.31439	1.96875e-06	4.23568e-05	4.80001
RFLNA	-0.776592	4.15896	-5.3132	1.97729e-06	4.24947e-05	4.79588
UBAC1	-0.293197	-0.136378	-5.31222	1.98437e-06	4.26008e-05	4.79247
TPTE2P5	-0.305424	0.552406	-5.31112	1.99227e-06	4.27244e-05	4.78868
PLAAT3	0.56487	-0.250058	5.3103	1.99823e-06	4.28061e-05	4.78583
SNAI1	0.846968	-1.3395	5.3038	2.046e-06	4.37705e-05	4.7633
PI3	1.78483	3.50686	5.30357	2.04765e-06	4.37705e-05	4.76253
RPL22L1	0.659289	-1.43681	5.30164	2.06208e-06	4.40317e-05	4.75583
S100A9	1.53156	1.48065	5.3007	2.06913e-06	4.41319e-05	4.75257
REG4	1.22885	3.8801	5.30042	2.07121e-06	4.41319e-05	4.75162
PDSS1	-0.414536	0.670653	-5.29901	2.08186e-06	4.43113e-05	4.74673
ZNF99	-0.190122	0.0566788	-5.29799	2.08957e-06	4.43897e-05	4.7432
TREM1	0.707552	0.395907	5.29794	2.09e-06	4.43897e-05	4.743
HNMT	-0.551951	1.35293	-5.29758	2.09269e-06	4.43994e-05	4.74178
AQP5	0.988098	0.530973	5.2944	2.11701e-06	4.48675e-05	4.73076
DENND1B	-0.366459	1.04256	-5.29345	2.12428e-06	4.49737e-05	4.72749
CITED2	-0.447179	-0.0552532	-5.29107	2.14272e-06	4.53158e-05	4.71925
MIER3	-0.392532	0.612566	-5.2904	2.148e-06	4.53397e-05	4.7169
PEA15	0.635217	-0.343321	5.29027	2.14896e-06	4.53397e-05	4.71647
CXCL6	1.25883	0.964752	5.29005	2.15068e-06	4.53397e-05	4.71571
FEZ1	0.395436	-1.01456	5.28975	2.15302e-06	4.5341e-05	4.71467
ARSB	0.200879	-0.336276	5.2878	2.16834e-06	4.56154e-05	4.70791
CYP4X1	0.840169	1.12893	5.28733	2.17206e-06	4.56454e-05	4.70628
TGFA	-0.429179	0.735204	-5.28613	2.1815e-06	4.57953e-05	4.70214
KCNJ15	0.760351	0.302545	5.2828	2.20799e-06	4.63026e-05	4.69063
COX6C	-0.494488	0.597321	-5.28066	2.22522e-06	4.65714e-05	4.68322
RAB13	0.471921	-0.205094	5.28063	2.22549e-06	4.65714e-05	4.68311
AKAP1	-0.476554	1.36957	-5.27835	2.24397e-06	4.69088e-05	4.67522
LOC257396	-0.435289	-0.186534	-5.2722	2.29454e-06	4.78983e-05	4.65397
CYYR1	0.610199	0.861173	5.27201	2.29611e-06	4.78983e-05	4.65331
LDB2	0.355729	0.269671	5.27166	2.29907e-06	4.79097e-05	4.65209
TSPAN9	0.326922	0.00532864	5.27022	2.31109e-06	4.81098e-05	4.64712
ADAMTS1	0.63115	-2.33796	5.2698	2.31459e-06	4.81324e-05	4.64567
SPR	-0.536205	1.25233	-5.2682	2.32807e-06	4.83622e-05	4.64014
BRPF3	-0.39086	0.768458	-5.26767	2.33251e-06	4.84037e-05	4.63832
DENND4C	-0.240246	0.362581	-5.26578	2.34862e-06	4.86874e-05	4.63176
INSL4	0.337238	-0.675985	5.26477	2.3572e-06	4.87733e-05	4.62828
RBM17	-0.257523	0.339794	-5.26471	2.35766e-06	4.87733e-05	4.62809
SNHG18	-0.694824	2.4028	-5.26322	2.37044e-06	4.89867e-05	4.62294
RASSF1	0.304801	-0.15804	5.26248	2.37683e-06	4.90677e-05	4.62037
RUNX1	0.336931	-0.742961	5.26091	2.39041e-06	4.9297e-05	4.61494
UBE2Q1	-0.201884	0.512344	-5.26032	2.39551e-06	4.93509e-05	4.61291
ZNF43	-0.201977	-0.00673924	-5.25818	2.4142e-06	4.96845e-05	4.6055
CRNDE	1.08999	-4.23591	5.2578	2.41749e-06	4.97009e-05	4.6042
PLEKHS1	0.972742	2.03987	5.25655	2.4285e-06	4.98245e-05	4.59987
BCAR3	-0.427576	0.955916	-5.2563	2.43065e-06	4.98245e-05	4.59903
ACVR1	0.385466	0.211036	5.25626	2.43101e-06	4.98245e-05	4.59888
GSTM4	-0.434946	0.741666	-5.25477	2.4442e-06	5.0003e-05	4.59373
DAO	-1.11679	1.5291	-5.2547	2.44475e-06	5.0003e-05	4.59351
CDV3	0.47655	0.0149854	5.2535	2.45547e-06	5.01707e-05	4.58934
BAHD1	-0.331828	0.423829	-5.25277	2.46197e-06	5.0252e-05	4.58682
TMEM177	-0.400311	-0.331645	-5.25071	2.48035e-06	5.05754e-05	4.57973
GALNT18	0.50294	0.290217	5.24927	2.49331e-06	5.07876e-05	4.57476
CAPN13	-1.24691	2.28748	-5.24788	2.50596e-06	5.09929e-05	4.56994
NMNAT3	-0.473075	1.10915	-5.24722	2.51196e-06	5.10628e-05	4.56765
AHDC1	0.199459	-0.130629	5.24689	2.51492e-06	5.10709e-05	4.56653
AMACR	-0.882511	1.54331	-5.24648	2.51864e-06	5.10942e-05	4.56512
UNC13D	0.439679	0.420469	5.2462	2.52126e-06	5.10952e-05	4.56413
RASAL1	0.49069	1.09526	5.24535	2.52902e-06	5.12003e-05	4.5612
TNFAIP6	0.615733	0.219955	5.24452	2.53659e-06	5.13015e-05	4.55835
STOM	0.821757	-0.0031458	5.24391	2.54221e-06	5.13588e-05	4.55624
IKBIP	0.512809	-1.16933	5.24365	2.54458e-06	5.13588e-05	4.55535
TYMP	0.927344	2.00225	5.24298	2.55079e-06	5.14318e-05	4.55303
ICAM1	1.06286	-0.995809	5.24214	2.55857e-06	5.15157e-05	4.55013
RAB40B	-0.606204	1.53007	-5.24197	2.56012e-06	5.15157e-05	4.54955
ALDH4A1	0.410275	-1.37119	5.24144	2.56499e-06	5.15615e-05	4.54774
RBPMS-AS1	0.234669	-0.0229149	5.24076	2.57132e-06	5.15946e-05	4.54539
CGAS	0.443831	-0.106544	5.24071	2.57182e-06	5.15946e-05	4.5452
DUSP22	0.367323	-0.246913	5.23904	2.58743e-06	5.18554e-05	4.53944
KCNJ2-AS1	-0.359075	0.807018	-5.23781	2.59897e-06	5.20142e-05	4.53519
GRAMD4	-0.441768	1.41586	-5.23764	2.60058e-06	5.20142e-05	4.5346
FAM20A	0.545628	-0.220892	5.23664	2.60997e-06	5.21497e-05	4.53117
THBS2	0.690026	-4.23213	5.23592	2.61677e-06	5.22331e-05	4.52869
SEPTIN12	-0.318492	0.182836	-5.23544	2.62133e-06	5.226e-05	4.52703
SDCBP	0.31807	0.0964333	5.23523	2.62337e-06	5.226e-05	4.52628
BORCS8-MEF2B	0.39551	1.08778	5.23437	2.63155e-06	5.23705e-05	4.52332
H3F3C	0.415041	0.278451	5.23369	2.63797e-06	5.24177e-05	4.52099
IFI44	0.796417	-0.651592	5.23356	2.63919e-06	5.24177e-05	4.52055
FOXA1	-0.440942	0.809008	-5.23275	2.64703e-06	5.2521e-05	4.51773
HDHD3	-0.518559	1.41258	-5.23204	2.65376e-06	5.2602e-05	4.51531
PLK3	0.886237	-0.190522	5.22807	2.6922e-06	5.33109e-05	4.5016
ADGRE2	0.752047	0.349695	5.22728	2.69985e-06	5.34093e-05	4.49889
LYPD5	1.33652	1.69411	5.22413	2.73086e-06	5.39173e-05	4.48801
ESPN	-0.603086	0.851997	-5.22412	2.73095e-06	5.39173e-05	4.48797
RTN2	0.327323	-0.340099	5.22279	2.7441e-06	5.41232e-05	4.4834
NVL	-0.516056	-0.539518	-5.2217	2.7549e-06	5.42824e-05	4.47965
KCNE3	0.698681	3.263	5.22118	2.76014e-06	5.4332e-05	4.47784
IFT57	-0.293779	0.587314	-5.22023	2.76958e-06	5.44284e-05	4.47459
SATB2-AS1	-0.59903	0.671858	-5.22014	2.77051e-06	5.44284e-05	4.47427
ATG4D	-0.423905	0.861576	-5.2189	2.78293e-06	5.46185e-05	4.47
YBX2	-0.8233	1.43851	-5.21797	2.7923e-06	5.47484e-05	4.4668
MTHFD2	0.679033	-1.65322	5.21748	2.79731e-06	5.47927e-05	4.46509
CXCL11	1.34792	1.21745	5.21575	2.8148e-06	5.50798e-05	4.45915
SLC16A9	-1.49577	2.46689	-5.21549	2.81751e-06	5.50798e-05	4.45823
FDX1	-0.397797	0.341446	-5.21471	2.82545e-06	5.51808e-05	4.45555
SERF1B	-0.68958	0.263	-5.2144	2.82858e-06	5.51878e-05	4.4545
MIR4435-2HG	0.397412	-0.586656	5.21363	2.83651e-06	5.52884e-05	4.45183
TLCD4	-0.509108	0.763248	-5.21208	2.85243e-06	5.55443e-05	4.44649
ANO9	-0.430962	1.78874	-5.21154	2.85796e-06	5.55974e-05	4.44465
DNAAF4	0.63309	-0.534595	5.2102	2.87188e-06	5.57857e-05	4.44002
ABCA12	0.932879	0.258115	5.21007	2.87324e-06	5.57857e-05	4.43957
ARL3	0.246427	-0.465169	5.20947	2.87949e-06	5.58525e-05	4.4375
SAMD13	-0.751139	2.86437	-5.20874	2.88705e-06	5.59447e-05	4.435
BMP7	0.321578	-0.836379	5.20782	2.89672e-06	5.60775e-05	4.43181
NMB	0.718107	-1.36325	5.207	2.90528e-06	5.61885e-05	4.429
TSTD1	-0.476902	2.45817	-5.20504	2.92595e-06	5.65334e-05	4.42224
CCL2	1.20762	0.504178	5.20453	2.93134e-06	5.65826e-05	4.42049
KTN1	-0.406084	0.710306	-5.20359	2.94125e-06	5.66708e-05	4.41727
MIR1915HG	0.605129	-1.66889	5.20356	2.94161e-06	5.66708e-05	4.41716
TBC1D2B	0.293421	0.751855	5.20233	2.95468e-06	5.68676e-05	4.41293
ROR2	0.298859	-0.00639621	5.2018	2.96034e-06	5.69215e-05	4.4111
HOOK1	-0.572263	1.58115	-5.19786	3.00278e-06	5.76818e-05	4.39754
KIF26B	0.23684	0.0583308	5.19713	3.0107e-06	5.77782e-05	4.39503
FAM110A	0.331524	0.264843	5.19574	3.02584e-06	5.79579e-05	4.39025
GNG11	0.981127	-0.975194	5.19574	3.02589e-06	5.79579e-05	4.39023
EXPH5	-1.08756	2.47909	-5.19546	3.02898e-06	5.79612e-05	4.38926
SUOX	-0.361675	0.716144	-5.19367	3.04862e-06	5.8281e-05	4.3831
CEBPA-DT	-0.445755	0.843519	-5.18963	3.09333e-06	5.9059e-05	4.36923
PNRC2	-0.358157	1.14981	-5.18946	3.09525e-06	5.9059e-05	4.36864
GPRC5B	0.606062	-1.09214	5.18877	3.10293e-06	5.91488e-05	4.36628
ANO2	0.568526	-0.696831	5.18797	3.11197e-06	5.92292e-05	4.3635
ZCCHC10	-0.342399	1.04301	-5.18779	3.11396e-06	5.92292e-05	4.36289
MDFI	0.541885	-1.16064	5.18741	3.11825e-06	5.92292e-05	4.36158
PFKFB2	-0.376244	1.07392	-5.18734	3.11905e-06	5.92292e-05	4.36134
PANK3	-0.466248	0.848544	-5.18496	3.14588e-06	5.96479e-05	4.35318
FZD4	0.378958	-0.205971	5.18486	3.14709e-06	5.96479e-05	4.35281
ENSG00000280537	-0.69526	1.3725	-5.18409	3.15587e-06	5.97573e-05	4.35016
ZBP1	0.917936	1.34733	5.18208	3.17884e-06	6.0135e-05	4.34325
FGFR2	-0.490729	0.631272	-5.17657	3.24263e-06	6.12836e-05	4.32431
MIEF1	-0.264422	0.0324602	-5.17573	3.2525e-06	6.14117e-05	4.32142
AFAP1L2	0.432261	1.36826	5.17423	3.27008e-06	6.16852e-05	4.31628
CNST	-0.274576	0.157269	-5.17229	3.29309e-06	6.20605e-05	4.3096
PRRX2	0.830786	-1.73407	5.17101	3.30836e-06	6.22838e-05	4.30519
TRAM2	0.314233	-0.0713365	5.17077	3.31121e-06	6.22838e-05	4.30437
SENP8	-0.292758	0.436172	-5.1688	3.33475e-06	6.26674e-05	4.29762
ASRGL1	0.740324	0.89254	5.1675	3.35038e-06	6.28843e-05	4.29317
CTSH	0.854858	0.623898	5.16732	3.35261e-06	6.28843e-05	4.29253
PDHA1	-0.439473	0.502687	-5.16645	3.36311e-06	6.30219e-05	4.28955
SATB2	-0.79537	2.25524	-5.16423	3.39011e-06	6.34682e-05	4.28193
MMRN2	0.708486	1.45176	5.16332	3.40133e-06	6.36183e-05	4.27879
FCGRT	-0.663529	2.60224	-5.16258	3.41044e-06	6.37287e-05	4.27624
PALMD	0.277479	-0.271116	5.1613	3.42611e-06	6.39615e-05	4.27187
TMEM171	-0.463075	3.01333	-5.1599	3.44345e-06	6.4225e-05	4.26706
CLMN	-0.53668	3.0573	-5.15468	3.50882e-06	6.5383e-05	4.24915
AGRN	0.484497	-0.497354	5.15167	3.54711e-06	6.60347e-05	4.23881
EHD2	0.421488	-0.785732	5.14979	3.5712e-06	6.6421e-05	4.23236
CSF3R	0.401615	0.164836	5.14834	3.58987e-06	6.67059e-05	4.22739
EPB41L4A-DT	-0.350369	1.82889	-5.14636	3.61564e-06	6.71222e-05	4.22058
MAB21L4	-0.855897	1.24951	-5.14591	3.62149e-06	6.71681e-05	4.21904
MPC2	-0.482816	1.68127	-5.14521	3.63062e-06	6.72747e-05	4.21664
BFSP1	0.487946	-1.62048	5.1449	3.63468e-06	6.72872e-05	4.21557
SPIN1	-0.188022	0.0871789	-5.1446	3.63859e-06	6.7297e-05	4.21455
SAR1A	0.31723	0.324024	5.14361	3.65164e-06	6.74757e-05	4.21114
UGGT1	0.345478	-0.140765	5.14212	3.67127e-06	6.77754e-05	4.20603
BDH1	-0.52996	1.85551	-5.13988	3.70094e-06	6.82598e-05	4.19837
MPLKIP	-0.271024	-0.438338	-5.13949	3.70622e-06	6.8294e-05	4.19701
LOC644189	-0.595153	1.61458	-5.13885	3.71473e-06	6.83875e-05	4.19482
COX6A1	-0.30965	0.849892	-5.13817	3.72384e-06	6.84919e-05	4.19249
ST5	0.2878	1.03755	5.13787	3.72789e-06	6.85029e-05	4.19146
SEMA4G	-0.396936	1.74462	-5.13748	3.73308e-06	6.85351e-05	4.19013
C1R	1.11178	1.05442	5.13621	3.75012e-06	6.87844e-05	4.18579
ABCG2	-1.99485	2.19455	-5.13388	3.78174e-06	6.93006e-05	4.17779
TCF15	0.273626	-0.834249	5.13125	3.81772e-06	6.98955e-05	4.16878
NXPE4	-0.893275	5.44481	-5.13082	3.82367e-06	6.99117e-05	4.16729
OXR1	-0.247927	0.0265127	-5.13058	3.82689e-06	6.99117e-05	4.16649
SLC25A43	-0.295093	0.560421	-5.13012	3.83331e-06	6.99117e-05	4.16489
SLC30A10	-1.21825	1.51001	-5.12987	3.83671e-06	6.99117e-05	4.16405
A4GALT	0.520102	-0.124055	5.12985	3.83703e-06	6.99117e-05	4.16397
ENDOD1	-0.770432	2.08062	-5.12966	3.83968e-06	6.99117e-05	4.16331
RBMS1	0.759065	-1.34877	5.12836	3.85759e-06	7.01526e-05	4.15888
CETN2	0.306929	-0.205168	5.12819	3.85996e-06	7.01526e-05	4.1583
PLPP6	-0.382316	1.26673	-5.12786	3.86458e-06	7.01724e-05	4.15716
GPX7	0.611817	-0.695086	5.12597	3.89096e-06	7.0587e-05	4.15068
FGD5	0.553298	0.372745	5.12514	3.90254e-06	7.07327e-05	4.14785
GRB10	0.493543	-1.57732	5.12381	3.92132e-06	7.09492e-05	4.14327
SLC25A20	-0.512398	1.94777	-5.12379	3.92162e-06	7.09492e-05	4.1432
FAM225B	0.33886	-0.0634756	5.12061	3.96667e-06	7.1699e-05	4.13232
HOXA10	-0.372937	1.26223	-5.11751	4.01116e-06	7.24375e-05	4.1217
DEF8	0.529357	-1.10245	5.11587	4.03486e-06	7.27994e-05	4.11609
SETD9	-0.724514	0.723451	-5.11392	4.06317e-06	7.32438e-05	4.10943
SLC9A3R1	-0.715507	1.11782	-5.11331	4.07219e-06	7.334e-05	4.10732
SLFN11	0.89906	-1.22321	5.11165	4.09648e-06	7.368e-05	4.10165
FXYD3	-0.621726	4.81112	-5.11152	4.09847e-06	7.368e-05	4.10119
STX12	-0.267008	1.25783	-5.10555	4.18727e-06	7.52083e-05	4.08078
DERA	-0.457618	0.671487	-5.10527	4.19155e-06	7.52174e-05	4.07981
PGM3	0.503657	0.110112	5.10454	4.20257e-06	7.53185e-05	4.07731
PRKACB	-0.459649	2.10831	-5.10434	4.2056e-06	7.53185e-05	4.07662
KBTBD11	-0.612041	3.04638	-5.10414	4.20854e-06	7.53185e-05	4.07595
APOL3	0.75621	1.51511	5.10348	4.2186e-06	7.54306e-05	4.07368
AVPI1	-0.510365	0.460585	-5.10305	4.2251e-06	7.54791e-05	4.07222
BICDL2	-0.575251	3.9366	-5.10108	4.25511e-06	7.5947e-05	4.06548
KCNN4	0.405301	1.37201	5.10064	4.26172e-06	7.59968e-05	4.064
OCRL	-0.257627	0.164949	-5.09975	4.27547e-06	7.61738e-05	4.06093
ZNF738	-0.157623	-0.0822542	-5.09927	4.28283e-06	7.62367e-05	4.05929
SLC35D1	-0.467654	2.11123	-5.09818	4.29957e-06	7.64662e-05	4.05558
NAT14	0.395552	-1.63056	5.09793	4.3035e-06	7.64678e-05	4.05471
ZBTB47	0.283935	-0.145503	5.09438	4.35863e-06	7.73213e-05	4.04259
SH3PXD2B	0.228351	0.000254409	5.09434	4.3593e-06	7.73213e-05	4.04244
MYZAP	-0.607158	1.85589	-5.09351	4.37231e-06	7.7483e-05	4.0396
PTPRM	0.535186	-0.770516	5.09301	4.38019e-06	7.75536e-05	4.03789
CBX3	0.444672	-1.33709	5.091	4.41196e-06	7.80465e-05	4.03101
GEM	0.913827	-0.237483	5.09047	4.42031e-06	7.81249e-05	4.02921
TACSTD2	1.17568	-2.70789	5.08978	4.43133e-06	7.82501e-05	4.02684
NPY1R	-0.754325	0.304793	-5.08939	4.43738e-06	7.82876e-05	4.02554
LINC01578	-0.246594	0.499632	-5.08889	4.44539e-06	7.83594e-05	4.02382
LEAP2	-0.970851	-0.808709	-5.08863	4.44956e-06	7.83635e-05	4.02293
NFKBIZ	0.828942	1.18619	5.08806	4.45867e-06	7.84544e-05	4.02098
ANGPTL4	1.2982	-1.2392	5.08756	4.46669e-06	7.85262e-05	4.01927
SLC2A14	0.864642	-3.47496	5.08683	4.47849e-06	7.86641e-05	4.01676
SLC39A5	-0.793608	2.46733	-5.08541	4.50129e-06	7.89812e-05	4.01192
NAT2	-0.68125	3.32122	-5.08521	4.50448e-06	7.89812e-05	4.01125
SCIN	-0.757657	2.96204	-5.08442	4.51733e-06	7.91368e-05	4.00854
EDNRA	0.411377	0.110139	5.08226	4.55249e-06	7.96825e-05	4.00116
ASPH	0.518144	-0.433579	5.08159	4.56344e-06	7.97224e-05	3.99887
FAM234A	-0.386755	0.1977	-5.08137	4.56706e-06	7.97224e-05	3.99811
MPZL2	-0.398861	1.29632	-5.08125	4.56902e-06	7.97224e-05	3.9977
STX3	-0.545796	1.357	-5.08114	4.57079e-06	7.97224e-05	3.99734
RPL26	-0.218797	0.295423	-5.07951	4.59752e-06	8.01184e-05	3.99178
CMBL	-0.779978	1.47985	-5.07873	4.61044e-06	8.0163e-05	3.98911
SEMA5B	0.445414	-0.638201	5.07865	4.61185e-06	8.0163e-05	3.98882
LBH	0.465995	0.75717	5.07863	4.61216e-06	8.0163e-05	3.98876
SHF	0.403232	0.256221	5.07838	4.61625e-06	8.01641e-05	3.98791
CARD16	0.651224	2.08048	5.07805	4.62174e-06	8.01894e-05	3.98678
CAT	-0.344807	0.763987	-5.07668	4.64447e-06	8.05135e-05	3.98211
LYPD1	0.230567	-0.987652	5.07571	4.66073e-06	8.07252e-05	3.97878
EVA1B	0.558432	0.142321	5.07545	4.66503e-06	8.07293e-05	3.97791
TEK	0.855046	1.30853	5.07423	4.68546e-06	8.10125e-05	3.97374
UBOX5	-0.177691	-0.015011	-5.07118	4.73695e-06	8.18317e-05	3.96334
COL8A1	0.808734	-1.65796	5.0706	4.74691e-06	8.19325e-05	3.96134
TSTA3	0.589466	1.23251	5.06826	4.7869e-06	8.25512e-05	3.95336
MAP4	0.295401	-0.406945	5.06721	4.80496e-06	8.27908e-05	3.94977
TGFBR2	0.514204	0.85044	5.06487	4.84534e-06	8.34145e-05	3.9418
GRK5	0.803235	0.86589	5.06457	4.85057e-06	8.34323e-05	3.94078
NPC2	0.35823	0.965963	5.06433	4.85483e-06	8.34334e-05	3.93994
KDF1	-0.402547	2.96872	-5.06255	4.8859e-06	8.3895e-05	3.93387
INPP5J	-0.427101	0.558372	-5.06148	4.90468e-06	8.4047e-05	3.93022
RHOBTB2	0.453485	-0.867886	5.06143	4.90553e-06	8.4047e-05	3.93005
PPM1H	0.185955	-0.286584	5.06132	4.90742e-06	8.4047e-05	3.92968
CLDN23	-0.933178	5.31961	-5.06062	4.91967e-06	8.41428e-05	3.92731
PLOD1	0.403087	-1.84029	5.06052	4.92147e-06	8.41428e-05	3.92696
THEMIS2	0.931702	0.896814	5.0584	4.95895e-06	8.47108e-05	3.91974
REXO2	0.353151	-0.815913	5.0576	4.97324e-06	8.4868e-05	3.917
TBCD	0.234411	-0.292036	5.05741	4.97669e-06	8.4868e-05	3.91634
LRRC1	-0.547404	2.49821	-5.05659	4.99127e-06	8.50325e-05	3.91356
RMND5A	-0.531076	0.799724	-5.05587	5.00415e-06	8.50325e-05	3.91111
KATNAL1	0.39663	-1.72057	5.05582	5.00511e-06	8.50325e-05	3.91092
GALNT14	1.10739	-2.86515	5.05576	5.00617e-06	8.50325e-05	3.91072
OSBPL8	0.287818	-0.568565	5.0553	5.01442e-06	8.50325e-05	3.90915
ECM1	0.572573	-0.87758	5.05525	5.01535e-06	8.50325e-05	3.90898
PHTF1	0.319355	-0.446459	5.0549	5.02163e-06	8.50325e-05	3.90779
CCDC88A	0.439857	-1.68879	5.05479	5.02363e-06	8.50325e-05	3.90741
BEST2	-1.26406	3.86349	-5.05452	5.02849e-06	8.50325e-05	3.90649
ATP5F1C	-0.428416	0.699877	-5.05449	5.02905e-06	8.50325e-05	3.90638
C1orf216	0.216614	-0.672273	5.05113	5.08979e-06	8.59863e-05	3.89495
SLC39A6	0.348805	-2.35139	5.05046	5.10218e-06	8.60566e-05	3.89264
MR1	0.498093	0.0803059	5.05022	5.10641e-06	8.60566e-05	3.89185
LHFPL6	0.954063	0.383248	5.0502	5.10692e-06	8.60566e-05	3.89175
STEAP4	0.337679	0.116719	5.04937	5.1221e-06	8.61771e-05	3.88893
USP35	0.528313	-0.676511	5.04933	5.12273e-06	8.61771e-05	3.88881
MVB12B	-0.217134	0.320369	-5.04817	5.14404e-06	8.64625e-05	3.88486
FIBIN	0.483915	0.50196	5.04735	5.15916e-06	8.66434e-05	3.88207
HSD11B1	0.942318	0.857338	5.04675	5.17028e-06	8.6757e-05	3.88002
P3H3	0.452762	-2.05296	5.04626	5.17948e-06	8.68381e-05	3.87833
FAM47E-STBD1	-0.795404	1.12922	-5.04572	5.1894e-06	8.68585e-05	3.87651
IGLL5	1.32523	1.10257	5.04572	5.18943e-06	8.68585e-05	3.8765
AKAP7	-0.691755	1.68266	-5.04289	5.24219e-06	8.76548e-05	3.86687
IL26	0.288343	0.287094	5.04241	5.25131e-06	8.76548e-05	3.86522
ARHGAP23	0.859093	-0.953689	5.04214	5.25642e-06	8.76548e-05	3.86429
STAT5A	0.251515	-1.08213	5.04209	5.25733e-06	8.76548e-05	3.86413
CARD17	0.731622	2.77669	5.042	5.25902e-06	8.76548e-05	3.86382
COPB2	0.331066	0.203068	5.03706	5.35273e-06	8.9142e-05	3.84701
APCDD1	0.840047	1.32342	5.03581	5.37681e-06	8.94681e-05	3.84274
ITGAV	0.336564	0.35548	5.03426	5.40673e-06	8.98908e-05	3.83746
CAMK2N1	-0.789138	1.88515	-5.03303	5.43044e-06	9.02097e-05	3.83329
PIM2	1.43889	-0.378224	5.03273	5.43627e-06	9.02312e-05	3.83227
EGR3	0.654042	0.0801947	5.03191	5.45235e-06	9.0414e-05	3.82946
SDC2	0.611636	-1.71378	5.0317	5.45637e-06	9.0414e-05	3.82876
ALKBH7	-0.404643	1.4025	-5.031	5.4701e-06	9.05354e-05	3.82637
TRABD2A	-0.675327	3.07211	-5.03086	5.4728e-06	9.05354e-05	3.8259
NCDN	0.249845	-0.714509	5.02894	5.51049e-06	9.10487e-05	3.81937
THRA	-0.467111	0.567453	-5.02878	5.51372e-06	9.10487e-05	3.81881
ACOT4	-0.527247	1.07078	-5.02858	5.51755e-06	9.10487e-05	3.81815
RHOJ	0.396334	0.0545691	5.02799	5.52923e-06	9.11659e-05	3.81614
CAMK1D	-0.550943	0.933346	-5.02698	5.54934e-06	9.14217e-05	3.81268
ZCCHC24	0.394455	-0.139696	5.02593	5.57016e-06	9.16603e-05	3.80912
DLD	-0.3486	0.274108	-5.02579	5.57304e-06	9.16603e-05	3.80863
SWAP70	0.344082	0.0723214	5.02493	5.59006e-06	9.17976e-05	3.80573
SEC13	0.45447	0.16417	5.02491	5.59061e-06	9.17976e-05	3.80563
TTPAL	0.202152	-0.75896	5.02454	5.59789e-06	9.18413e-05	3.8044
MUC1	0.835623	2.41643	5.02325	5.62382e-06	9.21276e-05	3.8
MFGE8	0.284943	-0.531581	5.02321	5.62459e-06	9.21276e-05	3.79987
STMND1	-0.515689	0.698705	-5.022	5.64893e-06	9.24502e-05	3.79576
TMEM129	-0.289227	0.859659	-5.02081	5.67308e-06	9.26919e-05	3.7917
ITPRIP	0.467772	-1.23534	5.02062	5.67688e-06	9.26919e-05	3.79106
C1RL	0.317367	0.835881	5.02058	5.67767e-06	9.26919e-05	3.79093
CXCR2	0.409215	0.261182	5.01943	5.70108e-06	9.29977e-05	3.78701
ACOT8	-0.501392	0.897974	-5.01901	5.70966e-06	9.30615e-05	3.78558
RAB34	0.859065	-2.14433	5.01824	5.7255e-06	9.32432e-05	3.78295
GMNN	-0.515223	-0.944052	-5.01778	5.73476e-06	9.33177e-05	3.78141
DNAH2	0.244659	-0.344483	5.0161	5.76937e-06	9.38042e-05	3.77568
RNF135	-0.328821	0.769108	-5.01562	5.77927e-06	9.38884e-05	3.77405
CNNM4	-0.825005	3.32529	-5.01219	5.85064e-06	9.49703e-05	3.76237
MMEL1	-0.376535	0.958307	-5.01096	5.8763e-06	9.5309e-05	3.75821
MTM1	-0.493809	1.99695	-5.01014	5.89353e-06	9.55108e-05	3.75542
TMPRSS3	0.455199	-0.629261	5.00794	5.94002e-06	9.61859e-05	3.74795
CASD1	-0.400151	0.886424	-5.00581	5.98545e-06	9.68426e-05	3.7407
NARS	-0.286428	0.102571	-5.00399	6.02436e-06	9.73929e-05	3.73453
THNSL1	-0.265518	0.103405	-5.00324	6.0406e-06	9.75763e-05	3.73197
ALDH1A3	0.325347	0.160509	5.002	6.06747e-06	9.78998e-05	3.72775
NUDT15	-0.336992	0.333113	-5.00172	6.07357e-06	9.78998e-05	3.72679
IGHV2-70D	0.81233	0.893272	5.00163	6.07538e-06	9.78998e-05	3.72651
HSD17B2	-1.01947	3.73213	-5.00131	6.08231e-06	9.7932e-05	3.72543
LOC648987	0.368748	0.451209	5.00029	6.10464e-06	9.81936e-05	3.72194
S100Z	0.188021	-0.293528	5.00011	6.10842e-06	9.81936e-05	3.72135
IL15RA	0.51031	1.38495	4.9966	6.1854e-06	9.93508e-05	3.70944
LTN1	-0.20537	0.0077118	-4.99367	6.25058e-06	0.000100202	3.69946
SPNS3	0.418759	0.199624	4.99365	6.25106e-06	0.000100202	3.69939
RPIA	-0.372079	0.452544	-4.99353	6.25353e-06	0.000100202	3.69901
AFG3L2	-0.562695	0.357301	-4.99278	6.27036e-06	0.000100391	3.69646
PLEKHO2	0.717654	0.532532	4.99177	6.29292e-06	0.000100672	3.69304
ST13	-0.178708	-0.339949	-4.99123	6.30515e-06	0.000100786	3.69119
ETV7	0.756053	1.86252	4.9895	6.3443e-06	0.000101331	3.6853
BHLHA15	0.678285	0.484045	4.9889	6.3579e-06	0.000101466	3.68327
DENND5A	0.638021	-1.73392	4.98862	6.3641e-06	0.000101484	3.68234
DLG1	-0.206356	0.46977	-4.98686	6.4042e-06	0.000102042	3.67637
ACPP	0.465602	0.821427	4.98618	6.41974e-06	0.000102207	3.67406
LPL	0.904088	-0.962992	4.98453	6.45767e-06	0.000102729	3.66846
ZMYND15	0.447809	1.11443	4.98215	6.51263e-06	0.000103473	3.66039
MPST	-0.644287	1.73684	-4.98206	6.51486e-06	0.000103473	3.66007
CGREF1	1.26292	-0.309151	4.98013	6.55974e-06	0.000104103	3.65354
FAM98C	-0.268714	0.842777	-4.97915	6.58278e-06	0.000104386	3.6502
ABHD15	-0.333682	0.574273	-4.97772	6.61649e-06	0.000104837	3.64535
JAKMIP1	0.856712	-1.82592	4.97581	6.66154e-06	0.000105466	3.63889
MMUT	-0.388509	0.812021	-4.97508	6.6789e-06	0.000105623	3.63642
CNNM2	-0.342654	0.36569	-4.97495	6.68201e-06	0.000105623	3.63597
ADGRL2	0.411748	-0.175107	4.97388	6.70752e-06	0.000105942	3.63235
SPAG4	0.872522	-1.3745	4.97327	6.7221e-06	0.000106088	3.63028
PDIA4	0.648893	-0.0591081	4.97177	6.75833e-06	0.000106573	3.62517
CAV2	0.312964	-0.259261	4.97155	6.76353e-06	0.000106573	3.62444
SLC22A4	-0.578361	-0.357575	-4.97054	6.78779e-06	0.00010687	3.62103
ZNF493	-0.280634	-0.281997	-4.97026	6.79464e-06	0.000106893	3.62007
NEK3	-0.401525	0.865698	-4.96886	6.82853e-06	0.000107342	3.61534
DEFB4A	2.51631	1.52669	4.96851	6.83725e-06	0.000107394	3.61413
TPST1	0.769681	-1.68137	4.96818	6.84526e-06	0.000107435	3.61301
OSCP1	0.413959	0.250725	4.96607	6.89684e-06	0.000108159	3.60588
C2orf68	-0.376237	-0.0589877	-4.96543	6.91257e-06	0.000108321	3.60371
DAD1	0.323816	0.133311	4.96364	6.95693e-06	0.00010893	3.59762
CASP10	0.538746	2.07754	4.9627	6.9801e-06	0.000109112	3.59446
ZNRF2	-0.306524	1.68919	-4.96257	6.98329e-06	0.000109112	3.59403
BAG3	0.445159	0.113353	4.96251	6.98499e-06	0.000109112	3.5938
IFITM3	0.904772	0.605971	4.96151	7.00983e-06	0.000109414	3.59042
TESK2	-0.513999	0.902122	-4.96011	7.04493e-06	0.000109839	3.58567
SRGN	0.786406	0.858771	4.95998	7.04811e-06	0.000109839	3.58524
PTPRE	0.352318	1.55834	4.95932	7.06467e-06	0.000109985	3.58301
PTGIR	0.399211	0.482995	4.95917	7.06851e-06	0.000109985	3.58249
RABGAP1L	0.356816	0.854605	4.9585	7.08532e-06	0.00011016	3.58023
PRELID2	-0.424966	1.77412	-4.95816	7.09383e-06	0.000110206	3.57909
GLTP	-0.608818	1.42342	-4.95732	7.11506e-06	0.00011045	3.57625
A1CF	-0.798706	1.77208	-4.95634	7.13998e-06	0.00011075	3.57292
PRAF2	0.401009	-0.372036	4.95596	7.14968e-06	0.000110815	3.57163
ERICH5	-0.721268	1.963	-4.95554	7.1605e-06	0.000110896	3.5702
CAV1	0.775315	-2.48747	4.95441	7.18916e-06	0.000111253	3.5664
EMBP1	0.494495	-0.11475	4.95362	7.20941e-06	0.00011148	3.56372
SPCS3	0.795975	0.268069	4.95313	7.22201e-06	0.000111588	3.56206
ELL3	-0.520355	2.21568	-4.95259	7.23606e-06	0.000111718	3.56021
NDUFS4	-0.202075	0.202669	-4.95221	7.24586e-06	0.000111783	3.55893
SAMD4A	0.339439	-0.455092	4.95158	7.26211e-06	0.000111947	3.5568
MRGPRF	0.521295	0.695784	4.95132	7.2687e-06	0.000111962	3.55593
CHP1	-0.535728	1.95244	-4.95093	7.2789e-06	0.000112032	3.5546
PLEKHA6	-0.476681	2.5875	-4.95016	7.29879e-06	0.000112251	3.552
SOCS3	0.977581	0.311114	4.94937	7.31949e-06	0.000112483	3.54931
SH2B2	0.386384	-0.158556	4.94868	7.3374e-06	0.000112671	3.54699
ENSG00000254862	-0.25044	0.258021	-4.94812	7.35194e-06	0.00011278	3.54511
PPTC7	-0.359066	0.48268	-4.94797	7.35586e-06	0.00011278	3.5446
VIM	0.856345	-2.30957	4.94769	7.36319e-06	0.000112806	3.54365
CARD14	0.556399	-0.22338	4.94672	7.38874e-06	0.00011311	3.54036
ATP10D	0.284075	0.39473	4.94586	7.41123e-06	0.000113367	3.53747
SFXN3	0.184877	-0.424042	4.94504	7.43303e-06	0.000113613	3.53467
MYCBP2	0.451192	-0.335605	4.94475	7.44066e-06	0.000113643	3.5337
PLEKHH3	0.452105	-1.15296	4.94453	7.44653e-06	0.000113645	3.53295
NGEF	-0.445899	0.518805	-4.94395	7.46195e-06	0.000113792	3.53098
SUCLG2	-0.627214	1.89467	-4.94373	7.46759e-06	0.000113792	3.53026
ABHD16B	-0.178798	0.179491	-4.94297	7.48789e-06	0.00011396	3.52768
CENPV	-0.333782	-0.422685	-4.94289	7.49007e-06	0.00011396	3.52741
WDR20	-0.214823	0.48098	-4.94217	7.50914e-06	0.000114097	3.52499
P4HB	0.552781	0.47465	4.94212	7.51055e-06	0.000114097	3.52481
VAV3	-0.855336	2.63044	-4.941	7.54048e-06	0.000114465	3.52103
CCDC28B	0.417524	-1.29332	4.93532	7.69454e-06	0.000116714	3.5018
GRSF1	-0.191045	0.283179	-4.9349	7.7058e-06	0.000116796	3.50041
CISD3	-0.345208	1.52098	-4.93419	7.72538e-06	0.000117004	3.49799
SHMT2	0.363572	-1.53734	4.93129	7.80533e-06	0.000118125	3.4882
TLNRD1	0.423446	0.185393	4.93073	7.82112e-06	0.000118274	3.48628
GRHL3	0.591709	-0.319287	4.9301	7.83839e-06	0.000118445	3.48419
GLT1D1	0.678512	-1.21969	4.92979	7.84714e-06	0.000118487	3.48313
STXBP6	0.473662	1.78547	4.92832	7.88838e-06	0.00011902	3.47814
FAM167A	0.246532	-0.20953	4.92755	7.90991e-06	0.0001192	3.47555
AKAP2	0.451748	-0.125772	4.92746	7.9123e-06	0.0001192	3.47526
LILRA3	0.774979	0.684381	4.9269	7.92813e-06	0.000119348	3.47336
DMRTA1	-0.574023	0.211927	-4.92638	7.94294e-06	0.00011948	3.47159
EMILIN2	0.451694	1.2887	4.92545	7.96914e-06	0.000119784	3.46846
CDH11	0.676999	0.915717	4.92494	7.98361e-06	0.000119911	3.46673
EFNA5	-0.225643	-0.331766	-4.92458	7.99382e-06	0.000119945	3.46552
UGT1A8	-1.1413	2.61374	-4.92444	7.99791e-06	0.000119945	3.46503
ACADSB	-0.297543	0.101692	-4.92402	8.00974e-06	0.000120031	3.46363
ABCC3	-0.510956	3.2877	-4.92372	8.0183e-06	0.000120069	3.46261
MIF	0.489172	-0.966102	4.92089	8.09939e-06	0.000121192	3.45305
OPA1	-0.213992	-0.120725	-4.92023	8.11836e-06	0.000121385	3.45082
HHLA2	-0.796002	2.10593	-4.91983	8.12976e-06	0.000121464	3.44949
RAB40C	-0.393616	0.53265	-4.91935	8.14374e-06	0.000121582	3.44785
ADPRHL1	-0.473744	0.660221	-4.91676	8.21891e-06	0.000122523	3.43912
CES2	-0.889315	3.09328	-4.91675	8.21909e-06	0.000122523	3.4391
NDUFA10	-0.434448	0.667282	-4.91599	8.24144e-06	0.000122764	3.43652
NOS2	1.60785	4.90755	4.91508	8.26803e-06	0.000123068	3.43345
CXCL16	0.499664	1.13064	4.91092	8.39105e-06	0.000124806	3.41941
SECISBP2	-0.202163	0.310488	-4.90765	8.48914e-06	0.000126171	3.40837
ENSG00000231705	-0.514601	-0.14798	-4.90706	8.50673e-06	0.000126338	3.4064
AMY1C	-0.542281	1.57701	-4.90564	8.54983e-06	0.000126873	3.4016
PDGFB	0.239605	-0.016145	4.90545	8.55554e-06	0.000126873	3.40096
CH25H	0.907419	1.79209	4.90522	8.56253e-06	0.000126882	3.40019
NFE4	0.57927	-1.5691	4.90439	8.58782e-06	0.000127162	3.39738
BCL6B	0.455573	0.530032	4.90404	8.59856e-06	0.000127227	3.39619
PREB	0.412753	-0.236572	4.90265	8.64101e-06	0.00012776	3.39151
PROK2	1.79948	1.14485	4.90166	8.67137e-06	0.000128114	3.38818
CHST15	0.951283	-0.45927	4.90093	8.69393e-06	0.000128351	3.38571
TUSC1	-0.518234	1.17743	-4.90032	8.71279e-06	0.000128535	3.38365
ADCY6	-0.553202	1.26101	-4.90003	8.72172e-06	0.000128571	3.38268
TLCD5	0.48292	-2.27667	4.8997	8.73202e-06	0.000128628	3.38155
PLK2	0.750684	-0.771325	4.89817	8.77933e-06	0.000129229	3.37642
SLC25A38	-0.272469	0.485507	-4.89708	8.81344e-06	0.000129635	3.37273
MLX	-0.292151	1.04874	-4.89653	8.83066e-06	0.000129792	3.37088
URI1	-0.195713	-0.219894	-4.89209	8.97073e-06	0.000131754	3.35592
TSPAN7	-0.867385	1.62564	-4.89157	8.98731e-06	0.0001319	3.35417
CD248	0.873102	0.101272	4.88863	9.08147e-06	0.000133184	3.34426
MAGI2	-0.355579	0.430008	-4.88747	9.11883e-06	0.000133633	3.34036
ADCY4	0.545508	2.91962	4.8855	9.18285e-06	0.000134472	3.33371
FAM43B	-0.588052	1.17792	-4.88501	9.19866e-06	0.000134605	3.33208
AEBP1	0.697934	-0.951154	4.88406	9.2297e-06	0.00013496	3.32887
CLDN14	1.24479	-0.0717402	4.8811	9.32705e-06	0.000136196	3.3189
MAGED2	0.506749	-0.656272	4.88107	9.32792e-06	0.000136196	3.31882
GABBR1	1.72997	1.77732	4.88023	9.35587e-06	0.000136504	3.31597
CCN1	1.05791	-2.35075	4.87878	9.40389e-06	0.000137104	3.31111
LYZ	1.23965	1.76593	4.87713	9.45918e-06	0.000137753	3.30554
BCL6	0.774436	-0.231189	4.87704	9.46225e-06	0.000137753	3.30523
C1orf115	-0.642434	1.9296	-4.87647	9.48105e-06	0.000137926	3.30334
FAM229B	0.629476	-1.61039	4.87504	9.52943e-06	0.00013838	3.29851
ASCC1	0.299209	-0.665652	4.87494	9.53262e-06	0.00013838	3.29819
LRRC8D	-0.315598	0.0426592	-4.87473	9.53966e-06	0.00013838	3.29749
MPL	-0.157731	0.359153	-4.87461	9.54384e-06	0.00013838	3.29707
ELMSAN1	-0.287418	0.461668	-4.87452	9.54703e-06	0.00013838	3.29675
CCDC167	0.583922	-0.391527	4.87215	9.62747e-06	0.000139444	3.28878
TIE1	0.46926	0.336507	4.87132	9.65564e-06	0.00013975	3.286
MIR600HG	-0.17556	-0.22978	-4.871	9.66659e-06	0.000139807	3.28493
CXCL8	1.3091	-0.734261	4.87045	9.68535e-06	0.000139977	3.28308
IFIT3	0.702997	0.777278	4.86858	9.74964e-06	0.000140804	3.2768
RNF152	-0.528724	1.09916	-4.86493	9.87661e-06	0.000142534	3.2645
SLC25A36	-0.309691	-0.718988	-4.86471	9.88411e-06	0.000142539	3.26378
BMERB1	0.541955	-1.25248	4.86447	9.89275e-06	0.00014256	3.26295
TMEM92	0.720753	1.16564	4.86351	9.92636e-06	0.000142941	3.25973
S100A13	0.512187	-0.768871	4.86276	9.95275e-06	0.000143217	3.25721
IL13RA2	1.09019	0.725142	4.86237	9.96646e-06	0.000143311	3.2559
TPK1	0.756444	2.58011	4.86084	1.00205e-05	0.0001439	3.25076
SLPI	1.1678	1.0001	4.8608	1.00219e-05	0.0001439	3.25063
CDKN2AIPNL	-0.399844	-0.723527	-4.86024	1.00416e-05	0.00014408	3.24876
ABCA7	0.44134	-0.417407	4.8597	1.0061e-05	0.000144253	3.24693
APLN	0.606148	-0.548928	4.85921	1.00783e-05	0.000144398	3.2453
DPP7	0.474943	-1.01264	4.85885	1.00914e-05	0.000144481	3.24407
SLC51A	-1.98369	1.03474	-4.85853	1.01026e-05	0.000144537	3.24301
NUCB2	0.602323	-0.27587	4.85573	1.02034e-05	0.000145875	3.23358
CHPF	0.295874	-0.438057	4.85527	1.02199e-05	0.000146006	3.23204
NIBAN1	0.544451	-0.630704	4.85499	1.02299e-05	0.000146045	3.23111
TEKT5	-0.473159	0.414086	-4.85336	1.0289e-05	0.000146782	3.22564
FNDC4	0.362164	-0.478372	4.85251	1.03202e-05	0.000147061	3.22276
COQ9	-0.332984	0.407743	-4.85242	1.03233e-05	0.000147061	3.22248
ABLIM3	0.237647	-0.702158	4.85191	1.03419e-05	0.000147186	3.22077
BLOC1S1	-0.405168	1.48407	-4.85163	1.03521e-05	0.000147186	3.21983
ENSG00000258122	-0.677652	1.1881	-4.85152	1.03563e-05	0.000147186	3.21944
MFAP2	0.420425	-1.31133	4.85125	1.03661e-05	0.000147186	3.21855
CCDC69	0.309238	0.301718	4.85117	1.0369e-05	0.000147186	3.21828
FILIP1L	0.653129	0.79002	4.85006	1.041e-05	0.000147662	3.21453
NDUFA8	-0.277134	0.0289361	-4.84966	1.04246e-05	0.000147763	3.21321
TNFRSF12A	0.855246	-2.20077	4.84928	1.04386e-05	0.000147857	3.21192
PIEZO1	0.447735	-0.879585	4.8489	1.04527e-05	0.000147951	3.21064
MMP19	0.500448	0.847385	4.84771	1.04967e-05	0.000148468	3.20666
DHX58	0.51081	0.548314	4.84739	1.05084e-05	0.000148529	3.20559
MAPKAPK2	0.280688	0.243566	4.84681	1.05301e-05	0.00014873	3.20363
EMB	0.853003	0.312712	4.84612	1.05559e-05	0.00014892	3.20131
TPRG1L	-0.502526	2.1245	-4.84605	1.05586e-05	0.00014892	3.20107
PCNX1	0.388545	-0.117885	4.84445	1.06184e-05	0.000149658	3.1957
FAM160B1	0.212912	0.0464534	4.84372	1.06456e-05	0.000149886	3.19327
MAST2	-0.614869	0.519469	-4.84362	1.06497e-05	0.000149886	3.19291
AMPD3	0.364282	1.1427	4.84151	1.07292e-05	0.000150898	3.18585
GUK1	0.320743	0.444683	4.84078	1.0757e-05	0.000151183	3.18339
LINC00312	0.178839	-0.15947	4.83955	1.08037e-05	0.000151732	3.17927
ITGAX	0.784047	1.1327	4.83711	1.08971e-05	0.000152936	3.17109
EGR2	1.06527	1.36409	4.83642	1.09239e-05	0.000153204	3.16876
PLEKHG6	-0.47786	1.68662	-4.83607	1.09373e-05	0.00015324	3.1676
PLCD3	-0.518392	1.20926	-4.83592	1.0943e-05	0.00015324	3.1671
TINAG	-0.527628	1.32199	-4.83575	1.09496e-05	0.00015324	3.16653
SEC22C	0.35113	-0.706052	4.83541	1.0963e-05	0.000153242	3.16537
KCND3	0.597294	0.689352	4.83529	1.09677e-05	0.000153242	3.16496
EPHX4	0.489476	-0.127241	4.83515	1.09728e-05	0.000153242	3.16452
TAP1	0.641728	2.48474	4.83486	1.09843e-05	0.000153295	3.16352
PARP9	0.620966	2.04748	4.83396	1.1019e-05	0.000153671	3.16053
PGRMC1	-0.372574	0.50227	-4.83296	1.10582e-05	0.00015411	3.15716
SLC5A11	-1.33074	0.787534	-4.83266	1.10699e-05	0.000154165	3.15615
DISP2	-0.870492	1.83267	-4.82971	1.11858e-05	0.000155601	3.14625
HNF1B	-0.438118	1.03523	-4.8295	1.11938e-05	0.000155601	3.14558
USP7	-0.344811	0.378054	-4.82939	1.11982e-05	0.000155601	3.1452
CLCA3P	0.545453	0.81305	4.82924	1.12043e-05	0.000155601	3.14469
ACTN3	0.211295	-0.232609	4.82874	1.12242e-05	0.00015577	3.143
RAB24	0.386216	0.0582226	4.82505	1.1371e-05	0.000157695	3.13066
GLYATL1	0.868538	-0.0502708	4.82486	1.13788e-05	0.000157695	3.13001
HOMER1	0.499749	-2.45642	4.82446	1.13949e-05	0.000157808	3.12867
MAP7D1	0.376446	-0.559964	4.82316	1.14472e-05	0.000158422	3.12432
PCOLCE	0.755888	-1.69251	4.8223	1.1482e-05	0.000158794	3.12143
DLAT	-0.287275	0.0495856	-4.82182	1.15014e-05	0.00015895	3.11984
EDIL3	-0.698774	1.99737	-4.8212	1.15266e-05	0.000159089	3.11775
KIF3A	0.432383	-1.20371	4.82086	1.15405e-05	0.000159089	3.11661
ELF4	-0.262982	1.08006	-4.82085	1.1541e-05	0.000159089	3.11657
TMEM209	-0.16741	-0.22788	-4.82079	1.15433e-05	0.000159089	3.11638
NFS1	-0.196947	-0.467534	-4.81857	1.16341e-05	0.000160132	3.10894
GOLGA1	-0.231716	0.641771	-4.81855	1.16352e-05	0.000160132	3.10885
PMEPA1	0.719714	1.39185	4.81667	1.17124e-05	0.000161084	3.10257
CDK3	-0.337576	0.0762124	-4.81636	1.17254e-05	0.000161151	3.10152
MTIF2	-0.285097	0.0328262	-4.81615	1.17339e-05	0.000161157	3.10083
SLC2A3	0.312833	-1.50985	4.81471	1.17934e-05	0.000161863	3.09602
PIGZ	-1.11339	2.82437	-4.81287	1.18705e-05	0.000162809	3.08983
MACROD1	-0.322142	-0.55992	-4.81199	1.19071e-05	0.000163198	3.08691
MFRP	-0.36295	0.532422	-4.8107	1.19614e-05	0.000163788	3.08259
RHBDD3	0.282081	-0.246852	4.8104	1.19744e-05	0.000163788	3.08156
ACAA2	-0.515624	1.68781	-4.81038	1.19749e-05	0.000163788	3.08152
ICAM2	1.00945	0.362464	4.80836	1.20606e-05	0.000164847	3.07475
DLC1	0.489588	-0.751334	4.80784	1.20827e-05	0.000165037	3.07301
CHST11	0.616751	-1.01856	4.80681	1.21268e-05	0.000165526	3.06955
CHN1	0.630552	-0.760288	4.8066	1.21357e-05	0.000165532	3.06886
PYCR1	0.475448	-0.854352	4.80578	1.21708e-05	0.000165898	3.06611
PSME4	0.289306	-0.530964	4.80318	1.2283e-05	0.000167312	3.0574
KRT6C	0.438971	0.220194	4.80172	1.23459e-05	0.000168055	3.05255
DUSP14	0.473862	-1.84513	4.79921	1.2456e-05	0.000169437	3.04412
HTD2	-0.199393	0.0999092	-4.79859	1.24828e-05	0.000169686	3.04208
SLTM	-0.220752	0.306603	-4.79793	1.25122e-05	0.00016997	3.03984
APOL4	0.401345	0.446513	4.79747	1.25323e-05	0.000170127	3.03832
SIK1	0.65983	-1.1446	4.79697	1.25542e-05	0.000170308	3.03666
IFT22	0.294935	-0.578966	4.79634	1.25822e-05	0.000170572	3.03454
LINC01615	0.225149	-0.0928614	4.79597	1.25986e-05	0.000170677	3.03331
TK2	0.268425	0.122306	4.79527	1.26298e-05	0.000170983	3.03096
IER5L	0.483723	-1.61311	4.79394	1.26889e-05	0.000171667	3.02653
REG1A	2.58523	3.8143	4.7936	1.27044e-05	0.00017176	3.02537
EDA	-0.376221	-0.332231	-4.79299	1.27317e-05	0.000172012	3.02333
IMMT	-0.310513	-0.0683102	-4.7922	1.27671e-05	0.000172373	3.0207
HSD3B1	-0.702826	0.487165	-4.79162	1.27933e-05	0.00017261	3.01875
CNKSR3	-0.665542	0.824103	-4.79072	1.28337e-05	0.000173037	3.01576
COA3	-0.295031	1.48752	-4.78964	1.28826e-05	0.000173579	3.01215
PDE4B	0.312683	-0.118107	4.78761	1.29749e-05	0.000174704	3.00537
AZGP1	0.803846	-0.665099	4.78684	1.30103e-05	0.000175062	3.00279
SFXN5	-0.24498	0.158943	-4.78622	1.30387e-05	0.000175312	3.00071
IL23A	1.52155	-0.248581	4.78605	1.30464e-05	0.000175312	3.00015
SP110	0.540785	1.18804	4.78572	1.30618e-05	0.000175375	2.99903
SULT1A2	-0.892348	1.82489	-4.78539	1.30769e-05	0.000175375	2.99794
DIO3	-0.980122	1.02124	-4.78537	1.30775e-05	0.000175375	2.99789
NTMT1	0.276165	-1.2107	4.78508	1.30912e-05	0.00017544	2.9969
TRAPPC6A	-0.470224	0.348636	-4.78488	1.31004e-05	0.000175445	2.99623
BAG2	0.693942	-2.28677	4.78445	1.31201e-05	0.000175591	2.9948
ZBTB3	-0.277893	0.716918	-4.78304	1.31853e-05	0.000176344	2.9901
CELSR1	0.414742	-0.536199	4.78199	1.32343e-05	0.000176882	2.98658
MYL6B	0.429938	-1.47251	4.78091	1.32847e-05	0.000177436	2.98297
DNAJB5	0.719087	-1.31195	4.78032	1.33121e-05	0.000177682	2.98102
MMP12	1.77732	4.34939	4.77964	1.33439e-05	0.000177987	2.97875
NXPE1	-0.899612	5.65829	-4.77752	1.34437e-05	0.000179198	2.97168
CD1B	0.407014	-0.864017	4.77593	1.35192e-05	0.000180084	2.96636
KIAA0895	0.205594	-0.166734	4.77504	1.35617e-05	0.00018053	2.96338
TNFSF9	0.285743	-0.473559	4.77399	1.36116e-05	0.000181072	2.9599
LCN2	2.08958	4.46717	4.77359	1.36312e-05	0.000181212	2.95853
ENSG00000245293	-0.506985	0.822211	-4.77157	1.37283e-05	0.000182382	2.95179
QRSL1	-0.198058	0.208441	-4.77087	1.37621e-05	0.000182708	2.94946
PLAGL1	-0.337934	0.825274	-4.77008	1.38e-05	0.000183089	2.94685
DEPP1	0.645905	-0.404034	4.76983	1.38126e-05	0.000183129	2.94598
CYTIP	0.829939	1.29223	4.76962	1.38226e-05	0.000183129	2.94529
LIF	0.20715	0.0683794	4.76945	1.38306e-05	0.000183129	2.94474
APOBEC3F	-0.522861	0.0378388	-4.76897	1.38541e-05	0.000183161	2.94313
ASGR1	0.584638	-4.27393	4.76894	1.38557e-05	0.000183161	2.94302
UXT	-0.202246	0.113513	-4.7687	1.38671e-05	0.000183161	2.94224
TM4SF18	0.519213	0.533622	4.76856	1.38743e-05	0.000183161	2.94175
PPP6C	-0.161316	0.298953	-4.76823	1.38902e-05	0.000183161	2.94066
APOO	-0.282707	-0.372747	-4.76809	1.38971e-05	0.000183161	2.94019
WIPF2	-0.285579	0.90451	-4.76807	1.38979e-05	0.000183161	2.94013
KIRREL1	0.241324	-0.775978	4.76789	1.39067e-05	0.000183161	2.93954
GJB1	-0.491913	1.55053	-4.76587	1.40057e-05	0.000184343	2.93281
PDCD4	-0.803008	2.722	-4.76545	1.40267e-05	0.000184498	2.93138
UBFD1	0.205913	-0.908725	4.76311	1.41424e-05	0.000185803	2.92359
SERPINA2	0.168623	0.0608723	4.76307	1.41446e-05	0.000185803	2.92344
MCOLN2	-0.894463	2.04483	-4.76119	1.42382e-05	0.000186909	2.91718
SLC52A3	-0.578737	2.5376	-4.75655	1.4472e-05	0.000189693	2.90172
SLC15A3	0.607928	1.86445	4.75642	1.44788e-05	0.000189693	2.90128
EHD3	0.361036	-0.242641	4.75641	1.44789e-05	0.000189693	2.90127
PSMB5	0.298976	-0.975939	4.75385	1.46096e-05	0.000191199	2.89274
HSPA13	0.417948	-0.492303	4.75379	1.4613e-05	0.000191199	2.89252
MAP3K10	0.349354	-0.39233	4.75346	1.46301e-05	0.000191297	2.89141
DAPP1	0.931692	1.3878	4.75191	1.47096e-05	0.000192104	2.88627
RASSF3	-0.236844	1.10265	-4.75166	1.47224e-05	0.000192104	2.88544
CRYL1	-0.607023	2.30035	-4.75155	1.47284e-05	0.000192104	2.88505
ENSG00000255471	0.223849	-0.208434	4.75151	1.47305e-05	0.000192104	2.88492
SLC4A4	-1.05018	3.68397	-4.7511	1.47516e-05	0.000192253	2.88356
SMIM8	-0.188069	0.233467	-4.75062	1.47764e-05	0.000192451	2.88197
CPNE2	-0.453858	1.42475	-4.75017	1.47997e-05	0.000192628	2.88047
CADM1	0.786353	-1.69977	4.74906	1.48576e-05	0.000193255	2.87677
ZNF75A	-0.181373	-0.0999621	-4.7468	1.49758e-05	0.000194666	2.86924
TRAPPC8	-0.180876	0.396503	-4.74528	1.50561e-05	0.000195582	2.86417
SLC16A5	-0.564219	2.19697	-4.74441	1.51019e-05	0.000196049	2.86129
LRRC32	0.628867	1.80997	4.74354	1.51484e-05	0.000196525	2.85837
HINT2	-0.271911	0.653601	-4.74252	1.52025e-05	0.000196983	2.85499
DDX19B	-0.205266	0.219542	-4.7425	1.52035e-05	0.000196983	2.85493
CLDN15	-0.422004	0.312912	-4.74203	1.52285e-05	0.000197177	2.85337
SHB	0.380662	0.329258	4.74154	1.52547e-05	0.000197389	2.85174
SOX9-AS1	-0.56592	0.738727	-4.74086	1.5291e-05	0.00019773	2.84948
TRPV2	0.771292	-1.09324	4.74007	1.53336e-05	0.000198152	2.84684
PKIA	0.602305	-0.995474	4.73919	1.53808e-05	0.000198633	2.84393
LMO4	0.547978	0.0545727	4.7385	1.54184e-05	0.00019899	2.84161
MPZL3	-0.508792	1.69148	-4.73795	1.54479e-05	0.000199241	2.8398
STT3A	0.40068	-0.166196	4.73734	1.54811e-05	0.000199496	2.83776
RPS3A	-0.249054	-0.135547	-4.73722	1.54878e-05	0.000199496	2.83735
CROT	-0.567849	0.761868	-4.73555	1.55785e-05	0.000200536	2.83181
BTN3A1	0.302629	0.463633	4.7344	1.56417e-05	0.000201218	2.82797
ARHGAP21	-0.20744	0.658804	-4.73372	1.56786e-05	0.000201564	2.82573
ACSF3	-0.298677	0.346986	-4.73341	1.56959e-05	0.000201655	2.82469
SH3BP5	0.655331	-0.931388	4.73315	1.57103e-05	0.00020171	2.82382
GCN1	0.305604	-0.90951	4.73174	1.57879e-05	0.000202576	2.81914
TRIM7	0.476857	0.0597143	4.73055	1.5854e-05	0.000203292	2.81518
TSC22D3	0.390146	0.225272	4.73024	1.58713e-05	0.000203384	2.81414
RNF24	0.141556	-0.413294	4.72972	1.59003e-05	0.000203624	2.81241
ADAM9	0.56785	0.643712	4.72949	1.59131e-05	0.000203657	2.81165
ZADH2	-0.280289	0.307114	-4.72794	1.6e-05	0.000204638	2.80648
SLC8A1	0.331987	0.852211	4.72765	1.60161e-05	0.000204711	2.80553
PTENP1	-0.299157	1.18504	-4.72719	1.60418e-05	0.000204908	2.80401
FCGR2A	0.610275	0.42423	4.72627	1.60939e-05	0.000205442	2.80093
KLHL29	0.367157	-0.085338	4.72533	1.61465e-05	0.00020596	2.79783
NET1	-0.553537	1.78352	-4.72518	1.61551e-05	0.00020596	2.79733
SNX10	0.718062	-1.63812	4.72424	1.62086e-05	0.000206509	2.79419
CHST2	0.88737	-0.364621	4.7222	1.63248e-05	0.000207818	2.78742
LPCAT1	0.255161	-0.380532	4.72207	1.63322e-05	0.000207818	2.78698
LINC01559	-0.688478	2.95266	-4.72187	1.63438e-05	0.000207832	2.78631
JAK2	0.403765	0.593506	4.72034	1.64316e-05	0.000208815	2.78123
HNF1A	-0.327261	1.03174	-4.71938	1.6487e-05	0.000209386	2.77804
PPARGC1B	-0.530224	1.68467	-4.71915	1.64999e-05	0.000209416	2.77729
SPATS2	0.200338	-0.189725	4.71874	1.65237e-05	0.000209532	2.77593
ADCY9	-0.388066	0.550806	-4.71863	1.653e-05	0.000209532	2.77556
SLC25A22	0.471782	-0.505888	4.71771	1.65833e-05	0.000210073	2.77251
TRIM69	0.57131	1.20633	4.71691	1.66301e-05	0.000210531	2.76984
P4HA3	0.327044	0.111714	4.71627	1.66671e-05	0.000210865	2.76773
LMO2	0.777933	-0.0720482	4.71581	1.6694e-05	0.000211072	2.7662
SCAPER	-0.253729	0.13584	-4.71472	1.67582e-05	0.000211702	2.76256
ATP5MC1	-0.387127	0.650356	-4.7146	1.67651e-05	0.000211702	2.76217
PHACTR4	-0.234487	0.14446	-4.71394	1.68037e-05	0.000212055	2.75999
SNX13	-0.346436	0.648186	-4.71361	1.68232e-05	0.000212166	2.75889
HSP90B1	0.746992	-0.0424078	4.71299	1.68596e-05	0.000212491	2.75684
PLEKHF1	0.355852	0.33001	4.71276	1.68732e-05	0.000212528	2.75607
ECSIT	-0.315658	0.51719	-4.71183	1.69281e-05	0.000213016	2.75299
NCF2	0.883984	2.49084	4.71175	1.69334e-05	0.000213016	2.7527
BMS1	0.23829	-0.465087	4.71082	1.69882e-05	0.000213562	2.74963
CEMIP	0.868779	-0.726197	4.7104	1.70133e-05	0.000213562	2.74823
SLC41A1	0.250925	-0.423219	4.71039	1.7014e-05	0.000213562	2.74819
MARS	0.358807	-0.946221	4.71029	1.70197e-05	0.000213562	2.74787
OXSM	-0.258915	0.203446	-4.70996	1.70398e-05	0.000213679	2.74676
SAP30L	-0.295496	1.25339	-4.70904	1.70944e-05	0.00021423	2.74372
CYB5R2	0.580819	-0.0374018	4.70843	1.71313e-05	0.000214483	2.74168
SEMG1	0.706774	0.555771	4.70834	1.71362e-05	0.000214483	2.7414
GAPLINC	0.575107	-0.624499	4.70744	1.71906e-05	0.000215028	2.7384
SLC36A4	0.386472	-0.699691	4.70683	1.72273e-05	0.000215352	2.73637
PAM	0.416867	-0.297208	4.70557	1.73032e-05	0.000216165	2.7322
NPR1	0.352443	-0.752114	4.70508	1.73331e-05	0.000216403	2.73057
CCL4	1.20471	3.46535	4.70415	1.73897e-05	0.000216973	2.72747
CDX2	-0.582802	3.67821	-4.70313	1.74513e-05	0.000217605	2.72412
PSME2	0.654811	1.12336	4.70288	1.74667e-05	0.000217661	2.72329
HCAR3	1.64581	0.521621	4.70238	1.74971e-05	0.000217899	2.72163
IDO1	1.94451	1.3563	4.70221	1.75077e-05	0.000217899	2.72106
S100A2	0.972287	-0.527384	4.70126	1.7566e-05	0.000218488	2.71791
LCMT1	-0.263732	0.268801	-4.70058	1.7608e-05	0.000218874	2.71564
RIPOR1	0.244077	-0.218628	4.70031	1.76245e-05	0.000218942	2.71475
CYP27B1	0.304094	-0.165506	4.69916	1.76958e-05	0.000219691	2.71092
FCGR1B	0.893689	1.25388	4.6987	1.7724e-05	0.000219904	2.70941
CMTM7	0.518471	-0.57578	4.69708	1.78248e-05	0.000220932	2.70404
EIF3L	-0.307218	-0.2365	-4.69701	1.78291e-05	0.000220932	2.70381
SEC14L1	0.475177	-0.0194697	4.69681	1.78413e-05	0.000220946	2.70316
UQCRC1	-0.413324	0.949376	-4.6964	1.78672e-05	0.000221129	2.70178
LPAR5	-0.303922	1.62571	-4.69539	1.79303e-05	0.000221772	2.69844
ZNF124	-0.399703	-0.274355	-4.69407	1.80132e-05	0.000222659	2.69406
TMEM260	-0.263577	0.5903	-4.69348	1.80503e-05	0.000222978	2.69212
SUB1	0.376024	-0.33745	4.69314	1.80716e-05	0.000223103	2.691
ASAP3	-0.433426	0.659157	-4.69257	1.81082e-05	0.000223417	2.68908
LOC100506125	-0.51476	2.246	-4.69209	1.81386e-05	0.000223653	2.68749
HLX	0.350322	0.120081	4.69084	1.82177e-05	0.000224489	2.68336
OGFR	0.384324	0.466469	4.68846	1.83701e-05	0.000226227	2.67546
TNIP3	1.88139	1.54159	4.68669	1.8484e-05	0.000227489	2.6696
METTL6	0.260135	-1.02596	4.68606	1.85247e-05	0.000227849	2.66752
HGF	0.282139	-0.409195	4.68571	1.8547e-05	0.000227919	2.66637
PRAM1	0.383696	0.813144	4.68562	1.85533e-05	0.000227919	2.66605
MNT	0.279582	0.0896804	4.68454	1.86231e-05	0.000228636	2.66249
GNAI2	0.402222	-0.463761	4.68361	1.86837e-05	0.000229165	2.65941
MAGED4B	0.604917	-2.27718	4.68352	1.86893e-05	0.000229165	2.65913
KIFAP3	-0.434892	0.710185	-4.6818	1.88023e-05	0.000230409	2.65341
LIMCH1	0.388407	-0.956519	4.67968	1.89421e-05	0.000231979	2.64639
COL23A1	0.610548	0.17537	4.67905	1.89834e-05	0.000232343	2.64432
CSNK1E	0.275466	-0.756244	4.67699	1.91208e-05	0.000233881	2.63748
PKM	0.474717	-1.47341	4.67571	1.92065e-05	0.000234784	2.63325
LIX1L	0.356872	-0.685109	4.675	1.9254e-05	0.000235221	2.6309
RLIM	0.305708	-0.606085	4.67423	1.93055e-05	0.000235705	2.62837
ANKS4B	-0.453825	1.51035	-4.67143	1.94949e-05	0.000237766	2.61911
S1PR1	0.810257	1.32711	4.67138	1.94983e-05	0.000237766	2.61895
IL1R2	-0.655948	4.30064	-4.66953	1.96251e-05	0.000239167	2.6128
SEMA4C	0.332357	-1.08843	4.66919	1.96482e-05	0.000239301	2.61169
VMO1	0.622216	1.12878	4.66828	1.97103e-05	0.000239911	2.6087
CD109	0.446328	-1.72388	4.66802	1.97281e-05	0.000239935	2.60784
SMPDL3A	-0.760396	3.47093	-4.6679	1.97364e-05	0.000239935	2.60744
ZDHHC7	-0.359597	0.630181	-4.66723	1.97831e-05	0.000240356	2.6052
SSTR2	-0.534364	0.54942	-4.66704	1.97963e-05	0.00024037	2.60457
USP48	0.215628	-0.425588	4.66639	1.98411e-05	0.000240767	2.60242
CCNI	0.257903	-0.0760978	4.66485	1.99478e-05	0.000241897	2.59734
PLXNA1	0.24539	-0.523291	4.66462	1.99635e-05	0.000241897	2.59659
MCRIP1	0.427496	-0.537272	4.66452	1.99707e-05	0.000241897	2.59625
JMJD4	0.253741	-0.529682	4.66363	2.00325e-05	0.000242498	2.59332
MT-CYB	-0.606343	2.01172	-4.66337	2.00514e-05	0.000242579	2.59243
LDHD	-0.830325	2.74089	-4.66273	2.00955e-05	0.000242965	2.59035
CDC42BPG	-0.348859	1.29108	-4.66185	2.01576e-05	0.000243568	2.58742
HSD17B8	-0.326107	0.315808	-4.66151	2.01817e-05	0.000243712	2.58629
FAM20C	0.513687	-1.96812	4.66063	2.02431e-05	0.000244305	2.58341
RFLNB	0.522203	-0.256956	4.65973	2.03073e-05	0.00024493	2.58041
SERPINB7	1.471	0.625322	4.65945	2.03269e-05	0.000244993	2.57949
IQSEC1	0.201066	-0.147792	4.65924	2.03415e-05	0.000244993	2.57881
TSTD2	-0.273432	0.11755	-4.65913	2.03494e-05	0.000244993	2.57845
ABHD14B	-0.251355	0.586578	-4.65856	2.03903e-05	0.000245337	2.57654
TRAF3IP2	-0.299155	0.951678	-4.6583	2.04089e-05	0.000245413	2.57568
ENKD1	0.311746	-1.01804	4.65746	2.04683e-05	0.000245978	2.57292
ENC1	0.474957	0.10679	4.65655	2.05336e-05	0.000246614	2.5699
ERICH2	0.390193	-0.592674	4.65558	2.0603e-05	0.000247298	2.5667
HSPB2-C11orf52	-0.555201	1.57858	-4.65539	2.06167e-05	0.000247314	2.56607
LRWD1	0.297266	-0.855739	4.65473	2.06641e-05	0.000247704	2.5639
BECN1	-0.236552	0.977981	-4.65459	2.06741e-05	0.000247704	2.56344
GBP4	1.02233	1.97704	4.65322	2.07733e-05	0.000248742	2.5589
NME7	0.339651	-1.03268	4.65272	2.08095e-05	0.000249026	2.55725
ZFAND2B	-0.341246	1.51997	-4.65234	2.0837e-05	0.000249205	2.556
PNOC	1.25001	1.64462	4.65155	2.08944e-05	0.000249742	2.55339
MRPS22	-0.259036	-0.057609	-4.65065	2.09603e-05	0.000250378	2.55041
ARFGAP1	0.174499	-0.315387	4.64994	2.10117e-05	0.000250779	2.54809
CATSPERB	0.569333	0.92472	4.64984	2.10191e-05	0.000250779	2.54775
UQCRFS1	-0.370029	0.948334	-4.64823	2.11375e-05	0.000252042	2.54243
BCL2L10	-0.402652	1.06754	-4.64704	2.12253e-05	0.000252937	2.5385
HINT1	-0.280005	0.426013	-4.64515	2.13651e-05	0.000254451	2.53228
WDR81	0.28921	0.0746071	4.64465	2.14025e-05	0.000254743	2.53062
ADAM19	0.540527	0.666306	4.6425	2.15636e-05	0.000256507	2.52351
PCSK9	1.34268	-0.806141	4.64173	2.16212e-05	0.000257039	2.52098
UQCC3	-0.249455	0.029974	-4.64108	2.16701e-05	0.000257467	2.51884
CSGALNACT2	0.299852	-0.055969	4.64085	2.16875e-05	0.00025752	2.51808
MRGBP	0.235904	-1.0763	4.63944	2.17939e-05	0.000258629	2.51344
DNAJA3	-0.321966	-0.515211	-4.63819	2.18889e-05	0.000259601	2.50932
ANXA2	0.642638	1.06506	4.63694	2.19844e-05	0.000260516	2.5052
FAM171A1	-0.328496	1.05705	-4.63684	2.19922e-05	0.000260516	2.50486
LINC01003	-0.449922	-0.124674	-4.63621	2.20404e-05	0.000260931	2.50279
RAB11FIP5	0.322203	-0.245078	4.63597	2.20588e-05	0.000260994	2.502
DHRS4-AS1	-0.336001	0.825987	-4.6354	2.21025e-05	0.000261356	2.50012
ACOT9	0.413929	-0.280011	4.63509	2.21265e-05	0.000261484	2.49909
PHF7	-0.18256	0.330527	-4.63184	2.2378e-05	0.000264299	2.48838
EMID1	0.444867	0.950993	4.63058	2.24766e-05	0.000265307	2.48421
LRPPRC	-0.370743	-0.213475	-4.62974	2.25422e-05	0.000265923	2.48145
OSBPL10	0.296946	0.160428	4.62934	2.25737e-05	0.000266137	2.48013
NEURL2	-0.272473	0.177566	-4.62912	2.2591e-05	0.000266183	2.47941
GMFB	-0.261336	0.777584	-4.62868	2.26251e-05	0.000266428	2.47797
SCN9A	-0.270969	0.0969203	-4.62843	2.26451e-05	0.000266505	2.47714
MOGAT2	-0.529877	2.97378	-4.62787	2.26895e-05	0.00026687	2.47528
ZNF397	-0.234477	0.434859	-4.62742	2.27251e-05	0.000266997	2.4738
CACNB1	-0.503497	0.805881	-4.62732	2.27326e-05	0.000266997	2.47349
HOXB5	-0.604092	2.03604	-4.62722	2.27406e-05	0.000266997	2.47315
SLC15A4	0.216813	-0.547545	4.62554	2.2874e-05	0.000268406	2.46761
MT-ND4	-0.562289	1.29139	-4.62485	2.29285e-05	0.000268887	2.46535
GJA1	0.494292	-0.325995	4.62425	2.2977e-05	0.000269297	2.46335
NRN1	0.396759	-1.65544	4.62181	2.31727e-05	0.00027143	2.45531
ERG	0.200639	0.0595752	4.62015	2.33062e-05	0.000272834	2.44987
ATXN7L3B	-0.211382	0.279483	-4.61965	2.33467e-05	0.000273147	2.44823
PLCB1	0.426319	-1.54427	4.61691	2.35701e-05	0.000275485	2.4392
UGT1A6	-0.931913	3.41557	-4.61674	2.35843e-05	0.000275485	2.43863
ARMCX2	0.623977	-1.44922	4.61669	2.3588e-05	0.000275485	2.43848
SELENOM	0.702088	1.57291	4.61419	2.37938e-05	0.000277724	2.43026
CA7	-0.825008	1.88422	-4.61326	2.38714e-05	0.000278467	2.42717
NBEAL2	0.261489	0.320515	4.61293	2.38987e-05	0.000278622	2.42609
NETO2	-1.00858	-0.91792	-4.61271	2.39164e-05	0.000278666	2.42538
C4BPA	1.68636	0.520269	4.61173	2.39979e-05	0.000279451	2.42216
FKBP4	-0.202756	-0.804172	-4.61127	2.40367e-05	0.000279591	2.42063
SEL1L3	0.368784	2.36854	4.61125	2.4038e-05	0.000279591	2.42058
SFXN4	-0.288242	0.249836	-4.61091	2.40668e-05	0.000279674	2.41945
PTPRR	-0.89461	2.16918	-4.61083	2.40733e-05	0.000279674	2.41919
ZNF275	0.241724	-0.0743233	4.60921	2.42092e-05	0.000281089	2.41386
LINC01399	-0.445839	0.923372	-4.60859	2.42612e-05	0.000281529	2.41183
ST7	0.201113	-0.011765	4.60628	2.44568e-05	0.000283633	2.40422
S100P	1.49874	2.11705	4.60583	2.44947e-05	0.000283908	2.40275
CKLF	0.308169	-0.163049	4.60539	2.45321e-05	0.000284175	2.40131
SLC20A1	-0.755261	-0.289937	-4.60438	2.46183e-05	0.000284692	2.39798
MAP4K4	0.246695	-1.13527	4.60421	2.46325e-05	0.000284692	2.39744
NDUFA2	-0.311346	0.790191	-4.6042	2.46336e-05	0.000284692	2.3974
LANCL3	-0.401265	0.707548	-4.6042	2.4634e-05	0.000284692	2.39738
LY6E	0.375754	-1.40088	4.60313	2.47256e-05	0.000285585	2.39387
CACNB2	-0.183785	0.450088	-4.60247	2.47821e-05	0.000286072	2.3917
ZYX	0.424563	-0.143548	4.6022	2.48053e-05	0.000286139	2.39081
TMEM120A	-0.379381	1.23955	-4.60207	2.48167e-05	0.000286139	2.39038
AFAP1L1	0.259011	-0.515955	4.60146	2.48693e-05	0.00028658	2.38838
RGS14	0.269217	-0.0439116	4.59973	2.50188e-05	0.000288136	2.3827
THAP4	-0.261787	0.544904	-4.5989	2.50912e-05	0.000288803	2.37996
ADM	1.07764	0.0680742	4.59861	2.51161e-05	0.000288922	2.37902
MAVS	-0.313563	0.0197481	-4.59795	2.51742e-05	0.000289423	2.37683
SLC9A7	0.255651	-0.429281	4.5974	2.52215e-05	0.0002898	2.37505
TRMT9B	-0.210155	0.302281	-4.59499	2.5434e-05	0.000292002	2.36711
C5orf52	-0.440901	1.22593	-4.59489	2.54425e-05	0.000292002	2.36679
GLOD5	-0.538964	2.33571	-4.59403	2.55184e-05	0.000292704	2.36397
TCEA3	-0.60388	2.94584	-4.59362	2.55545e-05	0.00029295	2.36263
TTC7B	0.224097	-0.927961	4.59311	2.55996e-05	0.000293298	2.36096
MARC2	-0.388915	1.47883	-4.59266	2.564e-05	0.000293592	2.35947
FMO3	0.214345	0.188169	4.59235	2.56675e-05	0.000293737	2.35845
HEATR5A	-0.435136	0.837621	-4.59141	2.57517e-05	0.000294531	2.35535
FYN	0.604177	-0.533686	4.59117	2.57723e-05	0.000294598	2.35459
CACNA2D4	-0.279186	-0.303033	-4.59093	2.57942e-05	0.000294679	2.35379
BBX	0.284363	-0.825349	4.59014	2.58648e-05	0.000295315	2.3512
FAM117B	-0.324118	0.492806	-4.58901	2.59662e-05	0.000296303	2.34749
ACKR4	1.03366	1.37406	4.58884	2.59815e-05	0.000296308	2.34694
GPBP1L1	-0.334019	1.02315	-4.58865	2.59991e-05	0.000296339	2.3463
DPCD	0.349963	-0.0772909	4.58731	2.61196e-05	0.000297542	2.34191
SHISA4	0.41495	-0.911173	4.58675	2.6171e-05	0.000297957	2.34005
IFITM4P	0.876282	0.845983	4.58513	2.63177e-05	0.000299456	2.33476
CBX4	0.242404	-0.643993	4.58454	2.63721e-05	0.000299903	2.3328
PSMC2	0.362543	-0.840504	4.58387	2.64328e-05	0.000300422	2.33063
CX3CL1	0.373696	-0.109217	4.58278	2.65332e-05	0.000301391	2.32704
SPRY3	-0.170317	0.355804	-4.5811	2.66877e-05	0.000302973	2.32154
CTNNAL1	0.537203	-2.33858	4.58055	2.67386e-05	0.000303211	2.31973
CLEC4E	1.22358	1.37489	4.58055	2.67391e-05	0.000303211	2.31972
ITGB1BP1	0.159263	-0.503876	4.57917	2.68668e-05	0.000304375	2.3152
MYCT1	0.463943	0.947581	4.57911	2.68724e-05	0.000304375	2.31501
ALCAM	0.169596	-0.464417	4.57853	2.69268e-05	0.000304818	2.31309
GFPT2	0.514877	-1.6053	4.57634	2.71316e-05	0.000306907	2.30592
SBSPON	0.364084	-0.71391	4.57623	2.71421e-05	0.000306907	2.30555
DEPDC7	-0.787395	0.104299	-4.57564	2.71975e-05	0.000307358	2.30362
CNTFR	-0.545275	0.311676	-4.57384	2.73679e-05	0.000309109	2.2977
KRTCAP2	0.28074	0.0915784	4.57018	2.77169e-05	0.000312866	2.28571
MME	0.314614	-0.599064	4.57002	2.77321e-05	0.000312866	2.28519
CCL3	0.929058	2.15271	4.56839	2.78885e-05	0.000314453	2.27986
EIF3K	-0.219487	0.467304	-4.56684	2.80382e-05	0.000315962	2.27479
NSG1	0.356889	0.00107937	4.56515	2.82035e-05	0.000317645	2.26923
SMARCA1	0.465646	-2.3929	4.56437	2.82789e-05	0.000318314	2.2667
LSAMP	0.504158	-1.06298	4.5638	2.83354e-05	0.000318769	2.26481
AKR1B10	-0.772349	3.89643	-4.56303	2.84108e-05	0.000319437	2.2623
DUSP7	0.274891	0.0848359	4.5621	2.85023e-05	0.00032011	2.25925
GALNT2	0.420134	-0.490551	4.56209	2.85028e-05	0.00032011	2.25923
LYPD6B	0.64103	0.30315	4.55894	2.88152e-05	0.000323436	2.24891
TMC6	0.374112	-0.259191	4.55785	2.89241e-05	0.000324475	2.24534
SOCS1	0.670775	0.537963	4.55725	2.89846e-05	0.000324952	2.24337
ENDOV	-0.394677	0.224685	-4.5571	2.89993e-05	0.000324952	2.24288
IGHV1-69	1.17215	3.04307	4.55581	2.91293e-05	0.000325919	2.23865
SAA3P	0.442791	0.192277	4.55567	2.91435e-05	0.000325919	2.23819
EDN1	-0.758555	1.76645	-4.55565	2.91449e-05	0.000325919	2.23814
PCBD2	-0.222282	0.34596	-4.55559	2.91511e-05	0.000325919	2.23794
MORC4	0.369247	0.222907	4.55527	2.91832e-05	0.000326071	2.2369
TLR1	0.528072	1.03117	4.55502	2.92088e-05	0.000326071	2.23607
MMP2	0.47845	-0.208532	4.55497	2.92139e-05	0.000326071	2.23591
CD81	0.484755	-0.347198	4.5538	2.93324e-05	0.000327211	2.23207
FER	0.19881	-0.499934	4.55125	2.9592e-05	0.000329922	2.22373
CD93	0.637011	1.48162	4.55061	2.96575e-05	0.000330467	2.22164
EFEMP2	0.552021	-0.701102	4.54964	2.97571e-05	0.000331391	2.21847
SNX4	-0.354555	0.939775	-4.54707	3.00216e-05	0.00033415	2.21009
EPB41L3	-0.600021	0.567625	-4.54679	3.00516e-05	0.000334297	2.20914
CCDC88B	0.640754	1.4648	4.54628	3.01044e-05	0.000334697	2.20748
DFFA	0.182346	-0.68242	4.54535	3.02011e-05	0.000335584	2.20445
VASH1	0.361765	0.391429	4.54499	3.02389e-05	0.000335817	2.20326
SNX15	-0.204596	0.233715	-4.54449	3.02911e-05	0.000336209	2.20163
LINC00302	-0.233174	0.337061	-4.54242	3.05079e-05	0.000338261	2.19488
SCYL3	-0.257138	1.01312	-4.5424	3.05099e-05	0.000338261	2.19482
SOD2	0.62358	0.218864	4.54093	3.06653e-05	0.000339794	2.19001
MARVELD3	-0.61811	2.36494	-4.53995	3.07699e-05	0.000340764	2.18678
NMU	0.65105	-3.74846	4.53956	3.0811e-05	0.000340899	2.18552
SYT17	-0.471871	0.534975	-4.53951	3.08164e-05	0.000340899	2.18536
GNA11	-0.633575	2.04313	-4.53845	3.09287e-05	0.000341951	2.18191
VKORC1	0.290667	-1.57142	4.53738	3.10436e-05	0.000343031	2.1784
NCBP1	-0.233219	-0.157259	-4.53653	3.11351e-05	0.000343773	2.17562
RETSAT	-0.734407	1.92701	-4.53643	3.11453e-05	0.000343773	2.17531
RHBDD1	0.241466	0.875014	4.53598	3.11939e-05	0.000344118	2.17383
CSF3	0.628138	0.419492	4.53554	3.12411e-05	0.000344448	2.1724
TSHZ1	-0.428918	0.741292	-4.53387	3.14217e-05	0.000346248	2.16695
RTL8C	0.241484	-0.435491	4.53294	3.15228e-05	0.000347003	2.16391
C1QTNF5	0.63323	1.67876	4.53292	3.15251e-05	0.000347003	2.16384
CES3	-0.483214	2.09147	-4.53245	3.15764e-05	0.000347354	2.1623
DCUN1D5	0.451831	-1.90879	4.53225	3.15981e-05	0.000347354	2.16165
IGLC2	1.54182	0.945947	4.53199	3.16263e-05	0.000347354	2.1608
ITGB3	0.150237	-0.291592	4.53199	3.16268e-05	0.000347354	2.16079
PXDC1	0.35702	-0.235014	4.53178	3.16489e-05	0.000347405	2.16013
ANXA3	0.691962	1.58064	4.53097	3.17378e-05	0.000348188	2.15747
PDIA6	0.500678	-0.208601	4.53039	3.18018e-05	0.000348699	2.15557
CPT1C	0.510395	-1.25512	4.53021	3.18208e-05	0.000348715	2.155
AK3	-0.41543	0.98882	-4.52925	3.19268e-05	0.000349683	2.15186
NR3C2	-0.554311	3.88048	-4.52831	3.20301e-05	0.000350622	2.1488
NRAV	0.365003	0.5272	4.52729	3.21435e-05	0.000351671	2.14545
LUM	0.777015	0.379281	4.52667	3.22118e-05	0.000352223	2.14345
IQCG	0.299449	0.0538354	4.52571	3.23194e-05	0.000353207	2.14029
PWWP2B	-0.404149	1.64213	-4.5245	3.24544e-05	0.000354331	2.13634
DISC1	0.130029	-0.0130356	4.52447	3.2458e-05	0.000354331	2.13624
RNF128	-0.659584	2.47178	-4.52417	3.24909e-05	0.000354397	2.13528
ARHGDIB	0.850044	-0.164427	4.52409	3.24996e-05	0.000354397	2.13503
ATP5ME	-0.299147	1.08953	-4.52393	3.25174e-05	0.000354397	2.13451
SLC9A2	-0.46018	0.896446	-4.52365	3.25488e-05	0.000354545	2.1336
DCTD	0.237577	-0.104388	4.52331	3.25871e-05	0.000354768	2.13248
DERL3	1.06353	1.30273	4.52288	3.26356e-05	0.000355102	2.13108
ZNF700	-0.201561	0.0151716	-4.51713	3.32888e-05	0.000362011	2.11232
MCF2L-AS1	-0.391925	0.625047	-4.51679	3.33286e-05	0.000362246	2.11119
NR4A1	0.481396	-0.227117	4.51652	3.33587e-05	0.000362375	2.11034
DERL1	0.31883	0.392951	4.51381	3.3672e-05	0.000365579	2.1015
TRIP6	0.40176	-1.00624	4.51164	3.39242e-05	0.000368117	2.09443
FPR2	0.771902	0.577046	4.51123	3.39725e-05	0.00036844	2.09309
LILRB3	0.879517	1.95752	4.51059	3.40474e-05	0.000369051	2.09101
KCTD20	0.273082	-0.947141	4.50997	3.41207e-05	0.000369632	2.08897
GPR68	0.484805	0.284691	4.50982	3.41382e-05	0.000369632	2.08849
TOE1	-0.293136	-0.198553	-4.5077	3.43878e-05	0.000372132	2.08159
SHANK2-AS3	0.46005	0.869358	4.5075	3.4412e-05	0.000372192	2.08093
STC1	0.318697	-0.555924	4.50666	3.45112e-05	0.000373062	2.0782
PKDCC	-0.694431	0.28213	-4.50592	3.45995e-05	0.000373814	2.07579
IYD	-0.708854	2.8303	-4.50346	3.48937e-05	0.000376788	2.06778
FAM189B	0.219867	-0.954394	4.50258	3.5e-05	0.00037773	2.0649
PARP8	0.482433	0.562674	4.50185	3.50876e-05	0.000378471	2.06253
TMEM204	0.822803	2.7584	4.50138	3.51443e-05	0.000378877	2.06101
CLEC4D	0.542257	0.100011	4.49943	3.53805e-05	0.000381217	2.05467
SMKR1	0.315967	-0.994986	4.49769	3.55933e-05	0.000383302	2.049
ARPC1B	0.530888	-0.0206035	4.4969	3.56897e-05	0.000384105	2.04644
IRF1	0.509872	1.97559	4.49677	3.57065e-05	0.000384105	2.046
STAT1	0.731915	1.13698	4.4966	3.57276e-05	0.000384125	2.04544
AKIRIN2	0.362885	0.293659	4.49563	3.58462e-05	0.000384984	2.0423
LZTS3	0.403581	-0.0945502	4.49563	3.58462e-05	0.000384984	2.0423
SLC38A5	0.466332	-1.1343	4.49434	3.60059e-05	0.000386491	2.0381
GIPC2	-0.477754	2.14951	-4.49358	3.61e-05	0.000387292	2.03563
TRAM1	0.38367	0.632615	4.49277	3.6201e-05	0.000388166	2.03298
ASAP1	0.207893	-0.428146	4.49118	3.63988e-05	0.000390076	2.02783
MMP10	1.55308	1.30249	4.48909	3.66618e-05	0.000392559	2.02102
GFM2	-0.207658	-0.345749	-4.48902	3.66699e-05	0.000392559	2.02081
LAYN	0.33619	0.0231767	4.48764	3.68445e-05	0.000394162	2.01632
TLE2	-0.642179	0.87257	-4.48753	3.68592e-05	0.000394162	2.01594
TMEM220	-0.923352	2.87906	-4.48714	3.69076e-05	0.000394468	2.0147
MPDZ	0.381142	-1.37531	4.48672	3.6961e-05	0.000394685	2.01334
PGM1	-0.515783	0.0243327	-4.48667	3.69676e-05	0.000394685	2.01316
SULT1A1	-0.701232	1.45297	-4.4859	3.70662e-05	0.000395525	2.01065
HIKESHI	0.362662	-0.870074	4.48559	3.71049e-05	0.000395726	2.00966
PRR29	0.243019	-0.257071	4.48526	3.71473e-05	0.000395965	2.00858
BCLAF3	-0.30227	0.861584	-4.48386	3.73263e-05	0.000397661	2.00403
DPY19L1	0.293209	-0.296929	4.48231	3.75261e-05	0.000399575	1.99899
POLD3	0.314872	-0.386563	4.48211	3.75517e-05	0.000399635	1.99834
IGHV4-59	1.1959	2.95116	4.48065	3.77402e-05	0.000401426	1.9936
LDHB	0.435488	-2.02997	4.47923	3.79253e-05	0.00040318	1.98898
AP1M1	0.286548	-1.05911	4.47659	3.8271e-05	0.000406602	1.9804
PNKD	-0.285045	1.07418	-4.47645	3.82881e-05	0.000406602	1.97997
C6	-0.150453	0.14885	-4.47606	3.83403e-05	0.000406939	1.97869
TSHZ3	0.596572	1.03396	4.47473	3.85155e-05	0.00040858	1.97437
TCTN1	0.20858	-0.607006	4.47379	3.864e-05	0.000409683	1.97132
C1orf131	-0.161944	0.131301	-4.47297	3.87493e-05	0.000410618	1.96865
CYP7B1	0.32807	0.279278	4.47278	3.87747e-05	0.000410618	1.96803
DGKD	-0.460066	1.02152	-4.47266	3.87901e-05	0.000410618	1.96766
FERMT2	0.384713	-1.04756	4.47227	3.8842e-05	0.000410948	1.96639
UBE2J1	0.57199	0.888984	4.47194	3.88862e-05	0.000411198	1.96532
STPG1	-0.375299	1.05634	-4.4716	3.89313e-05	0.000411456	1.96422
FZD10	0.848735	-2.04456	4.47109	3.89994e-05	0.000411936	1.96257
COQ5	-0.286176	0.276404	-4.47095	3.90181e-05	0.000411936	1.96212
C1QTNF1	0.144457	0.154279	4.47026	3.91111e-05	0.000412699	1.95986
SNPH	0.740846	-0.43075	4.46999	3.91472e-05	0.000412861	1.95899
PLVAP	0.578613	1.51628	4.46772	3.9453e-05	0.000415866	1.95163
TOMM40L	-0.28538	0.238186	-4.46729	3.95119e-05	0.00041626	1.95022
TMEM121	0.661893	-2.44932	4.46714	3.95323e-05	0.00041626	1.94974
WWC2	0.186948	-0.669455	4.46662	3.96021e-05	0.000416775	1.94807
SPRYD3	0.175808	0.552618	4.466	3.96869e-05	0.000417447	1.94604
SLC66A1L	0.470081	0.310393	4.46551	3.97542e-05	0.000417934	1.94444
ZG16B	0.858782	3.38145	4.46532	3.97799e-05	0.000417982	1.94383
CASC15	0.2914	-1.22838	4.46364	4.00097e-05	0.000420176	1.93839
TNFRSF8	0.803242	-1.94326	4.46299	4.00987e-05	0.000420889	1.93628
S100A4	0.767298	-1.50598	4.46211	4.02195e-05	0.000421804	1.93344
PDZD2	0.31258	-0.267285	4.46205	4.02283e-05	0.000421804	1.93323
CGN	-0.511917	2.69708	-4.46139	4.03193e-05	0.000422536	1.9311
TRPM6	-0.558281	0.718913	-4.46004	4.05064e-05	0.000424248	1.92672
PITPNB	0.28483	-0.27044	4.4599	4.05254e-05	0.000424248	1.92628
TALDO1	0.237235	0.155127	4.45773	4.08286e-05	0.000427197	1.91923
BTG2	0.458998	1.14238	4.45755	4.08534e-05	0.000427233	1.91866
PRR15L	-0.569027	5.27484	-4.45625	4.10358e-05	0.000428915	1.91444
COX15	-0.193856	-0.0454639	-4.45551	4.11404e-05	0.000429783	1.91204
RIMS4	-0.23676	-0.189397	-4.45462	4.12661e-05	0.00043087	1.90915
MAMDC4	-0.399396	0.46268	-4.45435	4.1305e-05	0.000431049	1.90826
MCUB	0.662058	-0.110361	4.45377	4.13862e-05	0.00043146	1.90641
SRM	0.427062	-1.41907	4.45376	4.13878e-05	0.00043146	1.90637
ZNF439	-0.506683	-0.0681131	-4.45275	4.1531e-05	0.000432727	1.90311
REPIN1	-0.297186	0.281211	-4.45176	4.16729e-05	0.000433801	1.89988
VPS13C	0.200952	0.50004	4.45172	4.16777e-05	0.000433801	1.89977
GARS	0.326123	-0.895718	4.45034	4.18752e-05	0.00043563	1.8953
KRBA1	0.553642	-2.35846	4.44965	4.19751e-05	0.000436422	1.89305
SDR16C5	0.919784	2.70907	4.44941	4.20097e-05	0.000436422	1.89227
COX7C	-0.315213	0.859215	-4.44923	4.20353e-05	0.000436422	1.8917
FBXO34	-0.275925	1.39721	-4.4492	4.20392e-05	0.000436422	1.89161
SASH1	0.35773	0.0783993	4.44836	4.21605e-05	0.000437454	1.88888
PARP16	-0.216175	-0.480042	-4.44641	4.24434e-05	0.00044016	1.88256
PELI2	-0.538859	0.576201	-4.44428	4.27541e-05	0.000443151	1.87567
MGST3	-0.401418	1.97096	-4.44369	4.28404e-05	0.000443597	1.87376
TPD52L1	0.671318	-1.12552	4.44368	4.28417e-05	0.000443597	1.87373
SLC25A4	-0.322923	-0.0373306	-4.44279	4.29726e-05	0.000444721	1.87085
POLR3D	0.218134	-0.445906	4.44233	4.30406e-05	0.000445193	1.86935
NRG1	0.238561	-0.11905	4.44175	4.31256e-05	0.000445643	1.86749
LRRCC1	-0.298111	0.359322	-4.44173	4.31289e-05	0.000445643	1.86742
TAF4	-0.224344	-0.167073	-4.44013	4.33652e-05	0.000447852	1.86225
FAIM	0.269136	0.104457	4.43943	4.34704e-05	0.000448706	1.85996
PLEKHO1	0.76435	0.0513598	4.43873	4.35738e-05	0.00044954	1.85772
MT1JP	-1.73218	2.6474	-4.43765	4.37349e-05	0.000450968	1.85423
IRF4	0.556251	0.0909167	4.43709	4.38192e-05	0.000451603	1.85241
NECTIN4	0.357908	0.296241	4.43403	4.42798e-05	0.000455985	1.84253
IL1RAP	0.158333	-0.324167	4.43397	4.42901e-05	0.000455985	1.84231
USP8	-0.249645	0.282522	-4.43359	4.43467e-05	0.000456331	1.8411
PDLIM4	0.696489	-1.58632	4.433	4.44369e-05	0.000457023	1.83918
ADAMTS5	0.802551	0.786088	4.43209	4.45748e-05	0.000458205	1.83625
STAB2	-0.515515	0.988111	-4.43089	4.47587e-05	0.000459857	1.83236
MARVELD2	-0.391904	2.18038	-4.43052	4.48159e-05	0.000460207	1.83116
GOLT1A	-0.442905	0.410441	-4.42935	4.49953e-05	0.000461811	1.82738
IL1R1	0.39255	0.685026	4.42857	4.51146e-05	0.000462696	1.82488
SPATA2	-0.264151	0.633677	-4.42849	4.51281e-05	0.000462696	1.8246
DCAF12	-0.169459	0.262878	-4.42832	4.51532e-05	0.000462716	1.82407
B4GALNT2	-0.627204	0.640015	-4.42694	4.53671e-05	0.000464668	1.8196
NAMPT	0.845124	0.0553133	4.42669	4.54058e-05	0.000464826	1.8188
ASS1P2	0.910548	1.17921	4.42535	4.56148e-05	0.000466725	1.81446
EGR1	1.59867	-1.39965	4.42474	4.57099e-05	0.000467458	1.81249
BNC2	0.328296	-0.728303	4.42396	4.58311e-05	0.000468456	1.80999
AP5M1	-0.361251	1.03811	-4.42282	4.60107e-05	0.000469909	1.80629
CA9	0.399244	-3.08871	4.42276	4.60204e-05	0.000469909	1.80609
C2CD2L	-0.311591	0.625077	-4.4224	4.60774e-05	0.000470249	1.80493
C2orf70	0.540029	0.758968	4.42156	4.62093e-05	0.000471333	1.80222
KCNV1	-0.391715	0.396901	-4.42133	4.62451e-05	0.000471333	1.80149
KRT17	0.620485	-2.23547	4.42116	4.6272e-05	0.000471333	1.80094
PMAIP1	0.375769	-2.01493	4.42112	4.62783e-05	0.000471333	1.80081
SCAP	-0.416138	0.237563	-4.42076	4.63355e-05	0.000471438	1.79965
PROCR	0.684622	-0.0824677	4.42076	4.6336e-05	0.000471438	1.79964
RNH1	0.210024	0.0255418	4.42058	4.63635e-05	0.000471476	1.79908
PDHX	-0.228331	-0.123452	-4.41968	4.65076e-05	0.000472701	1.79614
MMD	0.309433	-1.31835	4.41945	4.65436e-05	0.000472805	1.79541
CALR	0.534049	0.362845	4.41931	4.65654e-05	0.000472805	1.79497
PARD6A	0.231693	-0.0714871	4.41867	4.66671e-05	0.000473596	1.79291
TCF4	0.62921	-0.0333189	4.41753	4.68504e-05	0.000475214	1.78921
MXRA7	0.291528	-0.450533	4.41683	4.69616e-05	0.000475899	1.78696
ACOX2	-0.583981	1.22537	-4.41681	4.69658e-05	0.000475899	1.78688
GTF2IRD1	0.266501	-0.581939	4.41586	4.71178e-05	0.000477146	1.78383
NME5	0.426363	0.541967	4.41574	4.71368e-05	0.000477146	1.78345
SULT1A4	-0.550293	1.33277	-4.41313	4.75591e-05	0.000481177	1.77502
DPP10-AS1	-1.65073	0.662376	-4.41293	4.7591e-05	0.000481255	1.77439
BPIFB2	0.235875	-0.3196	4.41264	4.7638e-05	0.000481485	1.77345
GNB5	0.244301	-0.70114	4.41206	4.77323e-05	0.000482193	1.77159
SERPINB3	1.7306	-0.0238496	4.41177	4.77803e-05	0.000482433	1.77064
TMEM175	0.325138	0.481424	4.4112	4.78736e-05	0.000483038	1.76879
NR4A2	0.61671	0.00562491	4.41103	4.79012e-05	0.000483038	1.76825
ZNF521	0.669034	-0.979994	4.41096	4.7913e-05	0.000483038	1.76801
INAVA	-0.453359	2.61888	-4.41043	4.79987e-05	0.000483656	1.76633
SELE	1.10534	0.802224	4.40765	4.84579e-05	0.000487834	1.75733
SH2D3C	0.239733	0.283098	4.40762	4.84623e-05	0.000487834	1.75725
PSMB10	0.394588	1.8526	4.40598	4.8734e-05	0.000490321	1.75197
SH3TC1	0.431448	-0.340987	4.40424	4.90237e-05	0.000492987	1.74637
USO1	0.211859	0.322615	4.40407	4.90519e-05	0.000493021	1.74582
KIAA1324L	-0.537711	-0.116335	-4.40379	4.91002e-05	0.000493257	1.74489
CSPG4	0.391389	-2.75986	4.40349	4.91494e-05	0.000493502	1.74395
PLPBP	-0.332092	1.17899	-4.40321	4.91971e-05	0.000493732	1.74303
ABCA8	-0.563034	0.884869	-4.40181	4.94321e-05	0.000495841	1.73853
KLF5	-0.584766	3.92037	-4.40089	4.95876e-05	0.000496835	1.73556
SYNGR2	0.384889	1.83658	4.40073	4.96143e-05	0.000496835	1.73505
PUM2	-0.301619	0.476768	-4.40067	4.9625e-05	0.000496835	1.73485
ATP5PF	-0.307717	0.699165	-4.40063	4.96311e-05	0.000496835	1.73473
HID1	0.186055	0.385037	4.39805	5.00706e-05	0.000500983	1.72641
GLRX	0.684865	1.34828	4.39778	5.01159e-05	0.000501184	1.72555
BMS1P20	0.830712	0.631042	4.39755	5.01561e-05	0.000501334	1.7248
ZNF511-PRAP1	-1.30327	3.0325	-4.39424	5.0724e-05	0.000506756	1.71416
NUDT6	-0.347445	0.377243	-4.3939	5.07841e-05	0.000507102	1.71304
SMDT1	-0.176964	0.649295	-4.39314	5.09155e-05	0.00050816	1.7106
SMAD4	-0.18036	0.358254	-4.39188	5.11353e-05	0.000510097	1.70653
CEBPD	0.631661	1.73043	4.3915	5.12009e-05	0.000510496	1.70532
LIAS	-0.362498	0.482047	-4.39043	5.13871e-05	0.000512095	1.70189
KRT81	1.00629	2.00798	4.39028	5.14133e-05	0.0005121	1.70141
[truncated: 17,903 more rows]
