# Supplementary material for: Comprehensive analysis reveals key genes and environmental toxin exposures underlying treatment response in ulcerative colitis based on in-silico analysis and Mendelian randomization
Source: Aging (Albany NY). 2023 Dec 4;15(23):14141–71. doi: 10.18632/aging.205294 (PMC10756092; doi:10.18632/aging.205294)
Supplement: Supplementary Table 7 [file aging-15-205294-s008.xls]

## Sheet: Supplementary Table 7
	Supplementary Table 7. The detailed account of the specific interplay between environmental toxin and drug exposure with DAPP1 and ELL2.
ChemicalName	GeneSymbol	Interaction Actions	Interaction detail	Organism	Reference-PubMed IDs
1,2-Dimethylhydrazine	DAPP1	affects^response to substance|increases^expression	[APC protein affects the susceptibility to 1,2-Dimethylhydrazine] which results in increased expression of DAPP1 mRNA	Rattus norvegicus	27840820
2-(1'H-indole-3'-carbonyl)thiazole-4-carboxylic acid methyl ester	DAPP1	increases^expression	2-(1'H-indole-3'-carbonyl)thiazole-4-carboxylic acid methyl ester results in increased expression of DAPP1 mRNA	Mus musculus	19933214
2,4-dinitrotoluene	DAPP1	affects^expression	2,4-dinitrotoluene affects the expression of DAPP1 mRNA	Rattus norvegicus	21346803
4,4'-diaminodiphenylmethane	DAPP1	decreases^expression	4,4'-diaminodiphenylmethane results in decreased expression of DAPP1 mRNA	Mus musculus	18648102
9,10-Dimethyl-1,2-benzanthracene	DAPP1	decreases^expression	9,10-Dimethyl-1,2-benzanthracene results in decreased expression of DAPP1 mRNA	Mesocricetus auratus	22485181
abrine	DAPP1	increases^expression	abrine results in increased expression of DAPP1 mRNA	Homo sapiens	31054353
Acetaminophen	DAPP1	decreases^expression	Acetaminophen results in decreased expression of DAPP1 mRNA	Rattus norvegicus	33387578
amphotericin B, deoxycholate drug combination	DAPP1	increases^expression	amphotericin B, deoxycholate drug combination results in increased expression of DAPP1 mRNA	Mus musculus	22863853
Antirheumatic Agents	DAPP1	decreases^expression	Antirheumatic Agents results in decreased expression of DAPP1 mRNA	Homo sapiens	24449571
aristolochic acid I	DAPP1	increases^expression	aristolochic acid I results in increased expression of DAPP1 mRNA	Homo sapiens	33212167
Arsenic Trioxide	DAPP1	increases^expression	Arsenic Trioxide results in increased expression of DAPP1 mRNA	Homo sapiens	20458559
Asbestos, Crocidolite	DAPP1	decreases^expression	Asbestos, Crocidolite results in decreased expression of DAPP1 mRNA	Homo sapiens	29523930
Beclomethasone	DAPP1	increases^expression	Beclomethasone results in increased expression of DAPP1 mRNA	Danio rerio	23656298
Benzo(a)pyrene	DAPP1	decreases^methylation	Benzo(a)pyrene results in decreased methylation of DAPP1 exon	Homo sapiens	27901495
Benzo(a)pyrene	DAPP1	decreases^methylation	Benzo(a)pyrene results in decreased methylation of DAPP1 promoter	Homo sapiens	27901495
Benzo(a)pyrene	DAPP1	increases^methylation	Benzo(a)pyrene results in increased methylation of DAPP1 3' UTR	Homo sapiens	27901495
Benzo(a)pyrene	DAPP1	affects^expression|affects^reaction	AHR protein affects the reaction [Benzo(a)pyrene affects the expression of DAPP1 mRNA]	Mus musculus	22228805
Benzo(a)pyrene	DAPP1	decreases^expression	Benzo(a)pyrene results in decreased expression of DAPP1 mRNA	Mus musculus	19770486
Benzo(a)pyrene	DAPP1	increases^expression	Benzo(a)pyrene results in increased expression of DAPP1 mRNA	Mus musculus	22228805
benzo(k)fluoranthene	DAPP1	decreases^expression	benzo(k)fluoranthene results in decreased expression of DAPP1 mRNA	Mus musculus	26377693
bisphenol A	DAPP1	affects^cotreatment|increases^methylation	[bisphenol A co-treated with Fulvestrant] results in increased methylation of DAPP1 gene	Homo sapiens	31601247
bisphenol A	DAPP1	affects^expression	bisphenol A affects the expression of DAPP1 mRNA	Rattus norvegicus	25181051
CGP 52608	DAPP1	affects^binding|increases^reaction	CGP 52608 promotes the reaction [RORA protein binds to DAPP1 gene]	Homo sapiens	28238834
Chlorodiphenyl (54% Chlorine)	DAPP1	decreases^expression	Chlorodiphenyl (54% Chlorine) results in decreased expression of DAPP1 mRNA	Mus musculus	25270620
Choline	DAPP1	affects^cotreatment|increases^expression	[Methionine deficiency co-treated with Choline deficiency co-treated with Folic Acid deficiency] results in increased expression of DAPP1 mRNA	Mus musculus	20938992
Cisplatin	DAPP1	increases^expression	Cisplatin results in increased expression of DAPP1 mRNA	Homo sapiens	27594783
Clofibrate	DAPP1	decreases^expression	Clofibrate results in decreased expression of DAPP1 mRNA	Mus musculus	25270620
Cuprizone	DAPP1	decreases^expression	Cuprizone results in decreased expression of DAPP1 mRNA	Rattus norvegicus	26577399
Cuprizone	DAPP1	increases^expression	Cuprizone results in increased expression of DAPP1 mRNA	Rattus norvegicus	27523638
dibenzothiophene	DAPP1	decreases^expression	dibenzothiophene results in decreased expression of DAPP1 mRNA	Danio rerio	23656968
Dibutyl Phthalate	DAPP1	decreases^expression	Dibutyl Phthalate results in decreased expression of DAPP1 mRNA	Mus musculus	21266533
Diethylhexyl Phthalate	DAPP1	increases^expression	Diethylhexyl Phthalate results in increased expression of DAPP1 mRNA	Homo sapiens	31163220
Dronabinol	DAPP1	decreases^expression	Dronabinol results in decreased expression of DAPP1 mRNA	Homo sapiens	29691375
Endosulfan	DAPP1	decreases^expression	Endosulfan results in decreased expression of DAPP1 mRNA	Rattus norvegicus	29391264
erucylphospho-N,N,N-trimethylpropylammonium	DAPP1	increases^expression	erucylphospho-N,N,N-trimethylpropylammonium results in increased expression of DAPP1 mRNA	Homo sapiens	29464035
Estradiol	DAPP1	increases^expression	Estradiol results in increased expression of DAPP1 mRNA	Homo sapiens	31614463
Ethanol	DAPP1	increases^expression	Ethanol results in increased expression of DAPP1 mRNA	Mus musculus	30319688
Ethinyl Estradiol	DAPP1	decreases^expression	Ethinyl Estradiol results in decreased expression of DAPP1 mRNA	Xenopus tropicalis	23129252
fipronil	DAPP1	increases^expression	fipronil results in increased expression of DAPP1 mRNA	Rattus norvegicus	23962444
Folic Acid	DAPP1	increases^expression	Folic Acid results in increased expression of DAPP1 mRNA	Mus musculus	25629700
Folic Acid	DAPP1	affects^cotreatment|increases^expression	[Methionine deficiency co-treated with Choline deficiency co-treated with Folic Acid deficiency] results in increased expression of DAPP1 mRNA	Mus musculus	20938992
Formaldehyde	DAPP1	increases^expression	Formaldehyde results in increased expression of DAPP1 mRNA	Homo sapiens	27664576
Fulvestrant	DAPP1	affects^cotreatment|increases^methylation	[bisphenol A co-treated with Fulvestrant] results in increased methylation of DAPP1 gene	Homo sapiens	31601247
furan	DAPP1	increases^methylation	furan results in increased methylation of DAPP1 gene	Rattus norvegicus	22079235
Gentamicins	DAPP1	increases^expression	Gentamicins results in increased expression of DAPP1 mRNA	Rattus norvegicus	33387578
Hydrogen Peroxide	DAPP1	affects^expression	Hydrogen Peroxide affects the expression of DAPP1 mRNA	Homo sapiens	21179406
hydroquinone	DAPP1	increases^expression	hydroquinone results in increased expression of DAPP1 mRNA	Homo sapiens	31256213
indole-3-carbinol	DAPP1	affects^expression	indole-3-carbinol affects the expression of DAPP1 mRNA	Rattus norvegicus	21396975
Ionomycin	DAPP1	affects^cotreatment|decreases^expression	[Tetradecanoylphorbol Acetate co-treated with Ionomycin] results in decreased expression of DAPP1 mRNA	Oryctolagus cuniculus	25613284
Methionine	DAPP1	affects^cotreatment|increases^expression	[Methionine deficiency co-treated with Choline deficiency co-treated with Folic Acid deficiency] results in increased expression of DAPP1 mRNA	Mus musculus	20938992
monochloropropanediol	DAPP1	decreases^expression	monochloropropanediol results in decreased expression of DAPP1 mRNA	Rattus norvegicus	28522335
Nanotubes, Carbon	DAPP1	increases^expression	Nanotubes, Carbon analog results in increased expression of DAPP1 mRNA	Mus musculus	25554681
Nanotubes, Carbon	DAPP1	increases^expression	Nanotubes, Carbon results in increased expression of DAPP1 mRNA	Mus musculus	25554681
Nickel	DAPP1	increases^expression	Nickel results in increased expression of DAPP1 mRNA	Homo sapiens	25583101
Particulate Matter	DAPP1	increases^expression	Particulate Matter results in increased expression of DAPP1 mRNA	Homo sapiens	29703138
perfluorooctane sulfonic acid	DAPP1	increases^expression	perfluorooctane sulfonic acid results in increased expression of DAPP1 mRNA	Gadus morhua	33138996
pirinixic acid	DAPP1	affects^binding|decreases^expression|increases^activity	[pirinixic acid binds to and results in increased activity of PPARA protein] which results in decreased expression of DAPP1 mRNA	Mus musculus	19710929
Plant Oils	DAPP1	increases^expression	Plant Oils results in increased expression of DAPP1 mRNA	Homo sapiens	23370395
Propylthiouracil	DAPP1	increases^expression	Propylthiouracil results in increased expression of DAPP1 mRNA	Rattus norvegicus	24780913
pyrene	DAPP1	decreases^expression	pyrene results in decreased expression of DAPP1 mRNA	Danio rerio	23656968
Silicon Dioxide	DAPP1	increases^expression	Silicon Dioxide results in increased expression of DAPP1 mRNA	Homo sapiens	25351596
Silicon Dioxide	DAPP1	decreases^expression	Silicon Dioxide results in decreased expression of DAPP1 mRNA	Mus musculus	19073995
sodium arsenite	DAPP1	affects^expression	sodium arsenite affects the expression of DAPP1 mRNA	Homo sapiens	29319823
sulforaphane	DAPP1	decreases^expression	sulforaphane results in decreased expression of DAPP1 mRNA	Homo sapiens	31838189
T-2 Toxin	DAPP1	increases^expression	T-2 Toxin results in increased expression of DAPP1 mRNA	Gallus gallus	31299295
Tetrachlorodibenzodioxin	DAPP1	affects^expression	Tetrachlorodibenzodioxin affects the expression of DAPP1 mRNA	Mus musculus	21570461
Tetrachlorodibenzodioxin	DAPP1	decreases^expression	Tetrachlorodibenzodioxin results in decreased expression of DAPP1 mRNA	Mus musculus	19770486
Tetrachlorodibenzodioxin	DAPP1	increases^expression	Tetrachlorodibenzodioxin results in increased expression of DAPP1 mRNA	Mus musculus	19465110
Tetrachlorodibenzodioxin	DAPP1	decreases^expression	Tetrachlorodibenzodioxin results in decreased expression of DAPP1 mRNA	Rattus norvegicus	34747641
Tetrachlorodibenzodioxin	DAPP1	increases^expression	Tetrachlorodibenzodioxin results in increased expression of DAPP1 mRNA	Rattus norvegicus	32109520|33387578
Tetradecanoylphorbol Acetate	DAPP1	affects^cotreatment|decreases^expression	[Tetradecanoylphorbol Acetate co-treated with Ionomycin] results in decreased expression of DAPP1 mRNA	Oryctolagus cuniculus	25613284
tinuvin	DAPP1	decreases^expression	tinuvin analog results in decreased expression of DAPP1 mRNA	Danio rerio	30315675
Tobacco Smoke Pollution	DAPP1	increases^expression	Tobacco Smoke Pollution results in increased expression of DAPP1 mRNA	Homo sapiens	33660061
Tobacco Smoke Pollution	DAPP1	affects^expression	Tobacco Smoke Pollution affects the expression of DAPP1 mRNA	Mus musculus	20133372
Tretinoin	DAPP1	increases^expression	Tretinoin results in increased expression of DAPP1 mRNA	Homo sapiens	33167477
trimellitic anhydride	DAPP1	increases^expression	trimellitic anhydride results in increased expression of DAPP1 mRNA	Mus musculus	19042947
Trinitrotoluene	DAPP1	affects^expression	Trinitrotoluene affects the expression of DAPP1 mRNA	Rattus norvegicus	21346803
triptonide	DAPP1	increases^expression	triptonide results in increased expression of DAPP1 mRNA	Mus musculus	33045310
Vehicle Emissions	DAPP1	affects^response to substance	DAPP1 protein affects the susceptibility to Vehicle Emissions	Mus musculus	31869344
vinclozolin	DAPP1	increases^expression	vinclozolin results in increased expression of DAPP1 mRNA	Rattus norvegicus	23034163
vinylidene chloride	DAPP1	increases^expression	vinylidene chloride results in increased expression of DAPP1 mRNA	Mus musculus	26682919
Zoledronic Acid	DAPP1	increases^expression	Zoledronic Acid results in increased expression of DAPP1 mRNA	Homo sapiens	20977926|24714768
1,2-Dimethylhydrazine	ELL2	decreases^expression	1,2-Dimethylhydrazine results in decreased expression of ELL2 mRNA	Mus musculus	22206623
1-Butanol	ELL2	affects^cotreatment|increases^abundance|increases^expression	[[Gasoline co-treated with 1-Butanol] results in increased abundance of [Particulate Matter co-treated with Polycyclic Aromatic Hydrocarbons]] which results in increased expression of ELL2 mRNA	Homo sapiens	29432896
2',3,3',4',5-pentachloro-4-hydroxybiphenyl	ELL2	decreases^expression	2',3,3',4',5-pentachloro-4-hydroxybiphenyl results in decreased expression of ELL2 mRNA	Rattus norvegicus	19114083
3,4,3',4'-tetrachlorobiphenyl	ELL2	decreases^reaction|increases^expression	3,4,3',4'-tetrachlorobiphenyl inhibits the reaction [Dietary Fats results in increased expression of ELL2 mRNA]	Mus musculus	19467301
4-(5-benzo(1,3)dioxol-5-yl-4-pyridin-2-yl-1H-imidazol-2-yl)benzamide	ELL2	affects^cotreatment|increases^expression	[NOG protein co-treated with Phenylmercuric Acetate co-treated with dorsomorphin co-treated with 4-(5-benzo(1,3)dioxol-5-yl-4-pyridin-2-yl-1H-imidazol-2-yl)benzamide] results in increased expression of ELL2 mRNA	Homo sapiens	27188386
4-(5-benzo(1,3)dioxol-5-yl-4-pyridin-2-yl-1H-imidazol-2-yl)benzamide	ELL2	affects^cotreatment|increases^expression	[NOG protein co-treated with Valproic Acid co-treated with dorsomorphin co-treated with 4-(5-benzo(1,3)dioxol-5-yl-4-pyridin-2-yl-1H-imidazol-2-yl)benzamide] results in increased expression of ELL2 mRNA	Homo sapiens	27188386
7,8-Dihydro-7,8-dihydroxybenzo(a)pyrene 9,10-oxide	ELL2	affects^expression	7,8-Dihydro-7,8-dihydroxybenzo(a)pyrene 9,10-oxide affects the expression of ELL2 mRNA	Homo sapiens	26238291
7,8-Dihydro-7,8-dihydroxybenzo(a)pyrene 9,10-oxide	ELL2	decreases^expression	7,8-Dihydro-7,8-dihydroxybenzo(a)pyrene 9,10-oxide results in decreased expression of ELL2 mRNA	Homo sapiens	19150397|20018196
abrine	ELL2	increases^expression	abrine results in increased expression of ELL2 mRNA	Homo sapiens	31054353
Acetaminophen	ELL2	decreases^expression	Acetaminophen results in decreased expression of ELL2 mRNA	Homo sapiens	26497421
Acetaminophen	ELL2	increases^expression	Acetaminophen results in increased expression of ELL2 mRNA	Homo sapiens	21420995
Acetaminophen	ELL2	affects^expression	Acetaminophen affects the expression of ELL2 mRNA	Mus musculus	15606129|17562736
Acetaminophen	ELL2	increases^expression	Acetaminophen results in increased expression of ELL2 mRNA	Rattus norvegicus	32479839|33387578
Aflatoxin B1	ELL2	decreases^expression	Aflatoxin B1 results in decreased expression of ELL2 mRNA	Homo sapiens	21641981
Aflatoxin B1	ELL2	decreases^methylation	Aflatoxin B1 results in decreased methylation of ELL2 gene	Homo sapiens	27153756
Antirheumatic Agents	ELL2	decreases^expression	Antirheumatic Agents results in decreased expression of ELL2 mRNA	Homo sapiens	24449571
arsenite	ELL2	affects^binding|decreases^reaction	arsenite inhibits the reaction [G3BP1 protein binds to ELL2 mRNA]	Homo sapiens	32406909
arsenite	ELL2	increases^methylation	arsenite results in increased methylation of ELL2 promoter	Homo sapiens	23974009
Asbestos, Crocidolite	ELL2	increases^expression	Asbestos, Crocidolite results in increased expression of ELL2 mRNA	Homo sapiens	18687144
Asbestos, Crocidolite	ELL2	decreases^expression	Asbestos, Crocidolite results in decreased expression of ELL2 mRNA	Mus musculus	29279043
Benzo(a)pyrene	ELL2	decreases^expression	Benzo(a)pyrene results in decreased expression of ELL2 mRNA	Homo sapiens	26238291
Benzo(a)pyrene	ELL2	decreases^methylation	Benzo(a)pyrene results in decreased methylation of ELL2 promoter	Homo sapiens	27901495
Benzo(a)pyrene	ELL2	increases^methylation	Benzo(a)pyrene results in increased methylation of ELL2 exon	Homo sapiens	27901495
bisphenol A	ELL2	affects^expression	bisphenol A affects the expression of ELL2 mRNA	Danio rerio	21786754
bisphenol A	ELL2	affects^expression	bisphenol A affects the expression of ELL2 mRNA	Homo sapiens	20170705
bisphenol A	ELL2	decreases^expression	bisphenol A results in decreased expression of ELL2 mRNA	Homo sapiens	22576693
bisphenol A	ELL2	increases^expression	bisphenol A results in increased expression of ELL2 mRNA	Homo sapiens	25047013
bisphenol A	ELL2	increases^methylation	bisphenol A results in increased methylation of ELL2 gene	Homo sapiens	22576693
bisphenol A	ELL2	increases^expression	bisphenol A results in increased expression of ELL2 mRNA	Mus musculus	25594700
bisphenol A	ELL2	affects^expression	bisphenol A affects the expression of ELL2 mRNA	Pimephales promelas	21786754
bisphenol A	ELL2	decreases^expression	bisphenol A results in decreased expression of ELL2 mRNA	Rattus norvegicus	25181051
Cadmium	ELL2	increases^expression	Cadmium results in increased expression of ELL2 mRNA	Homo sapiens	21172416
Cadmium Chloride	ELL2	decreases^expression	Cadmium Chloride results in decreased expression of ELL2 mRNA	Homo sapiens	26472689
Caffeine	ELL2	increases^phosphorylation	Caffeine results in increased phosphorylation of ELL2 protein	Homo sapiens	35688186
Cannabidiol	ELL2	increases^expression	Cannabidiol results in increased expression of ELL2 mRNA	Homo sapiens	33244087
Carbon Tetrachloride	ELL2	increases^expression	Carbon Tetrachloride results in increased expression of ELL2 mRNA	Mus musculus	31919559
Choline	ELL2	affects^cotreatment|decreases^methylation	[Methionine deficiency co-treated with Choline deficiency co-treated with Folic Acid deficiency] results in decreased methylation of ELL2 gene	Mus musculus	20938992
Ciguatoxins	ELL2	affects^expression	Ciguatoxins affects the expression of ELL2 mRNA	Mus musculus	18353800
Copper	ELL2	affects^binding|decreases^expression	[Disulfiram binds to Copper] which results in decreased expression of ELL2 mRNA	Homo sapiens	24690739
Copper Sulfate	ELL2	increases^expression	Copper Sulfate results in increased expression of ELL2 mRNA	Homo sapiens	19549813
Cyclosporine	ELL2	decreases^expression	Cyclosporine results in decreased expression of ELL2 mRNA	Homo sapiens	20106945|25562108
deoxynivalenol	ELL2	increases^expression	deoxynivalenol results in increased expression of ELL2 mRNA	Sus scrofa	35307453
Dibutyl Phthalate	ELL2	increases^expression	Dibutyl Phthalate results in increased expression of ELL2 mRNA	Mus musculus	21266533
Dieldrin	ELL2	increases^expression	Dieldrin results in increased expression of ELL2 mRNA	Danio rerio	28385952
Dietary Carbohydrates	ELL2	decreases^expression	Dietary Carbohydrates results in decreased expression of ELL2 mRNA	Homo sapiens	17490981
Dietary Fats	ELL2	decreases^reaction|increases^expression	3,4,3',4'-tetrachlorobiphenyl inhibits the reaction [Dietary Fats results in increased expression of ELL2 mRNA]	Mus musculus	19467301
Dietary Fats	ELL2	decreases^expression	Dietary Fats results in decreased expression of ELL2 mRNA	Mus musculus	18042831
Dietary Fats	ELL2	increases^expression	Dietary Fats results in increased expression of ELL2 mRNA	Mus musculus	19030233|19467301
Dietary Fats	ELL2	decreases^reaction|increases^expression	Rimonabant inhibits the reaction [Dietary Fats results in increased expression of ELL2 mRNA]	Mus musculus	19030233
Diethylstilbestrol	ELL2	increases^expression	Diethylstilbestrol results in increased expression of ELL2 mRNA	Mesocricetus auratus	25242112
Dihydrotestosterone	ELL2	increases^expression	Dihydrotestosterone results in increased expression of ELL2 mRNA	Homo sapiens	29581250
Dimethylformamide	ELL2	decreases^expression	Dimethylformamide results in decreased expression of ELL2 mRNA	Danio rerio	22169935
Dimethyl Sulfoxide	ELL2	decreases^expression	Dimethyl Sulfoxide results in decreased expression of ELL2 mRNA	Danio rerio	22169935
Diquat	ELL2	increases^expression	Diquat results in increased expression of ELL2 mRNA	Homo sapiens	21172416
Disulfiram	ELL2	affects^binding|decreases^expression	[Disulfiram binds to Copper] which results in decreased expression of ELL2 mRNA	Homo sapiens	24690739
dorsomorphin	ELL2	affects^cotreatment|increases^expression	[NOG protein co-treated with Phenylmercuric Acetate co-treated with dorsomorphin co-treated with 4-(5-benzo(1,3)dioxol-5-yl-4-pyridin-2-yl-1H-imidazol-2-yl)benzamide] results in increased expression of ELL2 mRNA	Homo sapiens	27188386
dorsomorphin	ELL2	affects^cotreatment|increases^expression	[NOG protein co-treated with Valproic Acid co-treated with dorsomorphin co-treated with 4-(5-benzo(1,3)dioxol-5-yl-4-pyridin-2-yl-1H-imidazol-2-yl)benzamide] results in increased expression of ELL2 mRNA	Homo sapiens	27188386
Dronabinol	ELL2	increases^expression	Dronabinol results in increased expression of ELL2 mRNA	Rattus norvegicus	30283037
entinostat	ELL2	increases^expression	entinostat results in increased expression of ELL2 mRNA	Homo sapiens	27188386
enzalutamide	ELL2	decreases^expression	enzalutamide results in decreased expression of ELL2 mRNA	Homo sapiens	29581250
epigallocatechin gallate	ELL2	affects^cotreatment|decreases^expression	[potassium chromate(VI) co-treated with epigallocatechin gallate] results in decreased expression of ELL2 mRNA	Homo sapiens	22079256
EPZ004777	ELL2	increases^expression	EPZ004777 results in increased expression of ELL2 mRNA	Homo sapiens	32814769
Estradiol	ELL2	decreases^expression|decreases^reaction	EGF protein inhibits the reaction [Estradiol results in decreased expression of ELL2 mRNA]	Homo sapiens	24758408
Estradiol	ELL2	decreases^expression	Estradiol results in decreased expression of ELL2 mRNA	Homo sapiens	24758408
Estradiol	ELL2	increases^expression	Estradiol results in increased expression of ELL2 mRNA	Homo sapiens	31614463
Ethinyl Estradiol	ELL2	affects^expression	Ethinyl Estradiol affects the expression of ELL2 mRNA	Homo sapiens	20170705|26865667
ethylene dichloride	ELL2	decreases^expression	ethylene dichloride results in decreased expression of ELL2 mRNA	Mus musculus	28960355
Fenretinide	ELL2	decreases^expression	Fenretinide results in decreased expression of ELL2 mRNA	Mus musculus	28973697
fipronil	ELL2	affects^expression	fipronil affects the expression of ELL2 mRNA	Danio rerio	32977147
Folic Acid	ELL2	affects^cotreatment|decreases^methylation	[Methionine deficiency co-treated with Choline deficiency co-treated with Folic Acid deficiency] results in decreased methylation of ELL2 gene	Mus musculus	20938992
Gasoline	ELL2	affects^cotreatment|increases^abundance|increases^expression	[[Gasoline co-treated with 1-Butanol] results in increased abundance of [Particulate Matter co-treated with Polycyclic Aromatic Hydrocarbons]] which results in increased expression of ELL2 mRNA	Homo sapiens	29432896
geldanamycin	ELL2	increases^expression	geldanamycin results in increased expression of ELL2 mRNA	Homo sapiens	26705709
Genistein	ELL2	affects^expression	Genistein affects the expression of ELL2 mRNA	Homo sapiens	26865667
Gentamicins	ELL2	decreases^expression	Gentamicins results in decreased expression of ELL2 mRNA	Rattus norvegicus	22061828
Gentamicins	ELL2	increases^expression	Gentamicins results in increased expression of ELL2 mRNA	Rattus norvegicus	33387578
GW 4064	ELL2	affects^binding|increases^reaction	GW 4064 promotes the reaction [NR1H4 protein binds to ELL2 gene]	Mus musculus	20091679
Hydrogen Peroxide	ELL2	affects^expression	Hydrogen Peroxide affects the expression of ELL2 mRNA	Homo sapiens	20044591
ICG 001	ELL2	increases^expression	ICG 001 results in increased expression of ELL2 mRNA	Homo sapiens	26191083
Isoproterenol	ELL2	increases^expression	Isoproterenol results in increased expression of ELL2 mRNA	Mus musculus	20003209
Isotretinoin	ELL2	decreases^expression	Isotretinoin results in decreased expression of ELL2 mRNA	Homo sapiens	20436886
jinfukang	ELL2	decreases^expression	jinfukang results in decreased expression of ELL2 mRNA	Homo sapiens	27392435
(+)-JQ1 compound	ELL2	increases^expression	(+)-JQ1 compound results in increased expression of ELL2 mRNA	Homo sapiens	23430699
K 7174	ELL2	increases^expression	K 7174 results in increased expression of ELL2 mRNA	Homo sapiens	24086573
Leflunomide	ELL2	increases^expression	Leflunomide results in increased expression of ELL2 mRNA	Homo sapiens	28988120
Leflunomide	ELL2	increases^expression	Leflunomide results in increased expression of ELL2 mRNA	Rattus norvegicus	24136188
Magnetite Nanoparticles	ELL2	affects^binding|increases^expression	[Succimer binds to Magnetite Nanoparticles] which results in increased expression of ELL2 mRNA	Mus musculus	21641980
methidathion	ELL2	increases^expression	methidathion results in increased expression of ELL2 mRNA	Mus musculus	34813904
Methionine	ELL2	affects^cotreatment|decreases^methylation	[Methionine deficiency co-treated with Choline deficiency co-treated with Folic Acid deficiency] results in decreased methylation of ELL2 gene	Mus musculus	20938992
methylmercuric chloride	ELL2	increases^expression	methylmercuric chloride results in increased expression of ELL2 mRNA	Gadus morhua	23103053
methylmercuric chloride	ELL2	decreases^expression	methylmercuric chloride results in decreased expression of ELL2 mRNA	Homo sapiens	28001369
methylmercuric chloride	ELL2	increases^expression	methylmercuric chloride results in increased expression of ELL2 mRNA	Homo sapiens	28001369
Metribolone	ELL2	increases^expression	Metribolone results in increased expression of ELL2 mRNA	Homo sapiens	16751804|17010675
momfluorothrin	ELL2	decreases^expression	momfluorothrin results in decreased expression of ELL2 mRNA	Rattus norvegicus	28520973
Nanotubes, Carbon	ELL2	increases^expression	Nanotubes, Carbon analog results in increased expression of ELL2 mRNA	Mus musculus	25554681
Nanotubes, Carbon	ELL2	increases^expression	Nanotubes, Carbon results in increased expression of ELL2 mRNA	Mus musculus	25554681
Nickel	ELL2	affects^expression	Nickel affects the expression of ELL2 mRNA	Homo sapiens	14575637
Nickel	ELL2	affects^expression|decreases^reaction	trichostatin A inhibits the reaction [Nickel affects the expression of ELL2 mRNA]	Homo sapiens	14575637
N-Methyl-3,4-methylenedioxyamphetamine	ELL2	decreases^expression	N-Methyl-3,4-methylenedioxyamphetamine results in decreased expression of ELL2 mRNA	Mus musculus	26251327
Oxycodone	ELL2	increases^expression	Oxycodone results in increased expression of ELL2 mRNA	Rattus norvegicus	23439660
Oxygen	ELL2	increases^expression	Oxygen deficiency results in increased expression of ELL2 mRNA	Homo sapiens	24236059
Palm Oil	ELL2	decreases^expression	Palm Oil results in decreased expression of ELL2 mRNA	Mus musculus	18042831
Particulate Matter	ELL2	affects^cotreatment|increases^abundance|increases^expression	[[Gasoline co-treated with 1-Butanol] results in increased abundance of [Particulate Matter co-treated with Polycyclic Aromatic Hydrocarbons]] which results in increased expression of ELL2 mRNA	Homo sapiens	29432896
Particulate Matter	ELL2	decreases^expression	Particulate Matter results in decreased expression of ELL2 mRNA	Mus musculus	32873817
PCI 5002	ELL2	affects^cotreatment|increases^expression	[PCI 5002 co-treated with Zinc] results in increased expression of ELL2 mRNA	Homo sapiens	18593933
Pentachlorophenol	ELL2	increases^expression	Pentachlorophenol results in increased expression of ELL2 mRNA	Danio rerio	24642059
perfluorooctanesulfonamide	ELL2	increases^expression	perfluorooctanesulfonamide results in increased expression of ELL2 mRNA	Danio rerio	31706782
Phenformin	ELL2	decreases^expression	Phenformin results in decreased expression of ELL2 mRNA	Rattus norvegicus	31324951
Phenol	ELL2	increases^expression	Phenol results in increased expression of ELL2 mRNA	Homo sapiens	17547211
Phenylmercuric Acetate	ELL2	affects^cotreatment|increases^expression	[NOG protein co-treated with Phenylmercuric Acetate co-treated with dorsomorphin co-treated with 4-(5-benzo(1,3)dioxol-5-yl-4-pyridin-2-yl-1H-imidazol-2-yl)benzamide] results in increased expression of ELL2 mRNA	Homo sapiens	27188386
Phenylmercuric Acetate	ELL2	increases^expression	Phenylmercuric Acetate results in increased expression of ELL2 mRNA	Homo sapiens	26272509
Phosgene	ELL2	affects^expression	Phosgene affects the expression of ELL2 mRNA	Mus musculus	16300373
pirinixic acid	ELL2	increases^expression	pirinixic acid results in increased expression of ELL2 mRNA	Mus musculus	18445702
Polycyclic Aromatic Hydrocarbons	ELL2	affects^cotreatment|increases^abundance|increases^expression	[[Gasoline co-treated with 1-Butanol] results in increased abundance of [Particulate Matter co-treated with Polycyclic Aromatic Hydrocarbons]] which results in increased expression of ELL2 mRNA	Homo sapiens	29432896
potassium chromate(VI)	ELL2	affects^cotreatment|decreases^expression	[potassium chromate(VI) co-treated with epigallocatechin gallate] results in decreased expression of ELL2 mRNA	Homo sapiens	22079256
potassium chromate(VI)	ELL2	decreases^expression	potassium chromate(VI) results in decreased expression of ELL2 mRNA	Homo sapiens	22079256
Progesterone	ELL2	decreases^expression	Progesterone results in decreased expression of ELL2		17510236
Quercetin	ELL2	increases^expression	Quercetin results in increased expression of ELL2 mRNA	Homo sapiens	21632981
Rimonabant	ELL2	decreases^reaction|increases^expression	Rimonabant inhibits the reaction [Dietary Fats results in increased expression of ELL2 mRNA]	Mus musculus	19030233
Rotenone	ELL2	decreases^expression	Rotenone results in decreased expression of ELL2 mRNA	Rattus norvegicus	28374803
Silicon Dioxide	ELL2	decreases^expression	Silicon Dioxide analog results in decreased expression of ELL2 mRNA	Homo sapiens	25895662
Smoke	ELL2	decreases^expression	Smoke results in decreased expression of ELL2 mRNA	Homo sapiens	34520756
sodium arsenite	ELL2	affects^expression	sodium arsenite affects the expression of ELL2 mRNA	Danio rerio	19590694
sodium arsenite	ELL2	affects^methylation	sodium arsenite affects the methylation of ELL2 gene	Homo sapiens	28589171
Soman	ELL2	increases^expression	Soman results in increased expression of ELL2 mRNA	Rattus norvegicus	19281266
Soot	ELL2	increases^expression	Soot results in increased expression of ELL2 mRNA	Mus musculus	26551751
Succimer	ELL2	affects^binding|increases^expression	[Succimer binds to Magnetite Nanoparticles] which results in increased expression of ELL2 mRNA	Mus musculus	21641980
sulforaphane	ELL2	increases^expression	sulforaphane results in increased expression of ELL2 mRNA	Homo sapiens	26833863
Sunitinib	ELL2	decreases^expression	Sunitinib results in decreased expression of ELL2 mRNA	Homo sapiens	31533062
T-2 Toxin	ELL2	decreases^expression	T-2 Toxin results in decreased expression of ELL2 mRNA	Gallus gallus	31299295
Tetrachlorodibenzodioxin	ELL2	affects^expression	Tetrachlorodibenzodioxin affects the expression of ELL2 mRNA	Homo sapiens	22298810
Tetrachlorodibenzodioxin	ELL2	increases^expression	Tetrachlorodibenzodioxin results in increased expression of ELL2 mRNA	Homo sapiens	19684285
Tetrachlorodibenzodioxin	ELL2	affects^expression	Tetrachlorodibenzodioxin affects the expression of ELL2 mRNA	Mus musculus	21570461
Tetrachlorodibenzodioxin	ELL2	decreases^expression	Tetrachlorodibenzodioxin results in decreased expression of ELL2 mRNA	Mus musculus	19770486
Tetrachlorodibenzodioxin	ELL2	increases^expression	Tetrachlorodibenzodioxin results in increased expression of ELL2 mRNA	Mus musculus	17035482
Tetrachlorodibenzodioxin	ELL2	decreases^expression|increases^response to substance	[TIPARP gene mutant form results in increased susceptibility to Tetrachlorodibenzodioxin] which results in decreased expression of ELL2 mRNA	Mus musculus	25975270
Tetrachlorodibenzodioxin	ELL2	decreases^expression	Tetrachlorodibenzodioxin results in decreased expression of ELL2 mRNA	Rattus norvegicus	32109520
Tetrachlorodibenzodioxin	ELL2	increases^expression	Tetrachlorodibenzodioxin results in increased expression of ELL2 mRNA	Rattus norvegicus	18796159
Thioacetamide	ELL2	increases^expression	Thioacetamide results in increased expression of ELL2 mRNA	Cavia porcellus	34492290
titanium dioxide	ELL2	increases^expression	titanium dioxide results in increased expression of ELL2 mRNA	Mus musculus	23557971
Tobacco Smoke Pollution	ELL2	increases^expression	Tobacco Smoke Pollution results in increased expression of ELL2 mRNA	Homo sapiens	33660061
Tobacco Smoke Pollution	ELL2	decreases^expression	Tobacco Smoke Pollution results in decreased expression of ELL2 mRNA	Mus musculus	31705857
Tretinoin	ELL2	increases^expression	Tretinoin results in increased expression of ELL2 mRNA	Homo sapiens	21934132|33167477
triadimefon	ELL2	decreases^expression	triadimefon results in decreased expression of ELL2 mRNA	Homo sapiens	26705709
trichostatin A	ELL2	affects^expression|decreases^reaction	trichostatin A inhibits the reaction [Nickel affects the expression of ELL2 mRNA]	Homo sapiens	14575637
trichostatin A	ELL2	decreases^expression	trichostatin A results in decreased expression of ELL2 mRNA	Homo sapiens	24935251
trichostatin A	ELL2	increases^expression	trichostatin A results in increased expression of ELL2 mRNA	Homo sapiens	24935251|26705709|27188386
trovafloxacin	ELL2	increases^expression	trovafloxacin results in increased expression of ELL2 mRNA	Mus musculus	35537566
Urethane	ELL2	increases^expression	Urethane results in increased expression of ELL2 mRNA	Homo sapiens	28818685
Valproic Acid	ELL2	affects^cotreatment|increases^expression	[NOG protein co-treated with Valproic Acid co-treated with dorsomorphin co-treated with 4-(5-benzo(1,3)dioxol-5-yl-4-pyridin-2-yl-1H-imidazol-2-yl)benzamide] results in increased expression of ELL2 mRNA	Homo sapiens	27188386
Valproic Acid	ELL2	affects^expression	Valproic Acid affects the expression of ELL2 mRNA	Homo sapiens	25979313
Valproic Acid	ELL2	increases^expression	Valproic Acid results in increased expression of ELL2 mRNA	Homo sapiens	19101580|23179753|23527032|26272509|28001369|29154799
Vehicle Emissions	ELL2	increases^methylation	Vehicle Emissions results in increased methylation of ELL2 gene	Mus musculus	25560391
Vorinostat	ELL2	increases^expression	Vorinostat results in increased expression of ELL2 mRNA	Homo sapiens	27188386
Zinc	ELL2	affects^cotreatment|increases^expression	[PCI 5002 co-treated with Zinc] results in increased expression of ELL2 mRNA	Homo sapiens	18593933
Zoledronic Acid	ELL2	increases^expression	Zoledronic Acid results in increased expression of ELL2 mRNA	Homo sapiens	20977926
